# Supplementary material for: Microwave Dielectric Properties of CCTO/PVA Composites
Source: Hindawi journal article supplement (doi:10.1155/2018/6067519), 2018-01-01
Supplement: f1 [file 6067519.f1.zip]

Archive with 10 entries (10 files):
- 6067519.f1/1_Porosidade_PVA_puro_x100.xls
- 6067519.f1/1b_Poros_total_PVA_puro_x100.xls
- 6067519.f1/2_Porosidade_PVA_CCTO_20_100X.xls
- 6067519.f1/2b_Poros_total_PVA_CCTO_20_100X.xls
- 6067519.f1/3_Porosidade_pva_ccto_50x100.xls
- 6067519.f1/3b_poros_total_pva_ccto_50_100x.xls
- 6067519.f1/4_pva_puro_x100_poros.tif
- 6067519.f1/5_pva_ccto_20x100_poros.tif
- 6067519.f1/6_pva_ccto_50x100_poros.tif
- 6067519.f1/Legend_of_documents.txt
