# Supplementary material for: Microwave Dielectric Properties of CCTO/PVA Composites
Source: Hindawi journal article supplement (doi:10.1155/2018/6067519), 2018-01-01
Supplement: f1 [file 6067519.f1.zip › 6067519.f1/1_Porosidade_PVA_puro_x100.xls]

Slice	Count	Total Area	Average Size	%Area	Circ.	Solidity	Feret	FeretX	FeretY	FeretAngle	MinFeret
pva_puro_sembarra.tif	2119	22573.502	10.653	2.480	0.840	0.888	3.771	606.758	395.820	120.868	1.786
