# Supplementary material for: Microwave Dielectric Properties of CCTO/PVA Composites
Source: Hindawi journal article supplement (doi:10.1155/2018/6067519), 2018-01-01
Supplement: f1 [file 6067519.f1.zip › 6067519.f1/1b_Poros_total_PVA_puro_x100.xls]

	Area	Circ.	Feret	%Area	FeretX	FeretY	FeretAngle	MinFeret	AR	Round	Solidity
1	7.305	0.496	5.146	100	157.432	0.676	113.199	2.027	2.667	0.375	0.762
2	0.913	1.000	1.511	100	155.405	1.351	153.435	0.676	2.000	0.500	1.000
3	5.022	0.448	5.277	100	807.432	4.730	39.806	2.007	3.685	0.271	0.564
4	0.913	1.000	1.511	100	927.703	1.351	116.565	0.676	2.000	0.500	1.000
5	1.826	1.000	1.911	100	818.243	2.703	135.000	1.351	1.000	1.000	1.000
6	1.370	1.000	1.911	100	408.784	4.730	45.000	1.351	1.464	0.683	0.857
7	0.457	1.000	0.956	100	551.351	3.378	135.000	0.676	1.000	1.000	1.000
8	0.913	0.785	1.911	100	756.757	3.378	135.000	0.956	2.646	0.378	0.667
9	0.457	1.000	0.956	100	902.027	3.378	135.000	0.676	1.000	1.000	1.000
10	0.457	1.000	0.956	100	928.378	4.054	135.000	0.676	1.000	1.000	1.000
11	0.913	1.000	1.511	100	407.432	4.730	116.565	0.676	2.000	0.500	1.000
12	0.457	1.000	0.956	100	760.135	4.730	135.000	0.676	1.000	1.000	1.000
13	0.913	1.000	1.511	100	762.162	6.081	116.565	0.676	2.000	0.500	1.000
14	0.457	1.000	0.956	100	108.108	6.757	135.000	0.676	1.000	1.000	1.000
15	3.652	0.914	3.378	100	158.784	6.757	143.130	1.911	1.939	0.516	0.842
16	1.370	0.754	2.436	100	404.730	8.108	33.690	1.209	2.702	0.370	0.667
17	0.457	1.000	0.956	100	814.189	6.757	135.000	0.676	1.000	1.000	1.000
18	0.457	1.000	0.956	100	618.919	7.432	135.000	0.676	1.000	1.000	1.000
19	4.109	0.726	3.639	100	889.865	8.784	21.801	2.027	1.897	0.527	0.750
20	0.457	1.000	0.956	100	766.892	8.108	135.000	0.676	1.000	1.000	1.000
21	3.652	0.479	4.533	100	162.162	8.784	153.435	1.638	3.755	0.266	0.667
22	1.370	1.000	1.911	100	402.703	10.135	45.000	1.351	1.464	0.683	0.857
23	1.370	1.000	1.911	100	883.108	8.784	135.000	1.351	1.464	0.683	0.857
24	0.913	1.000	1.511	100	762.162	9.459	116.565	0.676	2.000	0.500	1.000
25	0.457	1.000	0.956	100	767.568	9.459	135.000	0.676	1.000	1.000	1.000
26	0.457	1.000	0.956	100	827.027	9.459	135.000	0.676	1.000	1.000	1.000
27	3.196	1.000	3.022	100	879.730	9.459	153.435	1.351	1.936	0.517	0.933
28	1.826	0.857	2.137	100	181.081	10.135	108.435	1.351	1.468	0.681	0.800
29	0.457	1.000	0.956	100	399.324	10.135	135.000	0.676	1.000	1.000	1.000
30	0.457	1.000	0.956	100	768.919	10.135	135.000	0.676	1.000	1.000	1.000
31	1.826	0.857	2.137	100	929.730	10.135	108.435	1.351	1.468	0.681	0.800
32	0.457	1.000	0.956	100	270.270	10.811	135.000	0.676	1.000	1.000	1.000
33	0.457	1.000	0.956	100	394.595	10.811	135.000	0.676	1.000	1.000	1.000
34	1.826	0.740	2.786	100	879.054	11.486	165.964	0.676	4.000	0.250	1.000
35	1.370	0.967	2.137	100	300.000	12.162	161.565	0.676	3.000	0.333	1.000
36	1.826	1.000	2.137	100	770.270	12.162	161.565	1.351	1.468	0.681	0.800
37	1.826	1.000	1.911	100	876.351	12.162	135.000	1.351	1.000	1.000	1.000
38	7.761	0.527	5.447	100	927.703	12.162	97.125	3.378	1.998	0.500	0.642
39	1.370	1.000	1.911	100	275.676	14.189	45.000	1.351	1.464	0.683	0.857
40	0.457	1.000	0.956	100	167.568	13.514	135.000	0.676	1.000	1.000	1.000
41	0.457	1.000	0.956	100	772.973	13.514	135.000	0.676	1.000	1.000	1.000
42	0.457	1.000	0.956	100	272.297	14.189	135.000	0.676	1.000	1.000	1.000
43	39.719	0.156	22.933	100	578.378	32.432	45.000	4.775	8.042	0.124	0.452
44	1.826	0.740	2.786	100	759.459	14.865	165.964	0.676	4.000	0.250	1.000
45	0.913	1.000	1.511	100	778.378	16.216	153.435	0.676	2.000	0.500	1.000
46	35.153	0.209	13.581	89.610	781.757	17.568	174.289	5.124	2.556	0.391	0.636
47	8.674	0.422	7.704	100	756.081	23.649	52.125	2.389	4.375	0.229	0.644
48	98.156	0.426	14.757	98.605	905.405	27.703	15.945	12.326	1.170	0.855	0.718
49	0.457	1.000	0.956	100	502.703	18.919	135.000	0.676	1.000	1.000	1.000
50	0.913	1.000	1.511	100	854.730	19.595	153.435	0.676	2.000	0.500	1.000
51	62.546	0.173	20.989	100	793.919	26.351	176.309	8.843	2.642	0.378	0.470
52	0.913	1.000	1.511	100	847.297	21.622	153.435	0.676	2.000	0.500	1.000
53	0.457	1.000	0.956	100	845.270	22.973	135.000	0.676	1.000	1.000	1.000
54	3.196	0.943	3.022	100	883.784	24.324	26.565	1.351	1.936	0.517	0.933
55	13.240	0.501	7.704	100	896.622	23.649	164.745	3.106	3.312	0.302	0.674
56	0.913	1.000	1.511	100	787.162	26.351	116.565	0.676	2.000	0.500	1.000
57	11.870	0.449	7.704	100	827.027	27.027	164.745	3.024	3.541	0.282	0.642
58	0.457	1.000	0.956	100	502.703	27.027	135.000	0.676	1.000	1.000	1.000
59	24.196	0.780	7.309	92.453	278.378	28.378	146.310	4.730	1.494	0.669	0.848
60	0.913	1.000	1.511	100	805.405	28.378	116.565	0.676	2.000	0.500	1.000
61	0.913	1.000	1.511	100	918.919	28.378	116.565	0.676	2.000	0.500	1.000
62	23.283	0.590	9.065	100	810.811	37.162	63.435	4.054	2.558	0.391	0.857
63	0.457	1.000	0.956	100	743.243	30.405	135.000	0.676	1.000	1.000	1.000
64	16.435	0.680	6.757	97.222	572.973	37.838	53.130	4.536	1.409	0.710	0.742
65	13.696	0.877	5.812	100	921.622	31.757	125.538	4.054	1.289	0.776	0.857
66	56.154	0.279	14.205	97.561	278.378	39.865	25.346	8.108	1.692	0.591	0.660
67	6.392	0.515	5.773	100	412.838	37.838	69.444	1.967	3.652	0.274	0.778
68	2.739	0.686	3.022	100	425.676	35.135	63.435	1.351	2.119	0.472	0.800
69	0.457	1.000	0.956	100	513.514	33.784	135.000	0.676	1.000	1.000	1.000
70	245.161	0.235	40.326	99.628	927.703	35.135	98.673	17.498	2.831	0.353	0.551
71	0.457	1.000	0.956	100	578.378	35.811	135.000	0.676	1.000	1.000	1.000
72	2.739	0.615	3.445	100	830.405	35.811	168.690	1.351	3.003	0.333	0.750
73	1.370	1.000	1.911	100	912.162	37.838	45.000	1.351	1.464	0.683	0.857
74	6.392	0.344	7.644	100	562.162	42.568	45.000	1.911	5.584	0.179	0.538
75	2.283	0.403	3.940	100	702.703	37.162	120.964	1.513	3.669	0.273	0.556
76	2.739	0.769	3.378	100	394.595	39.865	36.870	1.690	2.519	0.397	0.706
77	0.457	1.000	0.956	100	576.351	37.838	135.000	0.676	1.000	1.000	1.000
78	0.913	1.000	1.511	100	811.486	37.838	116.565	0.676	2.000	0.500	1.000
79	5.478	0.809	4.273	100	908.784	38.514	161.565	1.351	3.000	0.333	1.000
80	0.913	1.000	1.511	100	913.514	38.514	116.565	0.676	2.000	0.500	1.000
81	0.457	1.000	0.956	100	400.000	39.189	135.000	0.676	1.000	1.000	1.000
82	0.913	1.000	1.511	100	414.865	39.189	153.435	0.676	2.000	0.500	1.000
83	0.457	1.000	0.956	100	918.919	39.189	135.000	0.676	1.000	1.000	1.000
84	0.913	1.000	1.511	100	424.324	39.865	153.435	0.676	2.000	0.500	1.000
85	1.826	0.611	3.022	100	738.514	40.541	153.435	1.284	3.093	0.323	0.667
86	0.913	1.000	1.511	100	425.000	41.216	116.565	0.676	2.000	0.500	1.000
87	5.478	0.809	4.273	100	908.784	41.216	161.565	1.351	3.000	0.333	1.000
88	0.913	1.000	1.511	100	913.514	41.216	116.565	0.676	2.000	0.500	1.000
89	0.913	1.000	1.511	100	129.730	41.892	116.565	0.676	2.000	0.500	1.000
90	0.457	1.000	0.956	100	394.595	41.892	135.000	0.676	1.000	1.000	1.000
91	1.370	1.000	1.911	100	848.649	41.892	135.000	1.351	1.464	0.683	0.857
92	0.457	1.000	0.956	100	401.351	42.568	135.000	0.676	1.000	1.000	1.000
93	0.457	1.000	0.956	100	1044.595	42.568	135.000	0.676	1.000	1.000	1.000
94	0.457	1.000	0.956	100	1072.973	42.568	135.000	0.676	1.000	1.000	1.000
95	315.467	0.359	37.211	99.855	543.919	75.676	60.642	17.227	2.435	0.411	0.733
96	0.457	1.000	0.956	100	575.676	43.243	135.000	0.676	1.000	1.000	1.000
97	1.826	0.857	2.436	100	708.108	43.243	123.690	1.351	2.000	0.500	0.800
98	15.522	0.239	10.489	100	911.486	43.243	104.931	3.772	3.489	0.287	0.548
99	3.196	1.000	3.022	100	848.649	45.270	26.565	1.351	1.936	0.517	0.933
100	5.478	0.643	4.273	100	810.135	44.595	108.435	2.027	2.260	0.443	0.750
101	0.457	1.000	0.956	100	918.919	44.595	135.000	0.676	1.000	1.000	1.000
102	6.848	0.406	6.757	100	134.459	45.270	143.130	2.184	4.337	0.231	0.612
103	2.283	1.000	2.436	100	708.108	47.973	56.310	1.351	1.553	0.644	0.909
104	0.913	1.000	1.511	100	845.946	45.946	153.435	0.676	2.000	0.500	1.000
105	0.457	1.000	0.956	100	281.081	48.649	135.000	0.676	1.000	1.000	1.000
106	63.915	0.174	17.684	100	949.324	50.000	136.548	12.256	1.379	0.725	0.476
107	0.913	1.000	1.511	100	708.108	49.324	116.565	0.676	2.000	0.500	1.000
108	0.913	1.000	1.511	100	277.703	50.000	153.435	0.676	2.000	0.500	1.000
109	24.653	0.390	8.887	100	276.351	52.703	171.254	5.405	1.704	0.587	0.675
110	0.913	0.785	1.911	100	810.135	51.351	45.000	0.956	2.646	0.378	0.667
111	2.739	0.555	3.445	100	924.324	50.676	101.310	1.351	2.806	0.356	0.750
112	0.913	1.000	1.511	100	427.027	51.351	116.565	0.676	2.000	0.500	1.000
113	0.913	1.000	1.511	100	947.973	51.351	116.565	0.676	2.000	0.500	1.000
114	0.913	1.000	1.511	100	809.459	52.703	153.435	0.676	2.000	0.500	1.000
115	0.457	1.000	0.956	100	275.000	53.378	135.000	0.676	1.000	1.000	1.000
116	1.370	0.967	2.137	100	548.649	53.378	161.565	0.676	3.000	0.333	1.000
117	4.565	0.536	4.273	100	810.811	56.081	108.435	2.027	2.639	0.379	0.690
118	0.913	1.000	1.511	100	275.676	56.757	153.435	0.676	2.000	0.500	1.000
119	0.457	1.000	0.956	100	913.514	57.432	135.000	0.676	1.000	1.000	1.000
120	0.457	1.000	0.956	100	272.297	58.108	135.000	0.676	1.000	1.000	1.000
121	367.513	0.157	49.269	98.509	498.649	79.730	25.159	15.856	2.816	0.355	0.587
122	1.370	0.809	2.137	100	910.811	58.108	108.435	0.676	3.000	0.333	1.000
123	0.457	1.000	0.956	100	200.000	58.784	135.000	0.676	1.000	1.000	1.000
124	3.196	1.000	2.867	100	272.973	61.486	45.000	2.027	1.380	0.725	0.875
125	4.109	1.000	3.378	100	283.784	61.486	36.870	2.027	1.539	0.650	0.900
126	0.457	1.000	0.956	100	275.676	60.135	135.000	0.676	1.000	1.000	1.000
127	0.913	1.000	1.511	100	1059.459	60.135	153.435	0.676	2.000	0.500	1.000
128	4.109	0.353	4.110	100	257.432	62.838	170.538	2.703	1.330	0.752	0.545
129	1.826	0.611	3.022	100	242.568	61.486	153.435	1.284	3.093	0.323	0.667
130	0.457	1.000	0.956	100	99.324	62.162	135.000	0.676	1.000	1.000	1.000
131	57.980	0.311	19.884	100	940.541	64.865	170.218	6.576	3.634	0.275	0.614
132	0.457	1.000	0.956	100	1069.595	62.162	135.000	0.676	1.000	1.000	1.000
133	4.109	0.498	4.919	100	237.838	64.189	15.945	1.351	4.555	0.220	0.783
134	2.283	0.599	3.445	100	252.027	62.838	168.690	0.676	5.000	0.200	1.000
135	2.283	0.599	3.445	100	263.514	62.838	168.690	0.676	5.000	0.200	1.000
136	0.457	1.000	0.956	100	275.676	62.838	135.000	0.676	1.000	1.000	1.000
137	1.370	1.000	1.911	100	283.784	64.189	45.000	1.351	1.464	0.683	0.857
138	266.161	0.252	33.053	100	279.730	64.865	139.145	14.395	2.473	0.404	0.659
139	14.609	0.588	6.229	100	1094.595	64.189	139.399	4.730	1.212	0.825	0.744
140	1.826	0.740	2.786	100	1123.649	64.189	165.964	0.676	4.000	0.250	1.000
141	0.457	1.000	0.956	100	216.216	65.541	135.000	0.676	1.000	1.000	1.000
142	15.979	0.283	7.909	97.143	302.703	72.973	70.017	4.054	1.883	0.531	0.636
143	0.457	1.000	0.956	100	1072.973	65.541	135.000	0.676	1.000	1.000	1.000
144	8.674	0.376	6.957	100	964.865	66.216	119.055	3.344	2.430	0.412	0.613
145	5.478	0.381	6.119	100	1074.324	66.216	173.660	1.351	4.404	0.227	0.727
146	0.457	1.000	0.956	100	529.054	68.243	135.000	0.676	1.000	1.000	1.000
147	0.913	0.785	1.911	100	188.514	70.946	45.000	0.956	2.646	0.378	0.667
148	0.457	1.000	0.956	100	528.378	69.595	135.000	0.676	1.000	1.000	1.000
149	0.457	1.000	0.956	100	737.838	69.595	135.000	0.676	1.000	1.000	1.000
150	0.913	1.000	1.511	100	167.568	70.270	153.435	0.676	2.000	0.500	1.000
151	3.196	0.800	3.022	100	199.324	70.270	116.565	1.911	1.668	0.600	0.778
152	2.739	1.000	2.867	100	205.405	72.297	45.000	1.814	1.809	0.553	0.800
153	0.457	1.000	0.956	100	1108.108	70.270	135.000	0.676	1.000	1.000	1.000
154	0.913	1.000	1.511	100	172.973	70.946	153.435	0.676	2.000	0.500	1.000
155	22.827	0.189	16.440	100	171.622	73.649	9.462	3.896	4.362	0.229	0.526
156	1.370	0.967	2.137	100	167.568	71.622	161.565	0.676	3.000	0.333	1.000
157	33.784	0.750	9.190	100	956.757	78.378	36.027	5.902	1.701	0.588	0.841
158	2.283	0.764	3.022	100	1045.946	72.973	26.565	1.351	2.610	0.383	0.769
159	0.457	1.000	0.956	100	170.270	72.297	135.000	0.676	1.000	1.000	1.000
160	0.913	1.000	1.511	100	277.703	72.297	116.565	0.676	2.000	0.500	1.000
161	0.457	1.000	0.956	100	535.135	72.297	135.000	0.676	1.000	1.000	1.000
162	1.826	1.000	2.137	100	914.865	72.973	161.565	1.351	1.468	0.681	0.800
163	0.457	1.000	0.956	100	1145.946	72.973	135.000	0.676	1.000	1.000	1.000
164	0.457	1.000	0.956	100	149.324	73.649	135.000	0.676	1.000	1.000	1.000
165	37.436	0.627	10.916	100	735.135	73.649	111.801	6.021	1.952	0.512	0.796
166	0.457	1.000	0.956	100	897.297	74.324	135.000	0.676	1.000	1.000	1.000
167	12.327	0.519	7.277	100	940.541	74.324	158.199	2.703	2.555	0.391	0.761
168	6.848	0.311	8.136	100	891.216	81.081	48.366	1.911	6.301	0.159	0.517
169	0.457	1.000	0.956	100	897.297	75.676	135.000	0.676	1.000	1.000	1.000
170	0.457	1.000	0.956	100	1045.270	75.676	135.000	0.676	1.000	1.000	1.000
171	1.370	1.000	1.911	100	151.351	77.703	45.000	1.351	1.464	0.683	0.857
172	1.826	0.740	2.786	100	154.730	77.027	165.964	0.676	4.000	0.250	1.000
173	5.935	0.601	4.778	100	845.946	77.703	98.130	2.027	2.608	0.383	0.765
174	1.370	1.000	1.911	100	939.189	79.054	45.000	1.351	1.464	0.683	0.857
175	10.500	0.313	9.411	100	1035.135	81.081	21.038	2.267	5.492	0.182	0.648
176	4.565	0.599	4.533	100	445.946	79.054	116.565	1.713	3.352	0.298	0.741
177	1.370	1.000	1.911	100	931.757	80.405	45.000	1.351	1.464	0.683	0.857
178	0.457	1.000	0.956	100	1129.730	79.054	135.000	0.676	1.000	1.000	1.000
179	0.457	1.000	0.956	100	129.730	81.081	135.000	0.676	1.000	1.000	1.000
180	0.457	1.000	0.956	100	545.946	81.081	135.000	0.676	1.000	1.000	1.000
181	24.196	0.331	10.999	96.226	540.541	88.514	42.510	6.345	1.844	0.542	0.561
182	96.329	0.170	34.006	99.052	920.946	112.838	69.044	7.342	6.534	0.153	0.522
183	0.913	1.000	1.511	100	1032.432	81.081	153.435	0.676	2.000	0.500	1.000
184	22.370	0.193	13.598	100	1028.378	87.162	26.565	4.233	3.562	0.281	0.587
185	2.283	0.599	3.445	100	711.486	81.757	168.690	0.676	5.000	0.200	1.000
186	1.826	1.000	2.137	100	715.541	82.432	161.565	1.351	1.468	0.681	0.800
187	2.739	0.809	2.786	100	900.000	82.432	104.036	1.351	1.809	0.553	0.857
188	38.349	0.438	12.087	97.619	966.892	83.784	153.435	5.948	2.768	0.361	0.667
189	4.109	0.447	5.146	100	982.432	83.108	156.801	1.886	3.480	0.287	0.643
190	0.457	1.000	0.956	100	1129.730	83.108	135.000	0.676	1.000	1.000	1.000
191	2.739	0.686	3.378	100	748.649	83.784	126.870	1.710	2.391	0.418	0.706
192	6.392	0.564	5.572	100	495.946	87.162	14.036	1.351	3.823	0.262	0.933
193	3.196	1.000	2.867	100	751.351	85.811	135.000	2.027	1.380	0.725	0.875
194	39.262	0.166	19.027	100	481.081	87.838	173.884	5.615	3.455	0.289	0.493
195	1.370	1.000	1.911	100	962.162	87.838	45.000	1.351	1.464	0.683	0.857
196	0.457	1.000	0.956	100	978.378	86.486	135.000	0.676	1.000	1.000	1.000
197	0.913	1.000	1.511	100	232.432	87.162	116.565	0.676	2.000	0.500	1.000
198	16.435	0.622	6.790	100	465.541	91.216	174.289	4.054	1.235	0.810	0.791
199	0.457	1.000	0.956	100	835.135	87.838	135.000	0.676	1.000	1.000	1.000
200	0.457	1.000	0.956	100	983.108	87.838	135.000	0.676	1.000	1.000	1.000
201	2.739	0.916	3.022	100	1029.054	90.541	26.565	1.351	2.082	0.480	0.857
202	0.457	1.000	0.956	100	303.378	89.865	135.000	0.676	1.000	1.000	1.000
203	14.153	0.886	5.773	100	315.541	91.216	159.444	3.822	1.536	0.651	0.849
204	0.913	1.000	1.511	100	540.541	89.865	153.435	0.676	2.000	0.500	1.000
205	2.283	0.873	2.867	100	547.297	89.865	135.000	1.433	2.308	0.433	0.769
206	32.871	0.328	14.444	100	845.946	90.541	100.784	4.054	4.138	0.242	0.716
207	1.370	0.967	2.137	100	978.378	90.541	161.565	0.676	3.000	0.333	1.000
208	0.457	1.000	0.956	100	1012.162	90.541	135.000	0.676	1.000	1.000	1.000
209	10.044	0.741	5.572	100	448.649	97.297	75.964	2.703	2.164	0.462	0.846
210	0.457	1.000	0.956	100	535.135	91.892	135.000	0.676	1.000	1.000	1.000
211	1.370	1.000	1.911	100	551.351	93.243	45.000	1.351	1.464	0.683	0.857
212	34.697	0.316	17.200	100	736.486	91.892	135.000	4.626	5.010	0.200	0.626
213	1.826	0.857	2.137	100	978.378	91.892	108.435	1.351	1.468	0.681	0.800
214	108.199	0.270	29.015	99.578	1029.730	91.892	117.759	7.519	5.271	0.190	0.650
215	0.457	1.000	0.956	100	497.297	92.568	135.000	0.676	1.000	1.000	1.000
216	2.739	0.916	2.436	100	972.973	92.568	123.690	2.027	1.124	0.890	0.800
217	14.609	0.378	8.547	100	454.054	101.351	71.565	3.324	3.050	0.328	0.667
218	4.109	0.461	4.919	100	697.973	93.243	105.945	1.351	4.555	0.220	0.783
219	0.457	1.000	0.956	100	810.811	93.243	135.000	0.676	1.000	1.000	1.000
220	0.913	1.000	1.511	100	262.162	93.919	153.435	0.676	2.000	0.500	1.000
221	1.370	0.967	2.137	100	481.081	93.919	161.565	0.676	3.000	0.333	1.000
222	2.739	0.809	2.786	100	524.324	93.919	104.036	1.351	1.809	0.553	0.857
223	4.109	0.388	5.447	100	479.054	95.270	172.875	1.351	5.128	0.195	0.720
224	2.283	1.000	2.436	100	518.919	96.622	33.690	1.351	1.553	0.644	0.909
225	0.457	1.000	0.956	100	799.324	95.270	135.000	0.676	1.000	1.000	1.000
226	0.913	1.000	1.511	100	972.297	95.270	153.435	0.676	2.000	0.500	1.000
227	15.979	0.286	11.973	94.286	466.892	99.324	16.390	2.768	5.754	0.174	0.648
228	0.457	1.000	0.956	100	93.919	96.622	135.000	0.676	1.000	1.000	1.000
229	9.131	0.605	6.757	100	769.595	97.297	143.130	2.420	3.535	0.283	0.741
230	0.457	1.000	0.956	100	794.595	97.297	135.000	0.676	1.000	1.000	1.000
231	0.457	1.000	0.956	100	93.919	98.649	135.000	0.676	1.000	1.000	1.000
232	0.457	1.000	0.956	100	762.162	99.324	135.000	0.676	1.000	1.000	1.000
233	10.500	0.824	5.146	100	312.838	103.378	23.199	3.378	1.331	0.751	0.821
234	7.305	0.795	3.940	100	318.919	101.351	120.964	3.378	1.163	0.860	0.800
235	3.196	0.718	3.639	100	506.081	101.351	158.199	1.351	2.731	0.366	0.824
236	13.240	0.310	11.082	100	990.541	101.351	127.569	2.449	5.877	0.170	0.617
237	0.913	1.000	1.511	100	434.459	102.027	153.435	0.676	2.000	0.500	1.000
238	3.196	0.564	3.940	100	439.189	105.405	59.036	1.476	3.452	0.290	0.636
239	0.913	1.000	1.511	100	451.351	102.703	153.435	0.676	2.000	0.500	1.000
240	0.457	1.000	0.956	100	467.568	102.703	135.000	0.676	1.000	1.000	1.000
241	0.457	1.000	0.956	100	510.811	102.703	135.000	0.676	1.000	1.000	1.000
242	1.826	0.857	2.436	100	513.514	102.703	146.310	1.351	2.000	0.500	0.800
243	0.457	1.000	0.956	100	788.514	102.703	135.000	0.676	1.000	1.000	1.000
244	8.674	0.273	6.655	100	461.486	106.757	23.962	2.918	2.602	0.384	0.603
245	0.913	1.000	1.511	100	159.459	105.405	153.435	0.676	2.000	0.500	1.000
246	2.283	0.764	2.786	100	300.000	105.405	165.964	1.351	2.188	0.457	0.769
247	0.913	1.000	1.511	100	791.216	105.405	116.565	0.676	2.000	0.500	1.000
248	133.766	0.253	28.865	99.659	85.811	133.108	69.444	10.249	3.523	0.284	0.597
249	0.457	1.000	0.956	100	162.162	106.081	135.000	0.676	1.000	1.000	1.000
250	4.109	1.000	3.022	100	434.459	108.784	63.435	2.027	1.340	0.746	0.857
251	0.457	1.000	0.956	100	438.514	106.081	135.000	0.676	1.000	1.000	1.000
252	1.826	0.857	2.436	100	754.054	107.432	123.690	1.351	2.000	0.500	0.800
253	2.283	0.764	3.022	100	664.189	110.135	26.565	1.351	2.610	0.383	0.769
254	3.196	1.000	3.022	100	309.459	109.459	153.435	1.351	1.936	0.517	0.933
255	0.913	1.000	1.511	100	752.703	110.135	153.435	0.676	2.000	0.500	1.000
256	0.457	1.000	0.956	100	951.351	110.135	135.000	0.676	1.000	1.000	1.000
257	0.457	1.000	0.956	100	1027.027	110.135	135.000	0.676	1.000	1.000	1.000
258	1.370	0.809	2.137	100	848.649	110.811	108.435	0.676	3.000	0.333	1.000
259	0.457	1.000	0.956	100	515.541	112.838	135.000	0.676	1.000	1.000	1.000
260	2.739	0.916	2.786	100	693.919	112.838	165.964	1.351	1.809	0.553	0.857
261	38.349	0.417	9.190	100	752.027	118.919	17.103	7.432	1.124	0.889	0.734
262	2.739	1.000	2.436	100	315.541	113.514	146.310	1.351	1.500	0.667	1.000
263	66.198	0.484	15.817	98.621	429.054	118.919	19.983	7.802	2.222	0.450	0.753
264	1.370	1.000	1.911	100	847.973	114.865	45.000	1.351	1.464	0.683	0.857
265	5.022	0.361	4.326	100	421.622	117.568	38.660	3.325	1.258	0.795	0.595
266	0.913	1.000	1.511	100	417.568	114.865	153.435	0.676	2.000	0.500	1.000
267	0.457	1.000	0.956	100	415.541	115.541	135.000	0.676	1.000	1.000	1.000
268	2.283	1.000	2.436	100	846.622	116.892	33.690	1.351	1.553	0.644	0.909
269	1.826	0.857	2.436	100	904.054	117.568	56.310	1.351	2.031	0.492	0.800
270	1.370	0.967	2.137	100	470.270	116.216	161.565	0.676	3.000	0.333	1.000
271	0.457	1.000	0.956	100	594.595	116.216	135.000	0.676	1.000	1.000	1.000
272	25.110	0.585	7.880	100	678.378	122.973	30.964	5.405	1.441	0.694	0.809
273	1.826	1.000	1.911	100	832.432	117.568	135.000	1.351	1.000	1.000	1.000
274	29.675	0.417	11.566	100	102.703	118.243	96.710	5.071	3.109	0.322	0.699
275	73.046	0.245	22.133	100	838.514	139.865	77.661	6.839	4.363	0.229	0.571
276	2.283	0.764	3.022	100	908.108	118.243	153.435	1.351	2.610	0.383	0.769
277	381.665	0.457	37.107	100	418.919	155.405	79.509	16.892	2.322	0.431	0.843
278	0.457	1.000	0.956	100	964.865	119.595	135.000	0.676	1.000	1.000	1.000
279	0.913	1.000	1.511	100	598.649	120.270	153.435	0.676	2.000	0.500	1.000
280	0.457	1.000	0.956	100	655.405	120.270	135.000	0.676	1.000	1.000	1.000
281	3.196	0.687	3.822	100	829.730	122.973	45.000	1.433	3.182	0.314	0.737
282	0.457	1.000	0.956	100	964.865	120.946	135.000	0.676	1.000	1.000	1.000
283	54.328	0.509	13.514	100	313.514	131.081	36.870	6.968	2.304	0.434	0.717
284	0.457	1.000	0.956	100	500.000	122.297	135.000	0.676	1.000	1.000	1.000
285	2.739	0.809	3.022	100	910.811	122.297	116.565	1.351	2.237	0.447	0.857
286	0.913	1.000	1.511	100	502.703	122.973	116.565	0.676	2.000	0.500	1.000
287	0.457	1.000	0.956	100	702.027	123.649	135.000	0.676	1.000	1.000	1.000
288	0.457	1.000	0.956	100	118.919	124.324	135.000	0.676	1.000	1.000	1.000
289	283.966	0.262	47.055	100	598.649	124.324	111.038	10.616	5.253	0.190	0.732
290	0.457	1.000	0.956	100	432.432	125.000	135.000	0.676	1.000	1.000	1.000
291	0.913	1.000	1.511	100	508.108	125.000	153.435	0.676	2.000	0.500	1.000
292	0.457	1.000	0.956	100	702.703	125.000	135.000	0.676	1.000	1.000	1.000
293	13.696	0.518	6.689	100	889.189	125.000	135.000	4.730	1.318	0.759	0.698
294	1.370	0.967	2.137	100	116.216	125.676	161.565	0.676	3.000	0.333	1.000
295	5.022	0.494	4.273	100	333.108	127.703	161.565	2.703	1.534	0.652	0.611
296	2.739	1.000	2.867	100	962.162	128.378	45.000	1.814	1.809	0.553	0.800
297	0.457	1.000	0.956	100	118.243	127.027	135.000	0.676	1.000	1.000	1.000
298	0.913	1.000	1.511	100	404.054	127.703	153.435	0.676	2.000	0.500	1.000
299	12.783	0.447	6.043	100	329.054	134.459	63.435	4.054	1.291	0.775	0.691
300	0.457	1.000	0.956	100	470.270	129.730	135.000	0.676	1.000	1.000	1.000
301	0.457	1.000	0.956	100	572.973	129.730	135.000	0.676	1.000	1.000	1.000
302	0.457	1.000	0.956	100	1079.054	129.730	135.000	0.676	1.000	1.000	1.000
303	90.851	0.432	19.699	99.497	335.811	131.081	120.964	7.476	2.944	0.340	0.809
304	1.370	1.000	1.911	100	385.811	131.757	45.000	1.351	1.464	0.683	0.857
305	0.457	1.000	0.956	100	572.973	131.081	135.000	0.676	1.000	1.000	1.000
306	0.913	1.000	1.511	100	575.000	131.081	153.435	0.676	2.000	0.500	1.000
307	0.457	1.000	0.956	100	791.216	131.081	135.000	0.676	1.000	1.000	1.000
308	2.739	1.000	2.867	100	1016.216	133.108	45.000	1.814	1.809	0.553	0.800
309	4.109	0.539	4.326	100	82.432	131.757	128.660	2.166	2.335	0.428	0.667
310	9.131	1.000	4.533	100	95.946	134.459	26.565	2.703	1.500	0.667	0.909
311	1.826	1.000	2.436	100	413.514	133.108	33.690	1.351	2.000	0.500	0.800
312	39.719	0.322	17.736	100	810.811	131.757	162.255	5.029	4.123	0.243	0.680
313	4.565	0.628	4.326	100	695.946	135.135	38.660	1.911	2.769	0.361	0.667
314	4.565	0.382	5.146	100	383.784	137.838	66.801	2.265	2.917	0.343	0.556
315	5.935	0.530	5.277	100	745.946	137.162	50.194	2.627	2.542	0.393	0.650
316	3.196	0.387	4.919	100	1052.703	134.459	15.945	1.335	5.097	0.196	0.667
317	0.457	1.000	0.956	100	94.595	134.459	135.000	0.676	1.000	1.000	1.000
318	1.826	0.539	3.022	100	912.838	134.459	116.565	1.209	3.493	0.286	0.667
319	0.457	1.000	0.956	100	32.432	135.135	135.000	0.676	1.000	1.000	1.000
320	8.218	0.408	5.447	100	96.622	137.838	29.745	2.703	1.804	0.554	0.706
321	0.913	1.000	1.511	100	491.892	135.135	153.435	0.676	2.000	0.500	1.000
322	0.913	1.000	1.511	100	641.216	135.135	153.435	0.676	2.000	0.500	1.000
323	0.457	1.000	0.956	100	686.486	135.135	135.000	0.676	1.000	1.000	1.000
324	4.109	1.000	2.867	100	1052.703	135.135	135.000	2.027	1.000	1.000	1.000
325	2.283	0.599	3.445	100	92.568	135.811	168.690	0.676	5.000	0.200	1.000
326	0.913	1.000	1.511	100	493.919	135.811	153.435	0.676	2.000	0.500	1.000
327	3.196	0.718	3.639	100	782.432	137.162	21.801	1.351	2.731	0.366	0.824
328	1.370	1.000	1.911	100	1075.676	137.162	45.000	1.351	1.464	0.683	0.857
329	3.652	0.785	3.822	100	1043.243	136.486	135.000	1.911	2.521	0.397	0.696
330	0.457	1.000	0.956	100	91.892	137.162	135.000	0.676	1.000	1.000	1.000
331	0.913	1.000	1.511	100	495.270	137.162	153.435	0.676	2.000	0.500	1.000
332	0.457	1.000	0.956	100	875.676	137.162	135.000	0.676	1.000	1.000	1.000
333	0.457	1.000	0.956	100	1073.649	137.162	135.000	0.676	1.000	1.000	1.000
334	1.370	0.967	2.137	100	497.297	137.838	161.565	0.676	3.000	0.333	1.000
335	2.283	0.599	3.445	100	781.757	137.838	168.690	0.676	5.000	0.200	1.000
336	2.739	0.686	3.022	100	380.405	141.892	63.435	1.351	2.089	0.479	0.800
337	26.936	0.166	20.683	100	1014.865	139.189	128.367	3.400	10.073	0.099	0.470
338	9.587	0.752	5.447	100	779.054	140.541	172.875	2.703	1.732	0.578	0.808
339	1.370	1.000	1.911	100	475.676	141.892	45.000	1.351	1.464	0.683	0.857
340	14.153	0.960	5.447	93.548	1056.757	140.541	119.745	4.054	1.311	0.763	0.886
341	0.457	1.000	0.956	100	839.189	141.216	135.000	0.676	1.000	1.000	1.000
342	0.457	1.000	0.956	100	89.189	141.892	135.000	0.676	1.000	1.000	1.000
343	31.958	0.322	14.586	100	828.378	141.892	103.392	3.758	4.205	0.238	0.714
344	23.283	0.602	9.190	100	322.297	142.568	126.027	4.400	2.351	0.425	0.779
345	0.457	1.000	0.956	100	475.676	143.243	135.000	0.676	1.000	1.000	1.000
346	0.913	1.000	1.511	100	506.757	143.243	153.435	0.676	2.000	0.500	1.000
347	0.457	1.000	0.956	100	616.216	143.243	135.000	0.676	1.000	1.000	1.000
348	2.283	0.873	2.137	100	827.027	143.243	108.435	1.911	1.000	1.000	0.714
349	0.457	1.000	0.956	100	510.135	144.595	135.000	0.676	1.000	1.000	1.000
350	1.826	0.611	3.022	100	472.973	146.622	26.565	1.209	3.493	0.286	0.667
351	0.457	1.000	0.956	100	614.189	145.270	135.000	0.676	1.000	1.000	1.000
352	0.457	1.000	0.956	100	927.027	145.270	135.000	0.676	1.000	1.000	1.000
353	0.457	1.000	0.956	100	610.811	145.946	135.000	0.676	1.000	1.000	1.000
354	8.218	0.645	5.447	100	616.216	145.946	119.745	2.867	2.113	0.473	0.766
355	0.913	1.000	1.511	100	675.676	145.946	116.565	0.676	2.000	0.500	1.000
356	0.913	1.000	1.511	100	825.000	145.946	153.435	0.676	2.000	0.500	1.000
357	0.913	1.000	1.511	100	827.027	145.946	153.435	0.676	2.000	0.500	1.000
358	0.457	1.000	0.956	100	870.270	145.946	135.000	0.676	1.000	1.000	1.000
359	4.109	0.726	3.940	100	70.946	150.676	30.964	1.814	2.627	0.381	0.783
360	0.457	1.000	0.956	100	902.027	148.649	135.000	0.676	1.000	1.000	1.000
361	0.457	1.000	0.956	100	713.514	149.324	135.000	0.676	1.000	1.000	1.000
362	2.283	0.674	2.867	100	441.892	150.000	135.000	1.911	1.727	0.579	0.714
363	8.218	0.447	7.054	100	712.162	150.676	106.699	2.002	4.403	0.227	0.783
364	1.370	0.967	2.137	100	1038.514	150.676	161.565	0.676	3.000	0.333	1.000
365	0.457	1.000	0.956	100	408.784	151.351	135.000	0.676	1.000	1.000	1.000
366	13.240	0.206	12.997	100	448.649	152.027	152.103	3.021	5.946	0.168	0.433
367	4.565	0.497	4.778	100	482.432	152.703	171.870	1.861	3.157	0.317	0.645
368	8.674	0.402	6.229	100	736.486	152.703	167.471	3.378	2.299	0.435	0.585
369	0.457	1.000	0.956	100	291.216	152.703	135.000	0.676	1.000	1.000	1.000
370	4.109	0.799	3.822	100	321.622	156.081	45.000	2.063	2.239	0.447	0.750
371	44.741	0.561	11.326	98.980	408.784	153.378	107.354	7.432	1.563	0.640	0.775
372	0.913	1.000	1.511	100	286.486	154.054	153.435	0.676	2.000	0.500	1.000
373	0.913	1.000	1.511	100	485.811	154.054	153.435	0.676	2.000	0.500	1.000
374	2.739	1.000	2.436	100	488.514	154.054	146.310	1.351	1.500	0.667	1.000
375	1.826	0.698	2.436	100	365.541	156.081	33.690	1.814	1.581	0.632	0.615
376	0.457	1.000	0.956	100	383.108	154.730	135.000	0.676	1.000	1.000	1.000
377	0.457	1.000	0.956	100	741.892	154.730	135.000	0.676	1.000	1.000	1.000
378	0.913	1.000	1.511	100	747.973	154.730	153.435	0.676	2.000	0.500	1.000
379	0.913	1.000	1.511	100	275.676	155.405	153.435	0.676	2.000	0.500	1.000
380	0.913	1.000	1.511	100	281.081	155.405	153.435	0.676	2.000	0.500	1.000
381	0.457	1.000	0.956	100	89.189	156.081	135.000	0.676	1.000	1.000	1.000
382	0.457	1.000	0.956	100	59.459	156.757	135.000	0.676	1.000	1.000	1.000
383	0.457	1.000	0.956	100	275.676	156.757	135.000	0.676	1.000	1.000	1.000
384	14.609	0.193	9.674	100	321.622	156.757	102.095	3.695	3.028	0.330	0.533
385	9.131	0.331	8.547	100	353.378	156.757	161.565	2.416	4.673	0.214	0.645
386	0.457	1.000	0.956	100	383.784	156.757	135.000	0.676	1.000	1.000	1.000
387	4.565	0.599	4.533	100	928.378	156.757	116.565	1.814	3.105	0.322	0.769
388	1.826	1.000	2.436	100	81.757	158.784	33.690	1.351	2.031	0.492	0.800
389	2.739	0.425	4.326	100	86.486	160.811	51.340	1.760	3.173	0.315	0.522
390	0.913	1.000	1.511	100	364.865	157.432	153.435	0.676	2.000	0.500	1.000
391	0.457	1.000	0.956	100	502.703	157.432	135.000	0.676	1.000	1.000	1.000
392	0.457	1.000	0.956	100	572.297	157.432	135.000	0.676	1.000	1.000	1.000
393	0.457	1.000	0.956	100	681.081	157.432	135.000	0.676	1.000	1.000	1.000
394	0.457	1.000	0.956	100	843.243	158.108	135.000	0.676	1.000	1.000	1.000
395	6.848	0.505	5.572	100	240.541	160.135	14.036	2.027	3.223	0.310	0.698
396	0.457	1.000	0.956	100	456.757	158.784	135.000	0.676	1.000	1.000	1.000
397	0.457	1.000	0.956	100	502.703	158.784	135.000	0.676	1.000	1.000	1.000
398	0.913	1.000	1.511	100	1089.189	158.784	153.435	0.676	2.000	0.500	1.000
399	1.370	0.967	2.137	100	1078.378	159.459	161.565	0.676	3.000	0.333	1.000
400	0.457	1.000	0.956	100	967.568	160.135	135.000	0.676	1.000	1.000	1.000
401	15.979	0.495	9.065	100	1029.054	160.811	116.565	3.265	3.646	0.274	0.745
402	0.457	1.000	0.956	100	1097.297	160.811	135.000	0.676	1.000	1.000	1.000
403	0.457	1.000	0.956	100	239.189	161.486	135.000	0.676	1.000	1.000	1.000
404	11.413	0.472	6.757	100	757.432	165.541	36.870	3.694	1.932	0.518	0.649
405	0.457	1.000	0.956	100	897.297	162.162	135.000	0.676	1.000	1.000	1.000
406	0.457	1.000	0.956	100	32.432	162.838	135.000	0.676	1.000	1.000	1.000
407	1.370	0.967	2.137	100	716.216	162.838	161.565	0.676	3.000	0.333	1.000
408	0.913	1.000	1.511	100	332.432	164.189	153.435	0.676	2.000	0.500	1.000
409	0.913	1.000	1.511	100	493.919	164.865	153.435	0.676	2.000	0.500	1.000
410	1.370	1.000	1.911	100	59.459	165.541	135.000	1.351	1.464	0.683	0.857
411	0.457	1.000	0.956	100	342.568	165.541	135.000	0.676	1.000	1.000	1.000
412	0.913	1.000	1.511	100	506.081	165.541	153.435	0.676	2.000	0.500	1.000
413	0.457	1.000	0.956	100	345.270	166.216	135.000	0.676	1.000	1.000	1.000
414	6.848	0.612	4.326	100	318.919	170.270	51.340	2.992	1.763	0.567	0.667
415	0.457	1.000	0.956	100	324.324	166.892	135.000	0.676	1.000	1.000	1.000
416	0.457	1.000	0.956	100	345.946	167.568	135.000	0.676	1.000	1.000	1.000
417	0.913	1.000	1.511	100	740.541	167.568	116.565	0.676	2.000	0.500	1.000
418	8.674	0.624	5.812	100	798.649	168.243	125.538	3.190	2.165	0.462	0.691
419	4.109	0.923	3.022	100	83.108	168.919	116.565	2.027	1.343	0.745	0.857
420	1.826	1.000	1.911	100	324.324	168.919	135.000	1.351	1.000	1.000	1.000
421	1.370	1.000	1.911	100	740.541	170.270	135.000	1.351	1.464	0.683	0.857
422	0.913	1.000	1.511	100	832.432	170.270	153.435	0.676	2.000	0.500	1.000
423	0.913	1.000	1.511	100	845.946	170.270	116.565	0.676	2.000	0.500	1.000
424	0.457	1.000	0.956	100	324.324	170.946	135.000	0.676	1.000	1.000	1.000
425	0.913	1.000	1.511	100	1079.730	170.946	153.435	0.676	2.000	0.500	1.000
426	6.848	0.537	5.447	100	235.811	172.297	172.875	2.703	1.970	0.508	0.638
427	0.457	1.000	0.956	100	327.027	171.622	135.000	0.676	1.000	1.000	1.000
428	3.196	0.455	3.940	100	829.730	173.649	30.964	2.027	2.249	0.445	0.636
429	1.370	0.643	2.436	100	323.649	172.297	123.690	1.209	2.702	0.370	0.667
430	1.826	0.857	2.436	100	616.892	174.324	56.310	1.351	2.031	0.492	0.800
431	1.826	1.000	1.911	100	83.784	172.973	135.000	1.351	1.000	1.000	1.000
432	0.913	1.000	1.511	100	233.784	172.973	153.435	0.676	2.000	0.500	1.000
433	1.370	0.754	2.436	100	243.243	174.324	33.690	1.209	2.702	0.370	0.667
434	0.457	1.000	0.956	100	697.297	172.973	135.000	0.676	1.000	1.000	1.000
435	1.370	0.967	2.137	100	833.784	172.973	161.565	0.676	3.000	0.333	1.000
436	0.457	1.000	0.956	100	245.946	173.649	135.000	0.676	1.000	1.000	1.000
437	1.370	0.967	2.137	100	827.027	173.649	161.565	0.676	3.000	0.333	1.000
438	1.370	0.809	2.137	100	983.784	173.649	108.435	0.676	3.000	0.333	1.000
439	10.957	0.294	8.784	100	245.946	175.000	157.380	3.012	4.017	0.249	0.585
440	2.283	1.000	2.436	100	1137.838	175.676	33.690	1.351	1.553	0.644	0.909
441	0.457	1.000	0.956	100	243.243	175.000	135.000	0.676	1.000	1.000	1.000
442	1.826	0.645	2.786	100	75.676	175.676	104.036	0.676	4.000	0.250	1.000
443	9.131	0.994	4.326	100	345.946	175.676	128.660	3.378	1.165	0.858	0.889
444	0.457	1.000	0.956	100	827.027	175.676	135.000	0.676	1.000	1.000	1.000
445	15.979	0.283	9.190	100	796.622	179.054	162.897	4.531	2.798	0.357	0.473
446	0.457	1.000	0.956	100	267.568	178.378	135.000	0.676	1.000	1.000	1.000
447	9.587	0.538	6.957	100	459.459	178.378	119.055	2.880	2.537	0.394	0.724
448	1.370	0.809	2.137	100	670.270	178.378	108.435	0.676	3.000	0.333	1.000
449	0.457	1.000	0.956	100	1113.514	178.378	135.000	0.676	1.000	1.000	1.000
450	1.826	0.740	2.786	100	882.432	179.730	165.964	0.676	4.000	0.250	1.000
451	0.457	1.000	0.956	100	64.865	180.405	135.000	0.676	1.000	1.000	1.000
452	0.913	1.000	1.511	100	881.081	181.081	153.435	0.676	2.000	0.500	1.000
453	0.457	1.000	0.956	100	883.108	181.757	135.000	0.676	1.000	1.000	1.000
454	0.457	1.000	0.956	100	64.865	182.432	135.000	0.676	1.000	1.000	1.000
455	36.523	0.665	8.810	100	391.216	183.108	122.471	7.432	1.360	0.735	0.808
456	16.892	0.271	9.190	100	405.405	190.541	53.973	5.240	2.180	0.459	0.561
457	2.739	0.809	2.786	100	610.811	183.108	104.036	1.351	1.809	0.553	0.857
458	0.913	1.000	1.511	100	802.027	183.108	153.435	0.676	2.000	0.500	1.000
459	0.913	1.000	1.511	100	486.486	183.784	153.435	0.676	2.000	0.500	1.000
460	0.457	1.000	0.956	100	675.676	183.784	135.000	0.676	1.000	1.000	1.000
461	1.370	1.000	1.911	100	464.865	184.459	135.000	1.351	1.464	0.683	0.857
462	0.913	1.000	1.511	100	716.216	184.459	153.435	0.676	2.000	0.500	1.000
463	0.457	1.000	0.956	100	297.297	185.135	135.000	0.676	1.000	1.000	1.000
464	2.739	0.686	3.378	100	740.541	185.135	143.130	1.513	2.778	0.360	0.706
465	2.283	1.000	2.436	100	58.784	186.486	146.310	1.351	1.553	0.644	0.909
466	5.022	0.530	5.277	100	610.811	186.486	140.194	2.166	3.263	0.306	0.611
467	0.913	1.000	1.511	100	297.297	187.162	116.565	0.676	2.000	0.500	1.000
468	0.457	1.000	0.956	100	843.243	187.162	135.000	0.676	1.000	1.000	1.000
469	38.349	0.707	9.387	98.810	75.676	189.865	149.744	6.757	1.296	0.772	0.848
470	0.913	1.000	1.511	100	1046.622	187.838	116.565	0.676	2.000	0.500	1.000
471	0.913	1.000	1.511	100	740.541	188.514	153.435	0.676	2.000	0.500	1.000
472	0.913	1.000	1.511	100	37.838	189.189	153.435	0.676	2.000	0.500	1.000
473	0.913	1.000	1.511	100	59.459	189.189	153.435	0.676	2.000	0.500	1.000
474	14.609	0.530	8.466	100	66.892	193.243	28.610	3.468	3.078	0.325	0.719
475	3.196	1.000	2.867	100	297.297	189.189	135.000	2.027	1.380	0.725	0.875
476	0.457	1.000	0.956	100	335.135	189.189	135.000	0.676	1.000	1.000	1.000
477	3.196	0.455	4.273	100	507.432	190.541	18.435	1.351	3.421	0.292	0.667
478	0.457	1.000	0.956	100	1129.730	189.189	135.000	0.676	1.000	1.000	1.000
479	0.913	1.000	1.511	100	48.649	189.865	116.565	0.676	2.000	0.500	1.000
480	0.913	1.000	1.511	100	291.892	189.865	153.435	0.676	2.000	0.500	1.000
481	11.413	0.504	7.554	100	1012.162	193.919	26.565	3.246	2.760	0.362	0.685
482	0.457	1.000	0.956	100	296.622	190.541	135.000	0.676	1.000	1.000	1.000
483	10.500	0.756	5.447	100	1047.973	190.541	119.745	3.265	2.086	0.479	0.754
484	0.913	1.000	1.511	100	59.459	191.216	153.435	0.676	2.000	0.500	1.000
485	0.457	1.000	0.956	100	124.324	191.216	135.000	0.676	1.000	1.000	1.000
486	7.761	0.693	5.277	100	933.784	191.216	129.806	2.839	2.197	0.455	0.708
487	1.826	0.740	2.786	100	296.622	191.892	165.964	0.676	4.000	0.250	1.000
488	0.913	1.000	1.511	100	124.324	192.568	116.565	0.676	2.000	0.500	1.000
489	14.609	0.658	7.054	100	821.622	193.919	163.301	3.378	2.007	0.498	0.810
490	0.457	1.000	0.956	100	1061.486	192.568	135.000	0.676	1.000	1.000	1.000
491	2.283	0.764	3.022	100	1062.162	193.919	153.435	1.351	2.610	0.383	0.769
492	0.457	1.000	0.956	100	66.216	194.595	135.000	0.676	1.000	1.000	1.000
493	0.913	1.000	1.511	100	297.297	194.595	116.565	0.676	2.000	0.500	1.000
494	9.131	0.487	6.229	100	443.243	196.622	12.529	2.703	2.254	0.444	0.702
495	33.784	0.826	9.190	100	1006.081	200.000	36.027	5.405	1.633	0.612	0.914
496	0.457	1.000	0.956	100	82.432	195.270	135.000	0.676	1.000	1.000	1.000
497	0.457	1.000	0.956	100	637.162	195.270	135.000	0.676	1.000	1.000	1.000
498	0.913	1.000	1.511	100	64.865	195.946	153.435	0.676	2.000	0.500	1.000
499	0.457	1.000	0.956	100	298.649	195.946	135.000	0.676	1.000	1.000	1.000
500	1.370	0.754	2.436	100	525.676	197.297	33.690	1.209	2.702	0.370	0.667
501	3.196	0.800	2.867	100	1054.054	195.946	135.000	2.027	1.247	0.802	0.824
502	15.066	0.164	13.049	100	1066.216	195.946	158.749	3.628	4.707	0.212	0.471
503	0.913	1.000	1.511	100	825.000	196.622	116.565	0.676	2.000	0.500	1.000
504	0.457	1.000	0.956	100	1052.703	196.622	135.000	0.676	1.000	1.000	1.000
505	0.913	1.000	1.511	100	489.189	197.297	116.565	0.676	2.000	0.500	1.000
506	4.565	0.887	3.378	100	551.351	197.297	126.870	2.389	1.587	0.630	0.800
507	0.457	1.000	0.956	100	1047.297	197.297	135.000	0.676	1.000	1.000	1.000
508	0.457	1.000	0.956	100	1118.919	197.297	135.000	0.676	1.000	1.000	1.000
509	0.913	1.000	1.511	100	298.649	197.973	116.565	0.676	2.000	0.500	1.000
510	2.283	0.873	2.867	100	542.568	197.973	135.000	1.433	2.308	0.433	0.769
511	126.004	0.279	24.918	99.638	927.703	216.892	40.601	11.856	2.402	0.416	0.594
512	1.826	1.000	1.911	100	1028.378	197.973	135.000	1.351	1.000	1.000	1.000
513	0.457	1.000	0.956	100	1129.054	199.324	135.000	0.676	1.000	1.000	1.000
514	0.457	1.000	0.956	100	81.081	200.000	135.000	0.676	1.000	1.000	1.000
515	0.457	1.000	0.956	100	108.108	200.000	135.000	0.676	1.000	1.000	1.000
516	19.631	0.314	9.976	100	1079.054	200.676	151.699	4.014	3.239	0.309	0.585
517	0.457	1.000	0.956	100	135.135	200.676	135.000	0.676	1.000	1.000	1.000
518	1.370	1.000	1.911	100	837.838	200.676	135.000	1.351	1.464	0.683	0.857
519	0.457	1.000	0.956	100	82.432	201.351	135.000	0.676	1.000	1.000	1.000
520	0.913	1.000	1.511	100	1124.324	201.351	116.565	0.676	2.000	0.500	1.000
521	1.826	0.740	2.786	100	33.784	202.027	165.964	0.676	4.000	0.250	1.000
522	0.457	1.000	0.956	100	81.081	202.027	135.000	0.676	1.000	1.000	1.000
523	1.826	1.000	1.911	100	700.000	202.027	135.000	1.351	1.000	1.000	1.000
524	3.196	0.515	4.273	100	832.432	202.027	161.565	1.351	3.982	0.251	0.737
525	8.218	0.687	5.447	100	837.838	207.432	60.255	2.892	2.293	0.436	0.750
526	0.457	1.000	0.956	100	1043.243	203.378	135.000	0.676	1.000	1.000	1.000
527	0.457	1.000	0.956	100	300.676	204.054	135.000	0.676	1.000	1.000	1.000
528	0.913	1.000	1.511	100	832.432	204.054	153.435	0.676	2.000	0.500	1.000
529	0.457	1.000	0.956	100	1044.595	204.054	135.000	0.676	1.000	1.000	1.000
530	0.457	1.000	0.956	100	59.459	204.730	135.000	0.676	1.000	1.000	1.000
531	1.370	0.967	2.137	100	1013.514	206.081	161.565	0.676	3.000	0.333	1.000
532	0.457	1.000	0.956	100	702.703	206.757	135.000	0.676	1.000	1.000	1.000
533	0.457	1.000	0.956	100	610.135	207.432	135.000	0.676	1.000	1.000	1.000
534	0.457	1.000	0.956	100	378.378	208.108	135.000	0.676	1.000	1.000	1.000
535	0.913	1.000	1.511	100	821.622	208.108	116.565	0.676	2.000	0.500	1.000
536	0.457	1.000	0.956	100	837.838	208.784	135.000	0.676	1.000	1.000	1.000
537	0.457	1.000	0.956	100	81.081	209.459	135.000	0.676	1.000	1.000	1.000
538	5.935	0.584	4.326	100	889.189	210.135	141.340	3.112	1.452	0.689	0.722
539	10.957	0.664	6.374	100	305.405	210.135	122.005	2.951	2.481	0.403	0.800
540	0.913	1.000	1.511	100	855.405	210.135	153.435	0.676	2.000	0.500	1.000
541	4.565	0.887	3.378	100	935.135	212.838	36.870	2.703	1.151	0.869	0.800
542	16.435	0.396	8.600	100	58.108	216.892	45.000	4.727	2.724	0.367	0.571
543	1.370	0.809	2.137	100	64.865	210.811	108.435	0.676	3.000	0.333	1.000
544	0.457	1.000	0.956	100	200.000	210.811	135.000	0.676	1.000	1.000	1.000
545	0.913	1.000	1.511	100	372.973	210.811	153.435	0.676	2.000	0.500	1.000
546	6.392	0.379	6.374	100	485.811	214.189	32.005	2.097	4.340	0.230	0.571
547	1.826	0.857	2.436	100	491.892	213.514	56.310	1.351	2.000	0.500	0.800
548	31.958	0.313	11.819	100	187.838	219.595	30.964	6.084	2.508	0.399	0.586
549	1.370	0.967	2.137	100	197.297	212.162	161.565	0.676	3.000	0.333	1.000
550	0.457	1.000	0.956	100	481.081	212.838	135.000	0.676	1.000	1.000	1.000
551	1.370	0.809	2.137	100	822.297	212.838	108.435	0.676	3.000	0.333	1.000
552	80.807	0.411	19.641	100	75.000	213.514	116.565	8.999	2.030	0.493	0.744
553	1.826	0.611	3.022	100	202.027	213.514	153.435	1.209	3.493	0.286	0.667
554	0.913	1.000	1.511	100	405.405	213.514	116.565	0.676	2.000	0.500	1.000
555	0.457	1.000	0.956	100	629.730	213.514	135.000	0.676	1.000	1.000	1.000
556	3.652	1.000	2.867	100	55.405	214.189	135.000	2.027	1.229	0.814	0.941
557	0.913	1.000	1.511	100	481.757	214.189	153.435	0.676	2.000	0.500	1.000
558	1.826	1.000	1.911	100	489.189	214.189	135.000	1.351	1.000	1.000	1.000
559	2.283	0.764	3.022	100	881.081	215.541	26.565	1.351	2.749	0.364	0.769
560	0.457	1.000	0.956	100	485.135	214.865	135.000	0.676	1.000	1.000	1.000
561	7.761	0.405	6.229	100	204.054	221.622	77.471	2.518	2.705	0.370	0.630
562	0.913	1.000	1.511	100	310.811	215.541	153.435	0.676	2.000	0.500	1.000
563	0.913	0.785	1.911	100	405.405	216.892	45.000	0.956	2.646	0.378	0.667
564	0.457	1.000	0.956	100	491.216	215.541	135.000	0.676	1.000	1.000	1.000
565	0.913	1.000	1.511	100	879.730	216.216	153.435	0.676	2.000	0.500	1.000
566	2.739	0.809	3.022	100	1097.297	216.892	116.565	1.351	2.237	0.447	0.857
567	5.478	0.967	3.639	100	311.486	218.919	21.801	2.027	1.469	0.681	0.889
568	10.500	0.775	4.919	100	306.081	220.270	164.055	3.378	1.375	0.727	0.836
569	21.914	0.444	8.466	100	981.757	220.270	151.390	5.492	1.541	0.649	0.711
570	3.196	1.000	2.867	100	1143.243	219.595	135.000	2.027	1.380	0.725	0.875
571	8.218	0.346	6.891	100	846.622	221.622	11.310	3.112	2.554	0.392	0.562
572	1.826	1.000	1.911	100	902.703	220.946	135.000	1.351	1.000	1.000	1.000
573	9.131	0.657	4.872	100	929.730	225.676	33.690	4.054	1.143	0.875	0.727
574	0.457	1.000	0.956	100	281.081	222.297	135.000	0.676	1.000	1.000	1.000
575	0.457	1.000	0.956	100	291.216	222.297	135.000	0.676	1.000	1.000	1.000
576	1.370	1.000	1.911	100	305.405	223.649	45.000	1.351	1.464	0.683	0.857
577	12.783	0.718	5.733	100	840.541	226.351	45.000	3.770	1.461	0.685	0.800
578	0.913	1.000	1.511	100	193.919	222.973	153.435	0.676	2.000	0.500	1.000
579	0.457	1.000	0.956	100	286.486	222.973	135.000	0.676	1.000	1.000	1.000
580	0.457	1.000	0.956	100	1098.649	222.973	135.000	0.676	1.000	1.000	1.000
581	8.218	0.487	6.655	100	1.351	225.000	156.038	2.419	3.561	0.281	0.706
582	0.913	1.000	1.511	100	281.081	224.324	153.435	0.676	2.000	0.500	1.000
583	0.457	1.000	0.956	100	293.919	224.324	135.000	0.676	1.000	1.000	1.000
584	1.370	1.000	1.911	100	306.757	224.324	135.000	1.351	1.464	0.683	0.857
585	0.913	1.000	1.511	100	933.108	224.324	153.435	0.676	2.000	0.500	1.000
586	7.761	0.272	8.136	100	272.297	230.405	41.634	2.389	4.105	0.244	0.515
587	0.913	1.000	1.511	100	829.730	225.000	153.435	0.676	2.000	0.500	1.000
588	0.457	1.000	0.956	100	1064.865	225.000	135.000	0.676	1.000	1.000	1.000
589	0.457	1.000	0.956	100	45.270	226.351	135.000	0.676	1.000	1.000	1.000
590	0.913	1.000	1.511	100	611.486	226.351	153.435	0.676	2.000	0.500	1.000
591	1.826	1.000	2.436	100	757.432	227.703	33.690	1.351	2.031	0.492	0.800
592	1.826	1.000	1.911	100	43.243	227.027	135.000	1.351	1.000	1.000	1.000
593	1.826	1.000	1.911	100	54.054	227.027	135.000	1.351	1.000	1.000	1.000
594	2.739	0.769	3.378	100	835.135	227.027	143.130	1.433	2.810	0.356	0.750
595	0.457	1.000	0.956	100	983.784	227.027	135.000	0.676	1.000	1.000	1.000
596	2.739	1.000	2.436	100	45.270	227.703	123.690	1.351	1.500	0.667	1.000
597	12.327	0.324	6.957	96.296	1005.405	231.081	29.055	3.930	1.761	0.568	0.628
598	70.763	0.239	25.009	99.355	323.649	229.054	128.418	5.543	5.897	0.170	0.614
599	6.848	0.869	4.778	100	381.757	229.054	135.000	2.389	2.128	0.470	0.833
600	2.739	0.555	3.639	100	612.162	229.054	111.801	1.351	3.254	0.307	0.750
601	3.196	0.314	5.277	100	832.432	229.054	140.194	1.586	5.152	0.194	0.483
602	1.370	1.000	1.911	100	902.027	229.054	135.000	1.351	1.464	0.683	0.857
603	0.913	1.000	1.511	100	1067.568	229.054	153.435	0.676	2.000	0.500	1.000
604	0.913	1.000	1.511	100	54.054	229.730	153.435	0.676	2.000	0.500	1.000
605	0.913	1.000	1.511	100	102.027	229.730	153.435	0.676	2.000	0.500	1.000
606	8.674	0.745	5.146	100	1000.000	232.432	23.199	2.703	1.906	0.525	0.826
607	0.457	1.000	0.956	100	97.297	230.405	135.000	0.676	1.000	1.000	1.000
608	6.848	0.723	4.533	93.333	268.919	234.459	63.435	2.444	2.175	0.460	0.732
609	0.913	1.000	1.511	100	1028.378	230.405	153.435	0.676	2.000	0.500	1.000
610	0.457	1.000	0.956	100	1134.459	230.405	135.000	0.676	1.000	1.000	1.000
611	1.826	0.857	2.137	100	56.081	231.081	108.435	1.351	1.468	0.681	0.800
612	0.457	1.000	0.956	100	767.568	231.757	135.000	0.676	1.000	1.000	1.000
613	0.913	1.000	1.511	100	1032.432	231.757	116.565	0.676	2.000	0.500	1.000
614	2.283	0.674	3.022	100	252.027	233.784	26.565	1.351	2.749	0.364	0.769
615	4.109	1.000	2.867	100	925.000	232.432	135.000	2.027	1.000	1.000	1.000
616	0.457	1.000	0.956	100	1005.405	232.432	135.000	0.676	1.000	1.000	1.000
617	0.913	1.000	1.511	100	833.784	233.108	153.435	0.676	2.000	0.500	1.000
618	7.761	0.486	6.374	100	983.784	233.108	122.005	2.892	2.947	0.339	0.618
619	3.652	0.335	4.919	100	245.946	235.135	15.945	2.002	3.015	0.332	0.533
620	1.826	1.000	2.137	100	320.270	235.135	161.565	1.351	1.468	0.681	0.800
621	0.457	1.000	0.956	100	626.351	234.459	135.000	0.676	1.000	1.000	1.000
622	0.913	1.000	1.511	100	82.432	235.135	116.565	0.676	2.000	0.500	1.000
623	0.457	1.000	0.956	100	243.243	235.135	135.000	0.676	1.000	1.000	1.000
624	0.913	1.000	1.511	100	322.973	235.811	153.435	0.676	2.000	0.500	1.000
625	0.457	1.000	0.956	100	388.514	235.811	135.000	0.676	1.000	1.000	1.000
626	0.457	1.000	0.956	100	983.784	235.811	135.000	0.676	1.000	1.000	1.000
627	0.457	1.000	0.956	100	102.703	236.486	135.000	0.676	1.000	1.000	1.000
628	0.913	1.000	1.511	100	325.000	236.486	153.435	0.676	2.000	0.500	1.000
629	7.305	1.000	4.326	100	48.649	237.162	141.340	2.703	1.614	0.620	0.889
630	1.370	1.000	1.911	100	82.432	237.162	135.000	1.351	1.464	0.683	0.857
631	0.913	1.000	1.511	100	389.189	237.838	116.565	0.676	2.000	0.500	1.000
632	0.913	1.000	1.511	100	756.757	237.838	153.435	0.676	2.000	0.500	1.000
633	4.109	0.799	3.940	100	772.973	238.514	149.036	1.814	2.627	0.381	0.783
634	5.935	0.438	4.326	100	61.486	239.189	141.340	2.703	1.179	0.848	0.684
635	2.283	0.764	3.022	100	220.946	239.189	153.435	1.351	2.610	0.383	0.769
636	2.739	0.916	2.867	100	906.081	239.865	135.000	1.911	1.593	0.628	0.857
637	149.744	0.185	25.327	96.341	81.081	240.541	99.211	13.514	2.117	0.472	0.607
638	0.913	1.000	1.511	100	216.216	240.541	153.435	0.676	2.000	0.500	1.000
639	0.457	1.000	0.956	100	27.027	242.568	135.000	0.676	1.000	1.000	1.000
640	0.457	1.000	0.956	100	32.432	243.243	135.000	0.676	1.000	1.000	1.000
641	12.783	0.592	6.043	100	52.703	243.243	116.565	3.715	1.969	0.508	0.727
642	21.914	0.567	7.704	100	56.757	249.324	37.875	5.625	1.439	0.695	0.727
643	0.457	1.000	0.956	100	783.784	243.243	135.000	0.676	1.000	1.000	1.000
644	0.913	1.000	1.511	100	909.459	243.919	153.435	0.676	2.000	0.500	1.000
645	1.370	0.809	2.137	100	64.865	244.595	108.435	0.676	3.000	0.333	1.000
646	11.870	0.449	7.909	100	1034.459	244.595	160.017	2.779	3.351	0.298	0.722
647	1.826	1.000	2.436	100	236.486	246.622	33.690	1.351	2.031	0.492	0.800
648	3.196	0.400	4.778	100	518.919	245.270	98.130	0.676	7.000	0.143	1.000
649	3.196	0.564	3.940	100	909.459	245.270	149.036	1.814	2.842	0.352	0.667
650	0.457	1.000	0.956	100	378.378	245.946	135.000	0.676	1.000	1.000	1.000
651	2.283	0.674	3.022	100	391.892	245.946	116.565	1.351	2.610	0.383	0.769
652	5.478	0.695	3.940	100	1129.730	245.946	120.964	2.565	1.722	0.581	0.750
653	0.913	1.000	1.511	100	329.730	246.622	116.565	0.676	2.000	0.500	1.000
654	0.913	1.000	1.511	100	410.811	246.622	116.565	0.676	2.000	0.500	1.000
655	0.913	1.000	1.511	100	86.486	247.297	153.435	0.676	2.000	0.500	1.000
656	240.595	0.162	37.377	99.810	166.892	255.405	12.529	20.509	2.090	0.479	0.492
657	2.739	0.390	3.445	100	918.919	247.297	101.310	2.027	1.936	0.516	0.545
658	8.218	0.606	5.812	100	229.730	252.703	54.462	2.722	2.593	0.386	0.720
659	0.913	1.000	1.511	100	358.108	247.973	153.435	0.676	2.000	0.500	1.000
660	2.283	0.764	3.022	100	411.486	249.324	26.565	1.351	2.610	0.383	0.769
661	0.457	1.000	0.956	100	1033.784	247.973	135.000	0.676	1.000	1.000	1.000
662	0.457	1.000	0.956	100	352.703	248.649	135.000	0.676	1.000	1.000	1.000
663	0.913	1.000	1.511	100	331.757	249.324	153.435	0.676	2.000	0.500	1.000
664	0.457	1.000	0.956	100	351.351	249.324	135.000	0.676	1.000	1.000	1.000
665	1.826	1.000	1.911	100	451.351	249.324	135.000	1.351	1.000	1.000	1.000
666	0.457	1.000	0.956	100	610.811	249.324	135.000	0.676	1.000	1.000	1.000
667	1.370	1.000	1.911	100	1051.351	250.676	45.000	1.351	1.464	0.683	0.857
668	29.218	0.460	10.999	100	244.595	254.054	10.620	4.730	2.375	0.421	0.780
669	0.913	1.000	1.511	100	983.784	250.000	116.565	0.676	2.000	0.500	1.000
670	0.457	1.000	0.956	100	243.243	250.676	135.000	0.676	1.000	1.000	1.000
671	19.175	0.345	9.090	97.619	614.189	257.432	41.987	6.550	1.785	0.560	0.542
672	0.457	1.000	0.956	100	869.595	250.676	135.000	0.676	1.000	1.000	1.000
673	6.848	0.804	4.872	100	59.459	254.054	33.690	2.627	2.308	0.433	0.789
674	0.457	1.000	0.956	100	413.514	251.351	135.000	0.676	1.000	1.000	1.000
675	0.913	1.000	1.511	100	449.324	251.351	153.435	0.676	2.000	0.500	1.000
676	0.457	1.000	0.956	100	518.919	251.351	135.000	0.676	1.000	1.000	1.000
677	0.457	1.000	0.956	100	610.811	251.351	135.000	0.676	1.000	1.000	1.000
678	1.370	0.967	2.137	100	765.541	251.351	161.565	0.676	3.000	0.333	1.000
679	0.913	1.000	1.511	100	776.351	252.027	116.565	0.676	2.000	0.500	1.000
680	1.370	1.000	1.911	100	872.297	252.027	135.000	1.351	1.464	0.683	0.857
681	7.761	0.343	7.880	100	448.649	252.703	149.036	2.420	5.110	0.196	0.586
682	7.305	0.508	6.119	100	235.811	254.054	173.660	2.027	3.165	0.316	0.744
683	0.457	1.000	0.956	100	518.919	253.378	135.000	0.676	1.000	1.000	1.000
684	18.262	0.639	7.054	100	1096.622	254.054	163.301	4.730	1.292	0.774	0.792
685	2.283	0.764	3.022	100	1105.405	253.378	153.435	1.351	2.610	0.383	0.769
686	3.652	0.710	3.639	100	230.405	254.054	158.199	2.027	1.744	0.574	0.696
687	0.457	1.000	0.956	100	243.243	254.054	135.000	0.676	1.000	1.000	1.000
688	20.088	0.262	12.181	100	408.108	254.054	146.310	3.754	3.657	0.273	0.611
689	3.652	0.381	5.447	100	59.459	254.730	172.875	0.676	8.000	0.125	1.000
690	142.440	0.246	22.389	99.359	93.919	263.514	174.806	10.811	2.262	0.442	0.697
691	0.913	1.000	1.511	100	813.514	254.730	116.565	0.676	2.000	0.500	1.000
692	3.196	0.898	3.378	100	1059.459	254.730	143.130	1.814	2.339	0.427	0.778
693	9.587	0.363	7.880	100	150.676	259.459	30.964	2.956	3.273	0.306	0.636
694	15.066	0.339	7.554	93.939	212.838	260.135	10.305	4.054	1.601	0.625	0.667
695	0.457	1.000	0.956	100	1080.405	256.081	135.000	0.676	1.000	1.000	1.000
696	0.913	1.000	1.511	100	1081.757	256.757	153.435	0.676	2.000	0.500	1.000
697	1.370	0.809	2.137	100	367.568	257.432	108.435	0.676	3.000	0.333	1.000
698	25.110	0.343	10.489	94.545	1100.000	258.784	165.069	5.405	2.054	0.487	0.663
699	5.935	0.438	6.043	100	140.541	260.811	26.565	2.222	3.662	0.273	0.650
700	0.913	1.000	1.511	100	524.324	258.108	153.435	0.676	2.000	0.500	1.000
701	10.957	0.584	6.891	100	801.351	258.784	168.690	2.703	2.772	0.361	0.774
702	0.913	1.000	1.511	100	927.027	258.108	116.565	0.676	2.000	0.500	1.000
703	1.370	1.000	1.911	100	985.811	258.108	135.000	1.351	1.464	0.683	0.857
704	1.370	1.000	1.911	100	1083.784	259.459	45.000	1.351	1.464	0.683	0.857
705	1.826	1.000	1.911	100	133.108	258.784	135.000	1.351	1.000	1.000	1.000
706	1.370	0.967	2.137	100	207.432	258.784	161.565	0.676	3.000	0.333	1.000
707	0.457	1.000	0.956	100	1047.973	258.784	135.000	0.676	1.000	1.000	1.000
708	2.283	0.873	2.867	100	1085.811	258.784	135.000	1.513	2.188	0.457	0.714
709	0.457	1.000	0.956	100	48.649	259.459	135.000	0.676	1.000	1.000	1.000
710	2.739	0.916	3.022	100	135.135	260.811	26.565	1.351	2.237	0.447	0.857
711	0.457	1.000	0.956	100	210.811	259.459	135.000	0.676	1.000	1.000	1.000
712	0.457	1.000	0.956	100	189.189	260.135	135.000	0.676	1.000	1.000	1.000
713	2.283	1.000	2.436	100	207.432	260.135	146.310	1.351	1.553	0.644	0.909
714	0.457	1.000	0.956	100	987.162	260.135	135.000	0.676	1.000	1.000	1.000
715	0.457	1.000	0.956	100	59.459	260.811	135.000	0.676	1.000	1.000	1.000
716	0.457	1.000	0.956	100	131.757	260.811	135.000	0.676	1.000	1.000	1.000
717	30.588	0.564	10.576	95.522	829.730	260.811	116.565	4.730	2.206	0.453	0.802
718	0.457	1.000	0.956	100	133.108	262.162	135.000	0.676	1.000	1.000	1.000
719	3.196	0.800	3.378	100	985.811	262.162	126.870	1.710	2.408	0.415	0.737
720	0.457	1.000	0.956	100	1100.676	262.162	135.000	0.676	1.000	1.000	1.000
721	0.913	1.000	1.511	100	63.514	262.838	153.435	0.676	2.000	0.500	1.000
722	0.457	1.000	0.956	100	794.595	262.838	135.000	0.676	1.000	1.000	1.000
723	1.370	1.000	1.911	100	799.324	264.865	45.000	1.351	1.464	0.683	0.857
724	12.783	0.564	7.309	100	59.459	268.919	33.690	3.438	2.595	0.385	0.718
725	0.913	1.000	1.511	100	188.514	264.189	153.435	0.676	2.000	0.500	1.000
726	4.565	0.887	3.639	100	765.541	266.216	21.801	2.027	1.866	0.536	0.800
727	0.913	1.000	1.511	100	100.000	264.865	153.435	0.676	2.000	0.500	1.000
728	0.913	1.000	1.511	100	462.838	264.865	153.435	0.676	2.000	0.500	1.000
729	4.565	0.650	4.273	100	796.622	265.541	161.565	2.027	2.512	0.398	0.769
730	0.457	1.000	0.956	100	988.514	264.865	135.000	0.676	1.000	1.000	1.000
731	1.370	0.967	2.137	100	990.541	265.541	161.565	0.676	3.000	0.333	1.000
732	0.457	1.000	0.956	100	897.297	266.216	135.000	0.676	1.000	1.000	1.000
733	0.457	1.000	0.956	100	713.514	266.892	135.000	0.676	1.000	1.000	1.000
734	2.739	1.000	2.436	100	63.514	267.568	146.310	1.351	1.500	0.667	1.000
735	0.457	1.000	0.956	100	385.135	268.243	135.000	0.676	1.000	1.000	1.000
736	0.457	1.000	0.956	100	827.027	268.243	135.000	0.676	1.000	1.000	1.000
737	0.913	1.000	1.511	100	383.784	269.595	153.435	0.676	2.000	0.500	1.000
738	0.913	1.000	1.511	100	1048.649	270.270	153.435	0.676	2.000	0.500	1.000
739	1.370	1.000	1.911	100	1001.351	271.622	135.000	1.351	1.464	0.683	0.857
740	2.283	0.873	2.137	100	97.973	272.297	108.435	1.911	1.000	1.000	0.714
741	134.679	0.312	31.872	100	635.135	272.297	111.125	8.135	4.662	0.215	0.728
742	5.935	0.627	4.872	100	1059.459	276.351	56.310	2.419	2.646	0.378	0.722
743	2.283	0.572	3.378	100	343.919	275.676	53.130	1.433	3.053	0.328	0.625
744	0.457	1.000	0.956	100	756.081	273.649	135.000	0.676	1.000	1.000	1.000
745	0.457	1.000	0.956	100	345.946	275.000	135.000	0.676	1.000	1.000	1.000
746	1.370	0.809	2.137	100	997.973	275.000	108.435	0.676	3.000	0.333	1.000
747	0.457	1.000	0.956	100	1004.054	275.000	135.000	0.676	1.000	1.000	1.000
748	0.457	1.000	0.956	100	1005.405	275.000	135.000	0.676	1.000	1.000	1.000
749	2.283	0.572	3.378	100	1045.270	277.703	53.130	1.690	2.605	0.384	0.588
750	0.913	1.000	1.511	100	92.568	275.676	153.435	0.676	2.000	0.500	1.000
751	1.370	1.000	1.911	100	378.378	277.703	45.000	1.351	1.464	0.683	0.857
752	0.913	1.000	1.511	100	97.297	277.027	153.435	0.676	2.000	0.500	1.000
753	0.457	1.000	0.956	100	427.027	277.027	135.000	0.676	1.000	1.000	1.000
754	4.565	0.536	3.940	100	1009.459	277.027	149.036	2.627	1.611	0.621	0.645
755	2.283	0.764	2.786	100	372.973	278.378	165.964	1.351	2.188	0.457	0.769
756	0.913	1.000	1.511	100	431.757	278.378	153.435	0.676	2.000	0.500	1.000
757	6.392	0.460	5.812	100	1013.514	279.054	144.462	2.867	2.549	0.392	0.560
758	2.739	1.000	2.436	100	400.676	279.730	146.310	1.351	1.500	0.667	1.000
759	4.565	0.419	5.277	100	433.108	279.730	129.806	2.223	3.200	0.312	0.556
760	10.500	0.902	4.919	100	825.000	281.081	164.055	2.703	1.623	0.616	0.920
761	0.457	1.000	0.956	100	897.297	279.730	135.000	0.676	1.000	1.000	1.000
762	0.457	1.000	0.956	100	921.622	279.730	135.000	0.676	1.000	1.000	1.000
763	0.913	1.000	1.511	100	1118.243	279.730	153.435	0.676	2.000	0.500	1.000
764	0.457	1.000	0.956	100	173.649	280.405	135.000	0.676	1.000	1.000	1.000
765	51.589	0.225	18.931	92.920	326.351	297.297	55.176	7.325	2.973	0.336	0.549
766	0.913	1.000	1.511	100	341.892	280.405	153.435	0.676	2.000	0.500	1.000
767	0.457	1.000	0.956	100	1012.162	280.405	135.000	0.676	1.000	1.000	1.000
768	2.283	0.873	2.867	100	396.622	283.108	45.000	1.814	1.882	0.531	0.714
769	1.826	1.000	2.436	100	1031.757	282.432	33.690	1.351	2.031	0.492	0.800
770	0.913	1.000	1.511	100	1118.919	281.081	153.435	0.676	2.000	0.500	1.000
771	152.940	0.480	20.157	97.910	168.919	281.757	103.570	13.168	1.624	0.616	0.783
772	0.457	1.000	0.956	100	341.892	281.757	135.000	0.676	1.000	1.000	1.000
773	0.457	1.000	0.956	100	308.784	282.432	135.000	0.676	1.000	1.000	1.000
774	7.761	1.000	3.940	100	1139.189	285.135	30.964	3.325	1.120	0.893	0.829
775	0.457	1.000	0.956	100	541.892	283.108	135.000	0.676	1.000	1.000	1.000
776	1.826	1.000	1.911	100	679.730	283.108	135.000	1.351	1.000	1.000	1.000
777	2.283	1.000	2.436	100	1018.243	283.108	146.310	1.351	1.553	0.644	0.909
778	0.457	1.000	0.956	100	1113.514	283.108	135.000	0.676	1.000	1.000	1.000
779	2.739	0.916	3.022	100	574.324	283.784	153.435	1.351	2.082	0.480	0.857
780	0.457	1.000	0.956	100	823.649	283.784	135.000	0.676	1.000	1.000	1.000
781	0.457	1.000	0.956	100	308.108	284.459	135.000	0.676	1.000	1.000	1.000
782	3.652	0.443	4.778	100	391.216	284.459	171.870	1.351	4.730	0.211	0.727
783	0.913	0.785	1.911	100	1020.946	284.459	135.000	0.956	2.646	0.378	0.667
784	0.913	1.000	1.511	100	437.838	285.135	153.435	0.676	2.000	0.500	1.000
785	0.913	1.000	1.511	100	823.649	285.135	153.435	0.676	2.000	0.500	1.000
786	0.457	1.000	0.956	100	1129.054	285.135	135.000	0.676	1.000	1.000	1.000
787	5.022	0.976	3.822	100	337.162	289.189	45.000	2.389	1.714	0.583	0.846
788	0.913	1.000	1.511	100	441.892	286.486	153.435	0.676	2.000	0.500	1.000
789	9.131	0.423	7.277	100	579.054	287.162	158.199	2.524	3.330	0.300	0.678
790	0.457	1.000	0.956	100	540.541	287.838	135.000	0.676	1.000	1.000	1.000
791	4.109	0.923	3.639	100	825.000	289.865	21.801	1.351	2.386	0.419	0.947
792	0.457	1.000	0.956	100	918.919	289.189	135.000	0.676	1.000	1.000	1.000
793	4.109	0.923	3.639	100	591.216	289.865	158.199	1.351	2.386	0.419	0.947
794	0.457	1.000	0.956	100	543.919	290.541	135.000	0.676	1.000	1.000	1.000
795	0.457	1.000	0.956	100	589.189	290.541	135.000	0.676	1.000	1.000	1.000
796	0.457	1.000	0.956	100	822.973	290.541	135.000	0.676	1.000	1.000	1.000
797	3.652	0.645	3.940	100	181.757	291.216	149.036	1.925	2.465	0.406	0.696
798	1.826	0.740	2.786	100	441.892	291.216	165.964	0.676	4.000	0.250	1.000
799	1.370	1.000	1.911	100	548.649	292.568	45.000	1.351	1.464	0.683	0.857
800	6.392	0.811	4.273	100	818.919	291.892	161.565	2.459	2.156	0.464	0.737
801	0.457	1.000	0.956	100	1059.459	291.216	135.000	0.676	1.000	1.000	1.000
802	0.457	1.000	0.956	100	297.297	291.892	135.000	0.676	1.000	1.000	1.000
803	0.457	1.000	0.956	100	825.000	291.892	135.000	0.676	1.000	1.000	1.000
804	10.957	0.664	6.229	100	443.243	298.649	77.471	2.703	2.471	0.405	0.828
805	2.739	0.589	2.867	100	448.649	292.568	135.000	2.027	1.363	0.734	0.667
806	0.457	1.000	0.956	100	745.946	293.243	135.000	0.676	1.000	1.000	1.000
807	2.739	0.916	3.022	100	185.135	293.919	153.435	1.351	2.082	0.480	0.857
808	0.913	1.000	1.511	100	166.892	294.595	116.565	0.676	2.000	0.500	1.000
809	17.348	0.501	8.466	100	187.838	295.946	118.610	3.518	2.859	0.350	0.717
810	0.913	1.000	1.511	100	450.676	295.946	153.435	0.676	2.000	0.500	1.000
811	0.913	1.000	1.511	100	540.541	295.946	116.565	0.676	2.000	0.500	1.000
812	0.457	1.000	0.956	100	15.541	297.297	135.000	0.676	1.000	1.000	1.000
813	4.565	1.000	3.378	100	27.027	297.297	126.870	2.027	1.559	0.641	0.909
814	2.283	1.000	2.436	100	454.054	297.973	123.690	1.351	1.553	0.644	0.909
815	16.435	0.895	6.043	100	567.568	301.351	26.565	3.378	1.493	0.670	0.947
816	1.370	1.000	1.911	100	402.027	300.000	135.000	1.351	1.464	0.683	0.857
817	0.457	1.000	0.956	100	454.730	300.676	135.000	0.676	1.000	1.000	1.000
818	1.826	0.857	2.436	100	563.514	302.027	33.690	1.351	2.000	0.500	0.800
819	3.196	0.718	3.639	100	526.351	301.351	158.199	1.351	2.982	0.335	0.824
820	2.283	0.674	3.022	100	560.135	302.027	153.435	1.351	2.749	0.364	0.769
821	0.913	1.000	1.511	100	167.568	302.703	153.435	0.676	2.000	0.500	1.000
822	0.913	1.000	1.511	100	335.135	302.703	153.435	0.676	2.000	0.500	1.000
823	0.457	1.000	0.956	100	637.838	302.703	135.000	0.676	1.000	1.000	1.000
824	42.001	0.665	10.489	100	815.541	313.514	75.069	7.113	1.583	0.632	0.814
825	0.457	1.000	0.956	100	530.405	304.730	135.000	0.676	1.000	1.000	1.000
826	0.457	1.000	0.956	100	986.486	304.730	135.000	0.676	1.000	1.000	1.000
827	0.457	1.000	0.956	100	159.459	305.405	135.000	0.676	1.000	1.000	1.000
828	0.457	1.000	0.956	100	213.514	305.405	135.000	0.676	1.000	1.000	1.000
829	0.457	1.000	0.956	100	554.730	306.081	135.000	0.676	1.000	1.000	1.000
830	0.457	1.000	0.956	100	637.838	306.081	135.000	0.676	1.000	1.000	1.000
831	58.893	0.386	18.737	100	777.703	314.865	25.641	5.742	4.317	0.232	0.768
832	88.568	0.587	16.688	97.938	900.000	310.811	148.241	10.216	1.518	0.659	0.797
833	7.761	0.649	4.919	100	333.784	308.108	164.055	3.378	1.564	0.639	0.680
834	0.913	1.000	1.511	100	795.270	307.432	153.435	0.676	2.000	0.500	1.000
835	0.457	1.000	0.956	100	64.865	308.108	135.000	0.676	1.000	1.000	1.000
836	2.739	0.809	3.022	100	396.622	308.108	116.565	1.351	2.237	0.447	0.857
837	0.913	1.000	1.511	100	535.135	308.108	153.435	0.676	2.000	0.500	1.000
838	0.457	1.000	0.956	100	875.676	308.108	135.000	0.676	1.000	1.000	1.000
839	23.740	0.766	7.704	100	1124.324	308.784	164.745	4.730	1.766	0.566	0.839
840	3.196	0.496	3.445	100	151.351	308.784	101.310	2.027	1.708	0.585	0.636
841	0.913	1.000	1.511	100	802.027	308.784	153.435	0.676	2.000	0.500	1.000
842	3.196	0.434	4.778	100	537.162	309.459	171.870	0.676	7.000	0.143	1.000
843	0.913	1.000	1.511	100	794.595	309.459	153.435	0.676	2.000	0.500	1.000
844	0.457	1.000	0.956	100	637.838	310.135	135.000	0.676	1.000	1.000	1.000
845	9.131	0.572	6.229	100	808.784	310.135	130.601	3.065	2.437	0.410	0.702
846	0.457	1.000	0.956	100	264.865	311.486	135.000	0.676	1.000	1.000	1.000
847	0.913	1.000	1.511	100	421.622	311.486	153.435	0.676	2.000	0.500	1.000
848	0.913	1.000	1.511	100	804.730	311.486	153.435	0.676	2.000	0.500	1.000
849	0.457	1.000	0.956	100	935.135	312.162	135.000	0.676	1.000	1.000	1.000
850	0.457	1.000	0.956	100	16.216	313.514	135.000	0.676	1.000	1.000	1.000
851	7.305	0.671	4.778	100	329.054	313.514	135.000	2.918	1.739	0.575	0.727
852	0.457	1.000	0.956	100	461.486	313.514	135.000	0.676	1.000	1.000	1.000
853	0.457	1.000	0.956	100	731.081	313.514	135.000	0.676	1.000	1.000	1.000
854	0.457	1.000	0.956	100	460.811	314.865	135.000	0.676	1.000	1.000	1.000
855	0.457	1.000	0.956	100	523.649	314.865	135.000	0.676	1.000	1.000	1.000
856	4.109	0.923	3.639	100	729.730	316.216	21.801	1.351	2.386	0.419	0.947
857	1.370	0.809	2.137	100	427.027	315.541	108.435	0.676	3.000	0.333	1.000
858	7.761	0.305	8.358	100	324.324	316.216	104.036	1.728	6.644	0.151	0.708
859	6.848	0.269	7.704	100	340.541	316.216	164.745	2.266	4.716	0.212	0.508
860	2.739	0.916	2.867	100	147.297	318.919	45.000	1.911	1.593	0.628	0.857
861	0.913	1.000	1.511	100	196.622	316.892	116.565	0.676	2.000	0.500	1.000
862	14.153	0.456	8.547	100	1111.486	316.892	161.565	3.209	2.955	0.338	0.713
863	0.457	1.000	0.956	100	78.378	318.243	135.000	0.676	1.000	1.000	1.000
864	0.913	1.000	1.511	100	352.703	318.243	153.435	0.676	2.000	0.500	1.000
865	2.283	0.764	3.022	100	570.270	319.595	26.565	1.351	2.749	0.364	0.769
866	0.457	1.000	0.956	100	637.838	318.243	135.000	0.676	1.000	1.000	1.000
867	0.457	1.000	0.956	100	691.216	318.243	135.000	0.676	1.000	1.000	1.000
868	0.457	1.000	0.956	100	764.189	318.243	135.000	0.676	1.000	1.000	1.000
869	0.457	1.000	0.956	100	432.432	318.919	135.000	0.676	1.000	1.000	1.000
870	0.913	1.000	1.511	100	197.297	319.595	153.435	0.676	2.000	0.500	1.000
871	0.457	1.000	0.956	100	260.811	319.595	135.000	0.676	1.000	1.000	1.000
872	5.478	0.851	4.326	100	637.838	322.297	38.660	2.389	2.038	0.491	0.828
873	0.457	1.000	0.956	100	135.135	320.270	135.000	0.676	1.000	1.000	1.000
874	0.913	1.000	1.511	100	808.784	320.270	116.565	0.676	2.000	0.500	1.000
875	0.913	1.000	1.511	100	1064.865	320.270	153.435	0.676	2.000	0.500	1.000
876	7.761	0.385	5.146	100	7.432	323.649	23.199	2.703	1.691	0.591	0.680
877	1.370	0.809	2.137	100	568.243	320.946	108.435	0.676	3.000	0.333	1.000
878	9.587	0.568	5.773	100	1095.270	325.000	20.556	3.635	1.945	0.514	0.656
879	0.457	1.000	0.956	100	262.838	321.622	135.000	0.676	1.000	1.000	1.000
880	0.913	1.000	1.511	100	437.838	321.622	153.435	0.676	2.000	0.500	1.000
881	1.370	0.967	2.137	100	949.324	321.622	161.565	0.676	3.000	0.333	1.000
882	13.240	0.319	10.292	100	385.811	331.757	66.801	2.934	4.593	0.218	0.659
883	6.848	0.537	6.043	100	742.568	325.676	26.565	2.295	3.250	0.308	0.698
884	0.913	1.000	1.511	100	1064.865	322.973	153.435	0.676	2.000	0.500	1.000
885	2.739	0.916	2.786	100	1102.703	322.973	165.964	1.351	1.809	0.553	0.857
886	1.826	1.000	1.911	100	645.946	323.649	135.000	1.351	1.000	1.000	1.000
887	15.979	0.495	8.810	100	1084.459	323.649	147.529	3.785	3.125	0.320	0.700
888	50.676	0.181	19.699	96.396	202.703	324.324	120.964	8.280	3.344	0.299	0.489
889	0.913	1.000	1.511	100	331.081	324.324	153.435	0.676	2.000	0.500	1.000
890	0.913	1.000	1.511	100	943.243	324.324	153.435	0.676	2.000	0.500	1.000
891	2.283	0.764	2.786	100	444.595	325.000	165.964	1.351	2.188	0.457	0.769
892	1.370	0.754	2.436	100	939.865	325.000	146.310	1.209	2.702	0.370	0.667
893	0.457	1.000	0.956	100	1102.703	325.000	135.000	0.676	1.000	1.000	1.000
894	0.913	1.000	1.511	100	258.784	325.676	153.435	0.676	2.000	0.500	1.000
895	15.522	0.567	7.704	100	1067.568	325.676	127.875	3.762	2.378	0.421	0.716
896	1.826	0.857	2.436	100	325.676	326.351	123.690	1.351	2.000	0.500	0.800
897	10.957	0.809	5.773	100	330.405	328.378	20.556	2.703	2.191	0.456	0.889
898	0.457	1.000	0.956	100	402.703	326.351	135.000	0.676	1.000	1.000	1.000
899	8.674	0.944	4.326	100	635.811	329.730	38.660	3.378	1.298	0.770	0.864
900	1.826	1.000	2.137	100	861.486	327.703	161.565	1.351	1.468	0.681	0.800
901	5.478	0.363	4.872	100	1056.757	328.378	146.310	2.867	2.183	0.458	0.533
902	4.565	0.408	5.812	100	734.459	331.757	35.538	1.817	4.364	0.229	0.571
903	1.370	0.967	2.137	100	60.811	329.054	161.565	0.676	3.000	0.333	1.000
904	0.457	1.000	0.956	100	1135.135	329.054	135.000	0.676	1.000	1.000	1.000
905	3.652	0.645	3.940	100	38.514	329.730	149.036	1.710	2.885	0.347	0.727
906	1.370	1.000	1.911	100	132.432	329.730	135.000	1.351	1.464	0.683	0.857
907	0.913	1.000	1.511	100	331.081	329.730	153.435	0.676	2.000	0.500	1.000
908	15.066	0.299	11.184	100	920.270	329.730	115.017	3.224	4.639	0.216	0.537
909	0.913	1.000	1.511	100	1061.486	330.405	153.435	0.676	2.000	0.500	1.000
910	0.457	1.000	0.956	100	325.676	331.081	135.000	0.676	1.000	1.000	1.000
911	1.370	0.967	2.137	100	329.730	331.081	161.565	0.676	3.000	0.333	1.000
912	11.870	0.430	7.554	100	47.297	333.784	10.305	2.703	2.799	0.357	0.712
913	0.457	1.000	0.956	100	133.108	331.757	135.000	0.676	1.000	1.000	1.000
914	5.935	0.646	4.919	100	685.811	333.784	15.945	2.027	2.312	0.433	0.788
915	3.652	0.463	4.872	100	850.676	335.135	33.690	1.816	3.658	0.273	0.615
916	882.944	0.115	70.468	98.656	113.514	334.459	104.436	43.738	1.803	0.555	0.464
917	0.457	1.000	0.956	100	325.676	333.784	135.000	0.676	1.000	1.000	1.000
918	30.588	0.277	16.454	100	629.054	349.324	70.821	3.580	6.183	0.162	0.691
919	9.587	0.500	7.183	100	722.297	338.514	41.186	2.814	3.223	0.310	0.700
920	0.457	1.000	0.956	100	134.459	334.459	135.000	0.676	1.000	1.000	1.000
921	0.457	1.000	0.956	100	329.054	334.459	135.000	0.676	1.000	1.000	1.000
922	0.457	1.000	0.956	100	134.459	335.811	135.000	0.676	1.000	1.000	1.000
923	0.913	1.000	1.511	100	832.432	335.811	153.435	0.676	2.000	0.500	1.000
924	1.826	0.857	2.137	100	1108.108	335.811	108.435	1.351	1.468	0.681	0.800
925	0.913	1.000	1.511	100	220.270	336.486	153.435	0.676	2.000	0.500	1.000
926	2.739	1.000	2.436	100	400.000	336.486	123.690	1.351	1.500	0.667	1.000
927	1.826	0.740	2.786	100	834.459	336.486	165.964	0.676	4.000	0.250	1.000
928	2.283	1.000	2.436	100	1050.676	336.486	146.310	1.351	1.553	0.644	0.909
929	0.457	1.000	0.956	100	325.000	337.162	135.000	0.676	1.000	1.000	1.000
930	87.199	0.372	20.727	98.429	85.135	339.865	160.974	8.178	2.904	0.344	0.736
931	4.565	0.887	3.639	100	81.081	338.514	158.199	2.027	1.690	0.592	0.833
932	1.826	0.857	2.436	100	720.270	340.541	56.310	1.351	2.031	0.492	0.800
933	0.913	1.000	1.511	100	400.000	339.865	153.435	0.676	2.000	0.500	1.000
934	0.457	1.000	0.956	100	924.324	340.541	135.000	0.676	1.000	1.000	1.000
935	0.457	1.000	0.956	100	545.946	341.216	135.000	0.676	1.000	1.000	1.000
936	0.457	1.000	0.956	100	37.838	341.892	135.000	0.676	1.000	1.000	1.000
937	2.283	1.000	2.436	100	212.838	341.892	146.310	1.351	1.553	0.644	0.909
938	0.457	1.000	0.956	100	924.324	341.892	135.000	0.676	1.000	1.000	1.000
939	0.913	1.000	1.511	100	343.919	342.568	153.435	0.676	2.000	0.500	1.000
940	0.913	1.000	1.511	100	327.027	343.243	153.435	0.676	2.000	0.500	1.000
941	0.457	1.000	0.956	100	400.000	343.243	135.000	0.676	1.000	1.000	1.000
942	4.109	0.539	4.533	100	448.649	347.297	63.435	2.027	2.663	0.375	0.692
943	3.652	0.567	3.639	100	1059.459	343.919	158.199	2.254	1.842	0.543	0.593
944	6.848	0.308	6.229	100	343.243	344.595	167.471	2.027	2.815	0.355	0.652
945	119.156	0.640	18.193	100	663.514	353.378	31.329	11.641	1.425	0.702	0.871
946	0.457	1.000	0.956	100	1052.027	343.919	135.000	0.676	1.000	1.000	1.000
947	2.283	0.513	3.378	100	329.054	344.595	126.870	1.690	2.605	0.384	0.588
948	11.413	0.566	5.812	100	458.108	350.000	54.462	3.187	2.033	0.492	0.769
949	5.478	0.967	3.822	100	708.108	347.973	45.000	2.703	1.419	0.705	0.889
950	0.457	1.000	0.956	100	64.865	345.946	135.000	0.676	1.000	1.000	1.000
951	4.109	1.000	2.867	100	214.189	345.946	135.000	2.027	1.000	1.000	1.000
952	6.392	0.993	3.639	100	645.270	345.946	111.801	2.703	1.437	0.696	0.824
953	0.913	0.785	1.911	100	1143.243	347.297	45.000	0.956	2.646	0.378	0.667
954	0.457	1.000	0.956	100	249.324	346.622	135.000	0.676	1.000	1.000	1.000
955	11.413	0.641	6.655	100	77.703	350.000	23.962	3.325	2.300	0.435	0.769
956	0.457	1.000	0.956	100	513.514	347.297	135.000	0.676	1.000	1.000	1.000
957	18.718	0.458	9.065	100	651.351	347.297	153.435	3.438	2.962	0.338	0.759
958	42.915	0.334	16.892	100	695.270	360.811	53.130	5.037	4.965	0.201	0.648
959	0.457	1.000	0.956	100	1055.405	347.297	135.000	0.676	1.000	1.000	1.000
960	0.457	1.000	0.956	100	1102.027	347.297	135.000	0.676	1.000	1.000	1.000
961	1.826	1.000	2.137	100	214.189	349.324	161.565	1.351	1.468	0.681	0.800
962	0.457	1.000	0.956	100	251.351	348.649	135.000	0.676	1.000	1.000	1.000
963	5.935	0.779	4.273	100	816.216	348.649	108.435	2.027	2.521	0.397	0.839
964	4.109	0.832	3.639	100	1127.027	348.649	111.801	1.351	2.386	0.419	0.947
965	0.457	1.000	0.956	100	510.135	349.324	135.000	0.676	1.000	1.000	1.000
966	1.370	0.809	2.137	100	918.919	349.324	108.435	0.676	3.000	0.333	1.000
967	4.109	0.638	3.940	100	927.027	349.324	120.964	2.063	2.478	0.404	0.667
968	1.370	0.967	2.137	100	68.243	350.676	161.565	0.676	3.000	0.333	1.000
969	2.283	0.674	3.022	100	629.054	353.378	63.435	1.351	2.610	0.383	0.769
970	2.283	0.764	2.786	100	339.189	352.027	165.964	1.351	2.188	0.457	0.769
971	1.370	0.967	2.137	100	408.784	351.351	161.565	0.676	3.000	0.333	1.000
972	10.044	0.311	6.757	100	445.946	356.081	36.870	3.754	2.096	0.477	0.524
973	0.457	1.000	0.956	100	644.595	351.351	135.000	0.676	1.000	1.000	1.000
974	0.457	1.000	0.956	100	653.378	351.351	135.000	0.676	1.000	1.000	1.000
975	0.457	1.000	0.956	100	59.459	352.027	135.000	0.676	1.000	1.000	1.000
976	0.913	1.000	1.511	100	396.622	352.027	153.435	0.676	2.000	0.500	1.000
977	24.653	0.380	12.459	100	830.405	361.486	49.399	4.300	4.278	0.234	0.587
978	0.913	1.000	1.511	100	338.514	353.378	153.435	0.676	2.000	0.500	1.000
979	6.848	0.537	4.872	100	929.730	354.054	123.690	3.129	1.886	0.530	0.638
980	10.957	0.181	13.378	100	243.243	355.405	135.000	2.122	9.874	0.101	0.475
981	1.826	1.000	1.911	100	645.270	355.405	135.000	1.351	1.000	1.000	1.000
982	0.913	1.000	1.511	100	828.378	355.405	116.565	0.676	2.000	0.500	1.000
983	0.913	1.000	1.511	100	1133.784	355.405	153.435	0.676	2.000	0.500	1.000
984	5.478	0.967	3.639	100	81.081	356.081	158.199	2.027	1.610	0.621	0.889
985	0.457	1.000	0.956	100	48.649	356.757	135.000	0.676	1.000	1.000	1.000
986	5.022	0.780	4.326	100	1044.595	356.757	128.660	2.254	2.299	0.435	0.759
987	7.761	0.385	5.572	100	1131.757	359.459	14.036	2.703	2.177	0.459	0.642
988	1.826	1.000	2.137	100	448.649	358.108	161.565	1.351	1.468	0.681	0.800
989	10.044	0.788	5.447	100	644.595	357.432	150.255	2.703	1.782	0.561	0.880
990	1.370	0.809	2.137	100	945.270	357.432	108.435	0.676	3.000	0.333	1.000
991	1.370	1.000	1.911	100	50.000	358.784	135.000	1.351	1.464	0.683	0.857
992	0.457	1.000	0.956	100	826.351	358.784	135.000	0.676	1.000	1.000	1.000
993	0.913	1.000	1.511	100	954.054	358.784	116.565	0.676	2.000	0.500	1.000
994	0.457	1.000	0.956	100	56.081	360.135	135.000	0.676	1.000	1.000	1.000
995	2.283	1.000	2.436	100	1072.297	361.486	33.690	1.351	1.553	0.644	0.909
996	0.457	1.000	0.956	100	343.919	360.811	135.000	0.676	1.000	1.000	1.000
997	140.157	0.321	22.461	98.697	448.649	360.811	111.161	11.486	2.202	0.454	0.729
998	0.913	1.000	1.511	100	952.703	360.811	153.435	0.676	2.000	0.500	1.000
999	10.044	0.609	5.773	100	956.081	366.216	69.444	3.115	2.398	0.417	0.710
1000	1.826	0.740	2.786	100	1075.676	360.811	165.964	0.676	4.000	0.250	1.000
1001	1.826	0.611	3.022	100	53.378	361.486	153.435	1.284	3.093	0.323	0.667
1002	0.457	1.000	0.956	100	61.486	361.486	135.000	0.676	1.000	1.000	1.000
1003	6.392	0.489	6.229	100	690.541	365.541	40.601	1.911	4.080	0.245	0.651
1004	0.457	1.000	0.956	100	62.838	362.162	135.000	0.676	1.000	1.000	1.000
1005	1.370	0.809	2.137	100	335.135	362.162	108.435	0.676	3.000	0.333	1.000
1006	0.457	1.000	0.956	100	816.216	362.162	135.000	0.676	1.000	1.000	1.000
1007	15.979	0.605	7.554	100	339.189	365.541	10.305	4.054	2.086	0.479	0.737
1008	0.913	1.000	1.511	100	669.595	362.838	153.435	0.676	2.000	0.500	1.000
1009	10.957	0.208	11.819	100	852.027	363.514	149.036	2.522	7.125	0.140	0.449
1010	0.457	1.000	0.956	100	55.405	364.189	135.000	0.676	1.000	1.000	1.000
1011	13.240	0.263	8.220	100	442.568	372.297	80.538	5.308	1.835	0.545	0.475
1012	1.826	1.000	1.911	100	445.946	364.189	135.000	1.351	1.000	1.000	1.000
1013	5.022	0.637	3.940	100	647.297	364.865	149.036	2.703	1.537	0.651	0.688
1014	2.283	0.513	3.639	100	654.054	365.541	21.801	1.284	4.051	0.247	0.667
1015	1.826	1.000	1.911	100	667.568	364.189	135.000	1.351	1.000	1.000	1.000
1016	0.457	1.000	0.956	100	1113.514	364.189	135.000	0.676	1.000	1.000	1.000
1017	14.609	0.198	13.598	100	329.054	364.865	116.565	4.230	4.372	0.229	0.393
1018	2.283	0.764	3.022	100	1050.000	364.865	153.435	1.351	2.610	0.383	0.769
1019	3.652	0.567	4.326	100	54.054	365.541	128.660	1.911	2.928	0.342	0.640
1020	0.913	1.000	1.511	100	87.162	365.541	153.435	0.676	2.000	0.500	1.000
1021	1.826	0.857	2.436	100	335.135	365.541	146.310	1.351	2.000	0.500	0.800
1022	0.913	1.000	1.511	100	568.243	365.541	116.565	0.676	2.000	0.500	1.000
1023	0.457	1.000	0.956	100	1111.486	365.541	135.000	0.676	1.000	1.000	1.000
1024	3.196	1.000	2.436	100	1125.676	365.541	123.690	2.027	1.069	0.936	0.875
1025	0.913	1.000	1.511	100	32.432	366.216	116.565	0.676	2.000	0.500	1.000
1026	0.457	1.000	0.956	100	351.351	366.216	135.000	0.676	1.000	1.000	1.000
1027	0.457	1.000	0.956	100	567.568	367.568	135.000	0.676	1.000	1.000	1.000
1028	0.457	1.000	0.956	100	837.838	367.568	135.000	0.676	1.000	1.000	1.000
1029	0.457	1.000	0.956	100	33.784	368.243	135.000	0.676	1.000	1.000	1.000
1030	0.457	1.000	0.956	100	1029.730	368.243	135.000	0.676	1.000	1.000	1.000
1031	4.109	0.416	4.110	100	57.432	368.919	170.538	2.703	1.368	0.731	0.545
1032	0.913	1.000	1.511	100	614.189	368.919	116.565	0.676	2.000	0.500	1.000
1033	0.457	1.000	0.956	100	1014.865	368.919	135.000	0.676	1.000	1.000	1.000
1034	1.370	0.967	2.137	100	1016.216	368.919	161.565	0.676	3.000	0.333	1.000
1035	0.913	1.000	1.511	100	5.405	369.595	153.435	0.676	2.000	0.500	1.000
1036	1.826	1.000	2.436	100	1012.162	370.946	33.690	1.351	2.031	0.492	0.800
1037	0.913	1.000	1.511	100	335.135	370.270	153.435	0.676	2.000	0.500	1.000
1038	0.457	1.000	0.956	100	50.000	371.622	135.000	0.676	1.000	1.000	1.000
1039	4.109	0.638	4.326	100	345.946	374.324	38.660	1.911	2.977	0.336	0.692
1040	4.565	0.674	4.273	100	954.054	375.676	71.565	1.351	2.953	0.339	0.909
1041	0.457	1.000	0.956	100	975.676	371.622	135.000	0.676	1.000	1.000	1.000
1042	0.457	1.000	0.956	100	64.189	372.297	135.000	0.676	1.000	1.000	1.000
1043	16.435	0.286	10.336	100	69.595	375.676	11.310	3.063	4.206	0.238	0.655
1044	23.283	0.307	12.568	100	781.757	380.405	36.254	3.901	4.628	0.216	0.545
1045	15.979	0.339	8.358	97.143	956.757	372.297	104.036	4.730	2.228	0.449	0.593
1046	1.370	0.967	2.137	100	1021.622	372.297	161.565	0.676	3.000	0.333	1.000
1047	1.826	0.698	2.867	100	50.676	372.973	135.000	1.433	2.654	0.377	0.667
1048	1.370	0.967	2.137	100	93.243	372.973	161.565	0.676	3.000	0.333	1.000
1049	8.218	0.408	6.891	88.889	1005.405	375.676	11.310	2.703	2.840	0.352	0.643
1050	3.652	0.914	3.378	100	64.189	373.649	143.130	1.925	1.989	0.503	0.800
1051	0.457	1.000	0.956	100	151.351	373.649	135.000	0.676	1.000	1.000	1.000
1052	5.022	0.637	3.940	100	441.216	375.000	149.036	2.627	1.810	0.552	0.710
1053	2.739	0.686	3.378	100	794.595	376.351	36.870	1.513	2.778	0.360	0.706
1054	0.457	1.000	0.956	100	590.541	375.000	135.000	0.676	1.000	1.000	1.000
1055	0.457	1.000	0.956	100	981.757	376.351	135.000	0.676	1.000	1.000	1.000
1056	1.370	0.967	2.137	100	1002.027	376.351	161.565	0.676	3.000	0.333	1.000
1057	1.370	0.967	2.137	100	1004.730	376.351	161.565	0.676	3.000	0.333	1.000
1058	0.457	1.000	0.956	100	340.541	377.027	135.000	0.676	1.000	1.000	1.000
1059	0.457	1.000	0.956	100	793.919	377.027	135.000	0.676	1.000	1.000	1.000
1060	5.478	0.308	6.655	100	983.784	377.027	156.038	2.230	3.696	0.271	0.500
1061	0.457	1.000	0.956	100	1000.676	377.027	135.000	0.676	1.000	1.000	1.000
1062	12.327	0.611	6.229	100	86.486	377.703	130.601	4.130	1.505	0.665	0.701
1063	4.565	0.536	4.326	100	1053.378	381.081	38.660	2.867	1.551	0.645	0.606
1064	0.457	1.000	0.956	100	95.270	378.378	135.000	0.676	1.000	1.000	1.000
1065	0.457	1.000	0.956	100	235.811	378.378	135.000	0.676	1.000	1.000	1.000
1066	5.935	1.000	3.639	100	94.595	379.730	158.199	2.027	1.622	0.617	0.929
1067	0.457	1.000	0.956	100	151.351	379.730	135.000	0.676	1.000	1.000	1.000
1068	1.370	0.967	2.137	100	268.243	379.730	161.565	0.676	3.000	0.333	1.000
1069	0.913	1.000	1.511	100	845.946	379.730	153.435	0.676	2.000	0.500	1.000
1070	0.457	1.000	0.956	100	235.811	380.405	135.000	0.676	1.000	1.000	1.000
1071	0.913	1.000	1.511	100	158.784	381.081	153.435	0.676	2.000	0.500	1.000
1072	0.913	1.000	1.511	100	183.784	381.757	153.435	0.676	2.000	0.500	1.000
1073	1.370	0.967	2.137	100	237.838	381.757	161.565	0.676	3.000	0.333	1.000
1074	2.739	0.686	3.378	100	191.892	382.432	143.130	1.814	2.464	0.406	0.667
1075	0.913	1.000	1.511	100	446.622	382.432	116.565	0.676	2.000	0.500	1.000
1076	0.457	1.000	0.956	100	237.162	383.108	135.000	0.676	1.000	1.000	1.000
1077	0.457	1.000	0.956	100	238.514	383.108	135.000	0.676	1.000	1.000	1.000
1078	0.913	1.000	1.511	100	571.622	383.108	153.435	0.676	2.000	0.500	1.000
1079	0.457	1.000	0.956	100	1131.081	383.108	135.000	0.676	1.000	1.000	1.000
1080	9.131	0.674	5.773	100	593.243	385.811	20.556	2.703	2.117	0.472	0.784
1081	0.457	1.000	0.956	100	641.216	383.784	135.000	0.676	1.000	1.000	1.000
1082	0.457	1.000	0.956	100	1027.027	383.784	135.000	0.676	1.000	1.000	1.000
1083	0.457	1.000	0.956	100	1070.270	383.784	135.000	0.676	1.000	1.000	1.000
1084	1.370	0.967	2.137	100	1029.730	384.459	161.565	0.676	3.000	0.333	1.000
1085	3.652	0.479	4.273	100	1031.081	385.811	161.565	1.967	2.340	0.427	0.615
1086	6.392	0.647	5.146	100	490.541	385.811	113.199	2.027	2.985	0.335	0.824
1087	1.370	0.967	2.137	100	564.189	385.811	161.565	0.676	3.000	0.333	1.000
1088	0.457	1.000	0.956	100	1075.000	385.811	135.000	0.676	1.000	1.000	1.000
1089	0.457	1.000	0.956	100	1000.000	386.486	135.000	0.676	1.000	1.000	1.000
1090	2.739	0.809	3.022	100	1004.054	386.486	153.435	1.351	2.237	0.447	0.857
1091	1.370	1.000	1.911	100	562.162	388.514	45.000	1.351	1.464	0.683	0.857
1092	10.500	0.824	5.277	100	581.081	390.541	39.806	3.206	1.758	0.569	0.836
1093	0.457	1.000	0.956	100	270.270	387.838	135.000	0.676	1.000	1.000	1.000
1094	1.370	0.967	2.137	100	111.486	388.514	161.565	0.676	3.000	0.333	1.000
1095	31.045	0.385	12.568	100	320.270	398.649	53.746	5.524	2.224	0.450	0.624
1096	0.457	1.000	0.956	100	1090.541	388.514	135.000	0.676	1.000	1.000	1.000
1097	0.913	1.000	1.511	100	1092.568	388.514	153.435	0.676	2.000	0.500	1.000
1098	3.196	0.472	4.273	100	195.946	393.243	71.565	1.351	3.946	0.253	0.737
1099	0.913	1.000	1.511	100	270.270	389.189	116.565	0.676	2.000	0.500	1.000
1100	1.370	0.643	2.436	100	799.324	391.216	56.310	1.209	2.702	0.370	0.667
1101	0.913	1.000	1.511	100	1037.838	389.189	153.435	0.676	2.000	0.500	1.000
1102	0.913	1.000	1.511	100	1133.108	389.189	153.435	0.676	2.000	0.500	1.000
1103	1.826	1.000	1.911	100	1099.324	391.216	135.000	1.351	1.000	1.000	1.000
1104	3.652	1.000	3.022	100	381.081	391.892	116.565	1.351	2.000	0.500	1.000
1105	0.457	1.000	0.956	100	679.054	393.243	135.000	0.676	1.000	1.000	1.000
1106	5.022	0.494	4.872	100	188.514	397.297	33.690	2.319	2.644	0.378	0.595
1107	5.022	0.609	4.919	100	302.703	395.270	15.945	1.351	3.615	0.277	0.880
1108	0.913	1.000	1.511	100	308.108	393.919	153.435	0.676	2.000	0.500	1.000
1109	1.370	1.000	1.911	100	102.703	395.946	45.000	1.351	1.464	0.683	0.857
1110	0.913	1.000	1.511	100	297.297	394.595	153.435	0.676	2.000	0.500	1.000
1111	1.826	1.000	2.436	100	805.405	395.946	33.690	1.351	2.031	0.492	0.800
1112	0.457	1.000	0.956	100	1129.054	394.595	135.000	0.676	1.000	1.000	1.000
1113	1.370	1.000	1.911	100	193.243	395.270	135.000	1.351	1.464	0.683	0.857
1114	0.913	1.000	1.511	100	920.946	396.622	153.435	0.676	2.000	0.500	1.000
1115	0.457	1.000	0.956	100	1054.054	396.622	135.000	0.676	1.000	1.000	1.000
1116	0.457	1.000	0.956	100	291.216	397.297	135.000	0.676	1.000	1.000	1.000
1117	0.457	1.000	0.956	100	832.432	397.297	135.000	0.676	1.000	1.000	1.000
1118	11.413	0.692	6.410	100	115.541	404.730	71.565	2.676	2.701	0.370	0.833
1119	3.652	0.463	4.533	100	934.459	400.676	26.565	1.925	2.915	0.343	0.615
1120	0.913	1.000	1.511	100	806.757	399.324	153.435	0.676	2.000	0.500	1.000
1121	7.761	0.559	6.043	100	775.676	402.703	26.565	2.780	2.732	0.366	0.680
1122	0.913	1.000	1.511	100	745.946	400.676	153.435	0.676	2.000	0.500	1.000
1123	1.370	1.000	1.911	100	806.081	402.027	45.000	1.351	1.464	0.683	0.857
1124	0.457	1.000	0.956	100	951.351	400.676	135.000	0.676	1.000	1.000	1.000
1125	0.913	1.000	1.511	100	236.486	401.351	153.435	0.676	2.000	0.500	1.000
1126	141.983	0.362	24.789	100	767.568	425.676	72.553	10.961	2.703	0.370	0.746
1127	0.457	1.000	0.956	100	215.541	404.730	135.000	0.676	1.000	1.000	1.000
1128	44.284	0.489	12.181	98.969	380.405	416.216	70.560	7.695	1.705	0.586	0.749
1129	0.457	1.000	0.956	100	116.216	405.405	135.000	0.676	1.000	1.000	1.000
1130	0.457	1.000	0.956	100	129.730	405.405	135.000	0.676	1.000	1.000	1.000
1131	31.501	0.335	13.119	100	166.892	410.811	11.889	4.847	3.434	0.291	0.608
1132	1.370	1.000	1.911	100	475.676	406.081	135.000	1.351	1.464	0.683	0.857
1133	0.457	1.000	0.956	100	491.892	406.081	135.000	0.676	1.000	1.000	1.000
1134	5.478	0.292	5.572	100	1126.351	408.108	14.036	2.459	2.701	0.370	0.533
1135	1.826	1.000	1.911	100	117.568	406.757	135.000	1.351	1.000	1.000	1.000
1136	0.457	1.000	0.956	100	291.892	407.432	135.000	0.676	1.000	1.000	1.000
1137	1.826	1.000	2.436	100	129.730	408.108	146.310	1.351	2.031	0.492	0.800
1138	0.913	1.000	1.511	100	1129.730	408.108	153.435	0.676	2.000	0.500	1.000
1139	0.913	1.000	1.511	100	1129.730	409.459	153.435	0.676	2.000	0.500	1.000
1140	6.848	0.588	5.146	100	131.081	410.135	113.199	2.027	2.946	0.339	0.789
1141	0.457	1.000	0.956	100	286.486	410.135	135.000	0.676	1.000	1.000	1.000
1142	0.913	1.000	1.511	100	295.946	410.135	153.435	0.676	2.000	0.500	1.000
1143	9.131	0.994	4.533	100	429.730	410.811	153.435	2.703	1.500	0.667	0.909
1144	5.478	0.539	5.146	100	545.270	412.162	23.199	2.132	2.846	0.351	0.649
1145	0.457	1.000	0.956	100	454.054	410.811	135.000	0.676	1.000	1.000	1.000
1146	0.457	1.000	0.956	100	935.135	410.811	135.000	0.676	1.000	1.000	1.000
1147	0.913	1.000	1.511	100	97.297	411.486	116.565	0.676	2.000	0.500	1.000
1148	2.283	1.000	2.436	100	813.514	411.486	146.310	1.351	1.553	0.644	0.909
1149	1.826	0.611	3.022	100	80.405	413.514	26.565	1.284	3.093	0.323	0.667
1150	0.457	1.000	0.956	100	297.297	412.162	135.000	0.676	1.000	1.000	1.000
1151	0.913	1.000	1.511	100	1113.514	412.162	116.565	0.676	2.000	0.500	1.000
1152	0.457	1.000	0.956	100	640.541	412.838	135.000	0.676	1.000	1.000	1.000
1153	0.913	1.000	1.511	100	272.297	413.514	153.435	0.676	2.000	0.500	1.000
1154	11.870	0.478	8.164	100	416.216	416.892	24.444	2.568	4.180	0.239	0.732
1155	1.370	1.000	1.911	100	835.135	414.865	45.000	1.351	1.464	0.683	0.857
1156	0.913	1.000	1.511	100	988.514	413.514	153.435	0.676	2.000	0.500	1.000
1157	248.813	0.392	26.730	99.633	1097.297	423.649	159.274	19.622	1.486	0.673	0.653
1158	0.457	1.000	0.956	100	641.216	414.189	135.000	0.676	1.000	1.000	1.000
1159	1.826	1.000	2.436	100	812.162	415.541	33.690	1.351	2.031	0.492	0.800
1160	5.478	0.314	6.891	100	867.568	414.189	168.690	1.351	5.832	0.171	0.706
1161	3.196	0.455	4.110	100	304.054	415.541	170.538	1.351	2.955	0.338	0.667
1162	5.478	0.664	4.273	100	540.541	415.541	161.565	2.027	2.471	0.405	0.800
1163	62.089	0.324	16.018	100	1114.189	429.054	62.354	8.289	2.674	0.374	0.591
1164	0.457	1.000	0.956	100	133.108	415.541	135.000	0.676	1.000	1.000	1.000
1165	604.912	0.198	49.366	99.396	150.000	421.622	149.574	27.083	1.841	0.543	0.622
1166	2.739	0.769	3.378	100	170.270	417.568	36.870	1.710	2.391	0.418	0.706
1167	0.913	1.000	1.511	100	462.162	415.541	153.435	0.676	2.000	0.500	1.000
1168	5.022	0.809	3.940	100	464.865	415.541	149.036	2.027	2.215	0.451	0.846
1169	0.457	1.000	0.956	100	640.541	415.541	135.000	0.676	1.000	1.000	1.000
1170	0.913	1.000	1.511	100	810.135	415.541	153.435	0.676	2.000	0.500	1.000
1171	0.913	1.000	1.511	100	97.297	416.216	116.565	0.676	2.000	0.500	1.000
1172	26.936	0.528	7.880	100	391.216	416.216	120.964	6.081	1.336	0.749	0.797
1173	3.196	0.943	3.022	100	829.730	416.216	116.565	1.351	1.936	0.517	0.933
1174	0.913	1.000	1.511	100	1000.000	416.216	116.565	0.676	2.000	0.500	1.000
1175	0.457	1.000	0.956	100	1005.405	416.216	135.000	0.676	1.000	1.000	1.000
1176	0.913	1.000	1.511	100	987.162	416.892	153.435	0.676	2.000	0.500	1.000
1177	0.913	1.000	1.511	100	1008.108	416.892	116.565	0.676	2.000	0.500	1.000
1178	0.457	1.000	0.956	100	639.865	417.568	135.000	0.676	1.000	1.000	1.000
1179	3.652	0.539	4.273	100	404.730	419.595	18.435	1.351	3.759	0.266	0.800
1180	24.196	0.575	8.547	100	432.432	422.297	18.435	5.256	1.596	0.626	0.711
1181	2.283	0.513	3.639	100	633.108	418.243	158.199	1.284	4.051	0.247	0.667
1182	1.370	0.967	2.137	100	637.162	418.243	161.565	0.676	3.000	0.333	1.000
1183	0.457	1.000	0.956	100	1113.514	418.919	135.000	0.676	1.000	1.000	1.000
1184	2.283	0.873	2.867	100	875.676	419.595	135.000	1.513	2.188	0.457	0.714
1185	5.478	0.539	4.872	100	918.919	422.297	33.690	2.256	2.509	0.399	0.686
1186	0.913	1.000	1.511	100	1005.405	419.595	153.435	0.676	2.000	0.500	1.000
1187	1.826	0.740	2.786	100	797.973	420.270	165.964	0.676	4.000	0.250	1.000
1188	4.109	0.447	4.110	100	1137.162	421.622	170.538	2.027	2.133	0.469	0.692
1189	0.913	1.000	1.511	100	147.973	420.946	153.435	0.676	2.000	0.500	1.000
1190	0.457	1.000	0.956	100	264.865	420.946	135.000	0.676	1.000	1.000	1.000
1191	0.913	1.000	1.511	100	794.595	421.622	153.435	0.676	2.000	0.500	1.000
1192	1.370	1.000	1.911	100	832.432	421.622	135.000	1.351	1.464	0.683	0.857
1193	1.370	0.524	2.867	100	1124.324	424.324	45.000	0.956	4.123	0.243	0.600
1194	0.457	1.000	0.956	100	139.865	422.973	135.000	0.676	1.000	1.000	1.000
1195	15.979	0.288	12.568	100	421.622	431.081	36.254	2.651	6.993	0.143	0.609
1196	2.283	0.599	3.445	100	824.324	424.324	168.690	0.676	5.000	0.200	1.000
1197	0.913	1.000	1.511	100	789.189	425.000	116.565	0.676	2.000	0.500	1.000
1198	0.913	1.000	1.511	100	481.081	425.676	153.435	0.676	2.000	0.500	1.000
1199	0.457	1.000	0.956	100	824.324	425.676	135.000	0.676	1.000	1.000	1.000
1200	1.826	1.000	1.911	100	675.676	426.351	135.000	1.351	1.000	1.000	1.000
1201	0.457	1.000	0.956	100	810.811	427.027	135.000	0.676	1.000	1.000	1.000
1202	0.457	1.000	0.956	100	58.784	427.703	135.000	0.676	1.000	1.000	1.000
1203	0.457	1.000	0.956	100	248.649	427.703	135.000	0.676	1.000	1.000	1.000
1204	1.370	0.809	2.137	100	264.865	429.054	108.435	0.676	3.000	0.333	1.000
1205	47.480	0.281	15.002	100	395.946	429.054	144.162	8.415	2.300	0.435	0.596
1206	0.913	1.000	1.511	100	491.892	429.730	116.565	0.676	2.000	0.500	1.000
1207	0.457	1.000	0.956	100	677.027	429.730	135.000	0.676	1.000	1.000	1.000
1208	0.457	1.000	0.956	100	75.676	430.405	135.000	0.676	1.000	1.000	1.000
1209	2.739	0.532	3.940	100	533.108	430.405	149.036	1.690	3.208	0.312	0.600
1210	0.913	1.000	1.511	100	834.459	430.405	153.435	0.676	2.000	0.500	1.000
1211	0.457	1.000	0.956	100	221.622	431.081	135.000	0.676	1.000	1.000	1.000
1212	32.871	0.221	19.218	100	677.703	431.081	100.125	3.695	7.028	0.142	0.618
1213	0.457	1.000	0.956	100	493.919	431.757	135.000	0.676	1.000	1.000	1.000
1214	8.218	0.755	5.146	100	520.946	436.486	66.801	2.703	2.188	0.457	0.800
1215	0.457	1.000	0.956	100	481.081	432.432	135.000	0.676	1.000	1.000	1.000
1216	1.826	0.740	2.786	100	524.324	432.432	165.964	0.676	4.000	0.250	1.000
1217	1.370	0.967	2.137	100	555.405	434.459	161.565	0.676	3.000	0.333	1.000
1218	9.587	0.356	8.466	100	497.297	435.135	151.390	2.639	4.024	0.248	0.592
1219	0.913	1.000	1.511	100	754.054	435.135	116.565	0.676	2.000	0.500	1.000
1220	0.457	1.000	0.956	100	841.216	435.135	135.000	0.676	1.000	1.000	1.000
1221	41.088	0.412	15.109	100	883.108	436.486	169.695	4.054	3.302	0.303	0.833
1222	1.826	0.857	2.436	100	2.027	436.486	146.310	1.351	2.000	0.500	0.800
1223	1.370	0.754	2.436	100	518.243	438.514	33.690	1.209	2.702	0.370	0.667
1224	0.457	1.000	0.956	100	839.189	437.162	135.000	0.676	1.000	1.000	1.000
1225	2.739	1.000	2.867	100	883.108	437.838	135.000	1.814	1.809	0.553	0.800
1226	1.370	1.000	1.911	100	367.568	438.514	135.000	1.351	1.464	0.683	0.857
1227	0.457	1.000	0.956	100	410.811	439.189	135.000	0.676	1.000	1.000	1.000
1228	2.739	0.503	4.110	100	505.405	439.189	170.538	0.676	6.000	0.167	1.000
1229	0.457	1.000	0.956	100	5.405	439.865	135.000	0.676	1.000	1.000	1.000
1230	0.457	1.000	0.956	100	556.757	439.865	135.000	0.676	1.000	1.000	1.000
1231	2.283	0.513	3.639	100	208.784	441.892	21.801	1.284	4.051	0.247	0.667
1232	3.196	0.943	3.022	100	395.946	443.243	63.435	1.351	1.936	0.517	0.933
1233	0.913	1.000	1.511	100	412.162	440.541	153.435	0.676	2.000	0.500	1.000
1234	0.457	1.000	0.956	100	134.459	441.216	135.000	0.676	1.000	1.000	1.000
1235	2.283	1.000	2.436	100	558.108	441.216	146.310	1.351	1.553	0.644	0.909
1236	60.720	0.529	15.289	97.744	921.622	441.216	135.000	8.050	1.925	0.519	0.780
1237	1.370	0.967	2.137	100	1008.784	441.216	161.565	0.676	3.000	0.333	1.000
1238	2.283	1.000	2.436	100	368.919	443.243	33.690	1.351	1.553	0.644	0.909
1239	1.826	1.000	2.436	100	204.730	443.919	33.690	1.351	2.000	0.500	0.800
1240	0.457	1.000	0.956	100	769.595	442.568	135.000	0.676	1.000	1.000	1.000
1241	0.457	1.000	0.956	100	854.054	442.568	135.000	0.676	1.000	1.000	1.000
1242	12.783	0.361	6.655	100	1099.324	447.297	23.962	4.730	1.416	0.706	0.589
1243	2.283	1.000	2.436	100	488.514	444.595	33.690	1.351	1.553	0.644	0.909
1244	0.457	1.000	0.956	100	827.027	443.243	135.000	0.676	1.000	1.000	1.000
1245	0.457	1.000	0.956	100	225.000	443.919	135.000	0.676	1.000	1.000	1.000
1246	0.913	1.000	1.511	100	627.027	443.919	153.435	0.676	2.000	0.500	1.000
1247	0.913	1.000	1.511	100	437.838	445.270	153.435	0.676	2.000	0.500	1.000
1248	3.196	1.000	3.022	100	265.541	447.297	26.565	1.351	1.936	0.517	0.933
1249	0.457	1.000	0.956	100	335.135	445.946	135.000	0.676	1.000	1.000	1.000
1250	2.739	0.686	3.378	100	484.459	448.649	53.130	1.690	2.519	0.397	0.706
1251	0.457	1.000	0.956	100	983.784	447.297	135.000	0.676	1.000	1.000	1.000
1252	0.457	1.000	0.956	100	266.216	447.973	135.000	0.676	1.000	1.000	1.000
1253	1.370	0.967	2.137	100	471.622	447.973	161.565	0.676	3.000	0.333	1.000
1254	1.370	0.967	2.137	100	475.000	448.649	161.565	0.676	3.000	0.333	1.000
1255	1.370	1.000	1.911	100	1115.541	452.027	135.000	1.351	1.464	0.683	0.857
1256	0.913	1.000	1.511	100	229.730	452.703	153.435	0.676	2.000	0.500	1.000
1257	26.936	0.869	7.054	100	866.892	456.081	163.301	5.744	1.173	0.853	0.868
1258	4.109	0.884	3.022	100	931.081	454.730	26.565	2.389	1.158	0.864	0.750
1259	0.457	1.000	0.956	100	140.541	454.054	135.000	0.676	1.000	1.000	1.000
1260	0.913	1.000	1.511	100	441.892	454.054	153.435	0.676	2.000	0.500	1.000
1261	0.913	1.000	1.511	100	475.000	454.054	153.435	0.676	2.000	0.500	1.000
1262	15.522	0.232	8.358	100	1097.297	456.081	14.036	4.730	1.543	0.648	0.548
1263	0.457	1.000	0.956	100	1116.216	454.054	135.000	0.676	1.000	1.000	1.000
1264	2.283	1.000	2.436	100	1113.514	454.730	146.310	1.351	1.553	0.644	0.909
1265	11.413	0.421	8.164	100	925.676	459.459	24.444	3.115	3.055	0.327	0.658
1266	4.109	0.884	3.378	100	165.541	459.459	36.870	2.254	1.679	0.596	0.750
1267	1.826	0.857	2.436	100	682.432	457.432	123.690	1.351	2.000	0.500	0.800
1268	0.913	1.000	1.511	100	666.216	458.108	153.435	0.676	2.000	0.500	1.000
1269	5.935	0.413	6.229	100	214.189	458.784	167.471	2.002	3.365	0.297	0.650
1270	6.848	0.439	5.146	100	860.135	461.486	23.199	3.015	2.066	0.484	0.600
1271	5.022	0.780	3.940	100	1027.027	458.784	120.964	2.565	1.549	0.646	0.733
1272	0.457	1.000	0.956	100	5.405	459.459	135.000	0.676	1.000	1.000	1.000
1273	3.196	0.943	3.022	100	1030.405	459.459	116.565	1.351	1.936	0.517	0.933
1274	8.218	0.629	5.812	100	162.838	464.865	54.462	2.724	2.823	0.354	0.735
1275	2.739	1.000	2.436	100	520.270	460.135	123.690	1.911	1.291	0.775	0.800
1276	8.218	0.232	9.387	100	1032.432	460.135	149.744	2.398	5.995	0.167	0.500
1277	0.457	1.000	0.956	100	1103.378	460.811	135.000	0.676	1.000	1.000	1.000
1278	15.979	0.469	7.880	100	932.432	469.595	59.036	3.906	2.405	0.416	0.673
1279	0.457	1.000	0.956	100	1104.054	462.838	135.000	0.676	1.000	1.000	1.000
1280	4.109	1.000	3.022	100	158.784	465.541	26.565	2.027	1.340	0.746	0.857
1281	0.457	1.000	0.956	100	615.541	464.865	135.000	0.676	1.000	1.000	1.000
1282	0.457	1.000	0.956	100	629.054	464.865	135.000	0.676	1.000	1.000	1.000
1283	0.457	1.000	0.956	100	1107.432	465.541	135.000	0.676	1.000	1.000	1.000
1284	0.913	1.000	1.511	100	471.622	466.216	153.435	0.676	2.000	0.500	1.000
1285	0.457	1.000	0.956	100	778.378	466.892	135.000	0.676	1.000	1.000	1.000
1286	0.913	1.000	1.511	100	1109.459	466.892	153.435	0.676	2.000	0.500	1.000
1287	1.370	1.000	1.911	100	778.378	468.243	135.000	1.351	1.464	0.683	0.857
1288	0.457	1.000	0.956	100	848.649	468.243	135.000	0.676	1.000	1.000	1.000
1289	0.457	1.000	0.956	100	935.135	468.243	135.000	0.676	1.000	1.000	1.000
1290	2.283	1.000	2.436	100	1085.135	469.595	33.690	1.351	1.553	0.644	0.909
1291	3.652	0.914	3.022	100	470.270	471.622	63.435	2.027	1.554	0.644	0.800
1292	2.283	1.000	2.436	100	845.270	468.919	123.690	1.351	1.553	0.644	0.909
1293	221.421	0.227	38.803	94.639	1066.892	477.027	144.926	18.028	2.611	0.383	0.537
1294	9.131	0.414	8.136	100	147.297	475.000	41.634	2.389	4.731	0.211	0.606
1295	1.826	0.645	2.786	100	778.378	470.270	104.036	0.676	4.000	0.250	1.000
1296	220.964	0.687	24.362	100	927.703	490.541	56.310	13.678	1.833	0.546	0.892
1297	0.457	1.000	0.956	100	27.027	471.622	135.000	0.676	1.000	1.000	1.000
1298	0.457	1.000	0.956	100	154.730	471.622	135.000	0.676	1.000	1.000	1.000
1299	2.283	0.513	3.639	100	874.324	472.973	21.801	1.284	4.051	0.247	0.667
1300	0.457	1.000	0.956	100	884.459	471.622	135.000	0.676	1.000	1.000	1.000
1301	3.652	0.820	3.022	100	686.486	472.973	116.565	2.027	1.540	0.649	0.800
1302	1.370	0.967	2.137	100	870.270	472.973	161.565	0.676	3.000	0.333	1.000
1303	0.457	1.000	0.956	100	886.486	472.973	135.000	0.676	1.000	1.000	1.000
1304	4.109	0.498	4.533	100	1021.622	475.000	26.565	2.027	2.932	0.341	0.692
1305	0.457	1.000	0.956	100	874.324	473.649	135.000	0.676	1.000	1.000	1.000
1306	9.131	0.337	8.220	100	778.378	482.432	80.538	2.027	4.166	0.240	0.690
1307	12.327	0.582	7.054	96.296	883.784	475.676	163.301	3.378	2.413	0.414	0.761
1308	15.522	0.719	6.043	97.059	648.649	475.000	116.565	4.730	1.155	0.866	0.782
1309	9.131	0.228	10.576	100	995.270	475.000	153.435	2.436	6.180	0.162	0.465
1310	0.457	1.000	0.956	100	1033.784	475.000	135.000	0.676	1.000	1.000	1.000
1311	0.913	1.000	1.511	100	1008.108	475.676	153.435	0.676	2.000	0.500	1.000
1312	15.522	0.221	10.225	100	1044.595	481.081	7.595	5.405	1.859	0.538	0.447
1313	0.913	1.000	1.511	100	277.027	476.351	116.565	0.676	2.000	0.500	1.000
1314	1.826	0.857	2.436	100	687.838	477.027	123.690	1.351	2.031	0.492	0.800
1315	2.739	0.615	3.639	100	1010.135	478.378	21.801	1.351	3.550	0.282	0.750
1316	1.826	1.000	1.911	100	277.027	478.378	135.000	1.351	1.000	1.000	1.000
1317	0.457	1.000	0.956	100	1000.000	479.054	135.000	0.676	1.000	1.000	1.000
1318	154.766	0.540	20.270	99.115	877.703	495.946	53.130	14.333	1.690	0.592	0.772
1319	0.457	1.000	0.956	100	983.784	479.730	135.000	0.676	1.000	1.000	1.000
1320	15.979	0.182	15.599	100	312.162	480.405	162.350	2.039	11.512	0.087	0.588
1321	1.826	0.740	2.786	100	977.703	480.405	165.964	0.676	4.000	0.250	1.000
1322	0.457	1.000	0.956	100	1004.730	480.405	135.000	0.676	1.000	1.000	1.000
1323	1.370	0.967	2.137	100	1055.405	480.405	161.565	0.676	3.000	0.333	1.000
1324	2.283	1.000	2.436	100	650.676	481.081	146.310	1.351	1.553	0.644	0.909
1325	18.262	0.281	11.486	95	1033.784	486.486	28.072	4.385	2.804	0.357	0.513
1326	140.614	0.413	25.435	100	124.324	502.027	50.389	10.400	2.485	0.402	0.720
1327	1.826	1.000	1.911	100	689.865	482.432	135.000	1.351	1.000	1.000	1.000
1328	2.283	1.000	2.436	100	179.730	485.135	56.310	1.351	1.553	0.644	0.909
1329	2.283	1.000	2.436	100	689.189	484.459	146.310	1.351	1.553	0.644	0.909
1330	0.457	1.000	0.956	100	778.378	484.459	135.000	0.676	1.000	1.000	1.000
1331	0.457	1.000	0.956	100	908.108	485.135	135.000	0.676	1.000	1.000	1.000
1332	2.283	0.572	3.378	100	912.838	487.162	36.870	1.690	2.511	0.398	0.625
1333	0.913	1.000	1.511	100	180.405	485.811	153.435	0.676	2.000	0.500	1.000
1334	1.370	0.809	2.137	100	778.378	485.811	108.435	0.676	3.000	0.333	1.000
1335	0.457	1.000	0.956	100	183.784	486.486	135.000	0.676	1.000	1.000	1.000
1336	27.849	0.441	12.422	100	666.892	488.514	157.620	4.536	2.855	0.350	0.709
1337	0.457	1.000	0.956	100	691.216	486.486	135.000	0.676	1.000	1.000	1.000
1338	11.870	0.478	6.957	100	904.054	492.568	60.945	3.934	2.005	0.499	0.642
1339	0.913	1.000	1.511	100	729.730	487.162	116.565	0.676	2.000	0.500	1.000
1340	6.392	0.502	5.447	100	1032.432	491.892	60.255	2.703	2.513	0.398	0.636
1341	4.565	0.449	5.447	100	183.108	487.838	150.255	1.740	4.354	0.230	0.645
1342	0.913	1.000	1.511	100	1122.297	488.514	116.565	0.676	2.000	0.500	1.000
1343	34.240	0.176	18.846	100	779.054	489.865	104.534	4.175	6.334	0.158	0.551
1344	21.457	0.396	9.387	100	679.730	493.243	149.744	5.332	1.825	0.548	0.681
1345	7.305	0.772	5.277	100	926.351	495.946	50.194	2.389	2.677	0.374	0.780
1346	0.913	1.000	1.511	100	1005.405	491.892	153.435	0.676	2.000	0.500	1.000
1347	1.370	0.809	2.137	100	1097.297	491.892	108.435	0.676	3.000	0.333	1.000
1348	0.913	1.000	1.511	100	1007.432	492.568	153.435	0.676	2.000	0.500	1.000
1349	1.370	0.754	2.436	100	1052.703	493.919	33.690	1.209	2.702	0.370	0.667
1350	0.457	1.000	0.956	100	902.703	493.243	135.000	0.676	1.000	1.000	1.000
1351	1.826	0.740	2.786	100	1047.973	493.243	165.964	0.676	4.000	0.250	1.000
1352	0.457	1.000	0.956	100	470.270	494.595	135.000	0.676	1.000	1.000	1.000
1353	1.370	0.754	2.436	100	1047.297	494.595	146.310	1.209	2.702	0.370	0.667
1354	27.392	0.143	21.632	98.333	1050.676	494.595	165.530	3.001	10.283	0.097	0.519
1355	39.719	0.173	23.965	100	137.838	504.730	21.501	4.926	5.825	0.172	0.457
1356	4.109	0.638	3.639	100	695.946	495.946	111.801	2.254	1.939	0.516	0.643
1357	1.826	0.539	3.022	100	1080.405	499.324	63.435	1.284	3.093	0.323	0.667
1358	0.913	1.000	1.511	100	313.514	497.297	153.435	0.676	2.000	0.500	1.000
1359	0.913	1.000	1.511	100	743.919	497.297	153.435	0.676	2.000	0.500	1.000
1360	0.457	1.000	0.956	100	860.811	497.297	135.000	0.676	1.000	1.000	1.000
1361	0.913	1.000	1.511	100	1078.378	497.297	153.435	0.676	2.000	0.500	1.000
1362	0.913	1.000	1.511	100	745.946	497.973	116.565	0.676	2.000	0.500	1.000
1363	0.913	1.000	1.511	100	858.108	497.973	153.435	0.676	2.000	0.500	1.000
1364	1.370	1.000	1.911	100	862.838	498.649	135.000	1.351	1.464	0.683	0.857
1365	1.826	0.740	2.786	100	1072.297	498.649	165.964	0.676	4.000	0.250	1.000
1366	3.196	0.800	3.022	100	1123.649	498.649	116.565	2.027	1.527	0.655	0.737
1367	0.913	1.000	1.511	100	689.189	499.324	153.435	0.676	2.000	0.500	1.000
1368	0.457	1.000	0.956	100	847.973	500.676	135.000	0.676	1.000	1.000	1.000
1369	1559.076	0.247	83.053	96.925	35.811	516.216	140.612	61.333	1.136	0.880	0.555
1370	0.457	1.000	0.956	100	1100.676	502.027	135.000	0.676	1.000	1.000	1.000
1371	230.551	0.230	36.361	100	882.432	503.378	131.987	14.666	2.316	0.432	0.592
1372	5.935	0.510	5.773	100	825.676	504.054	159.444	1.925	3.815	0.262	0.765
1373	0.457	1.000	0.956	100	1000.000	504.730	135.000	0.676	1.000	1.000	1.000
1374	5.022	0.268	7.277	100	128.378	508.108	21.801	1.496	7.484	0.134	0.579
1375	271.183	0.386	39.311	100	395.946	505.405	114.362	13.098	3.812	0.262	0.761
1376	0.913	1.000	1.511	100	1102.027	506.081	116.565	0.676	2.000	0.500	1.000
1377	1.370	0.967	2.137	100	183.108	507.432	161.565	0.676	3.000	0.333	1.000
1378	0.457	1.000	0.956	100	837.838	507.432	135.000	0.676	1.000	1.000	1.000
1379	0.457	1.000	0.956	100	1102.703	508.108	135.000	0.676	1.000	1.000	1.000
1380	0.457	1.000	0.956	100	698.649	508.784	135.000	0.676	1.000	1.000	1.000
1381	5.935	0.697	4.326	100	781.081	509.459	141.340	2.706	1.618	0.618	0.743
1382	0.913	1.000	1.511	100	836.486	508.784	153.435	0.676	2.000	0.500	1.000
1383	0.457	1.000	0.956	100	126.351	509.459	135.000	0.676	1.000	1.000	1.000
1384	3.652	0.740	3.445	100	590.541	509.459	101.310	1.351	2.232	0.448	0.889
1385	0.457	1.000	0.956	100	124.324	510.811	135.000	0.676	1.000	1.000	1.000
1386	3.196	1.000	2.436	100	259.459	512.838	123.690	2.027	1.069	0.936	0.875
1387	29.218	0.704	9.190	100	610.135	512.838	107.103	4.730	2.021	0.495	0.859
1388	0.913	1.000	1.511	100	205.405	513.514	153.435	0.676	2.000	0.500	1.000
1389	0.457	1.000	0.956	100	1064.865	513.514	135.000	0.676	1.000	1.000	1.000
1390	9.587	0.581	6.410	100	782.432	514.865	108.435	2.622	3.214	0.311	0.764
1391	0.913	1.000	1.511	100	795.946	514.865	116.565	0.676	2.000	0.500	1.000
1392	0.457	1.000	0.956	100	32.432	516.216	135.000	0.676	1.000	1.000	1.000
1393	0.913	1.000	1.511	100	704.730	516.216	153.435	0.676	2.000	0.500	1.000
1394	5.935	0.454	5.733	100	706.081	518.243	135.000	2.573	2.894	0.346	0.619
1395	0.457	1.000	0.956	100	443.243	518.919	135.000	0.676	1.000	1.000	1.000
1396	7.761	0.405	6.757	100	603.378	524.324	53.130	2.565	3.166	0.316	0.586
1397	0.457	1.000	0.956	100	911.486	519.595	135.000	0.676	1.000	1.000	1.000
1398	0.457	1.000	0.956	100	983.784	520.270	135.000	0.676	1.000	1.000	1.000
1399	1.370	1.000	1.911	100	253.378	522.297	45.000	1.351	1.464	0.683	0.857
1400	5.935	0.697	4.273	100	794.595	520.946	108.435	2.027	2.181	0.459	0.812
1401	0.457	1.000	0.956	100	352.703	523.649	135.000	0.676	1.000	1.000	1.000
1402	0.457	1.000	0.956	100	356.081	523.649	135.000	0.676	1.000	1.000	1.000
1403	1.826	0.740	2.786	100	360.135	523.649	165.964	0.676	4.000	0.250	1.000
1404	0.457	1.000	0.956	100	592.568	523.649	135.000	0.676	1.000	1.000	1.000
1405	0.457	1.000	0.956	100	783.108	523.649	135.000	0.676	1.000	1.000	1.000
1406	0.457	1.000	0.956	100	791.216	523.649	135.000	0.676	1.000	1.000	1.000
1407	3.652	0.740	3.639	100	366.216	524.324	158.199	1.351	2.564	0.390	0.889
1408	1.370	1.000	1.911	100	375.676	524.324	135.000	1.351	1.464	0.683	0.857
1409	0.457	1.000	0.956	100	852.027	524.324	135.000	0.676	1.000	1.000	1.000
1410	2.283	1.000	2.436	100	871.622	524.324	123.690	1.351	1.553	0.644	0.909
1411	0.913	1.000	1.511	100	1064.865	524.324	153.435	0.676	2.000	0.500	1.000
1412	4.565	1.000	3.022	100	789.865	526.351	153.435	2.027	1.236	0.809	0.909
1413	0.457	1.000	0.956	100	906.081	525.676	135.000	0.676	1.000	1.000	1.000
1414	11.870	0.703	5.812	100	248.649	531.081	54.462	4.192	1.452	0.689	0.712
1415	6.392	1.000	3.940	100	277.027	528.378	30.964	2.027	1.662	0.602	0.966
1416	0.457	1.000	0.956	100	167.568	527.027	135.000	0.676	1.000	1.000	1.000
1417	0.457	1.000	0.956	100	908.108	527.027	135.000	0.676	1.000	1.000	1.000
1418	3.196	1.000	3.022	100	911.486	527.027	153.435	1.351	1.936	0.517	0.933
1419	0.913	1.000	1.511	100	6.081	528.378	153.435	0.676	2.000	0.500	1.000
1420	0.913	1.000	1.511	100	276.351	529.054	153.435	0.676	2.000	0.500	1.000
1421	0.913	1.000	1.511	100	308.108	529.054	153.435	0.676	2.000	0.500	1.000
1422	7.305	0.276	8.164	100	716.216	529.054	114.444	1.819	6.216	0.161	0.561
1423	0.913	1.000	1.511	100	914.865	529.054	153.435	0.676	2.000	0.500	1.000
1424	0.457	1.000	0.956	100	5.405	529.730	135.000	0.676	1.000	1.000	1.000
1425	0.913	1.000	1.511	100	224.324	529.730	116.565	0.676	2.000	0.500	1.000
1426	3.196	0.800	3.022	100	912.838	529.730	116.565	1.925	1.730	0.578	0.737
1427	1.370	0.809	2.137	100	850.000	530.405	108.435	0.676	3.000	0.333	1.000
1428	0.457	1.000	0.956	100	608.108	531.757	135.000	0.676	1.000	1.000	1.000
1429	9.131	0.288	6.891	100	967.568	534.459	11.310	2.703	2.509	0.399	0.625
1430	3.196	0.898	2.786	100	322.973	533.108	165.964	2.027	1.387	0.721	0.737
1431	0.913	1.000	1.511	100	378.378	532.432	116.565	0.676	2.000	0.500	1.000
1432	8.218	0.706	5.146	100	29.730	535.811	23.199	2.703	1.822	0.549	0.837
1433	0.457	1.000	0.956	100	137.162	533.108	135.000	0.676	1.000	1.000	1.000
1434	11.870	0.441	6.043	100	910.811	533.108	116.565	4.054	1.375	0.727	0.667
1435	146.549	0.331	22.973	94.704	275.676	533.784	118.072	11.929	2.292	0.436	0.730
1436	26.936	0.337	10.554	100	601.351	540.541	39.806	6.761	1.989	0.503	0.615
1437	0.457	1.000	0.956	100	794.595	533.784	135.000	0.676	1.000	1.000	1.000
1438	0.457	1.000	0.956	100	683.784	534.459	135.000	0.676	1.000	1.000	1.000
1439	0.457	1.000	0.956	100	1083.784	534.459	135.000	0.676	1.000	1.000	1.000
1440	0.457	1.000	0.956	100	972.973	535.135	135.000	0.676	1.000	1.000	1.000
1441	1.826	1.000	1.911	100	228.378	536.486	135.000	1.351	1.000	1.000	1.000
1442	3.196	0.647	3.639	100	719.595	537.162	111.801	1.351	2.731	0.366	0.824
1443	32.871	0.472	12.459	98.611	235.135	539.865	167.471	4.513	3.028	0.330	0.778
1444	0.457	1.000	0.956	100	422.297	537.838	135.000	0.676	1.000	1.000	1.000
1445	0.457	1.000	0.956	100	167.568	538.514	135.000	0.676	1.000	1.000	1.000
1446	0.457	1.000	0.956	100	421.622	539.189	135.000	0.676	1.000	1.000	1.000
1447	2.283	0.536	3.445	100	783.784	539.189	101.310	0.676	5.000	0.200	1.000
1448	8.218	0.622	5.773	100	800.000	539.189	110.556	2.027	2.710	0.369	0.900
1449	0.913	1.000	1.511	100	423.649	539.865	116.565	0.676	2.000	0.500	1.000
1450	0.457	1.000	0.956	100	167.568	540.541	135.000	0.676	1.000	1.000	1.000
1451	0.457	1.000	0.956	100	608.784	540.541	135.000	0.676	1.000	1.000	1.000
1452	0.913	0.785	1.911	100	797.973	540.541	135.000	0.956	2.646	0.378	0.667
1453	0.457	1.000	0.956	100	967.568	540.541	135.000	0.676	1.000	1.000	1.000
1454	4.109	0.698	3.940	100	424.324	541.892	149.036	2.116	2.063	0.485	0.667
1455	10.500	0.756	5.277	100	916.216	541.892	140.194	3.822	1.324	0.755	0.807
1456	0.457	1.000	0.956	100	1054.054	541.216	135.000	0.676	1.000	1.000	1.000
1457	0.913	1.000	1.511	100	1064.865	541.216	116.565	0.676	2.000	0.500	1.000
1458	7.305	0.857	4.872	100	232.432	541.892	146.310	2.703	1.808	0.553	0.821
1459	15.979	0.428	8.248	100	604.730	548.649	55.008	3.934	2.248	0.445	0.693
1460	20.544	0.732	7.704	100	251.351	550.676	74.745	4.054	1.807	0.553	0.833
1461	0.457	1.000	0.956	100	934.459	543.243	135.000	0.676	1.000	1.000	1.000
1462	0.457	1.000	0.956	100	994.595	543.243	135.000	0.676	1.000	1.000	1.000
1463	0.457	1.000	0.956	100	1064.865	543.919	135.000	0.676	1.000	1.000	1.000
1464	6.392	0.838	4.326	100	720.270	547.973	51.340	2.353	1.966	0.509	0.824
1465	0.913	1.000	1.511	100	994.595	544.595	153.435	0.676	2.000	0.500	1.000
1466	0.913	1.000	1.511	100	997.297	544.595	153.435	0.676	2.000	0.500	1.000
1467	0.457	1.000	0.956	100	200.000	545.270	135.000	0.676	1.000	1.000	1.000
1468	0.457	1.000	0.956	100	661.486	545.270	135.000	0.676	1.000	1.000	1.000
1469	2.283	0.572	3.378	100	1137.838	545.270	126.870	1.690	2.511	0.398	0.625
1470	27.392	0.209	15.832	100	236.486	545.946	129.806	3.767	5.673	0.176	0.588
1471	157.505	0.535	18.193	100	258.108	562.838	68.199	14.683	1.402	0.713	0.786
1472	0.913	1.000	1.511	100	994.595	545.946	116.565	0.676	2.000	0.500	1.000
1473	1.370	0.809	2.137	100	1091.892	545.946	108.435	0.676	3.000	0.333	1.000
1474	0.457	1.000	0.956	100	1129.730	545.946	135.000	0.676	1.000	1.000	1.000
1475	0.457	1.000	0.956	100	724.324	546.622	135.000	0.676	1.000	1.000	1.000
1476	0.457	1.000	0.956	100	938.514	546.622	135.000	0.676	1.000	1.000	1.000
1477	3.652	0.520	3.940	100	35.135	549.324	30.964	2.027	2.618	0.382	0.615
1478	0.457	1.000	0.956	100	1059.459	547.297	135.000	0.676	1.000	1.000	1.000
1479	0.457	1.000	0.956	100	286.486	547.973	135.000	0.676	1.000	1.000	1.000
1480	4.565	0.579	3.639	100	286.486	550.676	21.801	2.703	1.429	0.700	0.645
1481	0.913	1.000	1.511	100	1139.189	549.324	153.435	0.676	2.000	0.500	1.000
1482	0.913	1.000	1.511	100	243.919	550.676	153.435	0.676	2.000	0.500	1.000
1483	40.175	0.323	16.244	100	291.216	550.676	163.072	5.169	4.437	0.225	0.629
1484	1.826	0.611	3.022	100	627.027	552.027	26.565	1.209	3.493	0.286	0.667
1485	0.457	1.000	0.956	100	1059.459	550.676	135.000	0.676	1.000	1.000	1.000
1486	0.457	1.000	0.956	100	1081.081	550.676	135.000	0.676	1.000	1.000	1.000
1487	0.457	1.000	0.956	100	625.676	551.351	135.000	0.676	1.000	1.000	1.000
1488	0.457	1.000	0.956	100	994.595	551.351	135.000	0.676	1.000	1.000	1.000
1489	0.457	1.000	0.956	100	1043.243	551.351	135.000	0.676	1.000	1.000	1.000
1490	1.370	1.000	1.911	100	716.216	553.378	45.000	1.351	1.464	0.683	0.857
1491	0.457	1.000	0.956	100	433.784	552.703	135.000	0.676	1.000	1.000	1.000
1492	27.849	0.149	20.683	100	731.757	552.703	141.633	5.084	5.238	0.191	0.380
1493	0.457	1.000	0.956	100	215.541	553.378	135.000	0.676	1.000	1.000	1.000
1494	0.913	1.000	1.511	100	714.189	553.378	153.435	0.676	2.000	0.500	1.000
1495	0.913	1.000	1.511	100	1138.514	553.378	153.435	0.676	2.000	0.500	1.000
1496	0.913	1.000	1.511	100	716.216	554.054	153.435	0.676	2.000	0.500	1.000
1497	1.826	1.000	1.911	100	713.514	554.730	135.000	1.351	1.000	1.000	1.000
1498	0.913	1.000	1.511	100	1097.297	554.730	153.435	0.676	2.000	0.500	1.000
1499	0.913	1.000	1.511	100	27.027	555.405	153.435	0.676	2.000	0.500	1.000
1500	98.612	0.080	52.811	98.611	369.595	555.405	163.652	6.449	14.114	0.071	0.380
1501	3.196	0.621	3.378	100	606.081	555.405	126.870	1.925	2.069	0.483	0.700
1502	0.457	1.000	0.956	100	107.432	556.081	135.000	0.676	1.000	1.000	1.000
1503	0.913	1.000	1.511	100	220.946	556.081	153.435	0.676	2.000	0.500	1.000
1504	1.370	0.967	2.137	100	927.703	556.081	161.565	0.676	3.000	0.333	1.000
1505	0.913	1.000	1.511	100	106.081	556.757	116.565	0.676	2.000	0.500	1.000
1506	0.457	1.000	0.956	100	166.892	556.757	135.000	0.676	1.000	1.000	1.000
1507	9.587	0.466	7.644	100	710.135	562.162	45.000	2.440	4.225	0.237	0.636
1508	1.826	1.000	2.436	100	303.378	558.108	146.310	1.351	2.031	0.492	0.800
1509	18.718	0.529	9.411	100	431.081	558.784	158.962	3.606	2.929	0.341	0.759
1510	0.457	1.000	0.956	100	24.324	559.459	135.000	0.676	1.000	1.000	1.000
1511	0.913	1.000	1.511	100	43.243	559.459	153.435	0.676	2.000	0.500	1.000
1512	1.826	0.857	2.436	100	806.757	560.811	33.690	1.351	2.000	0.500	0.800
1513	0.457	1.000	0.956	100	1023.649	559.459	135.000	0.676	1.000	1.000	1.000
1514	0.913	1.000	1.511	100	943.243	560.135	153.435	0.676	2.000	0.500	1.000
1515	0.913	1.000	1.511	100	708.108	560.811	116.565	0.676	2.000	0.500	1.000
1516	1.370	0.809	2.137	100	605.405	561.486	108.435	0.676	3.000	0.333	1.000
1517	2.739	0.615	3.639	100	741.892	561.486	158.199	1.351	3.306	0.302	0.750
1518	0.457	1.000	0.956	100	947.297	561.486	135.000	0.676	1.000	1.000	1.000
1519	1.370	1.000	1.911	100	1024.324	561.486	135.000	1.351	1.464	0.683	0.857
1520	0.457	1.000	0.956	100	28.378	562.162	135.000	0.676	1.000	1.000	1.000
1521	14.609	0.278	8.547	100	708.784	570.946	71.565	3.849	2.876	0.348	0.566
1522	1.826	1.000	1.911	100	222.973	563.514	135.000	1.351	1.000	1.000	1.000
1523	0.913	0.785	1.911	100	441.892	563.514	135.000	0.956	2.646	0.378	0.667
1524	0.457	1.000	0.956	100	935.135	563.514	135.000	0.676	1.000	1.000	1.000
1525	14.153	0.526	6.229	100	268.919	564.865	130.601	4.917	1.473	0.679	0.653
1526	3.196	0.621	3.940	100	962.162	565.541	149.036	1.814	2.842	0.352	0.667
1527	24.196	0.575	7.880	100	1023.649	572.973	59.036	5.345	1.551	0.645	0.785
1528	2.283	1.000	2.436	100	304.054	566.216	146.310	1.351	1.553	0.644	0.909
1529	1.370	1.000	1.911	100	445.946	566.216	135.000	1.351	1.464	0.683	0.857
1530	0.457	1.000	0.956	100	752.703	567.568	135.000	0.676	1.000	1.000	1.000
1531	0.457	1.000	0.956	100	945.946	568.919	135.000	0.676	1.000	1.000	1.000
1532	354.730	0.144	34.783	96.139	578.378	591.216	29.055	22.794	1.277	0.783	0.597
1533	0.457	1.000	0.956	100	421.622	571.622	135.000	0.676	1.000	1.000	1.000
1534	1.826	1.000	1.911	100	604.054	571.622	135.000	1.351	1.000	1.000	1.000
1535	352.447	0.396	42.185	99.093	761.486	571.622	148.092	15.052	2.941	0.340	0.752
1536	0.457	1.000	0.956	100	974.324	572.297	135.000	0.676	1.000	1.000	1.000
1537	155.679	0.623	21.758	100	1028.378	572.297	115.769	11.381	2.118	0.472	0.861
1538	3.196	1.000	3.022	100	422.297	573.649	153.435	1.351	1.936	0.517	0.933
1539	0.913	1.000	1.511	100	708.108	573.649	116.565	0.676	2.000	0.500	1.000
1540	0.913	0.785	1.911	100	1091.216	577.703	135.000	0.956	2.646	0.378	0.667
1541	11.413	0.443	8.600	100	939.865	584.459	45.000	2.772	4.505	0.222	0.633
1542	13.696	0.250	10.511	100	415.541	586.486	45.000	3.822	3.226	0.310	0.500
1543	0.457	1.000	0.956	100	951.351	579.054	135.000	0.676	1.000	1.000	1.000
1544	1.370	0.967	2.137	100	1085.135	579.054	161.565	0.676	3.000	0.333	1.000
1545	3.652	0.645	3.639	100	425.000	580.405	111.801	1.713	2.617	0.382	0.696
1546	3.196	0.718	3.445	100	816.216	581.081	168.690	1.351	2.423	0.413	0.824
1547	371.165	0.269	37.236	99.877	293.919	581.081	101.514	17.361	2.430	0.412	0.701
1548	0.457	1.000	0.956	100	445.946	581.081	135.000	0.676	1.000	1.000	1.000
1549	0.457	1.000	0.956	100	1000.000	581.081	135.000	0.676	1.000	1.000	1.000
1550	1.370	0.967	2.137	100	806.757	581.757	161.565	0.676	3.000	0.333	1.000
1551	1.826	1.000	2.436	100	810.811	583.108	33.690	1.351	2.000	0.500	0.800
1552	0.457	1.000	0.956	100	577.703	582.432	135.000	0.676	1.000	1.000	1.000
1553	0.457	1.000	0.956	100	821.622	582.432	135.000	0.676	1.000	1.000	1.000
1554	2.283	0.873	2.867	100	410.135	585.135	45.000	1.433	2.308	0.433	0.769
1555	0.457	1.000	0.956	100	422.297	583.108	135.000	0.676	1.000	1.000	1.000
1556	0.457	1.000	0.956	100	575.000	583.108	135.000	0.676	1.000	1.000	1.000
1557	0.457	1.000	0.956	100	175.676	583.784	135.000	0.676	1.000	1.000	1.000
1558	0.457	1.000	0.956	100	593.919	583.784	135.000	0.676	1.000	1.000	1.000
1559	0.457	1.000	0.956	100	821.622	583.784	135.000	0.676	1.000	1.000	1.000
1560	0.457	1.000	0.956	100	443.243	584.459	135.000	0.676	1.000	1.000	1.000
1561	21.914	0.376	10.895	100	820.270	585.811	150.255	5.141	2.419	0.413	0.686
1562	2.283	0.599	3.445	100	980.405	585.135	168.690	0.676	5.000	0.200	1.000
1563	68.481	0.380	16.688	98	393.243	595.270	31.759	10.278	1.773	0.564	0.620
1564	3.196	0.434	4.778	100	1010.811	585.811	171.870	0.676	7.000	0.143	1.000
1565	0.457	1.000	0.956	100	1017.568	585.811	135.000	0.676	1.000	1.000	1.000
1566	0.457	1.000	0.956	100	443.243	586.486	135.000	0.676	1.000	1.000	1.000
1567	5.022	0.448	4.326	100	982.432	586.486	141.340	2.703	1.488	0.672	0.647
1568	61.176	0.236	21.590	100	1045.946	586.486	159.864	5.856	4.458	0.224	0.655
1569	0.913	1.000	1.511	100	427.027	587.162	153.435	0.676	2.000	0.500	1.000
1570	29.218	0.385	10.336	98.438	638.514	589.189	168.690	5.253	1.898	0.527	0.727
1571	16.435	0.575	7.644	100	1137.162	592.568	45.000	4.300	1.696	0.590	0.720
1572	0.913	1.000	1.511	100	405.405	587.838	153.435	0.676	2.000	0.500	1.000
1573	0.457	1.000	0.956	100	563.514	587.838	135.000	0.676	1.000	1.000	1.000
1574	0.913	1.000	1.511	100	841.216	587.838	153.435	0.676	2.000	0.500	1.000
1575	0.457	1.000	0.956	100	875.676	587.838	135.000	0.676	1.000	1.000	1.000
1576	453.342	0.311	49.329	99.698	916.216	602.703	13.465	14.955	3.955	0.253	0.766
1577	7.761	0.470	6.229	100	562.162	588.514	102.529	2.676	2.374	0.421	0.642
1578	1.370	0.643	2.436	100	410.135	591.216	56.310	1.209	2.702	0.370	0.667
1579	3.652	0.785	3.822	100	572.973	591.892	45.000	1.876	2.677	0.374	0.727
1580	0.913	1.000	1.511	100	841.892	589.189	153.435	0.676	2.000	0.500	1.000
1581	0.457	1.000	0.956	100	429.054	589.865	135.000	0.676	1.000	1.000	1.000
1582	8.674	0.640	5.447	100	313.514	590.541	97.125	2.703	2.007	0.498	0.776
1583	3.652	0.287	5.146	100	683.108	590.541	156.801	2.027	3.392	0.295	0.533
1584	0.913	1.000	1.511	100	431.081	591.216	153.435	0.676	2.000	0.500	1.000
1585	0.913	1.000	1.511	100	680.405	591.216	116.565	0.676	2.000	0.500	1.000
1586	1.826	0.740	2.786	100	689.189	591.216	165.964	0.676	4.000	0.250	1.000
1587	11.870	0.549	7.644	100	701.351	591.216	135.000	2.793	3.293	0.304	0.743
1588	3.196	0.647	3.445	100	556.757	591.892	101.310	1.351	2.423	0.413	0.824
1589	0.457	1.000	0.956	100	694.595	591.892	135.000	0.676	1.000	1.000	1.000
1590	3.196	0.943	3.022	100	1067.568	593.243	26.565	1.351	1.936	0.517	0.933
1591	24.653	0.484	8.466	100	548.649	596.622	28.610	5.970	1.754	0.570	0.692
1592	0.913	1.000	1.511	100	683.108	592.568	153.435	0.676	2.000	0.500	1.000
1593	1.826	0.740	2.786	100	688.514	592.568	165.964	0.676	4.000	0.250	1.000
1594	0.913	1.000	1.511	100	691.892	592.568	153.435	0.676	2.000	0.500	1.000
1595	0.913	1.000	1.511	100	696.622	592.568	153.435	0.676	2.000	0.500	1.000
1596	0.913	1.000	1.511	100	1071.622	592.568	153.435	0.676	2.000	0.500	1.000
1597	5.935	0.360	5.773	100	693.919	593.243	159.444	2.703	2.014	0.496	0.553
1598	4.109	0.638	3.822	100	1078.378	593.243	135.000	2.389	1.936	0.517	0.667
1599	0.913	1.000	1.511	100	1135.135	593.243	116.565	0.676	2.000	0.500	1.000
1600	4.109	0.799	3.940	100	237.838	595.946	30.964	1.911	2.326	0.430	0.818
1601	2.283	1.000	2.436	100	408.784	593.919	146.310	1.351	1.553	0.644	0.909
1602	1.826	0.740	2.786	100	411.486	593.919	165.964	0.676	4.000	0.250	1.000
1603	0.913	1.000	1.511	100	691.892	593.919	153.435	0.676	2.000	0.500	1.000
1604	2.283	0.764	3.022	100	414.865	595.946	26.565	1.351	2.610	0.383	0.769
1605	0.457	1.000	0.956	100	427.027	594.595	135.000	0.676	1.000	1.000	1.000
1606	44.741	0.378	14.554	100	442.568	596.622	158.199	5.806	2.694	0.371	0.715
1607	10.044	0.343	7.554	100	572.297	595.270	169.695	2.703	3.614	0.277	0.647
1608	4.109	0.404	5.447	100	660.811	594.595	150.255	1.814	4.200	0.238	0.581
1609	3.652	0.520	4.110	100	904.730	594.595	170.538	1.351	2.797	0.357	0.762
1610	0.913	1.000	1.511	100	1128.378	594.595	153.435	0.676	2.000	0.500	1.000
1611	0.457	1.000	0.956	100	594.595	595.270	135.000	0.676	1.000	1.000	1.000
1612	3.652	0.645	3.639	100	902.027	595.270	158.199	1.967	1.878	0.533	0.696
1613	22.827	0.736	6.957	100	313.514	597.297	150.945	6.021	1.238	0.808	0.794
1614	7.305	0.294	8.164	100	650.676	599.324	24.444	2.142	5.703	0.175	0.533
1615	7.305	0.526	5.277	100	433.108	600.000	39.806	3.344	1.797	0.557	0.653
1616	0.913	1.000	1.511	100	437.838	596.622	153.435	0.676	2.000	0.500	1.000
1617	2.739	0.555	3.639	100	667.568	596.622	158.199	1.351	3.550	0.282	0.750
1618	1.370	0.967	2.137	100	697.297	596.622	161.565	0.676	3.000	0.333	1.000
1619	4.109	0.447	5.146	100	979.730	596.622	156.801	1.886	3.677	0.272	0.643
1620	1.370	0.967	2.137	100	1122.297	596.622	161.565	0.676	3.000	0.333	1.000
1621	0.457	1.000	0.956	100	137.162	597.297	135.000	0.676	1.000	1.000	1.000
1622	2.739	0.916	3.022	100	412.838	597.297	153.435	1.351	2.082	0.480	0.857
1623	0.913	1.000	1.511	100	1074.324	597.297	153.435	0.676	2.000	0.500	1.000
1624	1.826	0.513	2.786	100	1116.892	597.973	165.964	1.351	2.293	0.436	0.615
1625	1.826	0.740	2.786	100	425.000	597.973	165.964	0.676	4.000	0.250	1.000
1626	1.826	0.740	2.786	100	656.081	597.973	165.964	0.676	4.000	0.250	1.000
1627	0.457	1.000	0.956	100	668.243	597.973	135.000	0.676	1.000	1.000	1.000
1628	1.826	0.857	2.436	100	421.622	600.676	56.310	1.351	2.000	0.500	0.800
1629	2.739	0.484	2.867	100	437.838	600.676	45.000	2.027	1.251	0.799	0.706
1630	0.457	1.000	0.956	100	671.622	598.649	135.000	0.676	1.000	1.000	1.000
1631	0.457	1.000	0.956	100	989.189	598.649	135.000	0.676	1.000	1.000	1.000
1632	0.913	1.000	1.511	100	428.378	599.324	153.435	0.676	2.000	0.500	1.000
1633	0.457	1.000	0.956	100	442.568	599.324	135.000	0.676	1.000	1.000	1.000
1634	0.457	1.000	0.956	100	127.703	600.000	135.000	0.676	1.000	1.000	1.000
1635	0.457	1.000	0.956	100	420.270	600.000	135.000	0.676	1.000	1.000	1.000
1636	3.196	1.000	2.436	100	645.270	600.000	123.690	2.027	1.069	0.936	0.875
1637	0.913	1.000	1.511	100	864.865	600.000	116.565	0.676	2.000	0.500	1.000
1638	1.370	0.967	2.137	100	544.595	600.676	161.565	0.676	3.000	0.333	1.000
1639	0.913	1.000	1.511	100	243.919	601.351	153.435	0.676	2.000	0.500	1.000
1640	1.370	1.000	1.911	100	532.432	603.378	45.000	1.351	1.464	0.683	0.857
1641	0.913	1.000	1.511	100	537.838	602.027	153.435	0.676	2.000	0.500	1.000
1642	7.761	0.497	6.410	100	1118.919	604.730	18.435	2.132	4.055	0.247	0.694
1643	0.913	1.000	1.511	100	441.216	602.703	153.435	0.676	2.000	0.500	1.000
1644	0.913	1.000	1.511	100	1105.405	602.703	153.435	0.676	2.000	0.500	1.000
1645	8.674	0.796	4.872	100	1107.432	607.432	56.310	2.703	1.655	0.604	0.844
1646	0.457	1.000	0.956	100	102.703	604.054	135.000	0.676	1.000	1.000	1.000
1647	0.457	1.000	0.956	100	134.459	604.054	135.000	0.676	1.000	1.000	1.000
1648	0.457	1.000	0.956	100	459.459	604.054	135.000	0.676	1.000	1.000	1.000
1649	0.913	1.000	1.511	100	455.405	604.730	153.435	0.676	2.000	0.500	1.000
1650	0.913	1.000	1.511	100	1017.568	604.730	153.435	0.676	2.000	0.500	1.000
1651	1.826	0.857	2.436	100	631.081	605.405	146.310	1.351	2.000	0.500	0.800
1652	0.913	1.000	1.511	100	935.135	605.405	116.565	0.676	2.000	0.500	1.000
1653	345.599	0.267	30.217	100	464.865	635.811	79.695	25.036	1.121	0.892	0.653
1654	35.610	0.431	11.819	100	809.459	606.757	149.036	5.845	2.493	0.401	0.670
1655	2.283	0.572	3.378	100	1027.027	606.757	143.130	1.496	2.980	0.336	0.625
1656	76.242	0.613	14.834	100	1089.865	618.243	30.069	10.627	1.305	0.766	0.817
1657	4.109	1.000	3.378	100	1016.216	611.486	53.130	2.027	1.542	0.648	0.857
1658	2.739	1.000	2.867	100	325.000	609.459	135.000	1.814	1.809	0.553	0.800
1659	1.370	0.967	2.137	100	1031.757	609.459	161.565	0.676	3.000	0.333	1.000
1660	2.283	0.513	3.639	100	316.216	610.135	158.199	1.284	4.051	0.247	0.667
1661	786.614	0.324	53.383	100	491.216	624.324	179.275	34.043	1.714	0.583	0.641
1662	1.370	1.000	1.911	100	445.270	610.811	135.000	1.351	1.464	0.683	0.857
1663	1.370	0.967	2.137	100	1037.838	610.811	161.565	0.676	3.000	0.333	1.000
1664	6.392	0.379	6.655	100	1052.703	612.162	156.038	2.119	4.293	0.233	0.596
1665	15.522	0.301	7.880	100	113.514	612.162	120.964	4.643	1.872	0.534	0.591
1666	0.457	1.000	0.956	100	293.919	612.162	135.000	0.676	1.000	1.000	1.000
1667	0.457	1.000	0.956	100	524.324	612.162	135.000	0.676	1.000	1.000	1.000
1668	0.457	1.000	0.956	100	1014.189	612.162	135.000	0.676	1.000	1.000	1.000
1669	0.457	1.000	0.956	100	118.243	613.514	135.000	0.676	1.000	1.000	1.000
1670	0.913	0.785	1.911	100	920.270	614.865	45.000	0.956	2.646	0.378	0.667
1671	0.913	1.000	1.511	100	1059.459	614.189	153.435	0.676	2.000	0.500	1.000
1672	0.457	1.000	0.956	100	113.514	614.865	135.000	0.676	1.000	1.000	1.000
1673	4.109	0.799	3.378	100	118.919	614.865	126.870	2.027	1.552	0.645	0.783
1674	0.913	0.785	1.911	100	891.892	614.865	135.000	0.956	2.646	0.378	0.667
1675	0.457	1.000	0.956	100	902.027	614.865	135.000	0.676	1.000	1.000	1.000
1676	0.457	1.000	0.956	100	45.270	616.216	135.000	0.676	1.000	1.000	1.000
1677	0.457	1.000	0.956	100	891.216	616.216	135.000	0.676	1.000	1.000	1.000
1678	1.370	0.524	2.867	100	917.568	616.216	135.000	0.956	4.123	0.243	0.600
1679	110.026	0.410	21.558	99.585	316.216	617.568	122.196	10.040	2.376	0.421	0.782
1680	3.196	0.898	3.378	100	897.297	618.919	36.870	1.814	2.339	0.427	0.778
1681	11.413	0.266	6.957	100	122.297	617.568	150.945	3.902	1.791	0.558	0.610
1682	2.283	0.873	2.436	100	302.703	617.568	123.690	1.814	1.496	0.668	0.714
1683	0.913	1.000	1.511	100	920.270	618.243	116.565	0.676	2.000	0.500	1.000
1684	4.565	1.000	3.378	100	475.676	621.622	53.130	2.027	1.559	0.641	0.909
1685	0.457	1.000	0.956	100	859.459	618.919	135.000	0.676	1.000	1.000	1.000
1686	4.109	1.000	3.022	100	113.514	622.973	63.435	2.027	1.340	0.746	0.857
1687	57.067	0.596	13.681	99.200	812.838	620.946	110.225	7.711	1.956	0.511	0.755
1688	0.457	1.000	0.956	100	127.027	621.622	135.000	0.676	1.000	1.000	1.000
1689	0.457	1.000	0.956	100	827.027	622.297	135.000	0.676	1.000	1.000	1.000
1690	1.370	1.000	1.911	100	741.216	623.649	135.000	1.351	1.464	0.683	0.857
1691	5.935	0.753	3.822	100	1016.216	624.324	135.000	2.703	1.360	0.735	0.765
1692	13.696	0.752	6.655	100	545.946	625.000	156.038	3.378	1.838	0.544	0.822
1693	0.457	1.000	0.956	100	333.108	626.351	135.000	0.676	1.000	1.000	1.000
1694	0.457	1.000	0.956	100	845.946	626.351	135.000	0.676	1.000	1.000	1.000
1695	0.913	1.000	1.511	100	110.811	627.027	116.565	0.676	2.000	0.500	1.000
1696	5.478	0.967	3.639	100	1016.892	628.378	111.801	2.027	1.579	0.633	0.889
1697	0.457	1.000	0.956	100	550.676	629.730	135.000	0.676	1.000	1.000	1.000
1698	0.457	1.000	0.956	100	654.054	630.405	135.000	0.676	1.000	1.000	1.000
1699	1.370	1.000	1.911	100	146.622	631.081	135.000	1.351	1.464	0.683	0.857
1700	0.457	1.000	0.956	100	470.270	631.081	135.000	0.676	1.000	1.000	1.000
1701	5.478	0.781	4.273	100	791.216	632.432	18.435	2.027	2.122	0.471	0.828
1702	0.457	1.000	0.956	100	110.811	631.757	135.000	0.676	1.000	1.000	1.000
1703	1.826	1.000	1.911	100	854.054	631.757	135.000	1.351	1.000	1.000	1.000
1704	2.739	0.686	3.378	100	1017.568	632.432	126.870	1.690	2.519	0.397	0.706
1705	14.153	0.432	9.190	100	1052.703	633.108	143.973	3.344	3.598	0.278	0.633
1706	6.392	0.535	4.778	92.857	472.973	634.459	171.870	2.703	1.939	0.516	0.636
1707	1.370	0.754	2.436	100	1068.919	634.459	33.690	1.209	2.702	0.370	0.667
1708	0.457	1.000	0.956	100	1066.892	634.459	135.000	0.676	1.000	1.000	1.000
1709	0.457	1.000	0.956	100	740.541	635.135	135.000	0.676	1.000	1.000	1.000
1710	0.913	1.000	1.511	100	331.081	636.486	116.565	0.676	2.000	0.500	1.000
1711	0.457	1.000	0.956	100	741.216	637.162	135.000	0.676	1.000	1.000	1.000
1712	0.913	1.000	1.511	100	1123.649	637.162	153.435	0.676	2.000	0.500	1.000
1713	0.913	1.000	1.511	100	150.676	637.838	116.565	0.676	2.000	0.500	1.000
1714	30.588	0.341	12.422	97.015	1094.595	644.595	22.380	5.989	1.815	0.551	0.596
1715	0.457	1.000	0.956	100	880.405	639.865	135.000	0.676	1.000	1.000	1.000
1716	3.196	1.000	3.022	100	1102.703	642.568	26.565	1.351	1.936	0.517	0.933
1717	0.457	1.000	0.956	100	740.541	643.919	135.000	0.676	1.000	1.000	1.000
1718	2.283	0.764	3.022	100	912.162	647.297	26.565	1.351	2.610	0.383	0.769
1719	20.544	0.812	7.554	97.778	1084.459	652.703	63.435	4.233	1.838	0.544	0.857
1720	3.652	0.710	3.940	100	1093.919	647.973	30.964	1.814	2.750	0.364	0.762
1721	0.913	1.000	1.511	100	147.973	647.973	116.565	0.676	2.000	0.500	1.000
1722	0.913	1.000	1.511	100	463.514	647.973	153.435	0.676	2.000	0.500	1.000
1723	7.305	0.559	4.919	100	902.027	654.054	74.055	2.703	1.942	0.515	0.711
1724	0.457	1.000	0.956	100	148.649	650.000	135.000	0.676	1.000	1.000	1.000
1725	0.913	1.000	1.511	100	1035.135	650.000	153.435	0.676	2.000	0.500	1.000
1726	0.457	1.000	0.956	100	434.459	650.676	135.000	0.676	1.000	1.000	1.000
1727	0.457	1.000	0.956	100	886.486	650.676	135.000	0.676	1.000	1.000	1.000
1728	0.457	1.000	0.956	100	1139.865	651.351	135.000	0.676	1.000	1.000	1.000
1729	60.263	0.570	12.181	100	424.324	654.054	160.560	8.549	1.511	0.662	0.779
1730	1.370	1.000	1.911	100	1135.135	652.027	135.000	1.351	1.464	0.683	0.857
1731	1.826	1.000	2.436	100	906.757	652.703	146.310	1.351	2.031	0.492	0.800
1732	0.913	1.000	1.511	100	1139.189	652.703	153.435	0.676	2.000	0.500	1.000
1733	0.457	1.000	0.956	100	457.432	653.378	135.000	0.676	1.000	1.000	1.000
1734	0.457	1.000	0.956	100	1135.135	654.054	135.000	0.676	1.000	1.000	1.000
1735	1.370	1.000	1.911	100	1140.541	655.405	45.000	1.351	1.464	0.683	0.857
1736	5.478	0.458	5.277	100	527.027	658.784	39.806	2.389	3.246	0.308	0.558
1737	0.457	1.000	0.956	100	909.459	654.730	135.000	0.676	1.000	1.000	1.000
1738	40.632	0.530	12.404	100	165.541	655.405	119.358	5.794	2.643	0.378	0.748
1739	0.457	1.000	0.956	100	454.054	655.405	135.000	0.676	1.000	1.000	1.000
1740	3.652	0.621	3.822	100	733.784	655.405	135.000	2.351	2.094	0.478	0.640
1741	1.370	0.967	2.137	100	1136.486	655.405	161.565	0.676	3.000	0.333	1.000
1742	0.913	1.000	1.511	100	333.784	656.081	153.435	0.676	2.000	0.500	1.000
1743	0.913	1.000	1.511	100	335.811	656.081	153.435	0.676	2.000	0.500	1.000
1744	13.696	0.442	8.810	100	1021.622	663.514	57.529	3.066	3.538	0.283	0.682
1745	0.457	1.000	0.956	100	1135.135	656.081	135.000	0.676	1.000	1.000	1.000
1746	0.457	1.000	0.956	100	1139.865	656.081	135.000	0.676	1.000	1.000	1.000
1747	3.196	0.496	3.940	100	450.676	660.135	59.036	1.816	2.563	0.390	0.560
1748	5.022	0.394	5.812	100	906.757	662.162	54.462	1.854	4.264	0.235	0.595
1749	5.022	0.659	4.533	100	1067.568	659.459	26.565	2.027	2.639	0.379	0.815
1750	0.457	1.000	0.956	100	643.243	658.108	135.000	0.676	1.000	1.000	1.000
1751	0.457	1.000	0.956	100	445.946	658.784	135.000	0.676	1.000	1.000	1.000
1752	0.913	1.000	1.511	100	1110.811	658.784	153.435	0.676	2.000	0.500	1.000
1753	6.392	0.535	5.447	100	1105.405	662.162	29.745	2.627	2.658	0.376	0.683
1754	4.109	0.585	3.378	100	430.405	662.162	126.870	2.027	1.541	0.649	0.750
1755	64.372	0.159	26.003	97.163	1081.081	672.973	24.567	6.886	5.207	0.192	0.518
1756	2.283	0.764	3.022	100	327.027	662.838	153.435	1.351	2.610	0.383	0.769
1757	0.457	1.000	0.956	100	740.541	664.189	135.000	0.676	1.000	1.000	1.000
1758	0.457	1.000	0.956	100	1048.649	664.189	135.000	0.676	1.000	1.000	1.000
1759	0.457	1.000	0.956	100	340.541	664.865	135.000	0.676	1.000	1.000	1.000
1760	0.457	1.000	0.956	100	1026.351	664.865	135.000	0.676	1.000	1.000	1.000
1761	0.457	1.000	0.956	100	1108.108	664.865	135.000	0.676	1.000	1.000	1.000
1762	6.848	0.573	3.940	100	1046.622	666.216	149.036	3.378	1.079	0.927	0.714
1763	0.913	1.000	1.511	100	1067.568	666.216	153.435	0.676	2.000	0.500	1.000
1764	2.283	0.873	2.436	100	1077.027	666.216	123.690	1.351	1.653	0.605	0.833
1765	0.457	1.000	0.956	100	1108.108	666.892	135.000	0.676	1.000	1.000	1.000
1766	0.913	1.000	1.511	100	898.649	667.568	153.435	0.676	2.000	0.500	1.000
1767	1.826	0.740	2.786	100	1132.432	667.568	165.964	0.676	4.000	0.250	1.000
1768	0.457	1.000	0.956	100	1075.676	668.919	135.000	0.676	1.000	1.000	1.000
1769	0.913	1.000	1.511	100	1066.216	669.595	153.435	0.676	2.000	0.500	1.000
1770	1.370	0.967	2.137	100	1094.595	669.595	161.565	0.676	3.000	0.333	1.000
1771	9.587	0.666	6.043	100	115.541	675.676	63.435	2.568	2.842	0.352	0.840
1772	0.913	1.000	1.511	100	118.919	670.270	153.435	0.676	2.000	0.500	1.000
1773	0.457	1.000	0.956	100	156.757	673.649	135.000	0.676	1.000	1.000	1.000
1774	3.196	0.472	4.273	100	740.541	679.730	71.565	1.351	4.378	0.228	0.737
1775	0.457	1.000	0.956	100	1080.405	675.676	135.000	0.676	1.000	1.000	1.000
1776	7.761	0.667	5.447	100	114.189	681.081	60.255	2.295	2.613	0.383	0.773
1777	0.913	1.000	1.511	100	1075.000	676.351	153.435	0.676	2.000	0.500	1.000
1778	1.370	0.754	2.436	100	1079.054	678.378	33.690	1.209	2.702	0.370	0.667
1779	0.457	1.000	0.956	100	1095.270	677.027	135.000	0.676	1.000	1.000	1.000
1780	0.457	1.000	0.956	100	1070.270	677.703	135.000	0.676	1.000	1.000	1.000
1781	0.457	1.000	0.956	100	1073.649	677.703	135.000	0.676	1.000	1.000	1.000
1782	0.457	1.000	0.956	100	1086.486	677.703	135.000	0.676	1.000	1.000	1.000
1783	0.457	1.000	0.956	100	1091.892	678.378	135.000	0.676	1.000	1.000	1.000
1784	28.762	0.279	16.244	100	12.838	679.054	135.000	4.182	5.605	0.178	0.615
1785	0.457	1.000	0.956	100	1079.054	679.054	135.000	0.676	1.000	1.000	1.000
1786	0.913	1.000	1.511	100	1040.541	680.405	153.435	0.676	2.000	0.500	1.000
1787	0.457	1.000	0.956	100	1045.946	680.405	135.000	0.676	1.000	1.000	1.000
1788	3.652	0.914	3.378	100	196.622	681.081	126.870	1.911	1.939	0.516	0.842
1789	8.674	0.410	5.812	100	739.189	681.081	125.538	3.825	1.975	0.506	0.623
1790	0.913	1.000	1.511	100	745.946	681.757	153.435	0.676	2.000	0.500	1.000
1791	0.457	1.000	0.956	100	1110.811	681.757	135.000	0.676	1.000	1.000	1.000
1792	83.090	0.288	20.989	100	198.649	685.135	176.309	9.459	2.230	0.448	0.547
1793	0.457	1.000	0.956	100	491.216	682.432	135.000	0.676	1.000	1.000	1.000
1794	2.739	1.000	2.436	100	1037.838	682.432	146.310	1.351	1.500	0.667	1.000
1795	0.457	1.000	0.956	100	1112.838	682.432	135.000	0.676	1.000	1.000	1.000
1796	0.913	1.000	1.511	100	1116.892	682.432	153.435	0.676	2.000	0.500	1.000
1797	0.457	1.000	0.956	100	286.486	683.108	135.000	0.676	1.000	1.000	1.000
1798	3.196	0.943	3.022	100	745.946	684.459	26.565	1.351	1.936	0.517	0.933
1799	0.913	1.000	1.511	100	1102.703	683.108	116.565	0.676	2.000	0.500	1.000
1800	0.457	1.000	0.956	100	1110.811	683.108	135.000	0.676	1.000	1.000	1.000
1801	2.283	1.000	2.436	100	1114.189	684.459	33.690	1.351	1.553	0.644	0.909
1802	0.913	1.000	1.511	100	356.757	683.784	116.565	0.676	2.000	0.500	1.000
1803	0.457	1.000	0.956	100	1033.108	683.784	135.000	0.676	1.000	1.000	1.000
1804	5.935	0.846	3.940	100	306.757	687.162	30.964	2.703	1.389	0.720	0.812
1805	3.196	0.800	2.867	100	745.946	687.162	45.000	2.027	1.247	0.802	0.824
1806	0.913	1.000	1.511	100	1029.730	685.135	153.435	0.676	2.000	0.500	1.000
1807	2.283	0.354	3.639	100	1075.000	685.135	111.801	1.351	3.028	0.330	0.588
1808	1.826	0.857	2.436	100	1111.486	685.135	146.310	1.351	2.000	0.500	0.800
1809	0.913	1.000	1.511	100	1114.865	685.811	153.435	0.676	2.000	0.500	1.000
1810	20.088	0.399	9.411	100	533.784	687.162	158.962	4.488	1.894	0.528	0.710
1811	0.457	1.000	0.956	100	113.514	687.162	135.000	0.676	1.000	1.000	1.000
1812	3.196	0.564	2.867	100	740.541	687.162	135.000	2.027	1.033	0.968	0.700
1813	0.457	1.000	0.956	100	747.973	687.162	135.000	0.676	1.000	1.000	1.000
1814	0.457	1.000	0.956	100	615.541	687.838	135.000	0.676	1.000	1.000	1.000
1815	7.761	0.559	6.229	100	302.703	693.243	49.399	2.706	3.095	0.323	0.654
1816	107.743	0.315	28.730	100	1027.027	710.135	48.814	8.278	3.805	0.263	0.690
1817	0.457	1.000	0.956	100	1072.297	688.514	135.000	0.676	1.000	1.000	1.000
1818	2.283	0.599	3.445	100	1079.054	688.514	168.690	0.676	5.000	0.200	1.000
1819	1.826	1.000	1.911	100	307.432	689.189	135.000	1.351	1.000	1.000	1.000
1820	0.457	1.000	0.956	100	403.378	689.189	135.000	0.676	1.000	1.000	1.000
1821	0.457	1.000	0.956	100	740.541	689.865	135.000	0.676	1.000	1.000	1.000
1822	0.913	1.000	1.511	100	871.622	689.865	116.565	0.676	2.000	0.500	1.000
1823	0.457	1.000	0.956	100	1072.973	689.865	135.000	0.676	1.000	1.000	1.000
1824	0.913	1.000	1.511	100	493.243	690.541	116.565	0.676	2.000	0.500	1.000
1825	2.739	0.555	3.639	100	210.811	692.568	21.801	1.351	3.550	0.282	0.750
1826	3.652	0.914	3.022	100	225.676	691.892	153.435	2.027	1.416	0.706	0.800
1827	0.457	1.000	0.956	100	305.405	691.216	135.000	0.676	1.000	1.000	1.000
1828	2.739	0.769	3.378	100	381.757	693.243	36.870	1.513	2.778	0.360	0.706
1829	1.370	0.809	2.137	100	443.243	691.216	108.435	0.676	3.000	0.333	1.000
1830	0.913	1.000	1.511	100	471.622	691.216	116.565	0.676	2.000	0.500	1.000
1831	0.457	1.000	0.956	100	740.541	691.216	135.000	0.676	1.000	1.000	1.000
1832	0.457	1.000	0.956	100	1108.108	691.892	135.000	0.676	1.000	1.000	1.000
1833	0.457	1.000	0.956	100	448.649	693.243	135.000	0.676	1.000	1.000	1.000
1834	1.370	0.967	2.137	100	487.838	693.243	161.565	0.676	3.000	0.333	1.000
1835	0.457	1.000	0.956	100	740.541	693.243	135.000	0.676	1.000	1.000	1.000
1836	1.826	0.857	2.436	100	875.000	693.243	123.690	1.351	2.000	0.500	0.800
1837	0.913	1.000	1.511	100	740.541	694.595	153.435	0.676	2.000	0.500	1.000
1838	92.221	0.153	21.152	100	745.946	707.432	26.565	11.776	1.847	0.541	0.480
1839	0.913	1.000	1.511	100	1139.189	694.595	153.435	0.676	2.000	0.500	1.000
1840	0.457	1.000	0.956	100	95.270	695.270	135.000	0.676	1.000	1.000	1.000
1841	0.457	1.000	0.956	100	740.541	695.946	135.000	0.676	1.000	1.000	1.000
1842	0.457	1.000	0.956	100	95.270	696.622	135.000	0.676	1.000	1.000	1.000
1843	0.457	1.000	0.956	100	230.405	696.622	135.000	0.676	1.000	1.000	1.000
1844	0.457	1.000	0.956	100	1064.865	697.297	135.000	0.676	1.000	1.000	1.000
1845	0.457	1.000	0.956	100	1114.865	697.297	135.000	0.676	1.000	1.000	1.000
1846	0.457	1.000	0.956	100	941.216	697.973	135.000	0.676	1.000	1.000	1.000
1847	0.457	1.000	0.956	100	448.649	698.649	135.000	0.676	1.000	1.000	1.000
1848	0.457	1.000	0.956	100	735.135	698.649	135.000	0.676	1.000	1.000	1.000
1849	1.370	0.643	2.436	100	1107.432	698.649	123.690	1.209	2.702	0.370	0.667
1850	0.457	1.000	0.956	100	97.297	699.324	135.000	0.676	1.000	1.000	1.000
1851	0.913	1.000	1.511	100	275.000	699.324	153.435	0.676	2.000	0.500	1.000
1852	0.457	1.000	0.956	100	296.622	699.324	135.000	0.676	1.000	1.000	1.000
1853	0.913	1.000	1.511	100	736.486	699.324	153.435	0.676	2.000	0.500	1.000
1854	3.652	0.345	5.572	100	888.514	700.676	14.036	1.327	6.093	0.164	0.667
1855	17.348	0.226	11.486	100	1102.703	705.405	28.072	3.847	3.970	0.252	0.555
1856	0.457	1.000	0.956	100	110.135	700.676	135.000	0.676	1.000	1.000	1.000
1857	0.457	1.000	0.956	100	886.486	700.676	135.000	0.676	1.000	1.000	1.000
1858	0.457	1.000	0.956	100	897.297	700.676	135.000	0.676	1.000	1.000	1.000
1859	8.674	1.000	4.273	100	941.892	701.351	161.565	2.703	1.491	0.671	0.884
1860	3.652	0.710	3.639	100	236.486	701.351	158.199	2.027	1.794	0.557	0.696
1861	0.457	1.000	0.956	100	889.189	701.351	135.000	0.676	1.000	1.000	1.000
1862	1.826	0.740	2.786	100	372.297	702.027	165.964	0.676	4.000	0.250	1.000
1863	0.457	1.000	0.956	100	970.946	702.703	135.000	0.676	1.000	1.000	1.000
1864	0.457	1.000	0.956	100	1072.297	702.703	135.000	0.676	1.000	1.000	1.000
1865	3.652	0.588	4.273	100	370.270	704.730	18.435	1.351	3.432	0.291	0.800
1866	1.370	0.967	2.137	100	972.297	703.378	161.565	0.676	3.000	0.333	1.000
1867	0.457	1.000	0.956	100	362.162	704.054	135.000	0.676	1.000	1.000	1.000
1868	0.457	1.000	0.956	100	35.135	704.730	135.000	0.676	1.000	1.000	1.000
1869	0.913	1.000	1.511	100	543.243	704.730	116.565	0.676	2.000	0.500	1.000
1870	1.370	0.967	2.137	100	975.000	704.730	161.565	0.676	3.000	0.333	1.000
1871	1.370	0.967	2.137	100	742.568	705.405	161.565	0.676	3.000	0.333	1.000
1872	1.826	0.740	2.786	100	245.946	706.081	165.964	0.676	4.000	0.250	1.000
1873	5.935	0.427	4.872	100	288.514	706.081	146.310	2.703	1.676	0.597	0.667
1874	2.283	1.000	2.436	100	1057.432	706.081	146.310	1.351	1.553	0.644	0.909
1875	6.848	0.493	5.812	100	35.811	706.757	125.538	2.515	2.940	0.340	0.625
1876	0.457	1.000	0.956	100	134.459	706.757	135.000	0.676	1.000	1.000	1.000
1877	0.457	1.000	0.956	100	836.486	706.757	135.000	0.676	1.000	1.000	1.000
1878	1.370	1.000	1.911	100	237.162	707.432	135.000	1.351	1.464	0.683	0.857
1879	0.457	1.000	0.956	100	762.162	707.432	135.000	0.676	1.000	1.000	1.000
1880	0.457	1.000	0.956	100	886.486	707.432	135.000	0.676	1.000	1.000	1.000
1881	0.457	1.000	0.956	100	233.784	708.108	135.000	0.676	1.000	1.000	1.000
1882	0.457	1.000	0.956	100	421.622	708.108	135.000	0.676	1.000	1.000	1.000
1883	0.457	1.000	0.956	100	745.946	708.108	135.000	0.676	1.000	1.000	1.000
1884	1.370	0.967	2.137	100	1057.432	708.108	161.565	0.676	3.000	0.333	1.000
1885	0.457	1.000	0.956	100	35.811	708.784	135.000	0.676	1.000	1.000	1.000
1886	0.457	1.000	0.956	100	48.649	708.784	135.000	0.676	1.000	1.000	1.000
1887	0.457	1.000	0.956	100	239.189	708.784	135.000	0.676	1.000	1.000	1.000
1888	0.457	1.000	0.956	100	250.676	708.784	135.000	0.676	1.000	1.000	1.000
1889	842.312	0.095	100.267	97.995	687.838	773.649	39.806	32.638	3.120	0.321	0.387
1890	0.457	1.000	0.956	100	246.622	709.459	135.000	0.676	1.000	1.000	1.000
1891	0.457	1.000	0.956	100	289.865	709.459	135.000	0.676	1.000	1.000	1.000
1892	0.457	1.000	0.956	100	298.649	709.459	135.000	0.676	1.000	1.000	1.000
1893	0.457	1.000	0.956	100	1140.541	709.459	135.000	0.676	1.000	1.000	1.000
1894	0.457	1.000	0.956	100	237.838	710.135	135.000	0.676	1.000	1.000	1.000
1895	2.283	0.572	3.378	100	286.486	712.162	36.870	1.500	3.211	0.311	0.625
1896	8.218	0.808	5.277	100	1054.054	713.514	39.806	2.722	2.313	0.432	0.837
1897	30.588	0.484	11.082	100	920.946	718.919	37.569	5.641	2.147	0.466	0.660
1898	4.109	0.884	3.822	100	109.459	714.189	45.000	1.911	2.423	0.413	0.750
1899	0.913	1.000	1.511	100	328.378	711.486	153.435	0.676	2.000	0.500	1.000
1900	1.370	0.967	2.137	100	757.432	711.486	161.565	0.676	3.000	0.333	1.000
1901	0.457	1.000	0.956	100	1029.730	711.486	135.000	0.676	1.000	1.000	1.000
1902	1.826	0.740	2.786	100	990.541	712.162	165.964	0.676	4.000	0.250	1.000
1903	0.457	1.000	0.956	100	994.595	712.162	135.000	0.676	1.000	1.000	1.000
1904	1.826	0.740	2.786	100	1020.270	712.162	165.964	0.676	4.000	0.250	1.000
1905	48.850	0.401	15.759	100	950.000	721.622	30.964	7.424	2.555	0.391	0.639
1906	5.022	0.547	4.919	100	997.297	712.838	164.055	1.351	3.483	0.287	0.846
1907	76.242	0.168	21.632	98.204	1002.703	713.514	165.530	8.337	2.949	0.339	0.628
1908	4.109	0.923	3.639	100	1016.216	714.189	21.801	1.351	2.386	0.419	0.947
1909	0.913	1.000	1.511	100	1035.811	712.838	153.435	0.676	2.000	0.500	1.000
1910	0.457	1.000	0.956	100	8.108	713.514	135.000	0.676	1.000	1.000	1.000
1911	0.913	1.000	1.511	100	1105.405	713.514	153.435	0.676	2.000	0.500	1.000
1912	0.457	1.000	0.956	100	284.459	714.189	135.000	0.676	1.000	1.000	1.000
1913	0.913	1.000	1.511	100	316.892	714.865	153.435	0.676	2.000	0.500	1.000
1914	0.457	1.000	0.956	100	927.027	714.865	135.000	0.676	1.000	1.000	1.000
1915	0.457	1.000	0.956	100	140.541	716.216	135.000	0.676	1.000	1.000	1.000
1916	0.913	1.000	1.511	100	205.405	716.216	153.435	0.676	2.000	0.500	1.000
1917	1.370	0.967	2.137	100	314.865	716.216	161.565	0.676	3.000	0.333	1.000
1918	0.457	1.000	0.956	100	21.622	716.892	135.000	0.676	1.000	1.000	1.000
1919	0.457	1.000	0.956	100	313.514	716.892	135.000	0.676	1.000	1.000	1.000
1920	0.913	1.000	1.511	100	162.162	717.568	153.435	0.676	2.000	0.500	1.000
1921	3.196	0.348	3.639	100	270.270	720.270	21.801	2.027	1.561	0.641	0.583
1922	0.913	1.000	1.511	100	1032.432	718.243	153.435	0.676	2.000	0.500	1.000
1923	10.957	0.384	9.090	100	58.784	718.919	131.987	2.416	5.342	0.187	0.632
1924	3.196	0.455	4.273	100	387.162	720.270	18.435	1.967	2.662	0.376	0.560
1925	45.197	0.199	18.846	100	1020.270	723.649	14.534	7.432	3.840	0.260	0.491
1926	0.457	1.000	0.956	100	1140.541	718.919	135.000	0.676	1.000	1.000	1.000
1927	62.546	0.163	28.483	98.540	1101.351	730.405	22.306	4.924	8.826	0.113	0.516
1928	0.913	1.000	1.511	100	167.568	720.270	116.565	0.676	2.000	0.500	1.000
1929	0.913	1.000	1.511	100	250.000	720.270	153.435	0.676	2.000	0.500	1.000
1930	59.806	0.234	16.946	99.237	253.378	720.270	156.501	7.558	2.307	0.433	0.775
1931	0.457	1.000	0.956	100	391.892	720.270	135.000	0.676	1.000	1.000	1.000
1932	2.283	0.764	3.022	100	470.270	721.622	26.565	1.351	2.749	0.364	0.769
1933	1.826	1.000	1.911	100	1027.027	720.270	135.000	1.351	1.000	1.000	1.000
1934	1.826	1.000	1.911	100	136.486	720.946	135.000	1.351	1.000	1.000	1.000
1935	0.913	1.000	1.511	100	293.243	720.946	153.435	0.676	2.000	0.500	1.000
1936	7.305	0.265	7.054	100	383.784	723.649	16.699	2.703	3.362	0.297	0.508
1937	2.739	1.000	2.436	100	947.297	721.622	146.310	1.351	1.500	0.667	1.000
1938	2.283	0.764	3.022	100	1016.892	721.622	153.435	1.351	2.610	0.383	0.769
1939	373.448	0.210	44.168	99.022	883.784	760.811	60.690	19.142	3.363	0.297	0.608
1940	1.370	0.967	2.137	100	291.892	722.973	161.565	0.676	3.000	0.333	1.000
1941	0.457	1.000	0.956	100	570.270	722.973	135.000	0.676	1.000	1.000	1.000
1942	0.457	1.000	0.956	100	59.459	723.649	135.000	0.676	1.000	1.000	1.000
1943	0.457	1.000	0.956	100	420.946	723.649	135.000	0.676	1.000	1.000	1.000
1944	0.457	1.000	0.956	100	57.432	724.324	135.000	0.676	1.000	1.000	1.000
1945	0.457	1.000	0.956	100	134.459	724.324	135.000	0.676	1.000	1.000	1.000
1946	1.826	1.000	1.911	100	363.514	724.324	135.000	1.351	1.000	1.000	1.000
1947	0.457	1.000	0.956	100	390.541	724.324	135.000	0.676	1.000	1.000	1.000
1948	2.283	0.674	3.022	100	132.432	728.378	63.435	1.351	2.610	0.383	0.769
1949	6.848	0.317	6.374	100	570.270	725.676	122.005	2.867	3.191	0.313	0.484
1950	1.370	0.754	2.436	100	187.838	728.378	33.690	1.209	2.702	0.370	0.667
1951	0.457	1.000	0.956	100	1086.486	727.027	135.000	0.676	1.000	1.000	1.000
1952	0.913	1.000	1.511	100	1110.811	727.027	153.435	0.676	2.000	0.500	1.000
1953	1.826	0.740	2.786	100	472.973	727.703	165.964	0.676	4.000	0.250	1.000
1954	0.913	1.000	1.511	100	568.243	727.703	153.435	0.676	2.000	0.500	1.000
1955	9.131	0.312	8.547	100	168.919	731.757	18.435	2.568	4.651	0.215	0.556
1956	1.370	0.967	2.137	100	347.297	729.054	161.565	0.676	3.000	0.333	1.000
1957	0.913	1.000	1.511	100	568.919	729.054	153.435	0.676	2.000	0.500	1.000
1958	2.739	0.377	3.940	100	129.054	733.108	59.036	1.925	2.390	0.418	0.522
1959	0.457	1.000	0.956	100	378.378	729.730	135.000	0.676	1.000	1.000	1.000
1960	1.826	0.611	3.022	100	273.649	730.405	153.435	1.284	3.093	0.323	0.667
1961	0.913	1.000	1.511	100	278.378	730.405	153.435	0.676	2.000	0.500	1.000
1962	0.457	1.000	0.956	100	1081.081	730.405	135.000	0.676	1.000	1.000	1.000
1963	1.370	0.754	2.436	100	277.027	731.757	146.310	1.209	2.702	0.370	0.667
1964	0.457	1.000	0.956	100	421.622	731.757	135.000	0.676	1.000	1.000	1.000
1965	32.871	0.265	13.913	95.833	320.946	732.432	119.055	5.677	2.628	0.381	0.514
1966	0.457	1.000	0.956	100	366.892	732.432	135.000	0.676	1.000	1.000	1.000
1967	1.826	1.000	1.911	100	551.351	732.432	135.000	1.351	1.000	1.000	1.000
1968	0.457	1.000	0.956	100	572.973	732.432	135.000	0.676	1.000	1.000	1.000
1969	0.457	1.000	0.956	100	918.919	732.432	135.000	0.676	1.000	1.000	1.000
1970	0.457	1.000	0.956	100	1083.108	733.784	135.000	0.676	1.000	1.000	1.000
1971	0.913	1.000	1.511	100	1101.351	733.784	153.435	0.676	2.000	0.500	1.000
1972	0.457	1.000	0.956	100	551.351	734.459	135.000	0.676	1.000	1.000	1.000
1973	0.913	1.000	1.511	100	299.324	735.811	153.435	0.676	2.000	0.500	1.000
1974	0.457	1.000	0.956	100	580.405	735.811	135.000	0.676	1.000	1.000	1.000
1975	0.457	1.000	0.956	100	302.703	737.162	135.000	0.676	1.000	1.000	1.000
1976	0.457	1.000	0.956	100	862.838	737.838	135.000	0.676	1.000	1.000	1.000
1977	0.457	1.000	0.956	100	305.405	738.514	135.000	0.676	1.000	1.000	1.000
1978	2.283	0.513	3.639	100	335.135	738.514	158.199	1.284	4.051	0.247	0.667
1979	2.283	0.513	3.639	100	443.243	739.865	21.801	1.311	3.678	0.272	0.667
1980	0.913	1.000	1.511	100	448.649	738.514	153.435	0.676	2.000	0.500	1.000
1981	1.826	0.740	2.786	100	883.108	738.514	165.964	0.676	4.000	0.250	1.000
1982	2.739	1.000	2.436	100	1070.270	738.514	123.690	1.351	1.500	0.667	1.000
1983	0.457	1.000	0.956	100	447.297	739.189	135.000	0.676	1.000	1.000	1.000
1984	2.283	0.674	3.022	100	308.108	739.865	153.435	1.351	2.749	0.364	0.769
1985	0.457	1.000	0.956	100	312.838	740.541	135.000	0.676	1.000	1.000	1.000
1986	0.457	1.000	0.956	100	453.378	740.541	135.000	0.676	1.000	1.000	1.000
1987	0.457	1.000	0.956	100	551.351	740.541	135.000	0.676	1.000	1.000	1.000
1988	0.457	1.000	0.956	100	448.649	741.216	135.000	0.676	1.000	1.000	1.000
1989	0.913	1.000	1.511	100	637.838	741.216	153.435	0.676	2.000	0.500	1.000
1990	0.457	1.000	0.956	100	329.730	741.892	135.000	0.676	1.000	1.000	1.000
1991	12.327	0.458	7.277	100	18.243	742.568	111.801	3.278	2.658	0.376	0.701
1992	0.457	1.000	0.956	100	327.703	742.568	135.000	0.676	1.000	1.000	1.000
1993	0.913	1.000	1.511	100	1011.486	742.568	153.435	0.676	2.000	0.500	1.000
1994	0.913	1.000	1.511	100	329.730	743.243	153.435	0.676	2.000	0.500	1.000
1995	0.457	1.000	0.956	100	140.541	743.919	135.000	0.676	1.000	1.000	1.000
1996	0.457	1.000	0.956	100	1026.351	744.595	135.000	0.676	1.000	1.000	1.000
1997	0.913	1.000	1.511	100	58.108	745.270	153.435	0.676	2.000	0.500	1.000
1998	0.913	1.000	1.511	100	120.946	745.270	153.435	0.676	2.000	0.500	1.000
1999	1.826	0.611	3.022	100	237.162	746.622	26.565	1.209	3.493	0.286	0.667
[truncated: 120 more rows]
