# Supplementary material for: Microwave Dielectric Properties of CCTO/PVA Composites
Source: Hindawi journal article supplement (doi:10.1155/2018/6067519), 2018-01-01
Supplement: f1 [file 6067519.f1.zip › 6067519.f1/2_Porosidade_PVA_CCTO_20_100X.xls]

Slice	Count	Total Area	Average Size	%Area	Circ.	Solidity	Feret	FeretX	FeretY	FeretAngle	MinFeret
pva_ccto_20x100_sembarra.tif	4553	37430.150	8.221	4.113	0.863	0.897	3.310	564.212	405.809	122.093	1.532
