# Supplementary material for: Microwave Dielectric Properties of CCTO/PVA Composites
Source: Hindawi journal article supplement (doi:10.1155/2018/6067519), 2018-01-01
Supplement: f1 [file 6067519.f1.zip › 6067519.f1/2b_Poros_total_PVA_CCTO_20_100X.xls]

	Area	Circ.	Feret	%Area	FeretX	FeretY	FeretAngle	MinFeret	AR	Round	Solidity
1	0.457	1.000	0.956	100	145.946	0.676	135.000	0.676	1.000	1.000	1.000
2	2.283	1.000	2.436	100	491.216	0.676	146.310	1.351	1.553	0.644	0.909
3	0.913	1.000	1.511	100	821.622	0.676	153.435	0.676	2.000	0.500	1.000
4	5.478	0.643	4.326	100	97.297	4.054	38.660	2.703	1.542	0.648	0.774
5	5.022	0.547	5.146	100	106.757	3.378	23.199	1.861	3.334	0.300	0.710
6	3.652	0.539	4.273	100	494.595	2.703	18.435	1.351	3.759	0.266	0.800
7	0.457	1.000	0.956	100	814.189	1.351	135.000	0.676	1.000	1.000	1.000
8	0.913	1.000	1.511	100	1091.892	1.351	153.435	0.676	2.000	0.500	1.000
9	0.457	1.000	0.956	100	1.351	2.027	135.000	0.676	1.000	1.000	1.000
10	0.913	1.000	1.511	100	14.865	2.027	153.435	0.676	2.000	0.500	1.000
11	4.565	0.806	3.639	100	142.568	2.027	111.801	2.027	1.894	0.528	0.833
12	6.848	0.647	5.146	100	820.946	4.054	23.199	2.027	2.804	0.357	0.857
13	1.826	0.857	2.436	100	818.243	2.703	123.690	1.351	2.031	0.492	0.800
14	0.457	1.000	0.956	100	4.730	3.378	135.000	0.676	1.000	1.000	1.000
15	5.022	0.976	3.822	100	103.378	6.081	45.000	2.389	1.714	0.583	0.846
16	0.457	1.000	0.956	100	145.946	3.378	135.000	0.676	1.000	1.000	1.000
17	1.826	1.000	2.436	100	496.622	4.730	33.690	1.351	2.031	0.492	0.800
18	0.457	1.000	0.956	100	1138.514	3.378	135.000	0.676	1.000	1.000	1.000
19	6.848	0.573	4.872	100	86.486	4.054	146.310	2.814	2.225	0.450	0.682
20	5.935	0.627	4.872	100	210.811	8.108	56.310	2.565	2.225	0.450	0.722
21	0.913	1.000	1.511	100	3.378	4.730	153.435	0.676	2.000	0.500	1.000
22	0.913	1.000	1.511	100	450.676	4.730	153.435	0.676	2.000	0.500	1.000
23	0.913	1.000	1.511	100	91.892	5.405	153.435	0.676	2.000	0.500	1.000
24	0.457	1.000	0.956	100	136.486	5.405	135.000	0.676	1.000	1.000	1.000
25	1.826	0.740	2.786	100	381.757	5.405	165.964	0.676	4.000	0.250	1.000
26	0.457	1.000	0.956	100	562.162	5.405	135.000	0.676	1.000	1.000	1.000
27	1.826	0.740	2.786	100	821.622	5.405	165.964	0.676	4.000	0.250	1.000
28	0.457	1.000	0.956	100	143.243	6.081	135.000	0.676	1.000	1.000	1.000
29	3.196	0.515	4.110	100	494.595	6.757	170.538	1.351	3.856	0.259	0.737
30	0.457	1.000	0.956	100	556.081	6.081	135.000	0.676	1.000	1.000	1.000
31	0.457	1.000	0.956	100	614.189	6.081	135.000	0.676	1.000	1.000	1.000
32	4.565	0.358	5.773	100	880.405	8.108	20.556	1.594	4.773	0.210	0.606
33	1.370	0.967	2.137	100	383.784	6.757	161.565	0.676	3.000	0.333	1.000
34	0.913	1.000	1.511	100	1133.108	6.757	153.435	0.676	2.000	0.500	1.000
35	7.761	0.414	6.229	100	577.703	10.135	12.529	2.703	3.226	0.310	0.630
36	4.109	0.726	3.940	100	779.730	10.811	59.036	1.814	2.627	0.381	0.783
37	12.783	0.239	10.916	100	77.703	12.162	21.801	2.992	4.607	0.217	0.589
38	0.913	1.000	1.511	100	185.811	8.108	153.435	0.676	2.000	0.500	1.000
39	0.457	1.000	0.956	100	324.324	8.108	135.000	0.676	1.000	1.000	1.000
40	0.913	1.000	1.511	100	495.946	8.108	153.435	0.676	2.000	0.500	1.000
41	5.935	0.454	6.229	100	841.892	8.108	139.399	1.911	4.195	0.238	0.634
42	0.457	1.000	0.956	100	884.459	8.108	135.000	0.676	1.000	1.000	1.000
43	0.457	1.000	0.956	100	945.270	8.108	135.000	0.676	1.000	1.000	1.000
44	0.457	1.000	0.956	100	981.757	8.108	135.000	0.676	1.000	1.000	1.000
45	333.272	0.258	41.914	95.205	319.595	32.432	20.772	17.469	3.039	0.329	0.660
46	0.457	1.000	0.956	100	584.459	8.784	135.000	0.676	1.000	1.000	1.000
47	0.913	1.000	1.511	100	586.486	8.784	153.435	0.676	2.000	0.500	1.000
48	0.457	1.000	0.956	100	1140.541	8.784	135.000	0.676	1.000	1.000	1.000
49	9.587	0.527	5.447	100	497.973	14.189	60.255	4.001	1.239	0.807	0.636
50	2.739	1.000	2.436	100	854.730	9.459	146.310	1.351	1.500	0.667	1.000
51	3.652	0.710	3.822	100	883.108	12.838	45.000	1.911	2.429	0.412	0.762
52	0.457	1.000	0.956	100	1137.838	10.811	135.000	0.676	1.000	1.000	1.000
53	1.370	1.000	1.911	100	778.378	12.838	45.000	1.351	1.464	0.683	0.857
54	0.457	1.000	0.956	100	1113.514	12.162	135.000	0.676	1.000	1.000	1.000
55	0.457	1.000	0.956	100	724.324	12.838	135.000	0.676	1.000	1.000	1.000
56	1.370	0.967	2.137	100	1109.459	12.838	161.565	0.676	3.000	0.333	1.000
57	1.370	1.000	1.911	100	351.351	15.541	45.000	1.351	1.464	0.683	0.857
58	2.283	0.674	3.022	100	500.000	16.892	63.435	1.351	2.749	0.364	0.769
59	1.826	1.000	1.911	100	924.324	14.189	135.000	1.351	1.000	1.000	1.000
60	0.457	1.000	0.956	100	443.243	14.865	135.000	0.676	1.000	1.000	1.000
61	0.457	1.000	0.956	100	643.243	14.865	135.000	0.676	1.000	1.000	1.000
62	4.565	0.449	3.822	100	722.297	17.568	45.000	2.703	1.524	0.656	0.690
63	3.196	1.000	2.436	100	243.243	15.541	123.690	2.027	1.069	0.936	0.875
64	0.913	1.000	1.511	100	756.757	15.541	116.565	0.676	2.000	0.500	1.000
65	25.110	0.338	11.506	100	63.514	16.216	130.236	5.543	2.434	0.411	0.595
66	0.457	1.000	0.956	100	75.676	16.216	135.000	0.676	1.000	1.000	1.000
67	1.826	1.000	1.911	100	610.135	16.216	135.000	1.351	1.000	1.000	1.000
68	0.457	1.000	0.956	100	912.838	16.216	135.000	0.676	1.000	1.000	1.000
69	28.762	0.755	8.810	100	776.351	25.000	57.529	5.405	1.818	0.550	0.851
70	0.457	1.000	0.956	100	897.297	16.892	135.000	0.676	1.000	1.000	1.000
71	0.457	1.000	0.956	100	135.135	17.568	135.000	0.676	1.000	1.000	1.000
72	2.283	0.764	3.022	100	239.189	18.919	26.565	1.351	2.610	0.383	0.769
73	0.913	1.000	1.511	100	258.108	17.568	153.435	0.676	2.000	0.500	1.000
74	0.457	1.000	0.956	100	756.081	17.568	135.000	0.676	1.000	1.000	1.000
75	0.457	1.000	0.956	100	907.432	17.568	135.000	0.676	1.000	1.000	1.000
76	3.196	0.496	4.326	100	1064.189	20.270	38.660	1.911	3.212	0.311	0.560
77	14.609	0.272	9.015	100	1072.973	18.243	167.005	2.703	3.051	0.328	0.727
78	3.196	0.800	3.022	100	911.486	18.919	153.435	2.027	1.329	0.752	0.737
79	0.913	1.000	1.511	100	135.135	18.919	153.435	0.676	2.000	0.500	1.000
80	0.457	1.000	0.956	100	139.865	18.919	135.000	0.676	1.000	1.000	1.000
81	0.913	1.000	1.511	100	170.946	18.919	116.565	0.676	2.000	0.500	1.000
82	0.457	1.000	0.956	100	242.568	18.919	135.000	0.676	1.000	1.000	1.000
83	8.218	0.808	5.277	100	259.459	18.919	140.194	2.722	2.175	0.460	0.837
84	0.913	1.000	1.511	100	722.297	18.919	153.435	0.676	2.000	0.500	1.000
85	1.370	1.000	1.911	100	237.838	19.595	135.000	1.351	1.464	0.683	0.857
86	0.457	1.000	0.956	100	756.081	19.595	135.000	0.676	1.000	1.000	1.000
87	1.826	0.698	2.867	100	482.432	22.297	45.000	1.433	2.654	0.377	0.667
88	79.438	0.611	12.820	98.276	550.676	32.432	71.565	10.515	1.156	0.865	0.821
89	33.784	0.441	10.314	100	607.432	21.622	148.392	5.291	2.173	0.460	0.747
90	1.370	1.000	1.911	100	199.324	20.946	135.000	1.351	1.464	0.683	0.857
91	11.870	0.423	6.410	100	362.162	20.946	108.435	3.555	2.054	0.487	0.650
92	18.718	0.740	7.554	100	864.189	20.946	153.435	4.145	1.851	0.540	0.796
93	55.241	0.293	18.181	100	871.622	20.946	131.987	6.839	3.251	0.308	0.658
94	0.457	1.000	0.956	100	470.270	21.622	135.000	0.676	1.000	1.000	1.000
95	0.457	1.000	0.956	100	756.081	21.622	135.000	0.676	1.000	1.000	1.000
96	0.457	1.000	0.956	100	772.973	21.622	135.000	0.676	1.000	1.000	1.000
97	0.913	1.000	1.511	100	917.568	21.622	153.435	0.676	2.000	0.500	1.000
98	44.284	0.278	17.226	100	499.324	22.297	101.310	4.054	4.713	0.212	0.698
99	3.652	0.914	3.022	100	39.189	24.324	26.565	2.027	1.435	0.697	0.842
100	3.652	0.820	3.378	100	189.189	25.676	53.130	2.027	1.767	0.566	0.842
101	0.457	1.000	0.956	100	264.189	22.973	135.000	0.676	1.000	1.000	1.000
102	0.457	1.000	0.956	100	286.486	22.973	135.000	0.676	1.000	1.000	1.000
103	0.913	1.000	1.511	100	477.703	22.973	153.435	0.676	2.000	0.500	1.000
104	8.218	0.416	6.410	100	478.378	25.000	18.435	2.703	2.639	0.379	0.692
105	6.848	0.612	5.277	100	58.784	28.378	50.194	2.389	2.386	0.419	0.714
106	140.614	0.302	27.801	99.351	1053.378	36.486	25.942	10.049	3.437	0.291	0.732
107	4.109	1.000	3.022	100	12.838	27.027	26.565	2.027	1.340	0.746	0.857
108	0.457	1.000	0.956	100	16.216	25.000	135.000	0.676	1.000	1.000	1.000
109	1.826	0.645	2.786	100	754.730	25.000	104.036	0.676	4.000	0.250	1.000
110	1.826	0.513	3.378	100	520.270	27.703	36.870	1.316	3.850	0.260	0.571
111	6.848	0.654	5.277	100	772.973	29.730	39.806	2.389	2.731	0.366	0.698
112	0.457	1.000	0.956	100	5.405	27.027	135.000	0.676	1.000	1.000	1.000
113	0.457	1.000	0.956	100	10.811	27.027	135.000	0.676	1.000	1.000	1.000
114	0.457	1.000	0.956	100	286.486	27.027	135.000	0.676	1.000	1.000	1.000
115	0.913	1.000	1.511	100	430.405	27.027	153.435	0.676	2.000	0.500	1.000
116	0.457	1.000	0.956	100	1027.027	27.027	135.000	0.676	1.000	1.000	1.000
117	1.826	0.611	3.022	100	1108.108	28.378	26.565	1.209	3.493	0.286	0.667
118	0.457	1.000	0.956	100	135.135	27.703	135.000	0.676	1.000	1.000	1.000
119	0.457	1.000	0.956	100	232.432	27.703	135.000	0.676	1.000	1.000	1.000
120	2.283	0.873	2.867	100	221.622	28.378	135.000	1.433	2.308	0.433	0.769
121	2.283	0.764	2.786	100	942.568	28.378	165.964	1.351	2.188	0.457	0.769
122	3.652	0.710	3.445	100	609.459	29.730	168.690	1.925	2.047	0.488	0.696
123	1.370	0.967	2.137	100	311.486	29.730	161.565	0.676	3.000	0.333	1.000
124	6.392	0.629	5.447	100	353.378	29.730	150.255	2.254	3.023	0.331	0.737
125	3.196	0.621	3.378	100	228.378	30.405	143.130	2.027	1.560	0.641	0.700
126	12.327	0.274	9.674	100	272.973	34.459	24.775	3.501	3.656	0.274	0.587
127	0.913	0.785	1.911	100	199.324	31.081	135.000	0.956	2.646	0.378	0.667
128	0.913	1.000	1.511	100	232.432	31.081	153.435	0.676	2.000	0.500	1.000
129	44.741	0.213	18.356	100	546.622	49.324	83.660	6.571	3.690	0.271	0.503
130	180.789	0.241	33.053	98.990	747.297	57.432	49.145	10.842	3.887	0.257	0.644
131	0.457	1.000	0.956	100	572.973	31.757	135.000	0.676	1.000	1.000	1.000
132	65.741	0.238	25.000	100	591.216	41.216	18.925	5.383	5.794	0.173	0.659
133	16.435	0.299	11.486	100	231.757	32.432	151.928	3.550	4.515	0.222	0.518
134	0.457	1.000	0.956	100	69.595	33.108	135.000	0.676	1.000	1.000	1.000
135	0.457	1.000	0.956	100	721.622	33.108	135.000	0.676	1.000	1.000	1.000
136	0.457	1.000	0.956	100	616.216	33.784	135.000	0.676	1.000	1.000	1.000
137	0.913	1.000	1.511	100	589.189	34.459	153.435	0.676	2.000	0.500	1.000
138	26.023	0.265	16.018	100	258.108	42.568	27.646	3.637	5.266	0.190	0.600
139	0.457	1.000	0.956	100	427.027	35.811	135.000	0.676	1.000	1.000	1.000
140	0.457	1.000	0.956	100	1145.946	35.811	135.000	0.676	1.000	1.000	1.000
141	0.913	1.000	1.511	100	631.081	36.486	153.435	0.676	2.000	0.500	1.000
142	50.676	0.249	14.880	100	627.027	37.838	140.528	8.116	2.330	0.429	0.569
143	42.458	0.424	15.319	100	875.676	37.162	138.576	6.084	3.055	0.327	0.686
144	1.370	0.809	2.137	100	43.243	37.838	108.435	0.676	3.000	0.333	1.000
145	5.935	1.000	3.940	100	243.243	37.838	149.036	2.027	1.796	0.557	0.929
146	3.652	0.503	3.445	100	247.973	37.838	101.310	2.565	1.460	0.685	0.571
147	1.826	1.000	1.911	100	75.676	39.189	135.000	1.351	1.000	1.000	1.000
148	0.457	1.000	0.956	100	259.459	39.189	135.000	0.676	1.000	1.000	1.000
149	0.457	1.000	0.956	100	568.919	39.189	135.000	0.676	1.000	1.000	1.000
150	0.913	1.000	1.511	100	501.351	39.865	153.435	0.676	2.000	0.500	1.000
151	0.457	1.000	0.956	100	1041.216	39.865	135.000	0.676	1.000	1.000	1.000
152	9.131	0.784	4.778	100	350.000	43.919	45.000	3.378	1.267	0.789	0.800
153	1.370	0.967	2.137	100	429.730	40.541	161.565	0.676	3.000	0.333	1.000
154	0.457	1.000	0.956	100	43.243	41.216	135.000	0.676	1.000	1.000	1.000
155	0.913	1.000	1.511	100	47.297	41.216	153.435	0.676	2.000	0.500	1.000
156	7.305	0.719	5.277	100	505.405	41.216	140.194	2.814	2.391	0.418	0.762
157	2.283	1.000	2.436	100	394.595	41.892	146.310	1.351	1.553	0.644	0.909
158	23.283	0.278	14.957	100	575.676	46.622	18.435	2.955	6.155	0.162	0.718
159	0.457	1.000	0.956	100	404.730	42.568	135.000	0.676	1.000	1.000	1.000
160	0.913	1.000	1.511	100	406.757	42.568	153.435	0.676	2.000	0.500	1.000
161	0.457	1.000	0.956	100	434.459	42.568	135.000	0.676	1.000	1.000	1.000
162	0.457	1.000	0.956	100	1033.784	42.568	135.000	0.676	1.000	1.000	1.000
163	0.457	1.000	0.956	100	1145.270	42.568	135.000	0.676	1.000	1.000	1.000
164	2.739	1.000	2.436	100	32.432	43.243	123.690	1.351	1.500	0.667	1.000
165	0.913	1.000	1.511	100	81.081	43.243	153.435	0.676	2.000	0.500	1.000
166	0.913	1.000	1.511	100	207.432	43.243	153.435	0.676	2.000	0.500	1.000
167	0.457	1.000	0.956	100	340.541	43.243	135.000	0.676	1.000	1.000	1.000
168	9.587	0.372	8.248	100	354.730	43.919	145.008	2.706	4.103	0.244	0.575
169	0.913	1.000	1.511	100	435.811	43.243	153.435	0.676	2.000	0.500	1.000
170	0.457	1.000	0.956	100	620.946	43.243	135.000	0.676	1.000	1.000	1.000
171	0.913	1.000	1.511	100	175.676	43.919	116.565	0.676	2.000	0.500	1.000
172	0.913	1.000	1.511	100	237.838	43.919	153.435	0.676	2.000	0.500	1.000
173	0.457	1.000	0.956	100	439.189	43.919	135.000	0.676	1.000	1.000	1.000
174	1.370	0.967	2.137	100	1030.405	44.595	161.565	0.676	3.000	0.333	1.000
175	0.457	1.000	0.956	100	294.595	45.270	135.000	0.676	1.000	1.000	1.000
176	2.283	1.000	2.436	100	376.351	45.270	146.310	1.351	1.553	0.644	0.909
177	0.457	1.000	0.956	100	1027.027	45.270	135.000	0.676	1.000	1.000	1.000
178	4.565	0.419	5.277	100	1140.541	49.324	50.194	2.223	2.923	0.342	0.556
179	0.457	1.000	0.956	100	189.189	45.946	135.000	0.676	1.000	1.000	1.000
180	0.913	1.000	1.511	100	239.189	45.946	153.435	0.676	2.000	0.500	1.000
181	0.913	1.000	1.511	100	256.081	45.946	116.565	0.676	2.000	0.500	1.000
182	0.913	1.000	1.511	100	1081.081	45.946	153.435	0.676	2.000	0.500	1.000
183	5.478	0.441	5.572	100	877.703	46.622	104.036	2.027	3.154	0.317	0.686
184	2.739	1.000	2.436	100	170.946	47.297	123.690	1.351	1.500	0.667	1.000
185	0.913	1.000	1.511	100	222.973	47.973	153.435	0.676	2.000	0.500	1.000
186	5.935	0.371	6.757	100	289.189	53.378	53.130	2.255	4.249	0.235	0.520
187	0.913	1.000	1.511	100	641.216	47.973	153.435	0.676	2.000	0.500	1.000
188	0.457	1.000	0.956	100	643.243	47.973	135.000	0.676	1.000	1.000	1.000
189	5.022	0.976	3.378	100	889.189	47.973	126.870	2.389	1.450	0.689	0.846
190	1.826	0.857	2.436	100	82.432	50.676	56.310	1.351	2.031	0.492	0.800
191	0.457	1.000	0.956	100	140.541	48.649	135.000	0.676	1.000	1.000	1.000
192	0.457	1.000	0.956	100	214.189	48.649	135.000	0.676	1.000	1.000	1.000
193	0.457	1.000	0.956	100	242.568	48.649	135.000	0.676	1.000	1.000	1.000
194	1.370	0.524	2.867	100	441.216	48.649	135.000	0.956	4.123	0.243	0.600
195	0.457	1.000	0.956	100	837.838	48.649	135.000	0.676	1.000	1.000	1.000
196	0.457	1.000	0.956	100	1075.000	48.649	135.000	0.676	1.000	1.000	1.000
197	0.457	1.000	0.956	100	325.676	49.324	135.000	0.676	1.000	1.000	1.000
198	0.913	1.000	1.511	100	643.243	49.324	153.435	0.676	2.000	0.500	1.000
199	0.913	1.000	1.511	100	881.081	49.324	116.565	0.676	2.000	0.500	1.000
200	0.457	1.000	0.956	100	54.054	50.000	135.000	0.676	1.000	1.000	1.000
201	0.457	1.000	0.956	100	129.730	50.000	135.000	0.676	1.000	1.000	1.000
202	0.457	1.000	0.956	100	216.216	50.000	135.000	0.676	1.000	1.000	1.000
203	1.826	1.000	1.911	100	244.595	50.000	135.000	1.351	1.000	1.000	1.000
204	0.913	1.000	1.511	100	362.162	50.000	153.435	0.676	2.000	0.500	1.000
205	0.457	1.000	0.956	100	381.757	50.000	135.000	0.676	1.000	1.000	1.000
206	0.457	1.000	0.956	100	454.054	50.000	135.000	0.676	1.000	1.000	1.000
207	0.457	1.000	0.956	100	567.568	50.000	135.000	0.676	1.000	1.000	1.000
208	0.913	1.000	1.511	100	1108.784	50.000	153.435	0.676	2.000	0.500	1.000
209	0.457	1.000	0.956	100	178.378	50.676	135.000	0.676	1.000	1.000	1.000
210	2.739	0.532	3.940	100	383.108	50.676	149.036	1.476	3.503	0.285	0.600
211	0.457	1.000	0.956	100	459.459	50.676	135.000	0.676	1.000	1.000	1.000
212	1.826	1.000	1.911	100	217.568	51.351	135.000	1.351	1.000	1.000	1.000
213	0.457	1.000	0.956	100	364.865	51.351	135.000	0.676	1.000	1.000	1.000
214	2.283	0.764	3.022	100	406.081	52.703	26.565	1.351	2.610	0.383	0.769
215	0.457	1.000	0.956	100	443.243	51.351	135.000	0.676	1.000	1.000	1.000
216	0.457	1.000	0.956	100	837.838	51.351	135.000	0.676	1.000	1.000	1.000
217	0.457	1.000	0.956	100	891.892	52.027	135.000	0.676	1.000	1.000	1.000
218	0.457	1.000	0.956	100	366.892	52.703	135.000	0.676	1.000	1.000	1.000
219	7.305	0.611	5.812	100	387.162	52.703	125.538	2.420	3.367	0.297	0.711
220	0.913	1.000	1.511	100	1108.784	52.703	153.435	0.676	2.000	0.500	1.000
221	0.457	1.000	0.956	100	196.622	53.378	135.000	0.676	1.000	1.000	1.000
222	2.283	0.873	2.436	100	253.378	54.730	33.690	1.814	1.496	0.668	0.714
223	2.739	1.000	2.436	100	445.946	53.378	123.690	1.351	1.500	0.667	1.000
224	2.739	1.000	2.436	100	286.486	54.054	146.310	1.351	1.500	0.667	1.000
225	0.457	1.000	0.956	100	340.541	54.054	135.000	0.676	1.000	1.000	1.000
226	0.457	1.000	0.956	100	156.757	54.730	135.000	0.676	1.000	1.000	1.000
227	0.913	1.000	1.511	100	367.568	54.730	153.435	0.676	2.000	0.500	1.000
228	8.218	0.498	6.043	100	1091.892	54.730	153.435	2.459	2.702	0.370	0.735
229	3.196	0.800	2.867	100	168.243	55.405	135.000	2.027	1.267	0.790	0.778
230	7.305	0.795	4.778	100	178.378	55.405	135.000	2.992	1.642	0.609	0.800
231	1.370	1.000	1.911	100	880.405	55.405	135.000	1.351	1.464	0.683	0.857
232	31.501	0.231	16.892	97.101	77.027	56.081	126.870	4.813	5.289	0.189	0.489
233	0.457	1.000	0.956	100	155.405	56.081	135.000	0.676	1.000	1.000	1.000
234	6.392	0.911	4.326	100	250.000	59.459	51.340	2.419	1.950	0.513	0.848
235	3.196	0.898	3.378	100	283.108	58.108	36.870	1.911	2.041	0.490	0.778
236	4.109	0.585	4.533	100	448.649	56.081	153.435	1.814	3.273	0.306	0.720
237	2.283	0.873	2.867	100	679.730	58.108	45.000	1.433	2.308	0.433	0.769
238	1.826	0.611	3.022	100	235.811	56.757	153.435	1.284	3.093	0.323	0.667
239	0.457	1.000	0.956	100	353.378	56.757	135.000	0.676	1.000	1.000	1.000
240	0.457	1.000	0.956	100	369.595	56.757	135.000	0.676	1.000	1.000	1.000
241	0.913	0.785	1.911	100	607.432	56.757	135.000	0.956	2.646	0.378	0.667
242	0.913	1.000	1.511	100	881.081	57.432	116.565	0.676	2.000	0.500	1.000
243	2.283	1.000	2.436	100	370.270	58.108	123.690	1.351	1.553	0.644	0.909
244	0.457	1.000	0.956	100	442.568	58.108	135.000	0.676	1.000	1.000	1.000
245	8.218	0.895	4.533	100	745.946	60.135	26.565	2.703	1.659	0.603	0.878
246	0.457	1.000	0.956	100	1016.216	58.108	135.000	0.676	1.000	1.000	1.000
247	0.913	1.000	1.511	100	1135.135	58.108	116.565	0.676	2.000	0.500	1.000
248	0.913	1.000	1.511	100	60.811	58.784	153.435	0.676	2.000	0.500	1.000
249	0.457	1.000	0.956	100	187.838	58.784	135.000	0.676	1.000	1.000	1.000
250	3.196	0.898	3.378	100	452.703	58.784	143.130	1.814	2.339	0.427	0.778
251	0.913	1.000	1.511	100	567.568	58.784	153.435	0.676	2.000	0.500	1.000
252	8.218	0.734	4.533	100	679.730	62.838	63.435	2.703	1.579	0.633	0.818
253	0.457	1.000	0.956	100	1098.649	58.784	135.000	0.676	1.000	1.000	1.000
254	0.457	1.000	0.956	100	62.838	59.459	135.000	0.676	1.000	1.000	1.000
255	1.370	1.000	1.911	100	189.189	60.811	45.000	1.351	1.464	0.683	0.857
256	1.826	1.000	2.436	100	279.730	60.811	33.690	1.351	2.031	0.492	0.800
257	14.153	0.613	5.812	100	524.324	64.865	54.462	4.730	1.217	0.822	0.721
258	0.457	1.000	0.956	100	600.000	59.459	135.000	0.676	1.000	1.000	1.000
259	1.370	0.967	2.137	100	922.973	59.459	161.565	0.676	3.000	0.333	1.000
260	4.565	0.536	4.533	100	1014.189	63.514	63.435	2.117	2.827	0.354	0.667
261	0.457	1.000	0.956	100	1113.514	59.459	135.000	0.676	1.000	1.000	1.000
262	1.370	0.754	2.436	100	1129.730	60.811	33.690	1.209	2.702	0.370	0.667
263	0.457	1.000	0.956	100	113.514	60.135	135.000	0.676	1.000	1.000	1.000
264	1.826	0.740	2.786	100	62.838	60.811	165.964	0.676	4.000	0.250	1.000
265	2.283	1.000	2.436	100	225.000	62.162	33.690	1.351	1.553	0.644	0.909
266	0.913	1.000	1.511	100	421.622	60.811	116.565	0.676	2.000	0.500	1.000
267	18.718	0.323	12.909	100	370.946	61.486	132.879	2.867	6.434	0.155	0.621
268	0.457	1.000	0.956	100	390.541	61.486	135.000	0.676	1.000	1.000	1.000
269	0.913	1.000	1.511	100	427.027	61.486	153.435	0.676	2.000	0.500	1.000
270	1.826	0.698	2.867	100	1090.541	63.514	45.000	1.433	2.654	0.377	0.667
271	0.913	1.000	1.511	100	1106.757	61.486	153.435	0.676	2.000	0.500	1.000
272	1.370	0.967	2.137	100	1114.865	61.486	161.565	0.676	3.000	0.333	1.000
273	0.457	1.000	0.956	100	1140.541	61.486	135.000	0.676	1.000	1.000	1.000
274	0.457	1.000	0.956	100	212.162	62.162	135.000	0.676	1.000	1.000	1.000
275	2.739	0.686	3.378	100	461.486	62.162	126.870	1.433	2.810	0.356	0.750
276	0.457	1.000	0.956	100	993.919	62.162	135.000	0.676	1.000	1.000	1.000
277	0.913	1.000	1.511	100	1104.730	62.162	153.435	0.676	2.000	0.500	1.000
278	0.457	1.000	0.956	100	1137.838	62.162	135.000	0.676	1.000	1.000	1.000
279	2.283	0.764	3.022	100	217.568	64.189	26.565	1.351	2.610	0.383	0.769
280	0.457	1.000	0.956	100	277.703	62.838	135.000	0.676	1.000	1.000	1.000
281	0.457	1.000	0.956	100	304.054	62.838	135.000	0.676	1.000	1.000	1.000
282	0.913	1.000	1.511	100	309.459	62.838	153.435	0.676	2.000	0.500	1.000
283	0.457	1.000	0.956	100	1127.703	62.838	135.000	0.676	1.000	1.000	1.000
284	2.283	0.764	2.786	100	197.297	63.514	165.964	1.351	2.188	0.457	0.769
285	0.457	1.000	0.956	100	427.027	63.514	135.000	0.676	1.000	1.000	1.000
286	5.935	0.341	6.119	100	166.216	65.541	173.660	2.027	3.293	0.304	0.667
287	0.457	1.000	0.956	100	302.703	64.189	135.000	0.676	1.000	1.000	1.000
288	0.913	1.000	1.511	100	679.730	64.189	153.435	0.676	2.000	0.500	1.000
289	16.892	0.437	7.704	100	749.324	69.595	37.875	4.999	1.789	0.559	0.649
290	5.022	0.461	5.277	100	1010.135	67.568	39.806	2.644	2.342	0.427	0.595
291	0.913	1.000	1.511	100	1124.324	64.189	153.435	0.676	2.000	0.500	1.000
292	0.457	1.000	0.956	100	39.865	64.865	135.000	0.676	1.000	1.000	1.000
293	4.109	0.799	3.639	100	83.784	64.865	158.199	2.027	2.013	0.497	0.783
294	0.457	1.000	0.956	100	150.676	64.865	135.000	0.676	1.000	1.000	1.000
295	5.022	0.361	5.812	100	199.324	64.865	125.538	2.386	3.627	0.276	0.550
296	0.913	1.000	1.511	100	312.162	64.865	153.435	0.676	2.000	0.500	1.000
297	1.370	0.967	2.137	100	404.054	64.865	161.565	0.676	3.000	0.333	1.000
298	0.913	1.000	1.511	100	719.595	64.865	153.435	0.676	2.000	0.500	1.000
299	16.435	0.876	6.374	100	739.865	68.243	32.005	4.054	1.304	0.767	0.878
300	0.913	1.000	1.511	100	1072.297	64.865	153.435	0.676	2.000	0.500	1.000
301	0.457	1.000	0.956	100	464.865	65.541	135.000	0.676	1.000	1.000	1.000
302	0.457	1.000	0.956	100	675.000	65.541	135.000	0.676	1.000	1.000	1.000
303	5.022	0.547	4.533	100	677.703	66.216	153.435	2.515	2.004	0.499	0.647
304	1.370	0.967	2.137	100	1064.865	65.541	161.565	0.676	3.000	0.333	1.000
305	5.935	0.245	8.248	100	172.973	66.216	145.008	1.808	7.053	0.142	0.481
306	2.739	0.916	3.022	100	724.324	66.216	153.435	1.351	2.237	0.447	0.857
307	0.913	1.000	1.511	100	737.838	66.216	153.435	0.676	2.000	0.500	1.000
308	6.392	0.696	4.533	100	876.351	70.270	63.435	2.027	2.305	0.434	0.800
309	2.283	0.764	2.786	100	353.378	66.892	165.964	1.351	2.188	0.457	0.769
310	1.370	0.967	2.137	100	469.595	66.892	161.565	0.676	3.000	0.333	1.000
311	1.826	0.740	2.786	100	674.324	66.892	165.964	0.676	4.000	0.250	1.000
312	155.679	0.360	28.128	97.654	898.649	67.568	114.102	8.408	3.916	0.255	0.762
313	15.522	0.414	7.183	100	1091.892	66.892	138.814	5.063	1.868	0.535	0.618
314	0.457	1.000	0.956	100	1111.486	66.892	135.000	0.676	1.000	1.000	1.000
315	0.913	1.000	1.511	100	122.973	67.568	153.435	0.676	2.000	0.500	1.000
316	1.370	1.000	1.911	100	204.054	68.919	45.000	1.351	1.464	0.683	0.857
317	1.370	1.000	1.911	100	356.081	68.919	45.000	1.351	1.464	0.683	0.857
318	0.913	1.000	1.511	100	718.919	67.568	116.565	0.676	2.000	0.500	1.000
319	0.457	1.000	0.956	100	120.270	68.243	135.000	0.676	1.000	1.000	1.000
320	0.913	1.000	1.511	100	412.838	68.243	153.435	0.676	2.000	0.500	1.000
321	1.370	1.000	1.911	100	745.946	69.595	45.000	1.351	1.464	0.683	0.857
322	3.196	1.000	2.436	100	132.432	68.919	123.690	2.027	1.069	0.936	0.875
323	74.872	0.322	17.953	100	509.459	75.000	19.799	9.069	2.528	0.396	0.679
324	0.457	1.000	0.956	100	437.162	69.595	135.000	0.676	1.000	1.000	1.000
325	18.262	0.363	11.486	100	1111.486	75.000	28.072	3.423	4.566	0.219	0.625
326	0.457	1.000	0.956	100	64.865	70.270	135.000	0.676	1.000	1.000	1.000
327	0.913	1.000	1.511	100	118.243	70.270	153.435	0.676	2.000	0.500	1.000
328	1.826	0.857	2.137	100	715.541	70.270	108.435	1.351	1.468	0.681	0.800
329	0.457	1.000	0.956	100	750.676	70.270	135.000	0.676	1.000	1.000	1.000
330	0.457	1.000	0.956	100	755.405	71.622	135.000	0.676	1.000	1.000	1.000
331	0.913	1.000	1.511	100	875.676	71.622	116.565	0.676	2.000	0.500	1.000
332	0.913	0.785	1.911	100	104.730	74.324	45.000	0.956	2.646	0.378	0.667
333	14.609	0.604	6.757	100	500.676	77.027	36.870	3.827	1.713	0.584	0.753
334	0.457	1.000	0.956	100	764.189	72.973	135.000	0.676	1.000	1.000	1.000
335	0.457	1.000	0.956	100	575.676	73.649	135.000	0.676	1.000	1.000	1.000
336	0.457	1.000	0.956	100	762.162	73.649	135.000	0.676	1.000	1.000	1.000
337	0.913	1.000	1.511	100	102.703	74.324	153.435	0.676	2.000	0.500	1.000
338	0.457	1.000	0.956	100	1095.946	74.324	135.000	0.676	1.000	1.000	1.000
339	0.913	1.000	1.511	100	95.270	75.000	116.565	0.676	2.000	0.500	1.000
340	2.283	0.513	3.639	100	683.108	76.351	21.801	1.284	4.051	0.247	0.667
341	10.044	0.397	5.773	100	184.459	81.081	69.444	3.822	1.656	0.604	0.620
342	4.109	0.698	4.326	100	229.054	75.676	141.340	1.876	3.199	0.313	0.720
343	58.893	0.601	13.598	100	258.784	87.838	63.435	7.654	1.859	0.538	0.777
344	0.457	1.000	0.956	100	286.486	75.676	135.000	0.676	1.000	1.000	1.000
345	0.913	1.000	1.511	100	681.081	75.676	153.435	0.676	2.000	0.500	1.000
346	0.457	1.000	0.956	100	1083.108	75.676	135.000	0.676	1.000	1.000	1.000
347	0.913	1.000	1.511	100	1095.946	75.676	153.435	0.676	2.000	0.500	1.000
348	0.457	1.000	0.956	100	291.216	76.351	135.000	0.676	1.000	1.000	1.000
349	0.457	1.000	0.956	100	713.514	76.351	135.000	0.676	1.000	1.000	1.000
350	0.457	1.000	0.956	100	44.595	77.027	135.000	0.676	1.000	1.000	1.000
351	12.327	0.510	8.136	100	383.784	77.027	131.634	2.867	3.214	0.311	0.711
352	0.457	1.000	0.956	100	400.000	77.027	135.000	0.676	1.000	1.000	1.000
353	0.457	1.000	0.956	100	1032.432	77.027	135.000	0.676	1.000	1.000	1.000
354	0.457	1.000	0.956	100	92.568	77.703	135.000	0.676	1.000	1.000	1.000
355	0.457	1.000	0.956	100	510.135	77.703	135.000	0.676	1.000	1.000	1.000
356	2.739	1.000	2.436	100	43.243	78.378	146.310	1.351	1.500	0.667	1.000
357	0.457	1.000	0.956	100	578.378	78.378	135.000	0.676	1.000	1.000	1.000
358	0.457	1.000	0.956	100	585.135	78.378	135.000	0.676	1.000	1.000	1.000
359	0.913	1.000	1.511	100	181.757	79.054	153.435	0.676	2.000	0.500	1.000
360	19.175	0.618	8.136	97.619	490.541	85.135	48.366	4.226	2.221	0.450	0.757
361	2.283	1.000	2.436	100	1095.946	80.405	33.690	1.351	1.553	0.644	0.909
362	0.457	1.000	0.956	100	194.595	79.730	135.000	0.676	1.000	1.000	1.000
363	0.457	1.000	0.956	100	879.054	80.405	135.000	0.676	1.000	1.000	1.000
364	0.913	1.000	1.511	100	162.162	81.081	153.435	0.676	2.000	0.500	1.000
365	0.457	1.000	0.956	100	178.378	81.081	135.000	0.676	1.000	1.000	1.000
366	2.283	0.674	3.022	100	210.811	83.784	63.435	1.351	2.749	0.364	0.769
367	1.370	1.000	1.911	100	946.622	82.432	45.000	1.351	1.464	0.683	0.857
368	5.022	0.589	3.940	100	1096.622	84.459	59.036	2.867	1.598	0.626	0.611
369	0.457	1.000	0.956	100	135.135	81.757	135.000	0.676	1.000	1.000	1.000
370	10.044	0.465	7.704	100	669.595	81.757	127.875	2.689	3.435	0.291	0.647
371	0.457	1.000	0.956	100	762.162	81.757	135.000	0.676	1.000	1.000	1.000
372	1.826	0.857	2.436	100	26.351	84.459	56.310	1.351	2.000	0.500	0.800
373	1.370	0.967	2.137	100	181.757	82.432	161.565	0.676	3.000	0.333	1.000
374	29.218	0.470	10.576	100	497.973	92.568	63.435	5.772	2.161	0.463	0.663
375	0.913	1.000	1.511	100	43.243	83.108	116.565	0.676	2.000	0.500	1.000
376	3.652	1.000	3.378	100	393.919	83.108	143.130	1.911	1.939	0.516	0.842
377	0.457	1.000	0.956	100	1032.432	83.108	135.000	0.676	1.000	1.000	1.000
378	0.457	1.000	0.956	100	1044.595	83.108	135.000	0.676	1.000	1.000	1.000
379	2.739	1.000	2.867	100	162.162	83.784	135.000	1.814	1.809	0.553	0.800
380	0.913	1.000	1.511	100	585.135	84.459	153.435	0.676	2.000	0.500	1.000
381	1.826	1.000	2.436	100	1098.649	85.811	33.690	1.351	2.000	0.500	0.800
382	0.913	1.000	1.511	100	150.000	85.135	153.435	0.676	2.000	0.500	1.000
383	0.457	1.000	0.956	100	183.784	85.135	135.000	0.676	1.000	1.000	1.000
384	0.457	1.000	0.956	100	24.324	85.811	135.000	0.676	1.000	1.000	1.000
385	0.913	1.000	1.511	100	396.622	85.811	153.435	0.676	2.000	0.500	1.000
386	0.457	1.000	0.956	100	585.811	85.811	135.000	0.676	1.000	1.000	1.000
387	3.196	1.000	2.867	100	193.919	86.486	135.000	2.027	1.380	0.725	0.875
388	0.913	1.000	1.511	100	394.595	86.486	153.435	0.676	2.000	0.500	1.000
389	0.457	1.000	0.956	100	808.108	86.486	135.000	0.676	1.000	1.000	1.000
390	1.370	0.967	2.137	100	1143.243	86.486	161.565	0.676	3.000	0.333	1.000
391	0.457	1.000	0.956	100	200.000	87.162	135.000	0.676	1.000	1.000	1.000
392	4.565	0.736	3.639	100	585.135	87.162	111.801	2.027	1.740	0.575	0.800
393	0.457	1.000	0.956	100	805.405	87.162	135.000	0.676	1.000	1.000	1.000
394	0.913	1.000	1.511	100	489.189	87.838	116.565	0.676	2.000	0.500	1.000
395	3.196	0.800	3.378	100	1095.946	90.541	53.130	1.710	2.408	0.415	0.737
396	3.196	0.800	3.022	100	89.189	91.216	63.435	1.814	1.895	0.528	0.737
397	20.088	0.322	10.489	93.182	398.649	88.514	165.069	4.061	3.415	0.293	0.667
398	0.913	1.000	1.511	100	739.865	88.514	153.435	0.676	2.000	0.500	1.000
399	0.913	1.000	1.511	100	835.135	88.514	116.565	0.676	2.000	0.500	1.000
400	2.283	1.000	2.436	100	19.595	90.541	33.690	1.351	1.553	0.644	0.909
401	1.826	1.000	2.436	100	43.243	89.865	146.310	1.351	2.031	0.492	0.800
402	0.457	1.000	0.956	100	194.595	89.865	135.000	0.676	1.000	1.000	1.000
403	2.739	0.916	3.022	100	252.703	91.216	26.565	1.351	2.237	0.447	0.857
404	36.980	0.470	11.506	98.765	410.135	91.892	139.764	6.876	1.878	0.533	0.726
405	0.913	1.000	1.511	100	489.189	90.541	116.565	0.676	2.000	0.500	1.000
406	0.457	1.000	0.956	100	594.595	90.541	135.000	0.676	1.000	1.000	1.000
407	5.022	0.589	4.872	100	15.541	93.919	33.690	1.816	3.579	0.279	0.688
408	0.457	1.000	0.956	100	587.162	91.216	135.000	0.676	1.000	1.000	1.000
409	118.700	0.355	26.619	100	977.027	102.703	23.962	9.067	3.282	0.305	0.745
410	0.457	1.000	0.956	100	43.243	91.892	135.000	0.676	1.000	1.000	1.000
411	1.370	0.754	2.436	100	74.324	93.243	33.690	1.209	2.702	0.370	0.667
412	7.761	1.000	4.326	100	490.541	91.892	128.660	2.703	1.389	0.720	0.944
413	0.457	1.000	0.956	100	585.811	91.892	135.000	0.676	1.000	1.000	1.000
414	2.739	0.769	2.867	100	587.162	93.919	45.000	2.027	1.295	0.772	0.750
415	0.457	1.000	0.956	100	597.297	91.892	135.000	0.676	1.000	1.000	1.000
416	0.457	1.000	0.956	100	602.027	91.892	135.000	0.676	1.000	1.000	1.000
417	0.457	1.000	0.956	100	281.081	92.568	135.000	0.676	1.000	1.000	1.000
418	0.457	1.000	0.956	100	620.946	92.568	135.000	0.676	1.000	1.000	1.000
419	46.567	0.497	12.695	96.078	908.108	104.054	64.799	7.069	1.900	0.526	0.731
420	2.283	0.873	2.867	100	150.000	93.243	135.000	1.814	1.882	0.531	0.714
421	0.913	1.000	1.511	100	205.405	93.243	153.435	0.676	2.000	0.500	1.000
422	0.457	1.000	0.956	100	348.649	93.243	135.000	0.676	1.000	1.000	1.000
423	5.022	0.809	3.940	100	525.676	96.622	59.036	2.027	2.215	0.451	0.846
424	0.457	1.000	0.956	100	75.676	94.595	135.000	0.676	1.000	1.000	1.000
425	1.370	1.000	1.911	100	350.000	94.595	135.000	1.351	1.464	0.683	0.857
426	1.370	0.967	2.137	100	587.162	94.595	161.565	0.676	3.000	0.333	1.000
427	7.761	0.460	6.655	100	455.405	95.270	156.038	2.386	3.902	0.256	0.667
428	0.913	1.000	1.511	100	724.324	95.270	153.435	0.676	2.000	0.500	1.000
429	0.457	1.000	0.956	100	802.703	95.270	135.000	0.676	1.000	1.000	1.000
430	3.196	1.000	2.867	100	89.189	97.973	45.000	2.027	1.380	0.725	0.875
431	1.370	0.967	2.137	100	587.162	95.946	161.565	0.676	3.000	0.333	1.000
432	0.457	1.000	0.956	100	620.946	95.946	135.000	0.676	1.000	1.000	1.000
433	431.428	0.393	35.913	99.683	915.541	108.108	168.056	25.362	1.370	0.730	0.714
434	0.457	1.000	0.956	100	151.351	96.622	135.000	0.676	1.000	1.000	1.000
435	0.457	1.000	0.956	100	281.081	96.622	135.000	0.676	1.000	1.000	1.000
436	2.739	0.503	4.110	100	493.243	97.297	170.538	0.676	6.000	0.167	1.000
437	0.457	1.000	0.956	100	622.973	97.297	135.000	0.676	1.000	1.000	1.000
438	0.457	1.000	0.956	100	151.351	97.973	135.000	0.676	1.000	1.000	1.000
439	74.872	0.370	20.594	100	28.378	112.838	41.009	6.479	4.298	0.233	0.680
440	33.784	0.267	12.459	100	252.703	98.649	139.399	7.765	1.960	0.510	0.527
441	0.457	1.000	0.956	100	257.432	98.649	135.000	0.676	1.000	1.000	1.000
442	5.935	0.380	6.229	100	794.595	100.676	12.529	2.027	4.021	0.249	0.650
443	0.913	1.000	1.511	100	1087.838	98.649	116.565	0.676	2.000	0.500	1.000
444	0.457	1.000	0.956	100	139.865	99.324	135.000	0.676	1.000	1.000	1.000
445	68.024	0.148	19.699	98.658	246.622	118.919	84.094	9.459	2.028	0.493	0.522
446	225.073	0.419	23.965	100	485.135	108.108	158.499	18.068	1.380	0.725	0.757
447	0.457	1.000	0.956	100	868.243	99.324	135.000	0.676	1.000	1.000	1.000
448	0.913	1.000	1.511	100	78.378	100.000	116.565	0.676	2.000	0.500	1.000
449	4.565	0.337	5.572	100	585.135	100.000	104.036	2.027	4.060	0.246	0.571
450	0.457	1.000	0.956	100	589.189	100.000	135.000	0.676	1.000	1.000	1.000
451	0.457	1.000	0.956	100	627.027	100.000	135.000	0.676	1.000	1.000	1.000
452	0.913	1.000	1.511	100	724.324	100.000	153.435	0.676	2.000	0.500	1.000
453	2.283	0.674	3.022	100	1135.135	102.703	63.435	1.351	2.749	0.364	0.769
454	0.457	1.000	0.956	100	345.270	100.676	135.000	0.676	1.000	1.000	1.000
455	0.457	1.000	0.956	100	139.865	101.351	135.000	0.676	1.000	1.000	1.000
456	1.370	0.967	2.137	100	341.892	101.351	161.565	0.676	3.000	0.333	1.000
457	0.913	1.000	1.511	100	745.946	101.351	153.435	0.676	2.000	0.500	1.000
458	0.457	1.000	0.956	100	138.514	102.027	135.000	0.676	1.000	1.000	1.000
459	26.936	0.159	15.408	100	510.811	108.108	15.255	4.810	3.546	0.282	0.474
460	6.848	0.898	4.326	100	129.730	102.703	128.660	2.703	1.611	0.621	0.882
461	3.196	0.419	4.533	100	285.811	102.703	153.435	1.886	3.053	0.327	0.583
462	0.457	1.000	0.956	100	562.162	102.703	135.000	0.676	1.000	1.000	1.000
463	4.565	0.292	5.733	100	888.514	102.703	135.000	2.389	2.718	0.368	0.465
464	0.457	1.000	0.956	100	906.757	102.703	135.000	0.676	1.000	1.000	1.000
465	3.652	0.359	4.919	100	145.270	104.730	15.945	1.351	4.109	0.243	0.593
466	4.109	0.638	3.940	100	621.622	107.432	59.036	1.911	2.472	0.404	0.720
467	0.913	0.785	1.911	100	777.703	104.054	135.000	0.956	2.646	0.378	0.667
468	5.022	0.474	5.447	100	1128.378	104.054	172.875	1.351	4.176	0.239	0.815
469	4.109	0.585	3.940	100	691.216	104.730	149.036	2.419	1.520	0.658	0.667
470	0.913	1.000	1.511	100	750.000	104.730	153.435	0.676	2.000	0.500	1.000
471	134.222	0.453	17.838	97.619	970.946	115.541	24.624	12.029	1.322	0.757	0.776
472	0.457	1.000	0.956	100	151.351	105.405	135.000	0.676	1.000	1.000	1.000
473	5.935	0.380	6.655	100	447.973	108.108	23.962	1.927	5.195	0.192	0.619
474	2.283	0.873	2.867	100	732.432	107.432	45.000	1.433	2.308	0.433	0.769
475	3.652	0.740	3.639	100	781.757	106.757	21.801	1.351	2.564	0.390	0.889
476	47.936	0.401	14.060	100	229.730	108.108	144.782	7.977	1.807	0.553	0.724
477	0.913	1.000	1.511	100	306.757	106.081	153.435	0.676	2.000	0.500	1.000
478	4.565	0.536	4.326	100	525.000	108.784	38.660	2.299	2.490	0.402	0.606
479	5.935	0.403	5.812	100	583.108	110.811	54.462	2.265	3.451	0.290	0.619
480	0.457	1.000	0.956	100	945.946	106.081	135.000	0.676	1.000	1.000	1.000
481	0.457	1.000	0.956	100	140.541	106.757	135.000	0.676	1.000	1.000	1.000
482	0.913	1.000	1.511	100	86.486	107.432	153.435	0.676	2.000	0.500	1.000
483	4.109	0.662	3.940	100	452.027	107.432	149.036	2.027	2.006	0.499	0.750
484	28.762	0.494	10.576	100	458.784	107.432	153.435	5.033	2.623	0.381	0.692
485	0.457	1.000	0.956	100	696.622	107.432	135.000	0.676	1.000	1.000	1.000
486	0.913	0.785	1.911	100	750.676	107.432	135.000	0.956	2.646	0.378	0.667
487	0.913	0.785	1.911	100	891.216	107.432	135.000	0.956	2.646	0.378	0.667
488	2.283	1.000	2.436	100	77.703	108.108	146.310	1.351	1.553	0.644	0.909
489	0.913	1.000	1.511	100	147.297	108.108	153.435	0.676	2.000	0.500	1.000
490	0.457	1.000	0.956	100	150.676	108.784	135.000	0.676	1.000	1.000	1.000
491	0.457	1.000	0.956	100	474.324	108.784	135.000	0.676	1.000	1.000	1.000
492	0.457	1.000	0.956	100	893.243	108.784	135.000	0.676	1.000	1.000	1.000
493	2.283	0.873	2.867	100	512.838	109.459	135.000	1.433	2.308	0.433	0.769
494	0.457	1.000	0.956	100	517.568	109.459	135.000	0.676	1.000	1.000	1.000
495	4.109	0.799	3.378	100	757.432	109.459	126.870	2.254	1.679	0.596	0.750
496	0.913	1.000	1.511	100	145.270	110.135	153.435	0.676	2.000	0.500	1.000
497	12.327	0.730	5.277	100	257.432	110.135	129.806	3.930	1.386	0.721	0.818
498	0.913	1.000	1.511	100	281.081	110.135	153.435	0.676	2.000	0.500	1.000
499	0.457	1.000	0.956	100	526.351	110.135	135.000	0.676	1.000	1.000	1.000
500	2.283	1.000	2.436	100	754.054	110.135	146.310	1.351	1.553	0.644	0.909
501	1.370	0.643	2.436	100	475.000	110.811	123.690	1.209	2.702	0.370	0.667
502	0.457	1.000	0.956	100	751.351	110.811	135.000	0.676	1.000	1.000	1.000
503	2.739	0.916	3.022	100	584.459	111.486	153.435	1.351	2.082	0.480	0.857
504	0.457	1.000	0.956	100	605.405	111.486	135.000	0.676	1.000	1.000	1.000
505	88.112	0.444	19.734	99.482	704.730	112.162	128.047	8.817	2.783	0.359	0.738
506	68.024	0.443	12.997	100	816.216	119.595	8.973	9.511	1.366	0.732	0.704
507	1.370	0.967	2.137	100	845.946	112.162	161.565	0.676	3.000	0.333	1.000
508	0.457	1.000	0.956	100	470.270	112.838	135.000	0.676	1.000	1.000	1.000
509	0.913	1.000	1.511	100	620.270	112.838	153.435	0.676	2.000	0.500	1.000
510	0.457	1.000	0.956	100	622.973	112.838	135.000	0.676	1.000	1.000	1.000
511	4.565	0.599	4.273	100	840.541	114.189	18.435	2.027	2.513	0.398	0.714
512	0.457	1.000	0.956	100	951.351	112.838	135.000	0.676	1.000	1.000	1.000
513	0.457	1.000	0.956	100	251.351	113.514	135.000	0.676	1.000	1.000	1.000
514	1.826	1.000	1.911	100	588.514	113.514	135.000	1.351	1.000	1.000	1.000
515	0.457	1.000	0.956	100	318.919	114.189	135.000	0.676	1.000	1.000	1.000
516	1.826	1.000	2.436	100	614.189	115.541	33.690	1.351	2.031	0.492	0.800
517	0.457	1.000	0.956	100	870.270	114.189	135.000	0.676	1.000	1.000	1.000
518	68.024	0.316	16.328	100	15.541	118.919	155.556	11.016	1.684	0.594	0.580
519	0.457	1.000	0.956	100	252.027	114.865	135.000	0.676	1.000	1.000	1.000
520	2.283	0.674	3.022	100	316.216	117.568	63.435	1.351	2.610	0.383	0.769
521	147.462	0.566	16.892	100	54.054	131.081	53.130	14.189	1.245	0.803	0.840
522	0.913	1.000	1.511	100	167.568	116.216	116.565	0.676	2.000	0.500	1.000
523	2.283	0.873	2.436	100	588.514	116.216	123.690	1.351	1.653	0.605	0.833
524	32.871	0.653	9.745	100	737.162	124.324	56.310	5.651	1.982	0.505	0.837
525	0.913	1.000	1.511	100	951.351	116.216	116.565	0.676	2.000	0.500	1.000
526	0.913	1.000	1.511	100	308.108	116.892	116.565	0.676	2.000	0.500	1.000
527	2.283	0.641	3.378	100	218.919	119.595	36.870	1.433	3.145	0.318	0.667
528	0.913	1.000	1.511	100	313.514	117.568	116.565	0.676	2.000	0.500	1.000
529	17.348	0.368	8.248	100	519.595	117.568	145.008	3.944	2.653	0.377	0.697
530	27.849	0.639	9.555	96.721	261.486	118.919	135.000	5.545	1.871	0.534	0.782
531	0.913	1.000	1.511	100	829.730	118.243	153.435	0.676	2.000	0.500	1.000
532	1.370	0.754	2.436	100	144.595	120.270	33.690	1.209	2.702	0.370	0.667
533	0.913	1.000	1.511	100	305.405	118.919	153.435	0.676	2.000	0.500	1.000
534	0.457	1.000	0.956	100	588.514	118.919	135.000	0.676	1.000	1.000	1.000
535	0.457	1.000	0.956	100	627.027	118.919	135.000	0.676	1.000	1.000	1.000
536	31.501	0.798	8.810	100	963.514	126.351	57.529	5.969	1.527	0.655	0.868
537	1.826	0.513	3.378	100	154.730	122.297	36.870	1.316	3.850	0.260	0.571
538	2.739	0.809	3.022	100	179.730	122.973	63.435	1.351	2.237	0.447	0.857
539	0.913	0.785	1.911	100	218.243	121.622	45.000	0.956	2.646	0.378	0.667
540	0.457	1.000	0.956	100	304.054	120.270	135.000	0.676	1.000	1.000	1.000
541	2.739	0.686	3.378	100	585.811	123.649	53.130	1.513	2.778	0.360	0.706
542	39.262	0.145	15.423	96.512	806.757	134.459	61.189	8.923	2.362	0.423	0.435
543	25.110	0.293	11.506	98.182	842.568	128.378	40.236	6.689	1.810	0.552	0.539
544	96.786	0.283	25.245	99.528	159.459	121.622	105.524	8.523	4.446	0.225	0.614
545	0.457	1.000	0.956	100	345.946	121.622	135.000	0.676	1.000	1.000	1.000
546	0.913	1.000	1.511	100	837.162	121.622	153.435	0.676	2.000	0.500	1.000
547	0.457	1.000	0.956	100	427.027	122.297	135.000	0.676	1.000	1.000	1.000
548	0.457	1.000	0.956	100	854.054	122.297	135.000	0.676	1.000	1.000	1.000
549	28.762	0.144	10.999	100	875.676	133.108	79.380	8.122	1.477	0.677	0.405
550	6.848	0.193	6.229	100	1042.568	127.027	49.399	3.801	1.824	0.548	0.476
551	2.739	1.000	2.436	100	1064.865	122.297	146.310	1.351	1.500	0.667	1.000
552	2.283	0.388	3.378	100	349.324	122.973	143.130	2.027	1.769	0.565	0.526
553	0.457	1.000	0.956	100	437.162	122.973	135.000	0.676	1.000	1.000	1.000
554	0.457	1.000	0.956	100	600.000	122.973	135.000	0.676	1.000	1.000	1.000
555	0.457	1.000	0.956	100	604.730	122.973	135.000	0.676	1.000	1.000	1.000
556	0.457	1.000	0.956	100	734.459	122.973	135.000	0.676	1.000	1.000	1.000
557	2.739	0.916	2.867	100	881.081	125.676	45.000	1.911	1.593	0.628	0.857
558	0.457	1.000	0.956	100	1048.649	123.649	135.000	0.676	1.000	1.000	1.000
559	18.718	0.256	13.309	100	1081.757	129.054	23.962	3.906	4.756	0.210	0.516
560	7.761	0.609	5.773	100	1093.919	126.351	20.556	2.703	2.381	0.420	0.756
561	0.913	1.000	1.511	100	118.919	124.324	153.435	0.676	2.000	0.500	1.000
562	1.370	0.754	2.436	100	340.541	125.676	33.690	1.209	2.702	0.370	0.667
563	4.565	0.599	4.273	100	583.784	128.378	71.565	2.027	2.513	0.398	0.714
564	0.913	1.000	1.511	100	825.000	124.324	153.435	0.676	2.000	0.500	1.000
565	2.283	0.491	2.867	100	999.324	124.324	135.000	2.027	1.368	0.731	0.556
566	0.457	1.000	0.956	100	1118.919	124.324	135.000	0.676	1.000	1.000	1.000
567	0.457	1.000	0.956	100	1136.486	124.324	135.000	0.676	1.000	1.000	1.000
568	0.913	1.000	1.511	100	312.838	125.000	116.565	0.676	2.000	0.500	1.000
569	6.392	0.696	4.533	100	466.892	129.054	63.435	2.027	2.313	0.432	0.824
570	0.457	1.000	0.956	100	906.081	125.000	135.000	0.676	1.000	1.000	1.000
571	1.826	0.857	2.137	100	1064.865	125.000	108.435	1.351	1.468	0.681	0.800
572	0.457	1.000	0.956	100	329.730	125.676	135.000	0.676	1.000	1.000	1.000
573	0.913	1.000	1.511	100	825.676	125.676	116.565	0.676	2.000	0.500	1.000
574	0.457	1.000	0.956	100	220.946	126.351	135.000	0.676	1.000	1.000	1.000
575	0.457	1.000	0.956	100	224.324	126.351	135.000	0.676	1.000	1.000	1.000
576	2.283	0.764	3.022	100	433.784	127.703	26.565	1.351	2.610	0.383	0.769
577	0.457	1.000	0.956	100	1139.189	126.351	135.000	0.676	1.000	1.000	1.000
578	2.283	1.000	2.436	100	137.162	127.027	146.310	1.351	1.553	0.644	0.909
579	6.848	0.357	4.533	100	506.081	128.378	153.435	3.378	1.551	0.645	0.600
580	2.283	1.000	2.436	100	580.405	127.027	146.310	1.351	1.553	0.644	0.909
581	78.068	0.108	22.461	100	732.432	148.649	74.291	13.106	2.068	0.483	0.401
582	6.392	0.489	5.447	100	864.189	131.757	60.255	2.720	2.316	0.432	0.651
583	1.826	0.740	2.786	100	868.919	127.027	165.964	0.676	4.000	0.250	1.000
584	5.022	0.420	4.919	100	905.405	127.027	105.945	2.027	2.908	0.344	0.629
585	0.457	1.000	0.956	100	1124.324	127.027	135.000	0.676	1.000	1.000	1.000
586	15.066	0.467	9.387	100	202.703	135.811	59.744	2.951	3.774	0.265	0.750
587	3.196	0.687	3.822	100	717.568	127.703	135.000	1.876	2.921	0.342	0.636
588	1.370	0.967	2.137	100	1138.514	127.703	161.565	0.676	3.000	0.333	1.000
589	0.457	1.000	0.956	100	227.027	128.378	135.000	0.676	1.000	1.000	1.000
590	0.457	1.000	0.956	100	340.541	128.378	135.000	0.676	1.000	1.000	1.000
591	0.457	1.000	0.956	100	470.270	128.378	135.000	0.676	1.000	1.000	1.000
592	11.870	0.276	9.015	100	571.622	128.378	167.005	2.703	3.619	0.276	0.571
593	0.457	1.000	0.956	100	870.270	128.378	135.000	0.676	1.000	1.000	1.000
594	6.392	0.302	7.309	100	927.027	128.378	146.310	2.364	4.347	0.230	0.500
595	0.457	1.000	0.956	100	1129.730	128.378	135.000	0.676	1.000	1.000	1.000
596	0.913	1.000	1.511	100	311.486	129.054	153.435	0.676	2.000	0.500	1.000
597	0.457	1.000	0.956	100	318.919	129.054	135.000	0.676	1.000	1.000	1.000
598	6.392	0.750	4.872	100	545.946	129.054	146.310	2.419	2.540	0.394	0.778
599	12.327	0.203	7.704	100	556.757	131.757	15.255	3.849	1.817	0.550	0.562
600	0.913	1.000	1.511	100	868.243	129.054	153.435	0.676	2.000	0.500	1.000
601	0.913	0.785	1.911	100	1137.838	130.405	45.000	0.956	2.646	0.378	0.667
602	2.739	0.916	2.436	100	85.811	129.730	123.690	2.027	1.124	0.890	0.800
603	10.957	0.314	7.704	100	88.514	133.108	15.255	3.378	2.881	0.347	0.522
604	0.457	1.000	0.956	100	137.162	129.730	135.000	0.676	1.000	1.000	1.000
605	0.913	1.000	1.511	100	329.730	129.730	116.565	0.676	2.000	0.500	1.000
606	0.457	1.000	0.956	100	335.135	129.730	135.000	0.676	1.000	1.000	1.000
607	0.913	1.000	1.511	100	354.730	129.730	153.435	0.676	2.000	0.500	1.000
608	0.457	1.000	0.956	100	467.568	129.730	135.000	0.676	1.000	1.000	1.000
609	0.913	1.000	1.511	100	569.595	129.730	153.435	0.676	2.000	0.500	1.000
610	60.720	0.634	11.184	100	785.135	129.730	115.017	9.621	1.267	0.789	0.771
611	7.761	0.445	6.790	100	816.216	129.730	174.289	2.027	3.646	0.274	0.791
612	1.370	1.000	1.911	100	878.378	131.081	45.000	1.351	1.464	0.683	0.857
613	0.457	1.000	0.956	100	1129.730	129.730	135.000	0.676	1.000	1.000	1.000
614	2.283	0.674	2.786	100	297.297	130.405	104.036	1.351	2.188	0.457	0.769
615	0.457	1.000	0.956	100	313.514	130.405	135.000	0.676	1.000	1.000	1.000
616	0.457	1.000	0.956	100	318.919	130.405	135.000	0.676	1.000	1.000	1.000
617	0.457	1.000	0.956	100	843.243	130.405	135.000	0.676	1.000	1.000	1.000
618	1.370	1.000	1.911	100	870.270	131.757	45.000	1.351	1.464	0.683	0.857
619	0.457	1.000	0.956	100	177.703	131.081	135.000	0.676	1.000	1.000	1.000
620	1.826	0.740	2.786	100	314.865	131.081	165.964	0.676	4.000	0.250	1.000
621	10.044	0.698	5.773	100	507.432	131.757	159.444	2.703	2.054	0.487	0.830
622	0.913	1.000	1.511	100	552.703	131.081	153.435	0.676	2.000	0.500	1.000
623	0.457	1.000	0.956	100	579.054	131.081	135.000	0.676	1.000	1.000	1.000
624	5.022	0.715	3.940	100	934.459	134.459	59.036	2.703	1.613	0.620	0.733
625	0.913	1.000	1.511	100	82.432	131.757	153.435	0.676	2.000	0.500	1.000
626	0.457	1.000	0.956	100	335.135	131.757	135.000	0.676	1.000	1.000	1.000
627	2.283	1.000	2.436	100	370.270	131.757	123.690	1.351	1.553	0.644	0.909
628	4.565	0.317	6.229	100	857.432	133.108	12.529	1.725	4.894	0.204	0.571
629	0.913	1.000	1.511	100	34.459	132.432	153.435	0.676	2.000	0.500	1.000
630	0.457	1.000	0.956	100	269.595	133.108	135.000	0.676	1.000	1.000	1.000
631	0.913	1.000	1.511	100	319.595	133.108	153.435	0.676	2.000	0.500	1.000
632	1.826	1.000	1.911	100	350.676	133.108	135.000	1.351	1.000	1.000	1.000
633	5.935	0.697	4.872	100	469.595	133.108	123.690	2.116	2.949	0.339	0.765
634	8.218	0.305	7.704	100	546.622	139.189	52.125	2.751	4.147	0.241	0.514
635	0.913	1.000	1.511	100	556.757	133.108	153.435	0.676	2.000	0.500	1.000
636	0.913	1.000	1.511	100	562.162	133.108	116.565	0.676	2.000	0.500	1.000
637	0.457	1.000	0.956	100	588.514	133.108	135.000	0.676	1.000	1.000	1.000
638	1.370	0.967	2.137	100	765.541	133.108	161.565	0.676	3.000	0.333	1.000
639	0.913	1.000	1.511	100	906.081	133.108	153.435	0.676	2.000	0.500	1.000
640	0.457	1.000	0.956	100	914.865	133.108	135.000	0.676	1.000	1.000	1.000
641	15.066	0.368	8.358	100	958.784	134.459	165.964	3.378	2.433	0.411	0.702
642	1.370	0.967	2.137	100	1046.622	133.108	161.565	0.676	3.000	0.333	1.000
643	0.913	1.000	1.511	100	225.676	133.784	153.435	0.676	2.000	0.500	1.000
644	2.283	0.674	2.867	100	917.568	133.784	135.000	1.911	1.727	0.579	0.714
645	0.457	1.000	0.956	100	1139.865	133.784	135.000	0.676	1.000	1.000	1.000
646	7.305	0.628	5.572	100	193.243	135.811	14.036	2.027	2.453	0.408	0.800
647	0.913	1.000	1.511	100	329.730	134.459	116.565	0.676	2.000	0.500	1.000
648	0.457	1.000	0.956	100	587.838	134.459	135.000	0.676	1.000	1.000	1.000
649	29.218	0.357	10.045	96.875	804.054	134.459	137.726	6.090	1.774	0.564	0.677
650	1.370	0.754	2.436	100	814.189	135.811	33.690	1.209	2.702	0.370	0.667
651	12.327	0.283	9.015	100	875.000	143.243	77.005	3.378	4.060	0.246	0.491
652	10.500	0.532	6.374	100	348.649	140.541	57.995	3.715	1.921	0.521	0.667
653	0.457	1.000	0.956	100	391.892	135.135	135.000	0.676	1.000	1.000	1.000
654	0.457	1.000	0.956	100	632.432	135.135	135.000	0.676	1.000	1.000	1.000
655	0.913	1.000	1.511	100	933.108	135.135	153.435	0.676	2.000	0.500	1.000
656	0.457	1.000	0.956	100	1137.838	135.135	135.000	0.676	1.000	1.000	1.000
657	31.501	0.646	8.784	100	45.946	135.811	112.620	6.081	1.355	0.738	0.847
658	0.913	1.000	1.511	100	190.541	135.811	153.435	0.676	2.000	0.500	1.000
659	0.457	1.000	0.956	100	870.270	135.811	135.000	0.676	1.000	1.000	1.000
660	0.913	1.000	1.511	100	1131.757	135.811	153.435	0.676	2.000	0.500	1.000
661	0.913	1.000	1.511	100	104.054	136.486	153.435	0.676	2.000	0.500	1.000
662	0.913	1.000	1.511	100	139.189	136.486	153.435	0.676	2.000	0.500	1.000
663	0.457	1.000	0.956	100	200.000	136.486	135.000	0.676	1.000	1.000	1.000
664	0.457	1.000	0.956	100	232.432	136.486	135.000	0.676	1.000	1.000	1.000
665	0.457	1.000	0.956	100	256.757	136.486	135.000	0.676	1.000	1.000	1.000
666	0.913	1.000	1.511	100	476.351	136.486	153.435	0.676	2.000	0.500	1.000
667	1.370	1.000	1.911	100	810.135	136.486	135.000	1.351	1.464	0.683	0.857
668	0.457	1.000	0.956	100	872.297	136.486	135.000	0.676	1.000	1.000	1.000
669	0.913	1.000	1.511	100	907.432	136.486	153.435	0.676	2.000	0.500	1.000
670	2.283	1.000	2.436	100	917.568	136.486	146.310	1.351	1.553	0.644	0.909
671	2.739	0.916	3.022	100	108.108	137.162	153.435	1.351	2.237	0.447	0.857
672	0.457	1.000	0.956	100	473.649	137.162	135.000	0.676	1.000	1.000	1.000
673	0.457	1.000	0.956	100	550.676	137.162	135.000	0.676	1.000	1.000	1.000
674	2.739	0.916	2.786	100	954.054	137.162	165.964	1.351	1.809	0.553	0.857
675	1.370	1.000	1.911	100	1110.135	137.162	135.000	1.351	1.464	0.683	0.857
676	3.196	0.434	4.778	100	59.459	137.838	171.870	0.676	7.000	0.143	1.000
677	45.654	0.168	14.880	100	118.919	139.189	129.472	7.416	2.301	0.435	0.529
678	2.283	1.000	2.436	100	145.946	139.189	33.690	1.351	1.553	0.644	0.909
679	3.196	1.000	3.022	100	151.351	139.189	26.565	1.351	1.936	0.517	0.933
680	0.457	1.000	0.956	100	258.108	137.838	135.000	0.676	1.000	1.000	1.000
681	1.370	1.000	1.911	100	475.000	137.838	135.000	1.351	1.464	0.683	0.857
682	2.283	0.873	2.867	100	328.378	140.541	45.000	1.433	2.308	0.433	0.769
683	1.370	1.000	1.911	100	868.243	138.514	135.000	1.351	1.464	0.683	0.857
684	0.913	1.000	1.511	100	908.108	138.514	116.565	0.676	2.000	0.500	1.000
685	0.457	1.000	0.956	100	870.270	139.189	135.000	0.676	1.000	1.000	1.000
686	2.739	0.686	3.378	100	1072.973	141.216	36.870	1.814	2.464	0.406	0.667
687	0.913	1.000	1.511	100	1129.730	139.189	116.565	0.676	2.000	0.500	1.000
688	2.283	1.000	2.436	100	225.676	139.865	146.310	1.351	1.553	0.644	0.909
689	0.913	1.000	1.511	100	258.784	139.865	153.435	0.676	2.000	0.500	1.000
690	5.478	0.458	5.733	100	543.919	143.919	45.000	2.389	3.222	0.310	0.585
691	1.370	0.967	2.137	100	796.622	139.865	161.565	0.676	3.000	0.333	1.000
692	1.370	0.967	2.137	100	871.622	139.865	161.565	0.676	3.000	0.333	1.000
693	1.826	0.740	2.786	100	221.622	140.541	165.964	0.676	4.000	0.250	1.000
694	0.913	1.000	1.511	100	308.108	140.541	153.435	0.676	2.000	0.500	1.000
695	0.457	1.000	0.956	100	556.081	140.541	135.000	0.676	1.000	1.000	1.000
696	3.652	0.539	4.273	100	908.108	140.541	108.435	1.351	3.759	0.266	0.800
697	1.370	1.000	1.911	100	910.135	140.541	135.000	1.351	1.464	0.683	0.857
698	2.283	0.873	2.867	100	1112.838	140.541	135.000	1.814	1.882	0.531	0.714
699	0.457	1.000	0.956	100	254.054	141.216	135.000	0.676	1.000	1.000	1.000
700	0.457	1.000	0.956	100	551.351	141.216	135.000	0.676	1.000	1.000	1.000
701	0.457	1.000	0.956	100	372.297	141.892	135.000	0.676	1.000	1.000	1.000
702	4.109	0.832	3.639	100	913.514	141.892	158.199	1.351	2.386	0.419	0.947
703	4.109	0.799	3.822	100	968.919	141.892	135.000	1.911	2.113	0.473	0.818
704	1.826	1.000	1.911	100	247.297	142.568	135.000	1.351	1.000	1.000	1.000
705	0.913	1.000	1.511	100	556.081	142.568	116.565	0.676	2.000	0.500	1.000
706	25.110	0.791	7.309	100	237.838	143.919	146.310	5.405	1.270	0.787	0.866
707	0.457	1.000	0.956	100	302.027	143.243	135.000	0.676	1.000	1.000	1.000
708	0.457	1.000	0.956	100	307.432	143.243	135.000	0.676	1.000	1.000	1.000
709	1.370	0.967	2.137	100	394.595	143.243	161.565	0.676	3.000	0.333	1.000
710	0.913	1.000	1.511	100	259.459	143.919	116.565	0.676	2.000	0.500	1.000
711	0.457	1.000	0.956	100	324.324	143.919	135.000	0.676	1.000	1.000	1.000
712	21.914	0.528	7.704	95.833	478.378	151.351	37.875	6.358	1.101	0.908	0.681
713	61.176	0.208	15.759	98.507	527.703	153.378	30.964	9.858	1.737	0.576	0.629
714	0.457	1.000	0.956	100	542.568	143.919	135.000	0.676	1.000	1.000	1.000
715	0.457	1.000	0.956	100	545.270	143.919	135.000	0.676	1.000	1.000	1.000
716	1.370	0.967	2.137	100	115.541	144.595	161.565	0.676	3.000	0.333	1.000
717	0.913	1.000	1.511	100	874.324	144.595	153.435	0.676	2.000	0.500	1.000
718	571.129	0.286	45.951	99.760	32.432	189.189	70.233	22.887	2.410	0.415	0.724
719	0.457	1.000	0.956	100	183.108	145.270	135.000	0.676	1.000	1.000	1.000
720	0.457	1.000	0.956	100	1020.946	145.270	135.000	0.676	1.000	1.000	1.000
721	0.457	1.000	0.956	100	1123.649	145.270	135.000	0.676	1.000	1.000	1.000
722	0.913	1.000	1.511	100	300.000	145.946	153.435	0.676	2.000	0.500	1.000
723	0.457	1.000	0.956	100	635.811	145.946	135.000	0.676	1.000	1.000	1.000
724	0.457	1.000	0.956	100	792.568	145.946	135.000	0.676	1.000	1.000	1.000
725	7.305	0.671	4.533	100	792.568	147.973	26.565	3.378	1.291	0.775	0.711
726	0.457	1.000	0.956	100	870.270	145.946	135.000	0.676	1.000	1.000	1.000
727	0.913	1.000	1.511	100	874.324	145.946	153.435	0.676	2.000	0.500	1.000
728	1.826	1.000	1.911	100	1027.703	145.946	135.000	1.351	1.000	1.000	1.000
729	0.913	1.000	1.511	100	1107.432	145.946	116.565	0.676	2.000	0.500	1.000
730	1.826	1.000	2.436	100	210.811	147.973	33.690	1.351	2.000	0.500	0.800
731	0.913	1.000	1.511	100	324.324	146.622	116.565	0.676	2.000	0.500	1.000
732	0.457	1.000	0.956	100	551.351	146.622	135.000	0.676	1.000	1.000	1.000
733	1.370	0.967	2.137	100	782.432	146.622	161.565	0.676	3.000	0.333	1.000
734	2.283	0.764	3.022	100	762.162	148.649	26.565	1.351	2.749	0.364	0.769
735	0.913	1.000	1.511	100	299.324	147.973	153.435	0.676	2.000	0.500	1.000
736	0.457	1.000	0.956	100	327.027	147.973	135.000	0.676	1.000	1.000	1.000
737	1.370	0.967	2.137	100	633.108	147.973	161.565	0.676	3.000	0.333	1.000
738	7.761	0.649	5.447	100	778.378	150.676	29.745	2.867	2.153	0.464	0.739
739	0.913	1.000	1.511	100	1105.405	147.973	153.435	0.676	2.000	0.500	1.000
740	1.370	0.967	2.137	100	318.919	148.649	161.565	0.676	3.000	0.333	1.000
741	1.826	1.000	1.911	100	756.757	148.649	135.000	1.351	1.000	1.000	1.000
742	0.457	1.000	0.956	100	909.459	148.649	135.000	0.676	1.000	1.000	1.000
743	3.652	0.429	4.872	100	1093.243	151.351	33.690	1.690	3.969	0.252	0.571
744	11.413	0.291	10.511	100	168.919	149.324	135.000	2.647	5.042	0.198	0.562
745	0.457	1.000	0.956	100	299.324	149.324	135.000	0.676	1.000	1.000	1.000
746	0.913	1.000	1.511	100	410.135	149.324	116.565	0.676	2.000	0.500	1.000
747	0.913	1.000	1.511	100	636.486	149.324	153.435	0.676	2.000	0.500	1.000
748	4.565	1.000	3.378	100	753.378	151.351	36.870	2.027	1.559	0.641	0.909
749	35.153	0.122	26.073	100	861.486	171.622	58.782	4.848	7.451	0.134	0.356
750	13.240	0.523	6.757	100	151.351	154.054	36.870	3.847	1.730	0.578	0.725
751	1.370	1.000	1.911	100	279.730	151.351	45.000	1.351	1.464	0.683	0.857
752	1.370	1.000	1.911	100	405.405	150.000	135.000	1.351	1.464	0.683	0.857
753	1.370	0.967	2.137	100	1104.054	150.000	161.565	0.676	3.000	0.333	1.000
754	0.457	1.000	0.956	100	127.703	151.351	135.000	0.676	1.000	1.000	1.000
755	0.457	1.000	0.956	100	318.919	151.351	135.000	0.676	1.000	1.000	1.000
756	2.739	1.000	2.867	100	324.324	153.378	45.000	1.814	1.809	0.553	0.800
757	0.913	1.000	1.511	100	341.892	151.351	153.435	0.676	2.000	0.500	1.000
758	2.283	1.000	2.436	100	365.541	151.351	123.690	1.351	1.553	0.644	0.909
759	0.457	1.000	0.956	100	637.838	151.351	135.000	0.676	1.000	1.000	1.000
760	0.457	1.000	0.956	100	781.757	151.351	135.000	0.676	1.000	1.000	1.000
761	0.457	1.000	0.956	100	799.324	151.351	135.000	0.676	1.000	1.000	1.000
762	12.783	0.718	5.773	100	956.081	156.757	69.444	3.847	1.453	0.688	0.800
763	0.457	1.000	0.956	100	125.676	152.703	135.000	0.676	1.000	1.000	1.000
764	2.739	0.532	3.639	100	315.541	154.054	21.801	1.710	2.901	0.345	0.600
765	0.457	1.000	0.956	100	551.351	152.703	135.000	0.676	1.000	1.000	1.000
766	0.457	1.000	0.956	100	1086.486	152.703	135.000	0.676	1.000	1.000	1.000
767	36.523	0.192	16.619	100	277.027	153.378	116.565	6.101	3.249	0.308	0.516
768	1.370	0.967	2.137	100	535.135	153.378	161.565	0.676	3.000	0.333	1.000
769	0.913	1.000	1.511	100	637.838	153.378	116.565	0.676	2.000	0.500	1.000
770	2.739	0.809	2.786	100	741.216	153.378	104.036	1.351	1.809	0.553	0.857
771	2.283	0.599	3.445	100	1072.297	153.378	168.690	0.676	5.000	0.200	1.000
772	0.457	1.000	0.956	100	150.000	154.054	135.000	0.676	1.000	1.000	1.000
773	0.913	1.000	1.511	100	335.135	154.730	153.435	0.676	2.000	0.500	1.000
774	0.913	0.785	1.911	100	383.108	154.730	135.000	0.956	2.646	0.378	0.667
775	1.370	0.967	2.137	100	391.216	154.730	161.565	0.676	3.000	0.333	1.000
776	0.913	1.000	1.511	100	490.541	154.730	153.435	0.676	2.000	0.500	1.000
777	2.283	0.572	3.378	100	1017.568	154.730	126.870	1.690	2.511	0.398	0.625
778	1.370	1.000	1.911	100	1048.649	156.081	45.000	1.351	1.464	0.683	0.857
779	0.913	1.000	1.511	100	1054.054	154.730	116.565	0.676	2.000	0.500	1.000
780	0.913	1.000	1.511	100	1070.270	154.730	153.435	0.676	2.000	0.500	1.000
781	0.457	1.000	0.956	100	227.703	155.405	135.000	0.676	1.000	1.000	1.000
782	0.457	1.000	0.956	100	322.297	156.081	135.000	0.676	1.000	1.000	1.000
783	0.457	1.000	0.956	100	391.892	156.081	135.000	0.676	1.000	1.000	1.000
784	1.826	1.000	2.436	100	977.703	157.432	33.690	1.351	2.031	0.492	0.800
785	0.457	1.000	0.956	100	177.703	156.757	135.000	0.676	1.000	1.000	1.000
786	0.457	1.000	0.956	100	227.027	156.757	135.000	0.676	1.000	1.000	1.000
787	0.457	1.000	0.956	100	974.324	156.757	135.000	0.676	1.000	1.000	1.000
788	0.913	1.000	1.511	100	994.595	156.757	116.565	0.676	2.000	0.500	1.000
789	13.240	0.186	8.248	96.552	1023.649	158.108	145.008	4.735	1.723	0.580	0.475
790	0.913	1.000	1.511	100	281.081	157.432	153.435	0.676	2.000	0.500	1.000
791	0.457	1.000	0.956	100	348.649	157.432	135.000	0.676	1.000	1.000	1.000
792	0.457	1.000	0.956	100	372.973	157.432	135.000	0.676	1.000	1.000	1.000
793	0.457	1.000	0.956	100	388.514	158.108	135.000	0.676	1.000	1.000	1.000
794	4.565	0.982	3.822	100	525.676	160.811	45.000	1.911	2.217	0.451	0.833
795	0.457	1.000	0.956	100	605.405	158.108	135.000	0.676	1.000	1.000	1.000
796	0.913	1.000	1.511	100	609.459	158.108	153.435	0.676	2.000	0.500	1.000
797	0.457	1.000	0.956	100	627.027	158.108	135.000	0.676	1.000	1.000	1.000
798	0.457	1.000	0.956	100	912.838	158.108	135.000	0.676	1.000	1.000	1.000
799	0.457	1.000	0.956	100	951.351	158.108	135.000	0.676	1.000	1.000	1.000
800	3.652	0.914	3.022	100	974.324	159.459	26.565	2.027	1.554	0.644	0.800
801	1.826	0.611	3.022	100	1020.270	158.108	153.435	1.209	3.493	0.286	0.667
802	0.913	1.000	1.511	100	347.297	158.784	153.435	0.676	2.000	0.500	1.000
803	0.457	1.000	0.956	100	631.757	158.784	135.000	0.676	1.000	1.000	1.000
804	0.457	1.000	0.956	100	181.081	159.459	135.000	0.676	1.000	1.000	1.000
805	0.457	1.000	0.956	100	529.054	159.459	135.000	0.676	1.000	1.000	1.000
806	0.457	1.000	0.956	100	627.027	159.459	135.000	0.676	1.000	1.000	1.000
807	0.913	1.000	1.511	100	629.054	159.459	153.435	0.676	2.000	0.500	1.000
808	0.913	1.000	1.511	100	953.378	159.459	153.435	0.676	2.000	0.500	1.000
809	0.457	1.000	0.956	100	286.486	160.135	135.000	0.676	1.000	1.000	1.000
810	0.457	1.000	0.956	100	504.730	160.135	135.000	0.676	1.000	1.000	1.000
811	169.375	0.260	25.073	100	509.459	160.135	104.036	12.781	2.291	0.436	0.655
812	46.567	0.130	24.174	99.020	602.703	181.757	63.435	8.043	3.876	0.258	0.392
813	0.913	1.000	1.511	100	972.973	160.135	153.435	0.676	2.000	0.500	1.000
814	0.457	1.000	0.956	100	1129.730	160.135	135.000	0.676	1.000	1.000	1.000
815	1.370	0.754	2.436	100	107.432	160.811	146.310	1.209	2.702	0.370	0.667
816	0.913	1.000	1.511	100	308.108	160.811	153.435	0.676	2.000	0.500	1.000
817	0.913	1.000	1.511	100	350.000	160.811	153.435	0.676	2.000	0.500	1.000
818	0.457	1.000	0.956	100	389.189	160.811	135.000	0.676	1.000	1.000	1.000
819	1.826	0.698	2.867	100	593.919	160.811	135.000	1.433	2.654	0.377	0.667
820	1.370	0.809	2.137	100	642.568	160.811	108.435	0.676	3.000	0.333	1.000
821	0.457	1.000	0.956	100	529.730	161.486	135.000	0.676	1.000	1.000	1.000
822	0.457	1.000	0.956	100	675.676	161.486	135.000	0.676	1.000	1.000	1.000
823	0.913	1.000	1.511	100	181.757	162.162	153.435	0.676	2.000	0.500	1.000
824	2.283	0.873	2.436	100	307.432	164.189	33.690	1.814	1.496	0.668	0.714
825	0.457	1.000	0.956	100	1107.432	162.162	135.000	0.676	1.000	1.000	1.000
826	1.826	0.857	2.436	100	217.568	164.189	33.690	1.351	2.000	0.500	0.800
827	0.457	1.000	0.956	100	528.378	162.838	135.000	0.676	1.000	1.000	1.000
828	0.457	1.000	0.956	100	783.108	162.838	135.000	0.676	1.000	1.000	1.000
829	0.457	1.000	0.956	100	1032.432	162.838	135.000	0.676	1.000	1.000	1.000
830	1.826	0.740	2.786	100	1067.568	162.838	165.964	0.676	4.000	0.250	1.000
831	1.370	1.000	1.911	100	183.108	163.514	135.000	1.351	1.464	0.683	0.857
832	0.457	1.000	0.956	100	291.216	163.514	135.000	0.676	1.000	1.000	1.000
833	1.370	1.000	1.911	100	469.595	163.514	135.000	1.351	1.464	0.683	0.857
834	0.457	1.000	0.956	100	472.973	163.514	135.000	0.676	1.000	1.000	1.000
835	0.913	1.000	1.511	100	1030.405	163.514	153.435	0.676	2.000	0.500	1.000
836	2.283	0.513	3.639	100	1062.838	164.865	21.801	1.284	4.051	0.247	0.667
837	0.913	1.000	1.511	100	1105.405	164.189	153.435	0.676	2.000	0.500	1.000
838	0.457	1.000	0.956	100	219.595	164.865	135.000	0.676	1.000	1.000	1.000
839	7.761	0.414	6.891	100	289.865	166.216	11.310	2.027	3.750	0.267	0.694
840	0.457	1.000	0.956	100	297.297	164.865	135.000	0.676	1.000	1.000	1.000
841	0.457	1.000	0.956	100	329.730	164.865	135.000	0.676	1.000	1.000	1.000
842	1.826	1.000	1.911	100	1039.189	164.865	135.000	1.351	1.000	1.000	1.000
843	0.457	1.000	0.956	100	122.297	165.541	135.000	0.676	1.000	1.000	1.000
844	1.370	0.967	2.137	100	221.622	165.541	161.565	0.676	3.000	0.333	1.000
845	4.565	0.736	4.273	100	231.757	166.892	18.435	1.351	2.795	0.358	0.909
846	4.109	0.799	3.639	100	368.919	165.541	158.199	2.027	2.013	0.497	0.783
847	0.913	1.000	1.511	100	627.027	165.541	116.565	0.676	2.000	0.500	1.000
848	0.457	1.000	0.956	100	642.568	165.541	135.000	0.676	1.000	1.000	1.000
849	1.370	1.000	1.911	100	709.459	166.892	45.000	1.351	1.464	0.683	0.857
850	5.022	0.494	5.277	100	123.649	166.216	140.194	2.254	2.747	0.364	0.629
851	5.935	0.779	3.940	100	1005.405	166.216	149.036	2.027	1.552	0.644	0.897
852	2.283	0.572	3.378	100	1041.892	166.216	143.130	1.690	2.511	0.398	0.625
853	5.022	0.853	4.326	100	185.135	166.892	141.340	1.911	2.498	0.400	0.815
854	12.327	0.571	6.655	100	200.676	172.973	66.038	3.378	1.796	0.557	0.750
855	2.283	0.873	2.436	100	224.324	166.892	123.690	1.814	1.496	0.668	0.714
856	0.457	1.000	0.956	100	629.730	166.892	135.000	0.676	1.000	1.000	1.000
857	0.457	1.000	0.956	100	372.973	167.568	135.000	0.676	1.000	1.000	1.000
858	1.826	1.000	2.137	100	577.703	167.568	161.565	1.351	1.468	0.681	0.800
859	0.457	1.000	0.956	100	627.027	167.568	135.000	0.676	1.000	1.000	1.000
860	0.913	1.000	1.511	100	931.081	167.568	116.565	0.676	2.000	0.500	1.000
861	2.283	0.764	2.786	100	996.622	168.243	165.964	1.351	2.188	0.457	0.769
862	0.913	1.000	1.511	100	1081.081	167.568	153.435	0.676	2.000	0.500	1.000
863	0.457	1.000	0.956	100	1096.622	167.568	135.000	0.676	1.000	1.000	1.000
864	0.457	1.000	0.956	100	1124.324	167.568	135.000	0.676	1.000	1.000	1.000
865	1.826	0.857	2.436	100	945.946	168.243	146.310	1.351	2.000	0.500	0.800
866	2.739	0.686	3.378	100	1039.189	168.243	126.870	1.710	2.391	0.418	0.706
867	1.370	0.967	2.137	100	135.135	168.919	161.565	0.676	3.000	0.333	1.000
868	0.457	1.000	0.956	100	686.486	168.919	135.000	0.676	1.000	1.000	1.000
869	177.137	0.109	38.985	98.711	767.568	204.054	64.323	21.057	2.335	0.428	0.354
870	0.457	1.000	0.956	100	810.135	168.919	135.000	0.676	1.000	1.000	1.000
871	227.812	0.184	36.574	96.593	943.919	168.919	101.725	15.757	2.573	0.389	0.554
872	0.457	1.000	0.956	100	1096.622	168.919	135.000	0.676	1.000	1.000	1.000
873	0.913	1.000	1.511	100	1129.054	168.919	153.435	0.676	2.000	0.500	1.000
874	5.022	0.311	6.891	100	139.189	170.946	11.310	1.351	6.730	0.149	0.710
875	2.283	1.000	2.436	100	225.000	169.595	123.690	1.351	1.553	0.644	0.909
876	0.913	1.000	1.511	100	255.405	169.595	116.565	0.676	2.000	0.500	1.000
877	1.826	1.000	1.911	100	125.676	170.270	135.000	1.351	1.000	1.000	1.000
878	0.457	1.000	0.956	100	197.973	170.270	135.000	0.676	1.000	1.000	1.000
879	0.913	1.000	1.511	100	460.135	170.270	153.435	0.676	2.000	0.500	1.000
880	0.457	1.000	0.956	100	632.432	170.270	135.000	0.676	1.000	1.000	1.000
881	0.457	1.000	0.956	100	1059.459	170.270	135.000	0.676	1.000	1.000	1.000
882	2.739	1.000	2.436	100	151.351	170.946	146.310	1.351	1.500	0.667	1.000
883	0.457	1.000	0.956	100	1096.622	170.946	135.000	0.676	1.000	1.000	1.000
884	18.262	0.363	10.489	100	375.000	174.324	14.931	4.447	2.351	0.425	0.593
885	1.370	0.967	2.137	100	385.811	171.622	161.565	0.676	3.000	0.333	1.000
886	0.457	1.000	0.956	100	1059.459	171.622	135.000	0.676	1.000	1.000	1.000
887	1.370	0.643	2.436	100	1143.243	171.622	123.690	1.209	2.702	0.370	0.667
888	2.739	0.532	2.867	100	254.054	174.324	45.000	2.027	1.255	0.797	0.667
889	0.457	1.000	0.956	100	275.000	172.297	135.000	0.676	1.000	1.000	1.000
890	12.327	0.692	6.689	100	345.946	172.297	135.000	3.519	2.273	0.440	0.794
891	3.196	0.800	3.022	100	737.162	175.000	63.435	2.027	1.571	0.636	0.737
892	0.457	1.000	0.956	100	1041.216	172.297	135.000	0.676	1.000	1.000	1.000
893	0.457	1.000	0.956	100	124.324	172.973	135.000	0.676	1.000	1.000	1.000
894	1.370	0.754	2.436	100	383.108	172.973	146.310	1.209	2.702	0.370	0.667
895	0.457	1.000	0.956	100	431.757	172.973	135.000	0.676	1.000	1.000	1.000
896	0.457	1.000	0.956	100	643.243	172.973	135.000	0.676	1.000	1.000	1.000
897	0.913	1.000	1.511	100	1092.568	172.973	153.435	0.676	2.000	0.500	1.000
898	3.196	0.718	3.445	100	408.108	174.324	168.690	1.351	2.423	0.413	0.824
899	3.652	0.520	4.273	100	858.784	174.324	161.565	1.640	3.412	0.293	0.640
900	0.913	1.000	1.511	100	1042.568	173.649	116.565	0.676	2.000	0.500	1.000
901	1.370	0.967	2.137	100	14.189	174.324	161.565	0.676	3.000	0.333	1.000
902	7.761	0.539	6.119	100	318.919	175.000	173.660	2.027	3.025	0.331	0.773
903	3.652	0.710	3.378	100	1128.378	174.324	126.870	2.027	1.744	0.574	0.727
904	0.913	1.000	1.511	100	856.081	175.000	153.435	0.676	2.000	0.500	1.000
905	35.153	0.579	10.683	97.403	10.135	184.459	55.305	5.436	2.207	0.453	0.806
906	0.457	1.000	0.956	100	145.946	175.676	135.000	0.676	1.000	1.000	1.000
907	1.370	0.967	2.137	100	412.838	175.676	161.565	0.676	3.000	0.333	1.000
908	0.457	1.000	0.956	100	616.216	175.676	135.000	0.676	1.000	1.000	1.000
909	0.457	1.000	0.956	100	859.459	175.676	135.000	0.676	1.000	1.000	1.000
910	9.587	0.568	5.447	100	1042.568	176.351	119.745	3.825	1.453	0.688	0.636
911	0.457	1.000	0.956	100	187.838	177.027	135.000	0.676	1.000	1.000	1.000
912	0.457	1.000	0.956	100	410.811	177.027	135.000	0.676	1.000	1.000	1.000
913	2.739	0.809	3.022	100	484.459	177.027	116.565	1.351	2.082	0.480	0.857
914	0.457	1.000	0.956	100	1096.622	177.027	135.000	0.676	1.000	1.000	1.000
915	0.457	1.000	0.956	100	162.162	177.703	135.000	0.676	1.000	1.000	1.000
916	1.826	0.740	2.786	100	232.432	177.703	165.964	0.676	4.000	0.250	1.000
917	0.457	1.000	0.956	100	318.919	177.703	135.000	0.676	1.000	1.000	1.000
918	8.218	0.868	4.273	100	329.730	182.432	71.565	3.378	1.244	0.804	0.766
919	0.913	1.000	1.511	100	377.703	178.378	153.435	0.676	2.000	0.500	1.000
920	1.826	0.513	2.436	100	383.108	179.730	33.690	1.814	1.517	0.659	0.571
921	5.935	0.545	3.822	100	122.973	179.730	135.000	2.703	1.319	0.758	0.743
922	1.370	0.967	2.137	100	151.351	179.054	161.565	0.676	3.000	0.333	1.000
923	4.109	0.377	4.919	100	347.973	179.730	164.055	1.990	2.584	0.387	0.581
924	3.652	0.820	3.378	100	389.189	179.054	126.870	2.027	1.767	0.566	0.842
925	0.913	1.000	1.511	100	154.730	179.730	153.435	0.676	2.000	0.500	1.000
926	0.457	1.000	0.956	100	156.757	179.730	135.000	0.676	1.000	1.000	1.000
927	0.457	1.000	0.956	100	172.297	179.730	135.000	0.676	1.000	1.000	1.000
928	3.652	0.645	3.940	100	223.649	179.730	149.036	2.027	2.408	0.415	0.696
929	1.370	0.967	2.137	100	151.351	180.405	161.565	0.676	3.000	0.333	1.000
930	0.457	1.000	0.956	100	221.622	180.405	135.000	0.676	1.000	1.000	1.000
931	15.066	0.245	12.459	100	71.622	181.081	130.601	3.017	5.416	0.185	0.520
932	0.457	1.000	0.956	100	161.486	181.081	135.000	0.676	1.000	1.000	1.000
933	4.109	0.726	3.639	100	312.838	184.459	68.199	1.967	2.094	0.477	0.750
934	1.826	1.000	2.436	100	334.459	181.081	146.310	1.351	2.031	0.492	0.800
935	2.283	0.599	3.445	100	383.784	181.081	168.690	0.676	5.000	0.200	1.000
936	1.826	0.740	2.786	100	627.027	181.081	165.964	0.676	4.000	0.250	1.000
937	4.565	0.887	3.940	100	162.162	183.784	30.964	2.027	2.212	0.452	0.833
938	6.392	0.811	4.110	100	279.054	183.108	170.538	2.703	1.565	0.639	0.778
939	0.457	1.000	0.956	100	349.324	181.757	135.000	0.676	1.000	1.000	1.000
940	3.196	0.455	3.378	100	380.405	183.784	36.870	2.027	1.570	0.637	0.667
941	0.457	1.000	0.956	100	594.595	181.757	135.000	0.676	1.000	1.000	1.000
942	1.370	1.000	1.911	100	1044.595	181.757	135.000	1.351	1.464	0.683	0.857
943	0.457	1.000	0.956	100	1097.297	181.757	135.000	0.676	1.000	1.000	1.000
944	8.218	0.388	6.043	100	325.000	183.784	153.435	3.327	2.021	0.495	0.545
945	0.913	1.000	1.511	100	341.892	182.432	153.435	0.676	2.000	0.500	1.000
946	0.457	1.000	0.956	100	133.108	183.108	135.000	0.676	1.000	1.000	1.000
947	6.392	0.535	4.872	100	269.595	183.108	123.690	3.115	1.646	0.608	0.667
948	0.457	1.000	0.956	100	331.081	183.108	135.000	0.676	1.000	1.000	1.000
949	2.283	0.764	3.022	100	333.784	183.108	153.435	1.351	2.610	0.383	0.769
950	1.370	0.967	2.137	100	346.622	183.108	161.565	0.676	3.000	0.333	1.000
951	1.370	0.967	2.137	100	352.703	183.108	161.565	0.676	3.000	0.333	1.000
952	0.457	1.000	0.956	100	383.784	183.108	135.000	0.676	1.000	1.000	1.000
953	0.457	1.000	0.956	100	635.811	183.108	135.000	0.676	1.000	1.000	1.000
954	0.457	1.000	0.956	100	545.946	183.784	135.000	0.676	1.000	1.000	1.000
955	0.913	1.000	1.511	100	1045.270	183.784	153.435	0.676	2.000	0.500	1.000
956	1.370	1.000	1.911	100	8.108	185.811	45.000	1.351	1.464	0.683	0.857
957	0.457	1.000	0.956	100	151.351	184.459	135.000	0.676	1.000	1.000	1.000
958	1.370	0.967	2.137	100	352.027	184.459	161.565	0.676	3.000	0.333	1.000
959	0.457	1.000	0.956	100	421.622	184.459	135.000	0.676	1.000	1.000	1.000
960	8.218	0.281	7.309	100	488.514	185.135	146.310	3.960	2.843	0.352	0.468
961	1.826	0.857	2.436	100	522.973	184.459	146.310	1.351	2.000	0.500	0.800
962	3.196	0.718	3.445	100	339.865	185.135	168.690	1.351	2.423	0.413	0.824
963	31.045	0.506	12.404	100	48.649	185.811	119.358	4.325	3.447	0.290	0.773
964	0.913	1.000	1.511	100	159.459	185.811	153.435	0.676	2.000	0.500	1.000
965	1.370	0.754	2.436	100	370.270	185.811	146.310	1.209	2.702	0.370	0.667
966	0.457	1.000	0.956	100	1047.973	185.811	135.000	0.676	1.000	1.000	1.000
967	46.567	0.303	15.408	98.039	1.351	199.324	52.125	7.559	2.638	0.379	0.616
968	0.457	1.000	0.956	100	345.270	186.486	135.000	0.676	1.000	1.000	1.000
969	0.457	1.000	0.956	100	351.351	186.486	135.000	0.676	1.000	1.000	1.000
970	0.913	1.000	1.511	100	545.946	186.486	153.435	0.676	2.000	0.500	1.000
971	0.457	1.000	0.956	100	54.054	187.162	135.000	0.676	1.000	1.000	1.000
972	11.413	0.176	12.087	100	547.973	187.162	153.435	3.227	5.015	0.199	0.424
973	22.827	0.273	10.045	100	1048.649	187.162	132.274	5.522	1.929	0.518	0.595
974	3.652	0.914	3.378	100	55.405	187.838	126.870	1.911	1.939	0.516	0.842
975	0.457	1.000	0.956	100	151.351	187.838	135.000	0.676	1.000	1.000	1.000
976	0.457	1.000	0.956	100	160.135	187.838	135.000	0.676	1.000	1.000	1.000
977	0.913	1.000	1.511	100	318.243	187.838	153.435	0.676	2.000	0.500	1.000
978	4.109	0.606	4.110	100	331.081	187.838	99.462	1.351	2.779	0.360	0.857
979	1.370	0.967	2.137	100	364.865	187.838	161.565	0.676	3.000	0.333	1.000
980	0.913	1.000	1.511	100	370.270	187.838	116.565	0.676	2.000	0.500	1.000
981	1.826	0.698	2.867	100	945.946	187.838	135.000	1.433	2.654	0.377	0.667
982	5.935	0.438	3.940	100	112.838	188.514	120.964	3.378	1.284	0.779	0.684
983	0.457	1.000	0.956	100	156.081	188.514	135.000	0.676	1.000	1.000	1.000
984	12.327	0.221	9.838	100	335.135	191.892	15.945	2.773	3.930	0.254	0.557
985	3.196	0.898	3.378	100	351.351	190.541	36.870	1.911	2.060	0.485	0.737
986	0.457	1.000	0.956	100	552.703	188.514	135.000	0.676	1.000	1.000	1.000
987	1.370	1.000	1.911	100	108.108	189.189	135.000	1.351	1.464	0.683	0.857
988	1.370	0.967	2.137	100	358.784	189.189	161.565	0.676	3.000	0.333	1.000
989	1.826	0.857	2.436	100	658.784	191.216	56.310	1.351	2.000	0.500	0.800
990	0.457	1.000	0.956	100	1102.703	189.189	135.000	0.676	1.000	1.000	1.000
991	0.913	1.000	1.511	100	318.919	189.865	153.435	0.676	2.000	0.500	1.000
992	0.913	1.000	1.511	100	356.757	189.865	153.435	0.676	2.000	0.500	1.000
993	1.370	0.809	2.137	100	362.838	189.865	108.435	0.676	3.000	0.333	1.000
994	4.565	0.579	4.872	100	368.243	189.865	146.310	1.816	3.863	0.259	0.625
995	7.305	0.857	4.533	100	486.486	190.541	116.565	2.703	1.678	0.596	0.865
996	1.370	1.000	1.911	100	947.973	190.541	135.000	1.351	1.464	0.683	0.857
997	3.196	0.898	2.786	100	209.459	191.892	165.964	2.027	1.387	0.721	0.737
998	3.652	0.914	3.378	100	250.000	193.919	53.130	1.911	1.939	0.516	0.842
999	0.457	1.000	0.956	100	254.054	191.216	135.000	0.676	1.000	1.000	1.000
1000	3.652	0.567	4.326	100	372.973	193.919	38.660	2.031	2.883	0.347	0.640
1001	0.457	1.000	0.956	100	978.378	191.216	135.000	0.676	1.000	1.000	1.000
1002	0.457	1.000	0.956	100	358.108	191.892	135.000	0.676	1.000	1.000	1.000
1003	0.913	0.785	1.911	100	512.838	193.243	45.000	0.956	2.646	0.378	0.667
1004	1.370	1.000	1.911	100	991.892	193.243	45.000	1.351	1.464	0.683	0.857
1005	0.457	1.000	0.956	100	1107.432	191.892	135.000	0.676	1.000	1.000	1.000
1006	4.109	0.799	3.940	100	58.784	192.568	149.036	2.027	2.323	0.431	0.783
1007	16.435	0.183	13.049	97.222	560.135	193.919	158.749	4.698	3.379	0.296	0.373
1008	0.457	1.000	0.956	100	977.703	192.568	135.000	0.676	1.000	1.000	1.000
1009	0.457	1.000	0.956	100	981.081	192.568	135.000	0.676	1.000	1.000	1.000
1010	5.935	0.403	5.812	100	79.730	193.243	125.538	2.565	2.834	0.353	0.553
1011	1.370	1.000	1.911	100	168.919	193.243	135.000	1.351	1.464	0.683	0.857
1012	2.739	0.555	3.445	100	356.757	193.243	101.310	1.351	3.003	0.333	0.750
1013	1.370	0.967	2.137	100	375.676	193.243	161.565	0.676	3.000	0.333	1.000
1014	0.913	1.000	1.511	100	378.378	193.243	153.435	0.676	2.000	0.500	1.000
1015	0.457	1.000	0.956	100	383.108	193.243	135.000	0.676	1.000	1.000	1.000
1016	0.457	1.000	0.956	100	720.946	193.243	135.000	0.676	1.000	1.000	1.000
1017	0.913	1.000	1.511	100	976.351	193.243	116.565	0.676	2.000	0.500	1.000
1018	0.457	1.000	0.956	100	985.811	193.243	135.000	0.676	1.000	1.000	1.000
1019	0.457	1.000	0.956	100	1107.432	193.243	135.000	0.676	1.000	1.000	1.000
1020	0.457	1.000	0.956	100	162.162	193.919	135.000	0.676	1.000	1.000	1.000
1021	0.913	0.785	1.911	100	172.297	193.919	135.000	0.956	2.646	0.378	0.667
1022	0.913	1.000	1.511	100	247.297	193.919	153.435	0.676	2.000	0.500	1.000
1023	0.457	1.000	0.956	100	363.514	193.919	135.000	0.676	1.000	1.000	1.000
1024	0.457	1.000	0.956	100	380.405	193.919	135.000	0.676	1.000	1.000	1.000
1025	0.457	1.000	0.956	100	535.135	193.919	135.000	0.676	1.000	1.000	1.000
1026	2.739	0.916	3.022	100	555.405	193.919	153.435	1.351	2.082	0.480	0.857
1027	5.478	0.227	6.374	100	564.865	193.919	147.995	2.867	2.631	0.380	0.471
1028	2.739	0.916	3.022	100	944.595	195.270	26.565	1.351	2.237	0.447	0.857
1029	6.392	0.587	4.326	100	296.622	194.595	141.340	2.703	1.444	0.692	0.778
1030	0.457	1.000	0.956	100	372.973	194.595	135.000	0.676	1.000	1.000	1.000
1031	0.913	1.000	1.511	100	459.459	194.595	116.565	0.676	2.000	0.500	1.000
1032	0.457	1.000	0.956	100	637.838	194.595	135.000	0.676	1.000	1.000	1.000
1033	0.457	1.000	0.956	100	859.459	194.595	135.000	0.676	1.000	1.000	1.000
1034	2.283	0.674	3.022	100	1056.081	194.595	116.565	1.351	2.610	0.383	0.769
1035	1.370	1.000	1.911	100	168.919	196.622	45.000	1.351	1.464	0.683	0.857
1036	0.457	1.000	0.956	100	185.811	195.270	135.000	0.676	1.000	1.000	1.000
1037	1.826	1.000	2.436	100	364.189	195.270	146.310	1.351	2.031	0.492	0.800
1038	81.264	0.255	23.062	100	500.000	195.270	121.827	7.722	3.641	0.275	0.599
1039	115.047	0.537	20.371	100	906.081	215.541	84.289	8.108	2.501	0.400	0.862
1040	0.457	1.000	0.956	100	940.541	195.270	135.000	0.676	1.000	1.000	1.000
1041	0.913	1.000	1.511	100	1059.459	195.270	153.435	0.676	2.000	0.500	1.000
1042	0.913	1.000	1.511	100	378.378	195.946	153.435	0.676	2.000	0.500	1.000
1043	0.457	1.000	0.956	100	536.486	195.946	135.000	0.676	1.000	1.000	1.000
1044	2.739	1.000	2.867	100	937.838	197.973	45.000	1.814	1.809	0.553	0.800
1045	0.913	1.000	1.511	100	991.216	195.946	116.565	0.676	2.000	0.500	1.000
1046	4.109	0.799	3.378	100	243.243	199.324	53.130	2.389	1.417	0.706	0.750
1047	0.457	1.000	0.956	100	302.703	196.622	135.000	0.676	1.000	1.000	1.000
1048	0.457	1.000	0.956	100	502.703	196.622	135.000	0.676	1.000	1.000	1.000
1049	0.913	1.000	1.511	100	6.757	197.297	153.435	0.676	2.000	0.500	1.000
1050	2.283	1.000	2.436	100	45.946	197.297	146.310	1.351	1.553	0.644	0.909
1051	1.826	1.000	2.137	100	364.189	197.973	161.565	1.351	1.468	0.681	0.800
1052	0.457	1.000	0.956	100	41.216	197.973	135.000	0.676	1.000	1.000	1.000
1053	0.457	1.000	0.956	100	113.514	197.973	135.000	0.676	1.000	1.000	1.000
1054	2.283	0.599	3.445	100	237.838	197.973	168.690	0.676	5.000	0.200	1.000
1055	0.457	1.000	0.956	100	304.730	197.973	135.000	0.676	1.000	1.000	1.000
1056	0.457	1.000	0.956	100	362.162	197.973	135.000	0.676	1.000	1.000	1.000
1057	5.478	0.240	8.220	100	425.000	199.324	9.462	1.338	9.104	0.110	0.667
1058	0.913	1.000	1.511	100	504.054	197.973	153.435	0.676	2.000	0.500	1.000
1059	0.457	1.000	0.956	100	863.514	197.973	135.000	0.676	1.000	1.000	1.000
1060	6.392	0.444	5.277	100	983.784	201.351	39.806	3.065	2.006	0.498	0.596
1061	1.370	0.967	2.137	100	1059.459	197.973	161.565	0.676	3.000	0.333	1.000
1062	0.913	1.000	1.511	100	3.378	198.649	116.565	0.676	2.000	0.500	1.000
1063	0.457	1.000	0.956	100	367.568	198.649	135.000	0.676	1.000	1.000	1.000
1064	0.913	1.000	1.511	100	1063.514	198.649	153.435	0.676	2.000	0.500	1.000
1065	0.457	1.000	0.956	100	4.730	199.324	135.000	0.676	1.000	1.000	1.000
1066	2.283	0.764	3.022	100	16.216	200.676	26.565	1.351	2.610	0.383	0.769
1067	56.154	0.339	17.619	100	81.081	200.000	122.471	5.846	3.550	0.282	0.656
1068	145.179	0.233	28.120	99.371	187.838	199.324	125.218	11.806	3.101	0.323	0.619
1069	1.370	0.967	2.137	100	246.622	199.324	161.565	0.676	3.000	0.333	1.000
1070	0.457	1.000	0.956	100	102.703	200.000	135.000	0.676	1.000	1.000	1.000
1071	0.913	1.000	1.511	100	162.162	200.000	153.435	0.676	2.000	0.500	1.000
1072	0.457	1.000	0.956	100	254.054	200.000	135.000	0.676	1.000	1.000	1.000
1073	0.457	1.000	0.956	100	427.027	200.000	135.000	0.676	1.000	1.000	1.000
1074	0.457	1.000	0.956	100	1.351	200.676	135.000	0.676	1.000	1.000	1.000
1075	0.913	1.000	1.511	100	136.486	200.676	153.435	0.676	2.000	0.500	1.000
1076	22.370	0.667	9.065	100	281.081	200.676	116.565	4.054	2.408	0.415	0.860
1077	0.913	1.000	1.511	100	162.162	201.351	153.435	0.676	2.000	0.500	1.000
1078	15.066	0.296	10.683	100	922.973	204.730	18.435	3.335	4.144	0.241	0.600
1079	4.109	0.799	3.822	100	1133.784	204.054	45.000	2.063	2.239	0.447	0.750
1080	51.589	0.609	11.546	100	738.514	212.838	69.444	7.432	1.509	0.663	0.853
1081	1.370	1.000	1.911	100	56.081	202.703	135.000	1.351	1.464	0.683	0.857
1082	0.913	1.000	1.511	100	308.108	202.703	153.435	0.676	2.000	0.500	1.000
1083	0.457	1.000	0.956	100	989.189	202.703	135.000	0.676	1.000	1.000	1.000
1084	198.137	0.379	29.109	98.848	47.973	208.108	158.199	13.503	1.961	0.510	0.765
1085	3.196	0.718	3.378	100	133.108	206.757	53.130	2.027	1.918	0.521	0.778
1086	33.327	0.528	10.314	100	783.784	204.054	148.392	6.444	1.604	0.623	0.749
1087	0.457	1.000	0.956	100	934.459	204.054	135.000	0.676	1.000	1.000	1.000
1088	2.739	0.484	3.940	100	1058.108	204.054	120.964	1.690	3.231	0.310	0.600
1089	0.457	1.000	0.956	100	140.541	204.730	135.000	0.676	1.000	1.000	1.000
1090	9.131	0.657	5.146	100	144.595	204.730	156.801	3.378	1.444	0.692	0.741
1091	0.913	0.785	1.911	100	654.730	204.730	135.000	0.956	2.646	0.378	0.667
1092	2.283	0.444	3.822	100	931.081	207.432	45.000	1.433	3.633	0.275	0.526
1093	0.457	1.000	0.956	100	941.892	204.730	135.000	0.676	1.000	1.000	1.000
1094	1.370	0.809	2.137	100	1010.811	204.730	108.435	0.676	3.000	0.333	1.000
1095	0.913	1.000	1.511	100	1023.649	204.730	153.435	0.676	2.000	0.500	1.000
1096	5.022	0.976	3.639	90.909	1129.054	206.757	21.801	2.027	1.619	0.618	0.846
1097	2.283	1.000	2.436	100	224.324	205.405	146.310	1.351	1.553	0.644	0.909
1098	3.652	0.914	3.378	100	718.919	207.432	36.870	1.925	1.989	0.503	0.800
1099	0.457	1.000	0.956	100	936.486	205.405	135.000	0.676	1.000	1.000	1.000
1100	0.913	1.000	1.511	100	940.541	205.405	116.565	0.676	2.000	0.500	1.000
1101	3.196	0.718	3.639	100	1026.351	205.405	158.199	1.351	2.731	0.366	0.824
1102	0.457	1.000	0.956	100	181.757	206.081	135.000	0.676	1.000	1.000	1.000
1103	0.457	1.000	0.956	100	243.243	206.081	135.000	0.676	1.000	1.000	1.000
1104	2.283	1.000	2.436	100	149.324	208.108	33.690	1.351	1.553	0.644	0.909
1105	0.457	1.000	0.956	100	470.270	206.757	135.000	0.676	1.000	1.000	1.000
1106	2.739	1.000	2.867	100	674.324	208.784	45.000	1.814	1.809	0.553	0.800
1107	0.457	1.000	0.956	100	135.811	207.432	135.000	0.676	1.000	1.000	1.000
1108	0.457	1.000	0.956	100	221.622	207.432	135.000	0.676	1.000	1.000	1.000
1109	0.457	1.000	0.956	100	936.486	207.432	135.000	0.676	1.000	1.000	1.000
1110	1.370	1.000	1.911	100	1011.486	207.432	135.000	1.351	1.464	0.683	0.857
1111	0.457	1.000	0.956	100	1027.027	207.432	135.000	0.676	1.000	1.000	1.000
1112	0.457	1.000	0.956	100	643.243	208.108	135.000	0.676	1.000	1.000	1.000
1113	36.066	0.657	10.292	100	652.027	214.865	23.199	6.490	1.514	0.660	0.794
1114	0.457	1.000	0.956	100	939.865	208.108	135.000	0.676	1.000	1.000	1.000
1115	2.739	1.000	2.867	100	945.946	210.135	45.000	1.814	1.809	0.553	0.800
1116	1.826	0.539	3.022	100	1060.811	208.108	116.565	1.209	3.493	0.286	0.667
1117	0.457	1.000	0.956	100	128.378	208.784	135.000	0.676	1.000	1.000	1.000
1118	1.826	0.857	2.436	100	174.324	210.135	33.690	1.351	2.000	0.500	0.800
1119	21.001	0.335	12.997	100	628.378	212.162	8.973	3.156	4.725	0.212	0.713
1120	0.457	1.000	0.956	100	672.973	208.784	135.000	0.676	1.000	1.000	1.000
1121	0.913	1.000	1.511	100	129.730	209.459	153.435	0.676	2.000	0.500	1.000
1122	0.457	1.000	0.956	100	322.973	209.459	135.000	0.676	1.000	1.000	1.000
1123	0.457	1.000	0.956	100	469.595	209.459	135.000	0.676	1.000	1.000	1.000
1124	0.913	1.000	1.511	100	793.243	209.459	153.435	0.676	2.000	0.500	1.000
1125	1.370	0.754	2.436	100	929.054	210.811	33.690	1.209	2.702	0.370	0.667
1126	0.457	1.000	0.956	100	145.270	210.135	135.000	0.676	1.000	1.000	1.000
1127	0.457	1.000	0.956	100	466.892	210.135	135.000	0.676	1.000	1.000	1.000
1128	64.828	0.467	13.681	100	665.541	219.595	32.905	9.178	1.346	0.743	0.757
1129	0.457	1.000	0.956	100	940.541	210.135	135.000	0.676	1.000	1.000	1.000
1130	0.913	1.000	1.511	100	1106.757	210.135	153.435	0.676	2.000	0.500	1.000
1131	6.848	0.476	6.229	100	678.378	210.811	167.471	2.027	3.588	0.279	0.750
1132	73.503	0.554	15.759	100	790.541	214.865	149.036	8.224	2.315	0.432	0.780
1133	0.913	1.000	1.511	100	942.568	210.811	153.435	0.676	2.000	0.500	1.000
1134	0.913	1.000	1.511	100	1104.730	210.811	153.435	0.676	2.000	0.500	1.000
1135	2.283	1.000	2.436	100	1121.622	210.811	123.690	1.351	1.553	0.644	0.909
1136	2.283	1.000	2.436	100	178.378	212.838	33.690	1.351	1.553	0.644	0.909
1137	1.370	0.967	2.137	100	183.108	211.486	161.565	0.676	3.000	0.333	1.000
1138	0.457	1.000	0.956	100	356.757	211.486	135.000	0.676	1.000	1.000	1.000
1139	4.109	1.000	3.378	100	437.838	214.189	53.130	2.027	1.542	0.648	0.857
1140	1.370	1.000	1.911	100	709.459	212.838	45.000	1.351	1.464	0.683	0.857
1141	0.457	1.000	0.956	100	845.946	211.486	135.000	0.676	1.000	1.000	1.000
1142	0.913	1.000	1.511	100	927.703	211.486	116.565	0.676	2.000	0.500	1.000
1143	1.826	1.000	2.137	100	143.243	212.162	161.565	1.351	1.468	0.681	0.800
1144	14.153	0.175	13.781	100	156.081	212.162	168.690	2.373	8.425	0.119	0.512
1145	3.196	0.943	3.022	100	190.541	212.162	116.565	1.351	1.936	0.517	0.933
1146	0.457	1.000	0.956	100	193.919	212.162	135.000	0.676	1.000	1.000	1.000
1147	1.370	0.809	2.137	100	562.162	212.162	108.435	0.676	3.000	0.333	1.000
1148	2.283	1.000	2.436	100	620.946	213.514	33.690	1.351	1.553	0.644	0.909
1149	3.196	0.621	3.378	100	943.919	212.162	143.130	2.027	1.832	0.546	0.700
1150	14.153	0.348	9.065	96.774	1061.486	212.162	116.565	3.930	3.120	0.320	0.596
1151	0.913	1.000	1.511	100	181.757	212.838	153.435	0.676	2.000	0.500	1.000
1152	5.022	0.715	4.326	100	433.784	215.541	38.660	2.117	2.315	0.432	0.786
1153	0.457	1.000	0.956	100	462.162	212.838	135.000	0.676	1.000	1.000	1.000
1154	0.457	1.000	0.956	100	745.946	212.838	135.000	0.676	1.000	1.000	1.000
1155	5.478	1.000	3.378	100	134.459	215.541	36.870	2.703	1.135	0.881	0.857
1156	0.457	1.000	0.956	100	788.514	213.514	135.000	0.676	1.000	1.000	1.000
1157	0.913	1.000	1.511	100	182.432	214.189	153.435	0.676	2.000	0.500	1.000
1158	0.913	1.000	1.511	100	619.595	214.189	116.565	0.676	2.000	0.500	1.000
1159	0.457	1.000	0.956	100	960.811	214.189	135.000	0.676	1.000	1.000	1.000
1160	0.457	1.000	0.956	100	1020.946	214.189	135.000	0.676	1.000	1.000	1.000
1161	7.305	0.539	5.773	100	139.189	216.892	20.556	2.027	2.587	0.387	0.762
1162	1.370	0.754	2.436	100	464.189	216.216	33.690	1.209	2.702	0.370	0.667
1163	9.131	0.541	6.410	100	685.135	217.568	18.435	3.066	2.422	0.413	0.635
1164	4.109	0.638	4.326	100	90.541	215.541	128.660	1.816	3.093	0.323	0.667
1165	0.457	1.000	0.956	100	270.270	215.541	135.000	0.676	1.000	1.000	1.000
1166	52.958	0.224	21.463	98.276	414.189	225.676	28.179	5.146	5.162	0.194	0.611
1167	31.501	0.237	16.342	100	735.135	216.216	172.875	4.730	3.911	0.256	0.556
1168	0.457	1.000	0.956	100	921.622	215.541	135.000	0.676	1.000	1.000	1.000
1169	0.913	1.000	1.511	100	1020.946	215.541	116.565	0.676	2.000	0.500	1.000
1170	7.761	0.393	6.891	100	43.243	216.216	101.310	2.027	4.778	0.209	0.667
1171	57.980	0.578	12.568	98.425	506.757	216.216	143.746	8.878	1.318	0.759	0.786
1172	1.370	0.967	2.137	100	967.568	216.216	161.565	0.676	3.000	0.333	1.000
1173	0.913	0.785	1.911	100	1085.811	217.568	45.000	0.956	2.646	0.378	0.667
1174	0.913	1.000	1.511	100	679.054	216.892	153.435	0.676	2.000	0.500	1.000
1175	3.652	0.785	3.378	100	904.054	219.595	36.870	2.254	1.859	0.538	0.696
1176	104.547	0.319	22.061	96.943	958.108	216.892	152.650	9.258	2.894	0.346	0.727
1177	1.826	1.000	1.911	100	141.892	217.568	135.000	1.351	1.000	1.000	1.000
1178	72.589	0.294	25.000	100	587.162	225.676	18.925	5.989	5.734	0.174	0.687
1179	0.913	1.000	1.511	100	1024.324	217.568	153.435	0.676	2.000	0.500	1.000
1180	2.283	0.873	2.137	100	37.838	218.243	108.435	1.911	1.000	1.000	0.714
1181	0.457	1.000	0.956	100	48.649	218.243	135.000	0.676	1.000	1.000	1.000
1182	0.457	1.000	0.956	100	687.838	218.243	135.000	0.676	1.000	1.000	1.000
1183	0.457	1.000	0.956	100	986.486	218.243	135.000	0.676	1.000	1.000	1.000
1184	1.370	1.000	1.911	100	464.865	218.919	135.000	1.351	1.464	0.683	0.857
1185	0.457	1.000	0.956	100	537.838	218.919	135.000	0.676	1.000	1.000	1.000
1186	0.913	1.000	1.511	100	1018.243	218.919	153.435	0.676	2.000	0.500	1.000
1187	0.457	1.000	0.956	100	1027.027	218.919	135.000	0.676	1.000	1.000	1.000
1188	2.283	1.000	2.436	100	92.568	219.595	146.310	1.351	1.553	0.644	0.909
1189	168.006	0.238	27.777	98.641	272.297	232.432	18.435	11.610	2.616	0.382	0.661
1190	0.457	1.000	0.956	100	868.243	219.595	135.000	0.676	1.000	1.000	1.000
1191	0.913	1.000	1.511	100	1095.270	219.595	153.435	0.676	2.000	0.500	1.000
1192	0.913	1.000	1.511	100	1131.081	219.595	116.565	0.676	2.000	0.500	1.000
1193	0.913	1.000	1.511	100	1143.243	219.595	153.435	0.676	2.000	0.500	1.000
1194	1.370	0.967	2.137	100	143.919	220.946	161.565	0.676	3.000	0.333	1.000
1195	1.826	1.000	2.436	100	194.595	222.297	33.690	1.351	2.000	0.500	0.800
1196	26.936	0.210	14.060	100	655.405	229.054	35.218	5.891	2.976	0.336	0.500
1197	7.305	0.772	4.273	100	806.757	222.973	18.435	3.344	1.255	0.797	0.727
1198	0.913	1.000	1.511	100	1095.270	220.946	153.435	0.676	2.000	0.500	1.000
1199	6.848	0.804	4.533	100	1112.838	220.946	116.565	2.653	1.789	0.559	0.769
1200	0.457	1.000	0.956	100	1140.541	220.946	135.000	0.676	1.000	1.000	1.000
1201	0.913	1.000	1.511	100	197.297	221.622	116.565	0.676	2.000	0.500	1.000
1202	189.463	0.388	26.909	92.289	729.054	223.649	151.504	13.125	1.955	0.512	0.782
1203	0.913	1.000	1.511	100	1011.486	221.622	153.435	0.676	2.000	0.500	1.000
1204	0.457	1.000	0.956	100	1029.054	221.622	135.000	0.676	1.000	1.000	1.000
1205	0.457	1.000	0.956	100	1043.243	221.622	135.000	0.676	1.000	1.000	1.000
1206	0.913	1.000	1.511	100	1066.216	221.622	116.565	0.676	2.000	0.500	1.000
1207	2.739	0.441	4.273	100	1100.000	222.973	18.435	1.311	4.593	0.218	0.667
1208	0.457	1.000	0.956	100	1127.703	221.622	135.000	0.676	1.000	1.000	1.000
1209	0.457	1.000	0.956	100	95.946	222.297	135.000	0.676	1.000	1.000	1.000
1210	5.478	0.441	5.447	100	145.946	222.297	97.125	1.861	3.569	0.280	0.667
1211	0.457	1.000	0.956	100	535.135	222.297	135.000	0.676	1.000	1.000	1.000
1212	0.913	1.000	1.511	100	845.270	222.297	153.435	0.676	2.000	0.500	1.000
1213	26.023	0.447	9.838	100	980.405	226.351	15.945	5.387	2.199	0.455	0.667
1214	0.913	1.000	1.511	100	1091.892	222.297	116.565	0.676	2.000	0.500	1.000
1215	0.457	1.000	0.956	100	1094.595	222.297	135.000	0.676	1.000	1.000	1.000
1216	0.457	1.000	0.956	100	195.946	222.973	135.000	0.676	1.000	1.000	1.000
1217	0.913	1.000	1.511	100	481.081	222.973	153.435	0.676	2.000	0.500	1.000
1218	0.457	1.000	0.956	100	1129.054	222.973	135.000	0.676	1.000	1.000	1.000
1219	1.826	0.645	2.786	100	43.243	223.649	104.036	0.676	4.000	0.250	1.000
1220	0.457	1.000	0.956	100	232.432	223.649	135.000	0.676	1.000	1.000	1.000
1221	6.848	0.384	6.655	100	672.297	223.649	156.038	2.419	3.698	0.270	0.625
1222	74.872	0.242	14.617	90.244	715.541	235.811	33.690	11.013	1.452	0.689	0.651
1223	0.913	1.000	1.511	100	1010.811	223.649	116.565	0.676	2.000	0.500	1.000
1224	2.739	1.000	2.436	100	29.054	226.351	33.690	1.911	1.291	0.775	0.800
1225	42.915	0.136	28.411	100	96.622	224.324	115.346	3.343	11.515	0.087	0.525
1226	0.457	1.000	0.956	100	194.595	224.324	135.000	0.676	1.000	1.000	1.000
1227	0.913	1.000	1.511	100	466.216	224.324	153.435	0.676	2.000	0.500	1.000
1228	1.370	1.000	1.911	100	488.514	225.676	45.000	1.351	1.464	0.683	0.857
1229	0.457	1.000	0.956	100	572.973	224.324	135.000	0.676	1.000	1.000	1.000
1230	0.457	1.000	0.956	100	889.189	225.000	135.000	0.676	1.000	1.000	1.000
1231	0.457	1.000	0.956	100	491.216	225.676	135.000	0.676	1.000	1.000	1.000
1232	73.959	0.190	31.264	100	543.919	229.730	6.203	5.689	7.385	0.135	0.572
1233	0.457	1.000	0.956	100	577.703	225.676	135.000	0.676	1.000	1.000	1.000
1234	1.370	0.967	2.137	100	670.270	225.676	161.565	0.676	3.000	0.333	1.000
1235	5.022	0.887	3.940	100	304.730	226.351	149.036	2.027	1.915	0.522	0.880
1236	0.913	1.000	1.511	100	641.892	226.351	153.435	0.676	2.000	0.500	1.000
1237	0.913	1.000	1.511	100	805.405	226.351	153.435	0.676	2.000	0.500	1.000
1238	0.457	1.000	0.956	100	1008.784	226.351	135.000	0.676	1.000	1.000	1.000
1239	2.283	0.572	3.022	100	1093.243	227.027	153.435	1.814	2.165	0.462	0.588
1240	0.913	0.785	1.911	100	1098.649	227.703	45.000	0.956	2.646	0.378	0.667
1241	12.783	0.455	7.704	100	40.541	233.108	52.125	3.518	2.470	0.405	0.667
1242	1.370	0.967	2.137	100	77.027	227.027	161.565	0.676	3.000	0.333	1.000
1243	0.913	1.000	1.511	100	113.514	227.027	153.435	0.676	2.000	0.500	1.000
1244	0.457	1.000	0.956	100	189.189	227.027	135.000	0.676	1.000	1.000	1.000
1245	0.457	1.000	0.956	100	486.486	227.027	135.000	0.676	1.000	1.000	1.000
1246	0.457	1.000	0.956	100	929.730	227.027	135.000	0.676	1.000	1.000	1.000
1247	1.370	0.967	2.137	100	1104.730	227.027	161.565	0.676	3.000	0.333	1.000
1248	0.457	1.000	0.956	100	137.162	227.703	135.000	0.676	1.000	1.000	1.000
1249	1.826	1.000	1.911	100	59.459	228.378	135.000	1.351	1.000	1.000	1.000
1250	3.196	0.515	4.110	100	68.919	229.054	170.538	1.351	3.579	0.279	0.737
1251	0.457	1.000	0.956	100	600.000	228.378	135.000	0.676	1.000	1.000	1.000
1252	140.157	0.140	22.133	97.068	683.108	228.378	102.339	18.001	1.197	0.835	0.538
1253	0.913	1.000	1.511	100	886.486	228.378	116.565	0.676	2.000	0.500	1.000
1254	1.370	1.000	1.911	100	1063.514	229.730	45.000	1.351	1.464	0.683	0.857
1255	0.457	1.000	0.956	100	1091.892	228.378	135.000	0.676	1.000	1.000	1.000
1256	0.457	1.000	0.956	100	540.541	229.054	135.000	0.676	1.000	1.000	1.000
1257	3.196	1.000	2.867	100	1121.622	231.081	45.000	1.911	1.596	0.626	0.875
1258	0.457	1.000	0.956	100	145.946	229.730	135.000	0.676	1.000	1.000	1.000
1259	0.913	1.000	1.511	100	196.622	229.730	153.435	0.676	2.000	0.500	1.000
1260	53.415	0.470	12.404	100	509.459	239.865	29.358	9.943	1.096	0.913	0.699
1261	0.913	1.000	1.511	100	1092.568	229.730	116.565	0.676	2.000	0.500	1.000
1262	1.370	1.000	1.911	100	60.135	230.405	135.000	1.351	1.464	0.683	0.857
1263	1.826	0.611	3.022	100	68.243	230.405	153.435	1.284	3.093	0.323	0.667
1264	0.457	1.000	0.956	100	281.081	230.405	135.000	0.676	1.000	1.000	1.000
1265	0.913	1.000	1.511	100	605.405	230.405	153.435	0.676	2.000	0.500	1.000
1266	0.913	1.000	1.511	100	1094.595	231.081	153.435	0.676	2.000	0.500	1.000
1267	0.913	1.000	1.511	100	66.892	231.757	153.435	0.676	2.000	0.500	1.000
1268	0.913	1.000	1.511	100	146.622	231.757	153.435	0.676	2.000	0.500	1.000
1269	0.457	1.000	0.956	100	197.973	231.757	135.000	0.676	1.000	1.000	1.000
1270	0.913	1.000	1.511	100	613.514	231.757	153.435	0.676	2.000	0.500	1.000
1271	0.913	1.000	1.511	100	710.135	231.757	153.435	0.676	2.000	0.500	1.000
1272	0.913	1.000	1.511	100	59.459	232.432	116.565	0.676	2.000	0.500	1.000
1273	0.913	1.000	1.511	100	366.892	232.432	153.435	0.676	2.000	0.500	1.000
1274	1.370	0.967	2.137	100	396.622	232.432	161.565	0.676	3.000	0.333	1.000
1275	0.457	1.000	0.956	100	506.081	232.432	135.000	0.676	1.000	1.000	1.000
1276	0.457	1.000	0.956	100	549.324	232.432	135.000	0.676	1.000	1.000	1.000
1277	0.913	1.000	1.511	100	615.541	232.432	153.435	0.676	2.000	0.500	1.000
1278	34.240	0.378	12.909	100	619.595	234.459	6.009	6.757	2.419	0.413	0.598
1279	6.848	0.476	6.229	100	635.811	234.459	12.529	2.027	3.668	0.273	0.750
1280	257.487	0.207	33.355	98.404	693.243	237.162	173.019	17.568	1.961	0.510	0.616
1281	4.109	1.000	3.378	100	729.054	232.432	143.130	2.027	1.542	0.648	0.857
1282	0.457	1.000	0.956	100	1066.216	232.432	135.000	0.676	1.000	1.000	1.000
1283	21.001	0.315	10.135	100	1066.216	240.541	53.130	5.279	2.331	0.429	0.535
1284	0.457	1.000	0.956	100	1086.486	232.432	135.000	0.676	1.000	1.000	1.000
1285	0.457	1.000	0.956	100	1100.000	232.432	135.000	0.676	1.000	1.000	1.000
1286	0.457	1.000	0.956	100	1110.135	232.432	135.000	0.676	1.000	1.000	1.000
1287	0.457	1.000	0.956	100	618.243	233.108	135.000	0.676	1.000	1.000	1.000
1288	1.370	1.000	1.911	100	659.459	233.108	135.000	1.351	1.464	0.683	0.857
1289	0.457	1.000	0.956	100	142.568	233.784	135.000	0.676	1.000	1.000	1.000
1290	1.370	0.967	2.137	100	521.622	233.784	161.565	0.676	3.000	0.333	1.000
1291	0.913	1.000	1.511	100	958.108	233.784	116.565	0.676	2.000	0.500	1.000
1292	10.500	0.434	5.773	100	150.000	235.811	159.444	4.122	1.419	0.705	0.622
1293	7.761	0.486	5.572	100	170.270	237.838	14.036	3.335	1.507	0.664	0.607
1294	37.436	0.279	12.422	96.341	204.054	234.459	135.000	7.126	1.959	0.510	0.641
1295	21.001	0.705	7.704	100	311.486	237.838	15.255	5.256	1.309	0.764	0.773
1296	164.810	0.259	34.519	100	624.324	243.243	3.366	10.070	3.677	0.272	0.683
1297	0.457	1.000	0.956	100	648.649	234.459	135.000	0.676	1.000	1.000	1.000
1298	0.913	1.000	1.511	100	654.054	234.459	153.435	0.676	2.000	0.500	1.000
1299	41.545	0.592	13.514	100	764.865	235.135	143.130	5.177	3.151	0.317	0.802
1300	7.305	0.611	5.277	100	1026.351	237.838	39.806	3.053	2.017	0.496	0.681
1301	1.370	1.000	1.911	100	1102.703	234.459	135.000	1.351	1.464	0.683	0.857
1302	0.913	1.000	1.511	100	266.892	235.135	153.435	0.676	2.000	0.500	1.000
1303	0.457	1.000	0.956	100	466.892	235.135	135.000	0.676	1.000	1.000	1.000
1304	4.565	0.368	4.110	100	656.757	235.811	170.538	2.027	1.638	0.611	0.667
1305	5.022	0.448	5.812	100	1104.730	235.811	144.462	2.031	4.479	0.223	0.579
1306	0.457	1.000	0.956	100	200.000	236.486	135.000	0.676	1.000	1.000	1.000
1307	2.283	0.764	3.022	100	275.676	236.486	153.435	1.351	2.610	0.383	0.769
1308	1.370	0.967	2.137	100	328.378	236.486	161.565	0.676	3.000	0.333	1.000
1309	0.457	1.000	0.956	100	335.135	236.486	135.000	0.676	1.000	1.000	1.000
1310	1.826	1.000	2.436	100	654.054	237.838	33.690	1.351	2.000	0.500	0.800
1311	0.913	1.000	1.511	100	945.270	236.486	116.565	0.676	2.000	0.500	1.000
1312	0.913	1.000	1.511	100	964.865	236.486	153.435	0.676	2.000	0.500	1.000
1313	0.457	1.000	0.956	100	40.541	237.162	135.000	0.676	1.000	1.000	1.000
1314	3.652	0.710	3.639	100	157.432	238.514	21.801	2.027	2.135	0.468	0.727
1315	0.457	1.000	0.956	100	269.595	237.162	135.000	0.676	1.000	1.000	1.000
1316	0.457	1.000	0.956	100	327.027	237.162	135.000	0.676	1.000	1.000	1.000
1317	1.370	0.967	2.137	100	337.838	237.162	161.565	0.676	3.000	0.333	1.000
1318	0.913	1.000	1.511	100	500.676	237.162	153.435	0.676	2.000	0.500	1.000
1319	0.913	1.000	1.511	100	1112.162	237.162	153.435	0.676	2.000	0.500	1.000
1320	0.457	1.000	0.956	100	1124.324	237.162	135.000	0.676	1.000	1.000	1.000
1321	2.739	0.916	2.786	100	231.757	237.838	165.964	1.351	1.809	0.553	0.857
1322	0.913	1.000	1.511	100	433.108	237.838	153.435	0.676	2.000	0.500	1.000
1323	0.457	1.000	0.956	100	718.919	237.838	135.000	0.676	1.000	1.000	1.000
1324	0.457	1.000	0.956	100	745.946	237.838	135.000	0.676	1.000	1.000	1.000
1325	4.109	0.388	5.572	100	162.162	238.514	165.964	1.351	5.332	0.188	0.720
1326	0.457	1.000	0.956	100	172.973	238.514	135.000	0.676	1.000	1.000	1.000
1327	0.913	0.785	1.911	100	177.703	238.514	135.000	0.956	2.646	0.378	0.667
1328	4.565	1.000	3.378	100	272.973	238.514	143.130	2.027	1.559	0.641	0.909
1329	52.045	0.185	19.039	100	335.135	238.514	152.526	7.996	2.631	0.380	0.530
1330	141.070	0.144	33.608	91.262	484.459	267.568	59.826	10.047	3.874	0.258	0.536
1331	0.457	1.000	0.956	100	589.189	238.514	135.000	0.676	1.000	1.000	1.000
1332	14.609	0.347	8.466	100	962.162	243.919	28.610	4.300	2.079	0.481	0.598
1333	0.913	1.000	1.511	100	276.351	239.189	153.435	0.676	2.000	0.500	1.000
1334	1.370	1.000	1.911	100	318.919	239.189	135.000	1.351	1.464	0.683	0.857
1335	0.913	1.000	1.511	100	956.757	239.189	153.435	0.676	2.000	0.500	1.000
1336	0.457	1.000	0.956	100	1012.838	239.189	135.000	0.676	1.000	1.000	1.000
1337	1.370	0.967	2.137	100	162.162	240.541	161.565	0.676	3.000	0.333	1.000
1338	11.870	0.240	8.547	100	502.703	243.243	18.435	3.526	3.021	0.331	0.468
1339	0.457	1.000	0.956	100	589.189	240.541	135.000	0.676	1.000	1.000	1.000
1340	1.370	1.000	1.911	100	928.378	240.541	135.000	1.351	1.464	0.683	0.857
1341	0.457	1.000	0.956	100	64.865	241.216	135.000	0.676	1.000	1.000	1.000
1342	1.370	0.967	2.137	100	406.081	241.892	161.565	0.676	3.000	0.333	1.000
1343	0.913	1.000	1.511	100	875.676	241.892	153.435	0.676	2.000	0.500	1.000
1344	0.457	1.000	0.956	100	962.162	241.892	135.000	0.676	1.000	1.000	1.000
1345	2.283	1.000	2.436	100	1010.811	241.892	146.310	1.351	1.553	0.644	0.909
1346	21.914	0.422	10.489	100	1064.189	252.027	75.069	4.054	2.159	0.463	0.686
1347	0.913	1.000	1.511	100	928.378	242.568	153.435	0.676	2.000	0.500	1.000
1348	0.913	1.000	1.511	100	64.865	243.243	116.565	0.676	2.000	0.500	1.000
1349	0.457	1.000	0.956	100	324.324	243.243	135.000	0.676	1.000	1.000	1.000
1350	3.196	0.434	4.778	100	404.730	243.243	171.870	0.676	7.000	0.143	1.000
1351	0.457	1.000	0.956	100	445.270	243.243	135.000	0.676	1.000	1.000	1.000
1352	1.826	0.740	2.786	100	475.676	243.243	165.964	0.676	4.000	0.250	1.000
1353	4.565	0.887	3.940	100	454.054	244.595	149.036	1.925	2.510	0.398	0.800
1354	0.913	1.000	1.511	100	691.892	244.595	116.565	0.676	2.000	0.500	1.000
1355	1.370	1.000	1.911	100	772.973	245.946	45.000	1.351	1.464	0.683	0.857
1356	0.913	1.000	1.511	100	66.216	245.270	153.435	0.676	2.000	0.500	1.000
1357	0.457	1.000	0.956	100	297.297	245.270	135.000	0.676	1.000	1.000	1.000
1358	0.913	1.000	1.511	100	508.108	245.270	153.435	0.676	2.000	0.500	1.000
1359	0.457	1.000	0.956	100	876.351	245.270	135.000	0.676	1.000	1.000	1.000
1360	0.913	1.000	1.511	100	394.595	245.946	153.435	0.676	2.000	0.500	1.000
1361	0.457	1.000	0.956	100	1010.135	245.946	135.000	0.676	1.000	1.000	1.000
1362	2.283	1.000	2.436	100	58.784	247.973	33.690	1.351	1.553	0.644	0.909
1363	1.370	0.967	2.137	100	62.162	246.622	161.565	0.676	3.000	0.333	1.000
1364	8.218	0.868	4.872	100	775.676	247.297	146.310	2.867	1.819	0.550	0.800
1365	14.153	0.366	7.909	100	929.730	246.622	109.983	4.054	2.171	0.461	0.564
1366	9.587	0.568	6.229	100	1012.162	246.622	130.601	3.344	2.006	0.498	0.724
1367	1.370	1.000	1.911	100	1091.892	247.973	45.000	1.351	1.464	0.683	0.857
1368	0.457	1.000	0.956	100	135.135	247.297	135.000	0.676	1.000	1.000	1.000
1369	1.826	0.611	3.022	100	875.676	248.649	26.565	1.284	3.093	0.323	0.667
1370	229.638	0.346	29.799	97.614	214.865	257.432	176.100	13.783	2.652	0.377	0.650
1371	4.565	0.709	4.326	100	460.135	247.973	141.340	1.911	2.553	0.392	0.741
1372	7.305	0.628	4.919	100	994.595	247.973	105.945	2.557	2.225	0.450	0.744
1373	0.457	1.000	0.956	100	59.459	248.649	135.000	0.676	1.000	1.000	1.000
1374	0.457	1.000	0.956	100	350.676	248.649	135.000	0.676	1.000	1.000	1.000
1375	0.913	1.000	1.511	100	695.270	248.649	116.565	0.676	2.000	0.500	1.000
1376	0.457	1.000	0.956	100	697.297	248.649	135.000	0.676	1.000	1.000	1.000
1377	0.913	1.000	1.511	100	1090.541	248.649	153.435	0.676	2.000	0.500	1.000
1378	0.457	1.000	0.956	100	1127.703	248.649	135.000	0.676	1.000	1.000	1.000
1379	1.826	0.539	3.022	100	1129.054	251.351	63.435	1.209	3.493	0.286	0.667
1380	0.457	1.000	0.956	100	347.297	249.324	135.000	0.676	1.000	1.000	1.000
1381	0.457	1.000	0.956	100	448.649	249.324	135.000	0.676	1.000	1.000	1.000
1382	1.826	0.698	2.436	100	712.162	251.351	33.690	1.351	1.637	0.611	0.727
1383	0.457	1.000	0.956	100	855.405	250.000	135.000	0.676	1.000	1.000	1.000
1384	1.370	0.643	2.436	100	166.892	250.676	123.690	1.209	2.702	0.370	0.667
1385	0.457	1.000	0.956	100	362.162	250.676	135.000	0.676	1.000	1.000	1.000
1386	2.739	0.916	2.786	100	465.541	251.351	165.964	1.351	1.809	0.553	0.857
1387	0.913	1.000	1.511	100	959.459	250.676	116.565	0.676	2.000	0.500	1.000
1388	28.305	0.555	10.135	100	499.324	259.459	53.130	5.217	2.053	0.487	0.747
1389	1.826	1.000	1.911	100	906.757	251.351	135.000	1.351	1.000	1.000	1.000
1390	3.652	0.914	3.378	100	1077.027	254.054	53.130	1.911	1.939	0.516	0.842
1391	2.283	1.000	2.436	100	1126.351	252.703	33.690	1.351	1.553	0.644	0.909
1392	0.457	1.000	0.956	100	331.081	252.027	135.000	0.676	1.000	1.000	1.000
1393	15.522	0.770	6.229	100	418.919	254.730	12.529	4.054	1.424	0.702	0.810
1394	9.587	0.379	6.229	100	438.514	255.405	12.529	3.378	1.718	0.582	0.636
1395	8.218	0.706	5.146	100	469.595	252.027	156.801	2.668	2.067	0.484	0.783
1396	0.457	1.000	0.956	100	855.405	252.027	135.000	0.676	1.000	1.000	1.000
1397	4.109	0.585	3.940	100	864.865	254.730	30.964	2.351	2.066	0.484	0.667
1398	0.913	1.000	1.511	100	1006.757	252.027	153.435	0.676	2.000	0.500	1.000
1399	0.457	1.000	0.956	100	104.054	252.703	135.000	0.676	1.000	1.000	1.000
1400	13.696	0.442	6.957	100	1013.514	258.784	60.945	4.445	1.727	0.579	0.632
1401	0.457	1.000	0.956	100	990.541	253.378	135.000	0.676	1.000	1.000	1.000
1402	0.457	1.000	0.956	100	1010.811	253.378	135.000	0.676	1.000	1.000	1.000
1403	0.913	1.000	1.511	100	1124.324	253.378	116.565	0.676	2.000	0.500	1.000
1404	0.457	1.000	0.956	100	415.541	254.054	135.000	0.676	1.000	1.000	1.000
1405	0.913	1.000	1.511	100	475.676	254.054	116.565	0.676	2.000	0.500	1.000
1406	0.457	1.000	0.956	100	493.919	254.054	135.000	0.676	1.000	1.000	1.000
1407	0.457	1.000	0.956	100	805.405	254.054	135.000	0.676	1.000	1.000	1.000
1408	0.457	1.000	0.956	100	987.162	254.054	135.000	0.676	1.000	1.000	1.000
1409	0.457	1.000	0.956	100	995.946	254.054	135.000	0.676	1.000	1.000	1.000
1410	2.739	0.686	2.786	100	1063.514	254.054	104.036	2.027	1.528	0.655	0.667
1411	0.457	1.000	0.956	100	1118.919	254.054	135.000	0.676	1.000	1.000	1.000
1412	0.457	1.000	0.956	100	286.486	254.730	135.000	0.676	1.000	1.000	1.000
1413	18.718	0.260	13.681	100	356.081	255.405	147.095	3.617	4.937	0.203	0.522
1414	17.348	0.351	9.838	100	404.054	258.784	15.945	3.290	4.029	0.248	0.603
1415	0.457	1.000	0.956	100	847.973	254.730	135.000	0.676	1.000	1.000	1.000
1416	31.045	0.324	14.617	100	922.973	266.892	56.310	5.137	3.441	0.291	0.557
1417	0.457	1.000	0.956	100	956.757	254.730	135.000	0.676	1.000	1.000	1.000
1418	192.659	0.149	34.453	100	240.541	272.973	25.560	13.082	3.224	0.310	0.530
1419	5.935	0.438	5.572	100	432.432	256.757	14.036	2.351	3.198	0.313	0.634
1420	0.457	1.000	0.956	100	454.054	255.405	135.000	0.676	1.000	1.000	1.000
1421	5.022	0.976	3.378	100	603.378	258.108	36.870	2.389	1.450	0.689	0.846
1422	1.826	0.857	2.436	100	994.595	255.405	146.310	1.351	2.000	0.500	0.800
1423	5.022	0.589	4.872	100	1066.216	255.405	146.310	2.351	2.388	0.419	0.710
1424	0.457	1.000	0.956	100	1069.595	255.405	135.000	0.676	1.000	1.000	1.000
1425	1.826	0.740	2.786	100	1119.595	255.405	165.964	0.676	4.000	0.250	1.000
1426	0.457	1.000	0.956	100	158.108	256.757	135.000	0.676	1.000	1.000	1.000
1427	0.457	1.000	0.956	100	286.486	256.757	135.000	0.676	1.000	1.000	1.000
1428	0.913	1.000	1.511	100	297.973	256.757	153.435	0.676	2.000	0.500	1.000
1429	6.848	0.588	5.773	100	387.838	258.784	20.556	1.967	3.746	0.267	0.789
1430	14.609	0.616	7.554	96.875	777.027	256.757	153.435	3.861	1.969	0.508	0.780
1431	0.913	1.000	1.511	100	850.000	256.757	153.435	0.676	2.000	0.500	1.000
1432	1.370	0.967	2.137	100	956.757	256.757	161.565	0.676	3.000	0.333	1.000
1433	4.109	0.539	4.533	100	985.811	260.811	63.435	1.710	3.406	0.294	0.720
1434	3.196	0.718	3.639	100	1116.892	258.108	21.801	1.351	2.731	0.366	0.824
1435	2.283	0.873	2.867	100	1133.108	258.784	45.000	1.513	2.188	0.457	0.714
1436	0.457	1.000	0.956	100	437.838	257.432	135.000	0.676	1.000	1.000	1.000
1437	15.522	0.241	12.997	100	579.730	270.270	81.027	2.473	6.479	0.154	0.648
1438	0.457	1.000	0.956	100	995.946	257.432	135.000	0.676	1.000	1.000	1.000
1439	0.913	1.000	1.511	100	456.757	258.108	116.565	0.676	2.000	0.500	1.000
1440	0.913	1.000	1.511	100	1010.811	258.108	153.435	0.676	2.000	0.500	1.000
1441	3.196	0.621	3.378	100	1113.514	260.135	36.870	2.027	1.646	0.608	0.737
1442	0.457	1.000	0.956	100	213.514	258.784	135.000	0.676	1.000	1.000	1.000
1443	1.826	0.611	3.022	100	397.973	260.135	26.565	1.209	3.493	0.286	0.667
1444	5.022	0.637	4.533	100	585.135	259.459	153.435	2.116	2.961	0.338	0.667
1445	0.457	1.000	0.956	100	620.946	258.784	135.000	0.676	1.000	1.000	1.000
1446	0.457	1.000	0.956	100	900.000	258.784	135.000	0.676	1.000	1.000	1.000
1447	0.457	1.000	0.956	100	208.784	259.459	135.000	0.676	1.000	1.000	1.000
1448	768.353	0.227	72.032	98.693	771.622	302.703	36.225	23.290	4.518	0.221	0.635
1449	5.935	0.846	4.273	100	1010.811	259.459	161.565	2.027	1.865	0.536	0.867
1450	0.913	1.000	1.511	100	748.649	260.135	153.435	0.676	2.000	0.500	1.000
1451	1.370	1.000	1.911	100	1108.108	261.486	45.000	1.351	1.464	0.683	0.857
1452	0.913	1.000	1.511	100	167.568	260.811	153.435	0.676	2.000	0.500	1.000
1453	1.370	1.000	1.911	100	207.432	262.162	45.000	1.351	1.464	0.683	0.857
1454	0.913	1.000	1.511	100	291.892	260.811	153.435	0.676	2.000	0.500	1.000
1455	8.674	0.322	6.757	100	397.297	260.811	126.870	3.441	2.321	0.431	0.535
1456	1.370	0.967	2.137	100	430.405	260.811	161.565	0.676	3.000	0.333	1.000
1457	5.478	0.430	4.872	100	452.703	260.811	146.310	2.703	1.990	0.503	0.686
1458	0.457	1.000	0.956	100	750.676	260.811	135.000	0.676	1.000	1.000	1.000
1459	171.202	0.165	39.317	98.667	15.541	262.838	160.942	9.419	4.763	0.210	0.612
1460	1.370	0.643	2.436	100	956.757	263.514	56.310	1.209	2.702	0.370	0.667
1461	0.913	0.785	1.911	100	166.892	263.514	45.000	0.956	2.646	0.378	0.667
1462	1.370	1.000	1.911	100	254.054	262.162	135.000	1.351	1.464	0.683	0.857
1463	0.913	1.000	1.511	100	427.027	262.162	116.565	0.676	2.000	0.500	1.000
1464	0.457	1.000	0.956	100	594.595	262.162	135.000	0.676	1.000	1.000	1.000
1465	5.022	0.659	4.273	100	1012.162	262.838	108.435	2.027	2.127	0.470	0.786
1466	3.652	1.000	3.022	100	110.811	263.514	116.565	1.351	2.000	0.500	1.000
1467	1.826	1.000	1.911	100	205.405	263.514	135.000	1.351	1.000	1.000	1.000
1468	15.522	0.733	5.812	97.059	420.946	264.865	144.462	4.668	1.299	0.770	0.819
1469	21.001	0.392	9.976	100	924.324	268.243	28.301	5.395	1.886	0.530	0.605
1470	2.739	0.916	2.867	100	1070.946	263.514	135.000	1.911	1.593	0.628	0.857
1471	0.913	1.000	1.511	100	1074.324	263.514	153.435	0.676	2.000	0.500	1.000
1472	0.913	1.000	1.511	100	491.892	264.189	153.435	0.676	2.000	0.500	1.000
1473	16.435	0.518	8.887	100	517.568	264.865	171.254	2.703	3.422	0.292	0.809
1474	10.500	0.277	9.190	100	199.324	272.297	53.973	3.417	3.732	0.268	0.495
1475	0.457	1.000	0.956	100	534.459	264.865	135.000	0.676	1.000	1.000	1.000
1476	0.457	1.000	0.956	100	594.595	264.865	135.000	0.676	1.000	1.000	1.000
1477	0.457	1.000	0.956	100	652.027	264.865	135.000	0.676	1.000	1.000	1.000
1478	16.892	0.798	6.957	100	491.892	265.541	150.945	3.457	2.147	0.466	0.841
1479	1.826	0.645	2.786	100	956.757	265.541	104.036	0.676	4.000	0.250	1.000
1480	0.457	1.000	0.956	100	172.973	266.216	135.000	0.676	1.000	1.000	1.000
1481	2.283	0.599	3.445	100	527.027	266.216	168.690	0.676	5.000	0.200	1.000
1482	0.457	1.000	0.956	100	583.784	266.216	135.000	0.676	1.000	1.000	1.000
1483	0.913	1.000	1.511	100	1140.541	266.216	116.565	0.676	2.000	0.500	1.000
1484	3.652	0.914	3.022	100	399.324	266.892	116.565	2.027	1.554	0.644	0.800
1485	0.457	1.000	0.956	100	610.811	266.892	135.000	0.676	1.000	1.000	1.000
1486	0.913	1.000	1.511	100	112.838	267.568	116.565	0.676	2.000	0.500	1.000
1487	0.457	1.000	0.956	100	648.649	267.568	135.000	0.676	1.000	1.000	1.000
1488	0.457	1.000	0.956	100	282.432	268.243	135.000	0.676	1.000	1.000	1.000
1489	0.457	1.000	0.956	100	875.676	268.243	135.000	0.676	1.000	1.000	1.000
1490	0.913	1.000	1.511	100	1002.027	268.243	153.435	0.676	2.000	0.500	1.000
1491	0.457	1.000	0.956	100	1014.189	268.243	135.000	0.676	1.000	1.000	1.000
1492	0.913	1.000	1.511	100	370.946	268.919	116.565	0.676	2.000	0.500	1.000
1493	62.546	0.301	19.699	89.781	425.676	268.919	174.094	6.705	3.339	0.300	0.624
1494	3.196	0.472	4.273	100	535.135	268.919	161.565	1.351	4.378	0.228	0.737
1495	0.457	1.000	0.956	100	783.784	268.919	135.000	0.676	1.000	1.000	1.000
1496	4.565	0.736	4.273	100	952.027	270.270	18.435	1.351	2.795	0.358	0.909
1497	1.826	1.000	1.911	100	1072.973	268.919	135.000	1.351	1.000	1.000	1.000
1498	1.370	0.967	2.137	100	607.432	269.595	161.565	0.676	3.000	0.333	1.000
1499	1.370	1.000	1.911	100	1129.730	270.946	45.000	1.351	1.464	0.683	0.857
1500	1.370	0.967	2.137	100	16.216	270.270	161.565	0.676	3.000	0.333	1.000
1501	0.457	1.000	0.956	100	148.649	270.270	135.000	0.676	1.000	1.000	1.000
1502	0.457	1.000	0.956	100	178.378	270.270	135.000	0.676	1.000	1.000	1.000
1503	0.457	1.000	0.956	100	186.486	270.270	135.000	0.676	1.000	1.000	1.000
1504	2.283	0.572	3.022	100	216.892	272.973	63.435	1.351	2.422	0.413	0.714
1505	4.109	0.482	4.872	100	285.811	270.270	146.310	2.116	3.126	0.320	0.562
1506	0.457	1.000	0.956	100	321.622	270.270	135.000	0.676	1.000	1.000	1.000
1507	6.848	0.674	4.533	100	495.946	270.270	116.565	2.653	1.735	0.576	0.750
1508	0.913	1.000	1.511	100	540.541	270.270	153.435	0.676	2.000	0.500	1.000
1509	0.913	1.000	1.511	100	547.973	270.270	116.565	0.676	2.000	0.500	1.000
1510	0.457	1.000	0.956	100	604.730	270.270	135.000	0.676	1.000	1.000	1.000
1511	0.457	1.000	0.956	100	643.243	270.270	135.000	0.676	1.000	1.000	1.000
1512	0.457	1.000	0.956	100	729.730	270.270	135.000	0.676	1.000	1.000	1.000
1513	1.370	0.809	2.137	100	1097.297	270.270	108.435	0.676	3.000	0.333	1.000
1514	0.457	1.000	0.956	100	1113.514	270.270	135.000	0.676	1.000	1.000	1.000
1515	1.370	0.754	2.436	100	18.919	270.946	146.310	1.209	2.702	0.370	0.667
1516	0.913	1.000	1.511	100	1131.757	270.946	116.565	0.676	2.000	0.500	1.000
1517	0.457	1.000	0.956	100	10.135	271.622	135.000	0.676	1.000	1.000	1.000
1518	0.913	1.000	1.511	100	13.514	271.622	153.435	0.676	2.000	0.500	1.000
1519	0.913	1.000	1.511	100	540.541	271.622	153.435	0.676	2.000	0.500	1.000
1520	0.913	1.000	1.511	100	579.730	271.622	153.435	0.676	2.000	0.500	1.000
1521	0.457	1.000	0.956	100	912.838	271.622	135.000	0.676	1.000	1.000	1.000
1522	0.457	1.000	0.956	100	1014.189	271.622	135.000	0.676	1.000	1.000	1.000
1523	1.370	1.000	1.911	100	186.486	272.297	135.000	1.351	1.464	0.683	0.857
1524	2.283	0.572	3.022	100	916.892	273.649	26.565	1.351	2.422	0.413	0.714
1525	3.196	0.800	3.022	100	147.297	272.973	116.565	1.351	2.123	0.471	0.875
1526	1.370	0.754	2.436	100	539.865	272.973	146.310	1.209	2.702	0.370	0.667
1527	47.936	0.413	14.205	92.381	910.135	275.000	154.654	7.213	2.459	0.407	0.686
1528	4.565	0.292	6.655	100	1129.730	272.973	156.038	1.496	6.851	0.146	0.556
1529	5.935	0.466	4.919	100	499.324	275.000	164.055	2.720	2.337	0.428	0.565
1530	0.913	1.000	1.511	100	572.973	273.649	116.565	0.676	2.000	0.500	1.000
1531	2.739	0.484	3.940	100	1093.919	275.676	30.964	1.513	3.584	0.279	0.600
1532	1.370	1.000	1.911	100	281.081	275.676	45.000	1.351	1.464	0.683	0.857
1533	1.370	1.000	1.911	100	737.162	274.324	135.000	1.351	1.464	0.683	0.857
1534	1.370	0.967	2.137	100	1012.838	274.324	161.565	0.676	3.000	0.333	1.000
1535	1.370	0.967	2.137	100	58.108	275.000	161.565	0.676	3.000	0.333	1.000
1536	0.457	1.000	0.956	100	318.919	275.000	135.000	0.676	1.000	1.000	1.000
1537	0.457	1.000	0.956	100	540.541	275.000	135.000	0.676	1.000	1.000	1.000
1538	0.457	1.000	0.956	100	648.649	275.000	135.000	0.676	1.000	1.000	1.000
1539	0.913	1.000	1.511	100	695.946	275.000	153.435	0.676	2.000	0.500	1.000
1540	0.457	1.000	0.956	100	970.946	275.000	135.000	0.676	1.000	1.000	1.000
1541	13.696	0.830	5.447	100	981.757	279.730	60.255	4.054	1.065	0.939	0.833
1542	2.739	0.916	2.867	100	259.459	277.703	45.000	1.911	1.593	0.628	0.857
1543	3.652	1.000	3.378	100	275.000	277.703	36.870	1.911	1.939	0.516	0.842
1544	0.457	1.000	0.956	100	556.757	275.676	135.000	0.676	1.000	1.000	1.000
1545	1.370	0.967	2.137	100	1107.432	275.676	161.565	0.676	3.000	0.333	1.000
1546	11.870	0.242	11.566	100	1111.486	277.027	6.710	1.968	6.976	0.143	0.675
1547	0.457	1.000	0.956	100	64.189	276.351	135.000	0.676	1.000	1.000	1.000
1548	0.457	1.000	0.956	100	986.486	276.351	135.000	0.676	1.000	1.000	1.000
1549	0.913	1.000	1.511	100	1014.865	276.351	153.435	0.676	2.000	0.500	1.000
1550	1.370	0.967	2.137	100	635.811	277.027	161.565	0.676	3.000	0.333	1.000
1551	5.478	0.695	3.639	100	777.703	277.027	111.801	2.565	1.628	0.614	0.727
1552	0.913	1.000	1.511	100	840.541	277.027	153.435	0.676	2.000	0.500	1.000
1553	37.893	0.217	14.460	100	859.459	278.378	142.595	9.078	1.922	0.520	0.436
1554	1.370	0.967	2.137	100	1091.892	277.027	161.565	0.676	3.000	0.333	1.000
1555	3.652	0.785	3.822	100	1104.054	279.730	45.000	1.876	2.677	0.374	0.727
1556	1.370	0.967	2.137	100	1108.108	277.027	161.565	0.676	3.000	0.333	1.000
1557	0.457	1.000	0.956	100	119.595	277.703	135.000	0.676	1.000	1.000	1.000
1558	0.457	1.000	0.956	100	383.784	277.703	135.000	0.676	1.000	1.000	1.000
1559	0.457	1.000	0.956	100	658.784	277.703	135.000	0.676	1.000	1.000	1.000
1560	1.370	1.000	1.911	100	743.243	277.703	135.000	1.351	1.464	0.683	0.857
1561	4.109	1.000	2.867	88.889	468.919	278.378	135.000	2.027	1.000	1.000	1.000
1562	0.913	1.000	1.511	100	550.000	278.378	153.435	0.676	2.000	0.500	1.000
1563	62.546	0.094	31.432	97.810	933.784	278.378	154.537	4.879	8.875	0.113	0.493
1564	0.457	1.000	0.956	100	75.676	279.054	135.000	0.676	1.000	1.000	1.000
1565	2.283	0.873	2.867	100	421.622	281.081	45.000	1.513	2.188	0.457	0.714
1566	0.457	1.000	0.956	100	697.297	279.054	135.000	0.676	1.000	1.000	1.000
1567	0.913	1.000	1.511	100	896.622	279.054	153.435	0.676	2.000	0.500	1.000
1568	0.457	1.000	0.956	100	275.676	279.730	135.000	0.676	1.000	1.000	1.000
1569	5.022	0.976	3.639	100	401.351	281.757	21.801	2.027	1.714	0.583	0.846
1570	4.565	0.650	4.326	100	487.838	279.730	141.340	2.254	2.196	0.455	0.690
1571	0.457	1.000	0.956	100	845.946	279.730	135.000	0.676	1.000	1.000	1.000
1572	1.826	1.000	1.911	100	955.405	279.730	135.000	1.351	1.000	1.000	1.000
1573	1.370	1.000	1.911	100	1102.703	279.730	135.000	1.351	1.464	0.683	0.857
1574	1.826	0.740	2.786	100	75.676	280.405	165.964	0.676	4.000	0.250	1.000
1575	6.392	0.230	8.887	100	405.405	280.405	171.254	1.351	10.541	0.095	0.700
1576	0.913	1.000	1.511	100	745.946	280.405	153.435	0.676	2.000	0.500	1.000
1577	0.913	1.000	1.511	100	1077.703	280.405	153.435	0.676	2.000	0.500	1.000
1578	3.652	0.588	4.110	100	79.054	281.081	170.538	1.351	3.152	0.317	0.800
1579	5.478	0.967	3.822	100	508.108	281.081	135.000	2.703	1.575	0.635	0.857
1580	0.913	1.000	1.511	100	644.595	281.081	153.435	0.676	2.000	0.500	1.000
1581	0.457	1.000	0.956	100	662.838	281.081	135.000	0.676	1.000	1.000	1.000
1582	1.370	0.967	2.137	100	697.297	281.081	161.565	0.676	3.000	0.333	1.000
1583	0.913	1.000	1.511	100	747.973	281.081	153.435	0.676	2.000	0.500	1.000
1584	5.935	0.427	5.733	100	1094.595	285.135	45.000	2.389	3.318	0.301	0.578
1585	0.457	1.000	0.956	100	86.486	281.757	135.000	0.676	1.000	1.000	1.000
1586	1.370	1.000	1.911	100	327.703	283.108	45.000	1.351	1.464	0.683	0.857
1587	4.565	0.553	4.778	100	414.865	281.757	171.870	1.351	3.445	0.290	0.833
1588	2.739	0.532	3.940	100	470.270	281.757	149.036	1.500	3.827	0.261	0.632
1589	0.457	1.000	0.956	100	664.865	282.432	135.000	0.676	1.000	1.000	1.000
1590	0.457	1.000	0.956	100	110.811	283.108	135.000	0.676	1.000	1.000	1.000
1591	0.457	1.000	0.956	100	1064.189	283.108	135.000	0.676	1.000	1.000	1.000
1592	0.457	1.000	0.956	100	943.919	283.784	135.000	0.676	1.000	1.000	1.000
1593	41.088	0.171	25.073	100	296.622	290.541	14.036	3.534	10.469	0.096	0.564
1594	0.457	1.000	0.956	100	504.730	284.459	135.000	0.676	1.000	1.000	1.000
1595	3.196	0.800	3.378	100	597.297	286.486	36.870	1.925	1.835	0.545	0.737
1596	0.457	1.000	0.956	100	903.378	284.459	135.000	0.676	1.000	1.000	1.000
1597	0.457	1.000	0.956	100	1077.027	284.459	135.000	0.676	1.000	1.000	1.000
1598	0.457	1.000	0.956	100	232.432	285.135	135.000	0.676	1.000	1.000	1.000
1599	4.109	0.521	4.872	100	256.757	285.135	146.310	1.760	3.781	0.264	0.667
1600	0.913	1.000	1.511	100	353.378	285.135	153.435	0.676	2.000	0.500	1.000
1601	1.370	0.967	2.137	100	1022.973	285.135	161.565	0.676	3.000	0.333	1.000
1602	3.196	0.943	3.022	100	356.757	288.514	63.435	1.351	1.936	0.517	0.933
1603	5.022	0.853	3.639	100	593.243	287.838	21.801	2.389	1.660	0.603	0.759
1604	0.913	1.000	1.511	100	1077.027	285.811	153.435	0.676	2.000	0.500	1.000
1605	3.196	0.943	3.022	100	160.811	287.838	26.565	1.351	1.936	0.517	0.933
1606	1.370	1.000	1.911	100	172.973	287.838	45.000	1.351	1.464	0.683	0.857
1607	0.457	1.000	0.956	100	443.243	286.486	135.000	0.676	1.000	1.000	1.000
1608	0.457	1.000	0.956	100	666.892	286.486	135.000	0.676	1.000	1.000	1.000
1609	0.457	1.000	0.956	100	669.595	286.486	135.000	0.676	1.000	1.000	1.000
1610	0.913	1.000	1.511	100	702.703	286.486	153.435	0.676	2.000	0.500	1.000
1611	0.913	1.000	1.511	100	707.432	286.486	153.435	0.676	2.000	0.500	1.000
1612	1.826	0.611	2.867	100	710.135	286.486	135.000	1.433	2.530	0.395	0.615
1613	0.913	1.000	1.511	100	752.027	286.486	153.435	0.676	2.000	0.500	1.000
1614	10.957	0.425	6.957	100	1075.000	293.919	60.945	3.561	2.416	0.414	0.649
1615	1.370	1.000	1.911	100	261.486	288.514	135.000	1.351	1.464	0.683	0.857
1616	5.478	0.458	4.872	100	458.784	292.568	56.310	2.524	2.035	0.491	0.632
1617	0.457	1.000	0.956	100	954.054	288.514	135.000	0.676	1.000	1.000	1.000
1618	0.913	1.000	1.511	100	1062.162	288.514	153.435	0.676	2.000	0.500	1.000
1619	2.739	0.441	4.273	100	143.919	289.189	161.565	1.285	4.833	0.207	0.667
1620	5.022	0.809	4.273	100	151.351	290.541	18.435	1.351	2.858	0.350	0.957
1621	0.913	1.000	1.511	100	837.838	289.189	153.435	0.676	2.000	0.500	1.000
1622	0.913	1.000	1.511	100	862.162	289.189	153.435	0.676	2.000	0.500	1.000
1623	0.457	1.000	0.956	100	129.730	289.865	135.000	0.676	1.000	1.000	1.000
1624	1.370	0.967	2.137	100	189.189	289.865	161.565	0.676	3.000	0.333	1.000
1625	0.457	1.000	0.956	100	351.351	289.865	135.000	0.676	1.000	1.000	1.000
1626	5.935	0.846	3.940	100	568.919	289.865	120.964	2.703	1.389	0.720	0.812
1627	0.457	1.000	0.956	100	823.649	289.865	135.000	0.676	1.000	1.000	1.000
1628	0.457	1.000	0.956	100	897.297	289.865	135.000	0.676	1.000	1.000	1.000
1629	5.022	0.659	4.533	100	916.216	293.919	63.435	1.925	2.944	0.340	0.786
1630	0.913	1.000	1.511	100	1080.405	289.865	116.565	0.676	2.000	0.500	1.000
1631	1.370	1.000	1.911	100	478.378	290.541	135.000	1.351	1.464	0.683	0.857
1632	0.457	1.000	0.956	100	549.324	290.541	135.000	0.676	1.000	1.000	1.000
1633	0.457	1.000	0.956	100	702.703	290.541	135.000	0.676	1.000	1.000	1.000
1634	9.131	0.207	10.895	100	86.486	296.622	29.745	2.725	5.094	0.196	0.455
1635	1.370	0.967	2.137	100	127.027	291.216	161.565	0.676	3.000	0.333	1.000
1636	0.457	1.000	0.956	100	188.514	291.216	135.000	0.676	1.000	1.000	1.000
1637	0.457	1.000	0.956	100	672.973	291.216	135.000	0.676	1.000	1.000	1.000
1638	3.196	0.718	3.445	100	825.000	291.216	168.690	1.351	2.423	0.413	0.824
1639	0.457	1.000	0.956	100	1043.243	291.216	135.000	0.676	1.000	1.000	1.000
1640	0.457	1.000	0.956	100	200.000	291.892	135.000	0.676	1.000	1.000	1.000
1641	2.283	1.000	2.436	100	293.919	293.243	33.690	1.351	1.553	0.644	0.909
1642	0.457	1.000	0.956	100	627.027	291.892	135.000	0.676	1.000	1.000	1.000
1643	0.457	1.000	0.956	100	854.054	291.892	135.000	0.676	1.000	1.000	1.000
1644	1073.320	0.242	92.824	98.256	972.973	291.892	148.392	23.096	4.141	0.242	0.753
1645	0.457	1.000	0.956	100	1024.324	291.892	135.000	0.676	1.000	1.000	1.000
1646	1.370	0.967	2.137	100	1093.919	291.892	161.565	0.676	3.000	0.333	1.000
1647	0.457	1.000	0.956	100	443.243	292.568	135.000	0.676	1.000	1.000	1.000
1648	0.457	1.000	0.956	100	1043.243	292.568	135.000	0.676	1.000	1.000	1.000
1649	3.196	0.898	3.378	100	275.000	295.270	36.870	1.911	2.041	0.490	0.778
1650	1.370	0.967	2.137	100	448.649	293.243	161.565	0.676	3.000	0.333	1.000
1651	0.457	1.000	0.956	100	456.757	293.243	135.000	0.676	1.000	1.000	1.000
1652	21.914	0.168	13.864	100	562.162	304.054	43.025	5.102	3.526	0.284	0.364
1653	0.913	1.000	1.511	100	572.973	293.243	116.565	0.676	2.000	0.500	1.000
1654	0.457	1.000	0.956	100	634.459	293.243	135.000	0.676	1.000	1.000	1.000
1655	2.739	0.589	3.822	100	756.757	293.243	135.000	1.876	2.963	0.338	0.600
1656	0.913	1.000	1.511	100	1045.946	293.243	153.435	0.676	2.000	0.500	1.000
1657	0.457	1.000	0.956	100	356.081	293.919	135.000	0.676	1.000	1.000	1.000
1658	0.913	1.000	1.511	100	363.514	293.919	116.565	0.676	2.000	0.500	1.000
1659	0.457	1.000	0.956	100	551.351	293.919	135.000	0.676	1.000	1.000	1.000
1660	3.652	0.914	3.022	100	875.676	294.595	153.435	2.027	1.554	0.644	0.800
1661	0.457	1.000	0.956	100	1023.649	293.919	135.000	0.676	1.000	1.000	1.000
1662	5.935	0.427	5.277	100	454.054	297.973	39.806	2.389	3.006	0.333	0.619
1663	4.109	0.799	3.639	100	66.892	296.622	21.801	2.027	1.921	0.521	0.783
1664	0.457	1.000	0.956	100	204.054	295.270	135.000	0.676	1.000	1.000	1.000
1665	0.457	1.000	0.956	100	356.757	295.270	135.000	0.676	1.000	1.000	1.000
1666	2.283	1.000	2.436	100	448.649	296.622	33.690	1.351	1.553	0.644	0.909
1667	4.565	0.736	4.110	100	1125.676	295.270	170.538	1.351	2.686	0.372	0.909
1668	3.196	0.621	3.940	100	359.459	297.973	30.964	1.640	3.002	0.333	0.667
1669	0.457	1.000	0.956	100	167.568	296.622	135.000	0.676	1.000	1.000	1.000
1670	0.457	1.000	0.956	100	434.459	296.622	135.000	0.676	1.000	1.000	1.000
1671	1.370	0.967	2.137	100	583.108	296.622	161.565	0.676	3.000	0.333	1.000
1672	0.457	1.000	0.956	100	659.459	296.622	135.000	0.676	1.000	1.000	1.000
1673	4.565	0.408	5.447	100	195.946	300.000	29.745	2.031	4.221	0.237	0.541
1674	0.457	1.000	0.956	100	275.676	297.297	135.000	0.676	1.000	1.000	1.000
1675	0.457	1.000	0.956	100	313.514	297.297	135.000	0.676	1.000	1.000	1.000
1676	3.652	0.463	4.778	100	412.838	300.676	45.000	1.760	3.780	0.265	0.571
1677	16.892	0.119	13.049	100	432.432	302.027	21.251	4.730	3.220	0.311	0.457
1678	12.783	0.381	9.190	100	539.189	300.000	17.103	3.204	4.097	0.244	0.596
1679	4.565	0.536	4.533	100	681.081	297.297	116.565	1.886	3.082	0.324	0.645
1680	0.913	1.000	1.511	100	1145.946	297.297	116.565	0.676	2.000	0.500	1.000
1681	12.783	0.505	6.229	100	85.135	302.027	40.601	3.992	1.561	0.640	0.667
1682	0.457	1.000	0.956	100	1097.297	297.973	135.000	0.676	1.000	1.000	1.000
1683	0.457	1.000	0.956	100	1116.216	297.973	135.000	0.676	1.000	1.000	1.000
1684	0.457	1.000	0.956	100	567.568	298.649	135.000	0.676	1.000	1.000	1.000
1685	0.913	1.000	1.511	100	1122.973	298.649	153.435	0.676	2.000	0.500	1.000
1686	0.457	1.000	0.956	100	200.000	299.324	135.000	0.676	1.000	1.000	1.000
1687	0.457	1.000	0.956	100	550.676	299.324	135.000	0.676	1.000	1.000	1.000
1688	0.913	0.785	1.911	100	1075.000	300.676	45.000	0.956	2.646	0.378	0.667
1689	0.913	1.000	1.511	100	1118.919	299.324	153.435	0.676	2.000	0.500	1.000
1690	1.370	1.000	1.911	100	1129.730	300.000	135.000	1.351	1.464	0.683	0.857
1691	0.913	1.000	1.511	100	143.243	300.676	153.435	0.676	2.000	0.500	1.000
1692	2.283	0.873	2.867	100	185.811	302.703	45.000	1.433	2.308	0.433	0.769
1693	0.457	1.000	0.956	100	275.000	300.676	135.000	0.676	1.000	1.000	1.000
1694	0.913	1.000	1.511	100	410.811	300.676	153.435	0.676	2.000	0.500	1.000
1695	0.457	1.000	0.956	100	524.324	300.676	135.000	0.676	1.000	1.000	1.000
1696	0.913	0.785	1.911	100	564.865	302.027	45.000	0.956	2.646	0.378	0.667
1697	0.457	1.000	0.956	100	709.459	300.676	135.000	0.676	1.000	1.000	1.000
1698	1.826	0.611	3.022	100	910.135	302.027	26.565	1.284	3.093	0.323	0.667
1699	1.370	1.000	1.911	100	1072.973	302.027	45.000	1.351	1.464	0.683	0.857
1700	0.913	1.000	1.511	100	1108.108	300.676	153.435	0.676	2.000	0.500	1.000
1701	0.457	1.000	0.956	100	318.243	301.351	135.000	0.676	1.000	1.000	1.000
1702	17.805	0.438	6.957	100	358.108	301.351	150.945	6.028	1.122	0.892	0.709
1703	0.457	1.000	0.956	100	1118.919	301.351	135.000	0.676	1.000	1.000	1.000
1704	1.826	0.611	3.022	100	128.378	302.027	153.435	1.209	3.493	0.286	0.667
1705	0.457	1.000	0.956	100	189.189	302.027	135.000	0.676	1.000	1.000	1.000
1706	7.761	0.649	5.447	100	275.000	302.027	150.255	3.115	1.842	0.543	0.680
1707	0.457	1.000	0.956	100	529.054	302.027	135.000	0.676	1.000	1.000	1.000
1708	0.457	1.000	0.956	100	535.135	302.027	135.000	0.676	1.000	1.000	1.000
1709	0.457	1.000	0.956	100	683.108	302.027	135.000	0.676	1.000	1.000	1.000
1710	0.457	1.000	0.956	100	945.270	302.027	135.000	0.676	1.000	1.000	1.000
1711	1.826	0.740	2.786	100	1121.622	302.027	165.964	0.676	4.000	0.250	1.000
1712	1.370	0.967	2.137	100	1131.757	302.027	161.565	0.676	3.000	0.333	1.000
1713	0.457	1.000	0.956	100	16.216	302.703	135.000	0.676	1.000	1.000	1.000
1714	0.457	1.000	0.956	100	124.324	302.703	135.000	0.676	1.000	1.000	1.000
1715	8.218	0.687	5.146	100	502.027	307.432	66.801	3.112	1.548	0.646	0.720
1716	1.826	0.698	2.867	100	572.297	304.730	45.000	1.433	2.654	0.377	0.667
1717	7.761	0.486	5.572	100	577.027	308.108	75.964	2.703	2.316	0.432	0.654
1718	0.457	1.000	0.956	100	642.568	302.703	135.000	0.676	1.000	1.000	1.000
1719	1.370	0.967	2.137	100	687.162	302.703	161.565	0.676	3.000	0.333	1.000
1720	3.196	1.000	2.867	100	1093.919	304.730	45.000	1.911	1.596	0.626	0.875
1721	5.935	0.368	6.891	100	1097.297	304.054	11.310	1.351	6.389	0.157	0.788
1722	0.457	1.000	0.956	100	738.514	303.378	135.000	0.676	1.000	1.000	1.000
1723	0.457	1.000	0.956	100	854.054	303.378	135.000	0.676	1.000	1.000	1.000
1724	0.457	1.000	0.956	100	125.676	304.054	135.000	0.676	1.000	1.000	1.000
1725	0.457	1.000	0.956	100	567.568	304.054	135.000	0.676	1.000	1.000	1.000
1726	0.457	1.000	0.956	100	689.865	304.054	135.000	0.676	1.000	1.000	1.000
1727	1.370	0.967	2.137	100	1033.784	304.054	161.565	0.676	3.000	0.333	1.000
1728	2.283	1.000	2.436	100	88.514	304.730	123.690	1.351	1.553	0.644	0.909
1729	0.913	1.000	1.511	100	286.486	305.405	116.565	0.676	2.000	0.500	1.000
1730	0.913	1.000	1.511	100	564.189	305.405	153.435	0.676	2.000	0.500	1.000
1731	2.283	1.000	2.436	100	843.243	305.405	123.690	1.351	1.553	0.644	0.909
1732	10.957	0.649	5.277	100	903.378	308.784	39.806	3.849	1.516	0.660	0.706
1733	0.457	1.000	0.956	100	16.216	306.081	135.000	0.676	1.000	1.000	1.000
1734	0.457	1.000	0.956	100	178.378	306.081	135.000	0.676	1.000	1.000	1.000
1735	0.913	1.000	1.511	100	571.622	306.081	153.435	0.676	2.000	0.500	1.000
1736	2.739	0.589	3.022	100	967.568	306.081	116.565	1.925	1.752	0.571	0.632
1737	5.478	0.781	4.533	100	1139.865	308.108	26.565	2.027	2.550	0.392	0.828
1738	0.913	1.000	1.511	100	561.486	306.757	116.565	0.676	2.000	0.500	1.000
1739	0.457	1.000	0.956	100	713.514	306.757	135.000	0.676	1.000	1.000	1.000
1740	3.652	1.000	3.378	100	1063.514	306.757	143.130	1.814	2.179	0.459	0.800
1741	0.913	1.000	1.511	100	87.162	307.432	153.435	0.676	2.000	0.500	1.000
1742	9.131	0.453	7.277	100	89.865	308.108	158.199	2.667	3.347	0.299	0.645
1743	0.913	1.000	1.511	100	219.595	307.432	153.435	0.676	2.000	0.500	1.000
1744	0.457	1.000	0.956	100	287.162	307.432	135.000	0.676	1.000	1.000	1.000
1745	1.370	0.643	2.436	100	469.595	307.432	123.690	1.209	2.702	0.370	0.667
1746	0.457	1.000	0.956	100	718.919	307.432	135.000	0.676	1.000	1.000	1.000
1747	1.370	0.809	2.137	100	727.027	307.432	108.435	0.676	3.000	0.333	1.000
1748	2641.527	0.156	146.908	93.069	678.378	404.730	37.713	40.624	4.245	0.236	0.528
1749	0.457	1.000	0.956	100	205.405	308.108	135.000	0.676	1.000	1.000	1.000
1750	0.913	1.000	1.511	100	210.811	308.108	153.435	0.676	2.000	0.500	1.000
1751	0.913	1.000	1.511	100	273.649	308.108	153.435	0.676	2.000	0.500	1.000
1752	4.109	0.698	3.940	100	710.135	310.135	30.964	1.911	2.267	0.441	0.692
1753	2.283	1.000	2.436	100	843.243	310.135	56.310	1.351	1.553	0.644	0.909
1754	0.913	1.000	1.511	100	1135.135	308.108	153.435	0.676	2.000	0.500	1.000
1755	0.457	1.000	0.956	100	48.649	308.784	135.000	0.676	1.000	1.000	1.000
1756	0.913	1.000	1.511	100	125.676	308.784	153.435	0.676	2.000	0.500	1.000
1757	0.913	1.000	1.511	100	200.676	308.784	153.435	0.676	2.000	0.500	1.000
1758	1.370	0.967	2.137	100	288.514	308.784	161.565	0.676	3.000	0.333	1.000
1759	0.913	1.000	1.511	100	560.811	308.784	153.435	0.676	2.000	0.500	1.000
1760	1.370	0.967	2.137	100	811.486	308.784	161.565	0.676	3.000	0.333	1.000
1761	33.784	0.479	10.916	98.649	272.297	319.595	68.199	5.025	2.228	0.449	0.767
1762	1.826	1.000	2.436	100	558.108	310.811	33.690	1.351	2.031	0.492	0.800
1763	0.457	1.000	0.956	100	596.622	309.459	135.000	0.676	1.000	1.000	1.000
1764	1.826	0.857	2.436	100	713.514	309.459	123.690	1.351	2.000	0.500	0.800
1765	1.826	0.740	2.786	100	324.324	310.135	165.964	0.676	4.000	0.250	1.000
1766	1.370	1.000	1.911	100	464.189	310.135	135.000	1.351	1.464	0.683	0.857
1767	0.913	1.000	1.511	100	675.676	310.135	153.435	0.676	2.000	0.500	1.000
1768	0.913	1.000	1.511	100	27.027	310.811	153.435	0.676	2.000	0.500	1.000
1769	2.283	0.873	2.867	100	97.297	310.811	135.000	1.433	2.308	0.433	0.769
1770	39.262	0.279	14.507	98.837	443.243	320.270	27.759	6.842	2.248	0.445	0.538
1771	0.457	1.000	0.956	100	46.622	311.486	135.000	0.676	1.000	1.000	1.000
1772	2.283	0.403	3.445	100	48.649	311.486	101.310	1.351	2.926	0.342	0.625
1773	1.370	0.967	2.137	100	167.568	311.486	161.565	0.676	3.000	0.333	1.000
1774	13.696	0.242	10.554	100	468.243	311.486	140.194	3.542	3.764	0.266	0.531
1775	0.457	1.000	0.956	100	675.676	311.486	135.000	0.676	1.000	1.000	1.000
1776	2.283	0.572	3.022	100	717.568	313.514	26.565	1.814	2.165	0.462	0.588
1777	3.196	0.564	3.940	100	911.486	311.486	120.964	1.814	2.927	0.342	0.636
1778	0.913	1.000	1.511	100	1108.108	311.486	153.435	0.676	2.000	0.500	1.000
1779	0.457	1.000	0.956	100	43.243	312.162	135.000	0.676	1.000	1.000	1.000
1780	1.370	0.967	2.137	100	324.324	312.162	161.565	0.676	3.000	0.333	1.000
1781	0.913	1.000	1.511	100	540.541	312.162	153.435	0.676	2.000	0.500	1.000
1782	22.370	0.205	13.581	100	543.243	313.514	5.711	4.054	3.390	0.295	0.580
1783	1.370	0.643	2.436	100	566.892	314.189	56.310	1.209	2.702	0.370	0.667
1784	0.457	1.000	0.956	100	725.000	312.162	135.000	0.676	1.000	1.000	1.000
1785	0.913	1.000	1.511	100	1035.135	312.162	153.435	0.676	2.000	0.500	1.000
1786	0.457	1.000	0.956	100	1037.838	312.162	135.000	0.676	1.000	1.000	1.000
1787	7.761	0.573	6.043	100	1097.297	314.865	26.565	2.515	2.950	0.339	0.791
1788	0.913	1.000	1.511	100	171.622	312.838	153.435	0.676	2.000	0.500	1.000
1789	1.370	0.967	2.137	100	206.757	312.838	161.565	0.676	3.000	0.333	1.000
1790	0.913	1.000	1.511	100	696.622	312.838	153.435	0.676	2.000	0.500	1.000
1791	0.913	1.000	1.511	100	29.730	313.514	153.435	0.676	2.000	0.500	1.000
1792	2.283	0.764	3.022	100	32.432	314.865	26.565	1.351	2.610	0.383	0.769
1793	0.457	1.000	0.956	100	39.865	313.514	135.000	0.676	1.000	1.000	1.000
1794	0.913	1.000	1.511	100	75.676	313.514	116.565	0.676	2.000	0.500	1.000
1795	0.457	1.000	0.956	100	81.081	313.514	135.000	0.676	1.000	1.000	1.000
1796	0.457	1.000	0.956	100	98.649	313.514	135.000	0.676	1.000	1.000	1.000
1797	0.913	1.000	1.511	100	140.541	313.514	153.435	0.676	2.000	0.500	1.000
1798	6.848	0.357	5.572	100	160.135	318.919	75.964	2.703	2.538	0.394	0.566
1799	3.196	0.387	4.919	100	164.189	313.514	164.055	1.327	5.173	0.193	0.667
1800	0.457	1.000	0.956	100	205.405	313.514	135.000	0.676	1.000	1.000	1.000
1801	0.457	1.000	0.956	100	643.243	313.514	135.000	0.676	1.000	1.000	1.000
1802	0.457	1.000	0.956	100	668.919	313.514	135.000	0.676	1.000	1.000	1.000
1803	0.457	1.000	0.956	100	670.270	313.514	135.000	0.676	1.000	1.000	1.000
1804	0.457	1.000	0.956	100	891.892	313.514	135.000	0.676	1.000	1.000	1.000
1805	14.153	0.331	9.090	100	1037.838	313.514	131.987	3.822	3.222	0.310	0.585
1806	1.370	1.000	1.911	100	1119.595	314.865	45.000	1.351	1.464	0.683	0.857
1807	7.305	0.740	5.146	100	172.973	316.216	23.199	2.027	2.181	0.459	0.865
1808	1.370	1.000	1.911	100	178.378	314.189	135.000	1.351	1.464	0.683	0.857
1809	0.913	1.000	1.511	100	194.595	314.189	153.435	0.676	2.000	0.500	1.000
1810	1.826	0.857	2.137	100	200.000	314.189	108.435	1.351	1.468	0.681	0.800
1811	0.913	1.000	1.511	100	450.000	314.189	153.435	0.676	2.000	0.500	1.000
1812	7.761	0.486	6.229	100	569.595	318.243	40.601	2.720	2.700	0.370	0.630
1813	1.370	0.967	2.137	100	660.135	314.189	161.565	0.676	3.000	0.333	1.000
1814	0.457	1.000	0.956	100	675.676	314.189	135.000	0.676	1.000	1.000	1.000
1815	0.913	1.000	1.511	100	925.000	314.865	153.435	0.676	2.000	0.500	1.000
1816	0.457	1.000	0.956	100	27.027	315.541	135.000	0.676	1.000	1.000	1.000
1817	1.370	0.967	2.137	100	102.703	315.541	161.565	0.676	3.000	0.333	1.000
1818	1.826	0.740	2.786	100	167.568	315.541	165.964	0.676	4.000	0.250	1.000
1819	0.913	1.000	1.511	100	318.919	315.541	153.435	0.676	2.000	0.500	1.000
1820	99.069	0.376	25.227	100	508.108	315.541	97.696	6.757	4.565	0.219	0.805
1821	1.370	0.967	2.137	100	661.486	315.541	161.565	0.676	3.000	0.333	1.000
1822	3.652	0.740	3.445	100	933.784	315.541	101.310	1.351	2.232	0.448	0.889
1823	1.370	0.754	2.436	100	141.892	317.568	33.690	1.209	2.702	0.370	0.667
1824	1.826	0.857	2.436	100	337.162	316.216	123.690	1.351	2.031	0.492	0.800
1825	1.370	0.967	2.137	100	562.162	316.216	161.565	0.676	3.000	0.333	1.000
1826	0.457	1.000	0.956	100	566.892	316.216	135.000	0.676	1.000	1.000	1.000
1827	1.826	0.857	2.137	100	695.270	316.216	108.435	1.351	1.468	0.681	0.800
1828	2.283	0.513	3.639	100	81.081	318.243	21.801	1.284	4.051	0.247	0.667
1829	0.913	1.000	1.511	100	149.324	316.892	153.435	0.676	2.000	0.500	1.000
1830	5.935	0.454	5.277	100	231.081	320.946	39.806	3.245	1.873	0.534	0.542
1831	0.457	1.000	0.956	100	610.135	316.892	135.000	0.676	1.000	1.000	1.000
1832	0.913	1.000	1.511	100	1135.135	316.892	153.435	0.676	2.000	0.500	1.000
1833	0.457	1.000	0.956	100	318.919	317.568	135.000	0.676	1.000	1.000	1.000
1834	0.457	1.000	0.956	100	683.784	317.568	135.000	0.676	1.000	1.000	1.000
1835	1.370	0.967	2.137	100	1143.919	317.568	161.565	0.676	3.000	0.333	1.000
1836	0.457	1.000	0.956	100	58.784	318.243	135.000	0.676	1.000	1.000	1.000
1837	4.109	0.799	3.378	100	156.081	318.243	126.870	2.565	1.310	0.763	0.720
1838	8.218	0.373	7.704	100	914.865	318.243	127.875	2.319	4.386	0.228	0.600
1839	0.457	1.000	0.956	100	162.162	318.919	135.000	0.676	1.000	1.000	1.000
1840	1.826	0.698	2.436	100	275.000	320.946	33.690	1.814	1.581	0.632	0.615
1841	0.913	1.000	1.511	100	478.378	318.919	153.435	0.676	2.000	0.500	1.000
1842	11.413	0.627	6.655	96	483.108	319.595	156.038	3.246	2.415	0.414	0.704
1843	2.739	0.769	3.378	100	663.514	320.946	36.870	1.433	2.810	0.356	0.750
1844	5.022	0.384	5.733	100	695.946	318.919	135.000	2.254	3.164	0.316	0.564
1845	0.913	1.000	1.511	100	718.919	318.919	116.565	0.676	2.000	0.500	1.000
1846	0.457	1.000	0.956	100	729.730	318.919	135.000	0.676	1.000	1.000	1.000
1847	0.457	1.000	0.956	100	1079.054	318.919	135.000	0.676	1.000	1.000	1.000
1848	0.457	1.000	0.956	100	53.378	319.595	135.000	0.676	1.000	1.000	1.000
1849	0.457	1.000	0.956	100	118.243	319.595	135.000	0.676	1.000	1.000	1.000
1850	0.457	1.000	0.956	100	329.730	319.595	135.000	0.676	1.000	1.000	1.000
1851	0.913	1.000	1.511	100	545.946	319.595	153.435	0.676	2.000	0.500	1.000
1852	0.457	1.000	0.956	100	600.000	319.595	135.000	0.676	1.000	1.000	1.000
1853	57.067	0.564	12.623	96	812.162	323.649	164.476	7.859	1.660	0.603	0.809
1854	2.283	0.764	3.022	100	931.081	320.946	26.565	1.351	2.610	0.383	0.769
1855	0.913	1.000	1.511	100	488.514	320.270	153.435	0.676	2.000	0.500	1.000
1856	0.457	1.000	0.956	100	1080.405	320.270	135.000	0.676	1.000	1.000	1.000
1857	0.457	1.000	0.956	100	1113.514	320.270	135.000	0.676	1.000	1.000	1.000
1858	1.370	1.000	1.911	100	48.649	320.946	135.000	1.351	1.464	0.683	0.857
1859	0.913	1.000	1.511	100	272.973	320.946	153.435	0.676	2.000	0.500	1.000
1860	4.109	0.521	4.326	100	872.297	323.649	38.660	2.116	2.356	0.424	0.667
1861	16.435	0.472	8.810	100	1042.568	322.973	175.601	3.378	2.675	0.374	0.713
1862	0.457	1.000	0.956	100	1115.541	320.946	135.000	0.676	1.000	1.000	1.000
1863	1.370	1.000	1.911	100	55.405	322.973	45.000	1.351	1.464	0.683	0.857
1864	0.457	1.000	0.956	100	499.324	321.622	135.000	0.676	1.000	1.000	1.000
1865	0.913	1.000	1.511	100	660.135	321.622	153.435	0.676	2.000	0.500	1.000
1866	3.196	0.647	3.639	100	677.027	325.000	68.199	1.351	2.982	0.335	0.824
1867	0.457	1.000	0.956	100	858.784	321.622	135.000	0.676	1.000	1.000	1.000
1868	0.913	1.000	1.511	100	1107.432	321.622	153.435	0.676	2.000	0.500	1.000
1869	0.457	1.000	0.956	100	86.486	322.297	135.000	0.676	1.000	1.000	1.000
1870	4.565	0.736	3.639	100	272.297	322.973	158.199	2.027	2.000	0.500	0.800
1871	0.457	1.000	0.956	100	491.216	322.297	135.000	0.676	1.000	1.000	1.000
1872	0.913	1.000	1.511	100	81.081	322.973	153.435	0.676	2.000	0.500	1.000
1873	0.457	1.000	0.956	100	575.676	322.973	135.000	0.676	1.000	1.000	1.000
1874	0.457	1.000	0.956	100	659.459	322.973	135.000	0.676	1.000	1.000	1.000
1875	0.457	1.000	0.956	100	713.514	322.973	135.000	0.676	1.000	1.000	1.000
1876	1.370	0.967	2.137	100	902.703	322.973	161.565	0.676	3.000	0.333	1.000
1877	0.913	1.000	1.511	100	143.919	323.649	153.435	0.676	2.000	0.500	1.000
1878	0.913	1.000	1.511	100	145.946	323.649	153.435	0.676	2.000	0.500	1.000
1879	1.370	1.000	1.911	100	265.541	325.000	45.000	1.351	1.464	0.683	0.857
1880	1.370	0.754	2.436	100	289.865	323.649	146.310	1.209	2.702	0.370	0.667
1881	3.652	0.820	3.639	100	368.919	325.000	21.801	1.351	2.392	0.418	0.889
1882	0.457	1.000	0.956	100	842.568	323.649	135.000	0.676	1.000	1.000	1.000
1883	1.370	0.967	2.137	100	894.595	323.649	161.565	0.676	3.000	0.333	1.000
1884	0.913	1.000	1.511	100	1114.189	323.649	153.435	0.676	2.000	0.500	1.000
1885	0.457	1.000	0.956	100	148.649	324.324	135.000	0.676	1.000	1.000	1.000
1886	3.652	0.914	3.378	100	155.405	326.351	36.870	1.911	1.939	0.516	0.842
1887	2.739	0.916	2.436	100	476.351	324.324	123.690	2.027	1.124	0.890	0.800
1888	0.913	1.000	1.511	100	551.351	324.324	153.435	0.676	2.000	0.500	1.000
1889	5.935	0.567	5.733	100	572.297	324.324	135.000	1.911	3.872	0.258	0.684
1890	0.457	1.000	0.956	100	632.432	324.324	135.000	0.676	1.000	1.000	1.000
1891	0.457	1.000	0.956	100	659.459	324.324	135.000	0.676	1.000	1.000	1.000
1892	0.913	1.000	1.511	100	686.486	324.324	153.435	0.676	2.000	0.500	1.000
1893	0.913	1.000	1.511	100	885.135	324.324	153.435	0.676	2.000	0.500	1.000
1894	0.457	1.000	0.956	100	902.703	324.324	135.000	0.676	1.000	1.000	1.000
1895	1.370	0.754	2.436	100	144.595	326.351	33.690	1.209	2.702	0.370	0.667
1896	3.196	0.943	3.022	100	808.784	325.000	153.435	1.351	1.936	0.517	0.933
1897	0.457	1.000	0.956	100	918.919	325.000	135.000	0.676	1.000	1.000	1.000
1898	0.457	1.000	0.956	100	1048.649	325.000	135.000	0.676	1.000	1.000	1.000
1899	0.457	1.000	0.956	100	149.324	325.676	135.000	0.676	1.000	1.000	1.000
1900	104.547	0.563	17.619	100	283.784	326.351	147.529	10.280	1.800	0.556	0.784
1901	0.913	1.000	1.511	100	551.351	325.676	116.565	0.676	2.000	0.500	1.000
1902	1.826	0.857	2.436	100	661.486	325.676	123.690	1.351	2.031	0.492	0.800
1903	2.739	0.916	2.786	100	669.595	325.676	165.964	1.351	1.809	0.553	0.857
1904	0.457	1.000	0.956	100	675.676	325.676	135.000	0.676	1.000	1.000	1.000
1905	0.913	0.785	1.911	100	685.811	325.676	135.000	0.956	2.646	0.378	0.667
1906	1.826	0.611	3.022	100	883.784	327.027	26.565	1.209	3.493	0.286	0.667
1907	1.826	1.000	2.436	100	402.027	326.351	146.310	1.351	2.031	0.492	0.800
1908	11.413	0.821	4.919	100	331.081	329.054	164.055	4.054	1.227	0.815	0.781
1909	0.913	1.000	1.511	100	666.892	327.027	153.435	0.676	2.000	0.500	1.000
1910	4.109	0.638	3.639	100	933.108	327.027	111.801	2.027	2.075	0.482	0.720
1911	0.457	1.000	0.956	100	58.784	327.703	135.000	0.676	1.000	1.000	1.000
1912	1.370	0.967	2.137	100	551.351	327.703	161.565	0.676	3.000	0.333	1.000
1913	17.348	0.289	8.653	100	562.838	334.459	38.660	5.158	2.233	0.448	0.563
1914	0.913	1.000	1.511	100	664.865	327.703	153.435	0.676	2.000	0.500	1.000
1915	2.283	0.764	2.786	100	668.919	327.703	165.964	1.351	2.188	0.457	0.769
1916	0.913	1.000	1.511	100	675.676	327.703	116.565	0.676	2.000	0.500	1.000
1917	4.565	0.806	3.940	100	152.703	328.378	120.964	2.027	2.198	0.455	0.833
1918	0.913	1.000	1.511	100	400.676	328.378	153.435	0.676	2.000	0.500	1.000
1919	0.913	1.000	1.511	100	800.000	328.378	153.435	0.676	2.000	0.500	1.000
1920	1.826	0.645	2.786	100	902.703	328.378	104.036	0.676	4.000	0.250	1.000
1921	0.457	1.000	0.956	100	1059.459	328.378	135.000	0.676	1.000	1.000	1.000
1922	1.826	0.740	2.786	100	1062.162	328.378	165.964	0.676	4.000	0.250	1.000
1923	0.457	1.000	0.956	100	1102.703	328.378	135.000	0.676	1.000	1.000	1.000
1924	0.457	1.000	0.956	100	688.514	329.054	135.000	0.676	1.000	1.000	1.000
1925	0.457	1.000	0.956	100	920.946	329.054	135.000	0.676	1.000	1.000	1.000
1926	0.913	1.000	1.511	100	156.081	329.730	153.435	0.676	2.000	0.500	1.000
1927	0.913	1.000	1.511	100	637.838	329.730	116.565	0.676	2.000	0.500	1.000
1928	0.457	1.000	0.956	100	694.595	329.730	135.000	0.676	1.000	1.000	1.000
1929	1.826	0.857	2.436	100	891.892	329.730	123.690	1.351	2.000	0.500	0.800
1930	0.457	1.000	0.956	100	1059.459	329.730	135.000	0.676	1.000	1.000	1.000
1931	0.457	1.000	0.956	100	556.081	330.405	135.000	0.676	1.000	1.000	1.000
1932	0.913	1.000	1.511	100	691.892	330.405	116.565	0.676	2.000	0.500	1.000
1933	0.913	1.000	1.511	100	935.135	330.405	116.565	0.676	2.000	0.500	1.000
1934	0.457	1.000	0.956	100	306.081	331.081	135.000	0.676	1.000	1.000	1.000
1935	3.196	0.515	4.273	100	308.108	332.432	18.435	1.351	4.378	0.228	0.737
1936	5.022	0.976	3.378	100	361.486	331.081	126.870	2.703	1.147	0.871	0.815
1937	0.457	1.000	0.956	100	437.162	331.081	135.000	0.676	1.000	1.000	1.000
1938	0.457	1.000	0.956	100	551.351	331.081	135.000	0.676	1.000	1.000	1.000
1939	2.283	0.674	3.022	100	675.676	331.081	153.435	1.351	2.749	0.364	0.769
1940	0.913	1.000	1.511	100	843.243	331.081	153.435	0.676	2.000	0.500	1.000
1941	2.283	1.000	2.436	100	1064.189	331.081	123.690	1.351	1.553	0.644	0.909
1942	1.370	0.643	2.436	100	685.811	333.784	56.310	1.209	2.702	0.370	0.667
1943	42.915	0.206	19.135	100	784.459	345.946	47.862	5.733	4.668	0.214	0.534
1944	0.457	1.000	0.956	100	1145.946	331.757	135.000	0.676	1.000	1.000	1.000
1945	0.913	1.000	1.511	100	52.703	332.432	153.435	0.676	2.000	0.500	1.000
1946	0.457	1.000	0.956	100	56.081	332.432	135.000	0.676	1.000	1.000	1.000
1947	0.913	1.000	1.511	100	570.270	333.108	153.435	0.676	2.000	0.500	1.000
1948	0.457	1.000	0.956	100	922.297	333.108	135.000	0.676	1.000	1.000	1.000
1949	9.587	0.752	5.277	100	431.081	333.784	129.806	3.327	1.592	0.628	0.778
1950	2.739	0.769	2.786	100	680.405	334.459	165.964	2.027	1.528	0.655	0.667
1951	0.457	1.000	0.956	100	1003.378	333.784	135.000	0.676	1.000	1.000	1.000
1952	0.913	1.000	1.511	100	154.054	334.459	153.435	0.676	2.000	0.500	1.000
1953	0.457	1.000	0.956	100	492.568	334.459	135.000	0.676	1.000	1.000	1.000
1954	0.457	1.000	0.956	100	54.054	335.135	135.000	0.676	1.000	1.000	1.000
1955	1.370	0.967	2.137	100	632.432	335.135	161.565	0.676	3.000	0.333	1.000
1956	0.913	1.000	1.511	100	799.324	335.135	116.565	0.676	2.000	0.500	1.000
1957	0.457	1.000	0.956	100	899.324	335.135	135.000	0.676	1.000	1.000	1.000
1958	1.370	0.754	2.436	100	1004.730	335.135	146.310	1.209	2.702	0.370	0.667
1959	4.109	0.832	3.639	100	154.054	335.811	111.801	1.351	2.386	0.419	0.947
1960	0.913	1.000	1.511	100	364.189	335.811	153.435	0.676	2.000	0.500	1.000
1961	3.196	0.564	3.940	100	488.514	335.811	149.036	2.027	2.391	0.418	0.636
1962	1.370	1.000	1.911	100	486.486	336.486	135.000	1.351	1.464	0.683	0.857
1963	17.348	0.538	7.554	92.105	934.459	339.189	169.695	4.668	1.530	0.653	0.704
1964	1.370	0.967	2.137	100	50.676	337.162	161.565	0.676	3.000	0.333	1.000
1965	9.587	0.916	4.872	100	1060.135	337.162	123.690	2.867	1.858	0.538	0.808
1966	1.370	1.000	1.911	100	48.649	339.189	45.000	1.351	1.464	0.683	0.857
1967	0.457	1.000	0.956	100	269.595	337.838	135.000	0.676	1.000	1.000	1.000
1968	0.913	1.000	1.511	100	370.270	337.838	116.565	0.676	2.000	0.500	1.000
1969	0.457	1.000	0.956	100	681.081	337.838	135.000	0.676	1.000	1.000	1.000
1970	0.913	1.000	1.511	100	489.865	338.514	153.435	0.676	2.000	0.500	1.000
1971	1.826	0.857	2.436	100	500.676	338.514	146.310	1.351	2.000	0.500	0.800
1972	1.370	1.000	1.911	100	783.784	339.865	45.000	1.351	1.464	0.683	0.857
1973	3.652	1.000	3.022	100	913.514	338.514	153.435	2.027	1.308	0.764	0.800
1974	0.457	1.000	0.956	100	81.081	339.189	135.000	0.676	1.000	1.000	1.000
1975	0.457	1.000	0.956	100	24.324	339.865	135.000	0.676	1.000	1.000	1.000
1976	0.913	1.000	1.511	100	43.243	339.865	153.435	0.676	2.000	0.500	1.000
1977	0.457	1.000	0.956	100	83.784	339.865	135.000	0.676	1.000	1.000	1.000
1978	0.457	1.000	0.956	100	106.757	339.865	135.000	0.676	1.000	1.000	1.000
1979	0.457	1.000	0.956	100	154.730	339.865	135.000	0.676	1.000	1.000	1.000
1980	0.457	1.000	0.956	100	627.027	339.865	135.000	0.676	1.000	1.000	1.000
1981	0.457	1.000	0.956	100	1008.784	339.865	135.000	0.676	1.000	1.000	1.000
1982	0.457	1.000	0.956	100	22.973	340.541	135.000	0.676	1.000	1.000	1.000
1983	2.739	0.769	3.378	100	60.811	340.541	143.130	1.433	2.810	0.356	0.750
1984	1.370	0.967	2.137	100	77.027	340.541	161.565	0.676	3.000	0.333	1.000
1985	1.370	0.967	2.137	100	80.405	340.541	161.565	0.676	3.000	0.333	1.000
1986	0.913	1.000	1.511	100	502.703	340.541	153.435	0.676	2.000	0.500	1.000
1987	2.283	0.873	2.436	100	612.838	340.541	123.690	1.814	1.496	0.668	0.714
1988	0.457	1.000	0.956	100	675.676	340.541	135.000	0.676	1.000	1.000	1.000
1989	0.913	1.000	1.511	100	43.243	341.216	153.435	0.676	2.000	0.500	1.000
1990	0.457	1.000	0.956	100	630.405	341.216	135.000	0.676	1.000	1.000	1.000
1991	1.370	0.754	2.436	100	875.676	342.568	33.690	1.209	2.702	0.370	0.667
1992	1.370	0.967	2.137	100	931.757	341.216	161.565	0.676	3.000	0.333	1.000
1993	0.457	1.000	0.956	100	113.514	341.892	135.000	0.676	1.000	1.000	1.000
1994	7.305	0.671	5.447	100	125.000	346.622	60.255	2.295	2.848	0.351	0.780
1995	1.826	0.611	3.022	100	154.730	343.243	26.565	1.209	3.493	0.286	0.667
1996	0.457	1.000	0.956	100	881.757	341.892	135.000	0.676	1.000	1.000	1.000
1997	1.370	0.967	2.137	100	939.865	341.892	161.565	0.676	3.000	0.333	1.000
1998	12.783	0.233	8.784	100	1004.730	342.568	157.380	5.937	1.773	0.564	0.403
1999	0.913	1.000	1.511	100	83.108	342.568	153.435	0.676	2.000	0.500	1.000
[truncated: 2,554 more rows]
