# Supplementary material for: Microwave Dielectric Properties of CCTO/PVA Composites
Source: Hindawi journal article supplement (doi:10.1155/2018/6067519), 2018-01-01
Supplement: f1 [file 6067519.f1.zip › 6067519.f1/3_Porosidade_pva_ccto_50x100.xls]

Slice	Count	Total Area	Average Size	%Area	Circ.	Solidity	Feret	FeretX	FeretY	FeretAngle	MinFeret
pva_ccto_50x100_sembarra.tif	4785	18176.589	3.799	2.009	0.886	0.908	2.577	544.850	434.808	125.068	1.298
