# Supplementary material for: Microwave Dielectric Properties of CCTO/PVA Composites
Source: Hindawi journal article supplement (doi:10.1155/2018/6067519), 2018-01-01
Supplement: f1 [file 6067519.f1.zip › 6067519.f1/3b_poros_total_pva_ccto_50_100x.xls]

	Area	Circ.	Feret	%Area	FeretX	FeretY	FeretAngle	MinFeret	AR	Round	Solidity
1	17.805	0.552	8.220	100	923.649	8.784	80.538	4.054	2.319	0.431	0.757
2	0.457	1.000	0.956	100	502.703	1.351	135.000	0.676	1.000	1.000	1.000
3	2.283	0.764	2.786	100	703.378	2.027	165.964	1.351	2.188	0.457	0.769
4	0.457	1.000	0.956	100	1003.378	2.027	135.000	0.676	1.000	1.000	1.000
5	1.370	1.000	1.911	100	687.838	4.054	45.000	1.351	1.464	0.683	0.857
6	2.739	0.916	3.022	100	703.378	4.730	26.565	1.351	2.082	0.480	0.857
7	0.457	1.000	0.956	100	33.108	4.054	135.000	0.676	1.000	1.000	1.000
8	0.457	1.000	0.956	100	118.243	4.054	135.000	0.676	1.000	1.000	1.000
9	0.913	1.000	1.511	100	172.297	4.054	153.435	0.676	2.000	0.500	1.000
10	1.370	1.000	1.911	100	287.838	5.405	45.000	1.351	1.464	0.683	0.857
11	0.457	1.000	0.956	100	445.946	4.054	135.000	0.676	1.000	1.000	1.000
12	2.283	1.000	2.436	100	691.892	4.054	146.310	1.351	1.553	0.644	0.909
13	0.457	1.000	0.956	100	183.784	4.730	135.000	0.676	1.000	1.000	1.000
14	0.457	1.000	0.956	100	504.730	4.730	135.000	0.676	1.000	1.000	1.000
15	0.457	1.000	0.956	100	681.081	4.730	135.000	0.676	1.000	1.000	1.000
16	8.218	0.606	4.533	100	843.243	6.757	26.565	3.934	1.104	0.906	0.679
17	0.457	1.000	0.956	100	59.459	6.081	135.000	0.676	1.000	1.000	1.000
18	0.913	1.000	1.511	100	689.865	6.081	153.435	0.676	2.000	0.500	1.000
19	0.457	1.000	0.956	100	691.892	6.081	135.000	0.676	1.000	1.000	1.000
20	2.739	1.000	2.436	100	29.054	6.757	146.310	1.351	1.500	0.667	1.000
21	0.457	1.000	0.956	100	161.486	6.757	135.000	0.676	1.000	1.000	1.000
22	1.826	1.000	2.436	100	58.108	8.108	146.310	1.351	2.031	0.492	0.800
23	0.457	1.000	0.956	100	82.432	8.108	135.000	0.676	1.000	1.000	1.000
24	0.457	1.000	0.956	100	158.784	8.108	135.000	0.676	1.000	1.000	1.000
25	0.913	1.000	1.511	100	191.892	8.108	153.435	0.676	2.000	0.500	1.000
26	4.565	0.419	5.146	100	220.946	8.108	113.199	1.814	3.623	0.276	0.690
27	0.457	1.000	0.956	100	508.784	8.108	135.000	0.676	1.000	1.000	1.000
28	0.913	1.000	1.511	100	835.135	8.108	153.435	0.676	2.000	0.500	1.000
29	7.761	0.649	5.277	100	1135.135	8.784	140.194	3.245	2.075	0.482	0.680
30	1.826	0.611	3.022	100	285.811	10.135	26.565	1.284	3.093	0.323	0.667
31	0.457	1.000	0.956	100	1118.919	8.784	135.000	0.676	1.000	1.000	1.000
32	0.457	1.000	0.956	100	246.622	9.459	135.000	0.676	1.000	1.000	1.000
33	1.370	0.754	2.436	100	274.324	10.811	33.690	1.209	2.702	0.370	0.667
34	46.110	0.555	10.895	100	853.378	10.135	97.125	7.692	1.482	0.675	0.748
35	14.153	0.400	8.164	100	1109.459	10.135	155.556	4.917	2.352	0.425	0.549
36	0.457	1.000	0.956	100	1129.054	10.135	135.000	0.676	1.000	1.000	1.000
37	0.913	1.000	1.511	100	73.649	10.811	153.435	0.676	2.000	0.500	1.000
38	0.457	1.000	0.956	100	124.324	10.811	135.000	0.676	1.000	1.000	1.000
39	0.913	1.000	1.511	100	130.405	10.811	153.435	0.676	2.000	0.500	1.000
40	5.022	0.976	3.940	100	1128.378	13.514	30.964	2.027	1.892	0.528	0.880
41	0.457	1.000	0.956	100	535.135	12.162	135.000	0.676	1.000	1.000	1.000
42	0.457	1.000	0.956	100	260.135	12.838	135.000	0.676	1.000	1.000	1.000
43	3.652	0.567	3.940	100	824.324	14.865	30.964	1.713	2.916	0.343	0.667
44	0.457	1.000	0.956	100	843.243	12.838	135.000	0.676	1.000	1.000	1.000
45	1.370	1.000	1.911	100	66.892	14.865	45.000	1.351	1.464	0.683	0.857
46	4.565	0.579	4.326	100	706.081	14.189	141.340	2.419	2.179	0.459	0.645
47	0.457	1.000	0.956	100	819.595	14.189	135.000	0.676	1.000	1.000	1.000
48	0.457	1.000	0.956	100	842.568	14.189	135.000	0.676	1.000	1.000	1.000
49	0.913	1.000	1.511	100	870.270	14.189	116.565	0.676	2.000	0.500	1.000
50	0.913	1.000	1.511	100	1136.486	14.189	116.565	0.676	2.000	0.500	1.000
51	1.370	0.967	2.137	100	70.270	14.865	161.565	0.676	3.000	0.333	1.000
52	2.283	0.873	2.436	100	41.216	17.568	33.690	1.814	1.496	0.668	0.714
53	1.370	1.000	1.911	100	66.216	15.541	135.000	1.351	1.464	0.683	0.857
54	0.457	1.000	0.956	100	75.676	15.541	135.000	0.676	1.000	1.000	1.000
55	2.739	1.000	2.436	100	846.622	15.541	146.310	1.351	1.500	0.667	1.000
56	1.826	0.857	2.436	100	872.297	16.892	33.690	1.351	2.000	0.500	0.800
57	0.913	1.000	1.511	100	77.027	16.216	153.435	0.676	2.000	0.500	1.000
58	0.457	1.000	0.956	100	151.351	16.892	135.000	0.676	1.000	1.000	1.000
59	3.196	0.687	3.822	100	238.514	19.595	45.000	1.876	2.590	0.386	0.667
60	1.826	1.000	2.137	100	869.595	17.568	161.565	1.351	1.468	0.681	0.800
61	1.826	1.000	2.137	100	1141.216	17.568	161.565	1.351	1.468	0.681	0.800
62	0.913	1.000	1.511	100	66.216	18.243	116.565	0.676	2.000	0.500	1.000
63	0.457	1.000	0.956	100	194.595	18.243	135.000	0.676	1.000	1.000	1.000
64	7.305	0.539	5.812	100	708.784	18.243	144.462	2.867	2.287	0.437	0.696
65	1.370	0.643	2.436	100	1112.838	20.270	56.310	1.209	2.702	0.370	0.667
66	24.196	0.460	11.625	100	810.811	25.676	35.538	4.059	3.947	0.253	0.702
67	1.370	0.967	2.137	100	54.054	19.595	161.565	0.676	3.000	0.333	1.000
68	0.457	1.000	0.956	100	196.622	19.595	135.000	0.676	1.000	1.000	1.000
69	0.457	1.000	0.956	100	32.432	20.270	135.000	0.676	1.000	1.000	1.000
70	9.131	0.815	4.872	100	95.270	23.649	33.690	3.344	1.370	0.730	0.769
71	2.739	0.916	3.022	100	64.189	20.946	153.435	1.351	2.082	0.480	0.857
72	0.913	1.000	1.511	100	129.730	20.946	153.435	0.676	2.000	0.500	1.000
73	0.913	1.000	1.511	100	140.541	20.946	153.435	0.676	2.000	0.500	1.000
74	3.196	0.647	3.639	100	370.270	20.946	111.801	1.351	2.731	0.366	0.824
75	0.913	1.000	1.511	100	646.622	20.946	153.435	0.676	2.000	0.500	1.000
76	0.913	1.000	1.511	100	665.541	20.946	153.435	0.676	2.000	0.500	1.000
77	0.457	1.000	0.956	100	698.649	20.946	135.000	0.676	1.000	1.000	1.000
78	88.112	0.263	17.851	100	718.919	20.946	150.524	10.297	2.111	0.474	0.637
79	0.457	1.000	0.956	100	124.324	21.622	135.000	0.676	1.000	1.000	1.000
80	0.457	1.000	0.956	100	268.919	21.622	135.000	0.676	1.000	1.000	1.000
81	0.457	1.000	0.956	100	67.568	22.297	135.000	0.676	1.000	1.000	1.000
82	42.915	0.151	16.440	100	697.297	22.297	99.462	9.201	1.971	0.507	0.400
83	1.370	0.967	2.137	100	714.865	22.297	161.565	0.676	3.000	0.333	1.000
84	0.457	1.000	0.956	100	37.162	22.973	135.000	0.676	1.000	1.000	1.000
85	1.826	0.698	2.867	100	479.054	25.000	45.000	1.433	2.654	0.377	0.667
86	0.913	1.000	1.511	100	610.811	22.973	153.435	0.676	2.000	0.500	1.000
87	2.739	1.000	2.867	100	674.324	22.973	135.000	1.814	1.809	0.553	0.800
88	2.283	0.513	3.639	100	315.541	25.000	21.801	1.311	3.678	0.272	0.667
89	0.457	1.000	0.956	100	37.838	24.324	135.000	0.676	1.000	1.000	1.000
90	0.457	1.000	0.956	100	334.459	24.324	135.000	0.676	1.000	1.000	1.000
91	0.457	1.000	0.956	100	129.730	25.000	135.000	0.676	1.000	1.000	1.000
92	30.588	0.385	13.864	98.507	561.486	35.135	46.975	4.300	3.876	0.258	0.698
93	2.283	1.000	2.436	100	977.027	25.000	123.690	1.351	1.553	0.644	0.909
94	16.435	0.454	8.358	100	21.622	30.405	14.036	4.254	2.049	0.488	0.637
95	0.457	1.000	0.956	100	43.243	25.676	135.000	0.676	1.000	1.000	1.000
96	1.826	1.000	1.911	100	70.270	25.676	135.000	1.351	1.000	1.000	1.000
97	0.457	1.000	0.956	100	401.351	25.676	135.000	0.676	1.000	1.000	1.000
98	5.935	0.584	3.940	100	479.730	25.676	120.964	3.190	1.362	0.734	0.667
99	3.196	0.564	3.639	100	597.297	25.676	158.199	2.027	2.245	0.445	0.636
100	1.370	0.967	2.137	100	738.514	25.676	161.565	0.676	3.000	0.333	1.000
101	1.370	0.754	2.436	100	879.054	25.676	146.310	1.209	2.702	0.370	0.667
102	1.370	0.967	2.137	100	968.919	25.676	161.565	0.676	3.000	0.333	1.000
103	0.457	1.000	0.956	100	154.054	26.351	135.000	0.676	1.000	1.000	1.000
104	1.370	0.754	2.436	100	366.892	26.351	146.310	1.209	2.702	0.370	0.667
105	0.457	1.000	0.956	100	591.892	26.351	135.000	0.676	1.000	1.000	1.000
106	0.457	1.000	0.956	100	118.919	27.027	135.000	0.676	1.000	1.000	1.000
107	0.913	1.000	1.511	100	270.270	27.027	153.435	0.676	2.000	0.500	1.000
108	0.457	1.000	0.956	100	393.919	27.027	135.000	0.676	1.000	1.000	1.000
109	0.457	1.000	0.956	100	401.351	27.027	135.000	0.676	1.000	1.000	1.000
110	1.370	0.754	2.436	100	577.027	28.378	33.690	1.209	2.702	0.370	0.667
111	6.848	0.505	4.919	100	735.135	29.730	15.945	2.459	2.090	0.478	0.698
112	0.457	1.000	0.956	100	873.649	27.027	135.000	0.676	1.000	1.000	1.000
113	3.196	0.621	3.940	100	967.568	29.054	30.964	1.513	3.288	0.304	0.700
114	1.826	1.000	1.911	100	1114.865	27.027	135.000	1.351	1.000	1.000	1.000
115	7.761	0.609	5.773	100	45.270	27.703	159.444	2.524	2.791	0.358	0.739
116	12.783	0.475	8.164	96.429	798.649	31.757	24.444	3.693	2.334	0.428	0.675
117	1.826	1.000	2.436	100	117.568	28.378	146.310	1.351	2.031	0.492	0.800
118	0.913	1.000	1.511	100	142.568	28.378	153.435	0.676	2.000	0.500	1.000
119	0.913	1.000	1.511	100	677.703	28.378	116.565	0.676	2.000	0.500	1.000
120	0.457	1.000	0.956	100	367.568	29.054	135.000	0.676	1.000	1.000	1.000
121	0.913	1.000	1.511	100	340.541	30.405	153.435	0.676	2.000	0.500	1.000
122	0.913	1.000	1.511	100	730.405	30.405	153.435	0.676	2.000	0.500	1.000
123	4.109	0.638	4.326	100	1113.514	33.784	51.340	1.911	2.874	0.348	0.720
124	9.131	0.331	8.220	100	610.135	31.757	170.538	2.027	3.709	0.270	0.678
125	1.826	0.611	3.022	100	68.243	31.757	153.435	1.284	3.093	0.323	0.667
126	0.457	1.000	0.956	100	341.216	31.757	135.000	0.676	1.000	1.000	1.000
127	3.652	0.588	4.110	100	686.486	32.432	170.538	1.351	3.152	0.317	0.800
128	0.913	1.000	1.511	100	1138.514	31.757	153.435	0.676	2.000	0.500	1.000
129	0.457	1.000	0.956	100	376.351	32.432	135.000	0.676	1.000	1.000	1.000
130	3.652	0.710	3.822	100	788.514	32.432	135.000	2.254	2.096	0.477	0.667
131	0.457	1.000	0.956	100	792.568	32.432	135.000	0.676	1.000	1.000	1.000
132	3.652	1.000	2.867	100	968.243	32.432	135.000	2.027	1.229	0.814	0.941
133	26.023	0.609	8.164	98.246	1116.216	32.432	114.444	5.817	1.307	0.765	0.740
134	0.457	1.000	0.956	100	118.243	33.784	135.000	0.676	1.000	1.000	1.000
135	1.826	1.000	2.436	100	119.595	33.784	146.310	1.351	2.031	0.492	0.800
136	0.457	1.000	0.956	100	129.730	33.784	135.000	0.676	1.000	1.000	1.000
137	0.913	1.000	1.511	100	162.838	33.784	153.435	0.676	2.000	0.500	1.000
138	0.457	1.000	0.956	100	1044.595	33.784	135.000	0.676	1.000	1.000	1.000
139	0.913	1.000	1.511	100	75.676	35.135	116.565	0.676	2.000	0.500	1.000
140	0.457	1.000	0.956	100	102.027	35.135	135.000	0.676	1.000	1.000	1.000
141	2.739	1.000	2.867	100	117.568	35.135	135.000	1.814	1.809	0.553	0.800
142	0.913	1.000	1.511	100	235.811	35.135	116.565	0.676	2.000	0.500	1.000
143	0.457	1.000	0.956	100	377.703	35.135	135.000	0.676	1.000	1.000	1.000
144	2.283	1.000	2.436	100	683.784	36.486	33.690	1.351	1.553	0.644	0.909
145	0.913	1.000	1.511	100	787.838	35.135	153.435	0.676	2.000	0.500	1.000
146	5.022	0.659	4.110	100	93.919	35.811	99.462	2.027	2.180	0.459	0.786
147	0.457	1.000	0.956	100	225.000	35.811	135.000	0.676	1.000	1.000	1.000
148	0.457	1.000	0.956	100	471.622	35.811	135.000	0.676	1.000	1.000	1.000
149	0.457	1.000	0.956	100	837.838	35.811	135.000	0.676	1.000	1.000	1.000
150	0.913	1.000	1.511	100	702.703	36.486	153.435	0.676	2.000	0.500	1.000
151	9.131	0.307	7.909	100	716.216	36.486	109.983	2.693	3.831	0.261	0.588
152	0.913	1.000	1.511	100	95.270	37.162	153.435	0.676	2.000	0.500	1.000
153	12.783	0.226	12.404	100	331.081	37.162	150.642	2.945	5.246	0.191	0.475
154	0.457	1.000	0.956	100	471.622	37.162	135.000	0.676	1.000	1.000	1.000
155	42.001	0.369	11.184	100	510.811	40.541	154.983	6.650	1.564	0.640	0.705
156	5.478	0.695	4.326	100	776.351	37.838	141.340	2.814	2.021	0.495	0.667
157	1.370	1.000	1.911	100	968.243	37.162	135.000	1.351	1.464	0.683	0.857
158	2.739	0.916	2.867	100	1048.649	37.162	135.000	1.911	1.593	0.628	0.857
159	2.739	0.686	3.378	100	18.243	40.541	53.130	1.513	2.778	0.360	0.706
160	0.457	1.000	0.956	100	97.297	37.838	135.000	0.676	1.000	1.000	1.000
161	0.457	1.000	0.956	100	300.000	37.838	135.000	0.676	1.000	1.000	1.000
162	0.457	1.000	0.956	100	448.649	37.838	135.000	0.676	1.000	1.000	1.000
163	0.457	1.000	0.956	100	683.108	37.838	135.000	0.676	1.000	1.000	1.000
164	0.913	1.000	1.511	100	703.378	37.838	153.435	0.676	2.000	0.500	1.000
165	0.913	1.000	1.511	100	121.622	38.514	153.435	0.676	2.000	0.500	1.000
166	2.283	0.873	2.436	100	128.378	39.865	33.690	1.814	1.496	0.668	0.714
167	0.913	1.000	1.511	100	270.270	38.514	116.565	0.676	2.000	0.500	1.000
168	0.913	0.785	1.911	100	471.622	38.514	135.000	0.956	2.646	0.378	0.667
169	4.565	0.806	3.639	100	755.405	39.865	21.801	2.027	1.476	0.678	0.800
170	92.677	0.287	19.135	100	230.405	56.081	47.862	14.251	1.612	0.620	0.527
171	5.022	0.448	3.940	100	695.270	41.892	30.964	2.703	1.315	0.761	0.667
172	5.935	0.646	5.146	100	702.703	39.189	156.801	2.027	3.000	0.333	0.812
173	0.457	1.000	0.956	100	829.054	39.189	135.000	0.676	1.000	1.000	1.000
174	0.457	1.000	0.956	100	1016.892	39.189	135.000	0.676	1.000	1.000	1.000
175	1.370	0.967	2.137	100	131.757	39.865	161.565	0.676	3.000	0.333	1.000
176	0.457	1.000	0.956	100	567.568	39.865	135.000	0.676	1.000	1.000	1.000
177	5.935	0.280	7.277	100	687.838	39.865	158.199	2.139	5.054	0.198	0.473
178	0.913	1.000	1.511	100	753.378	39.865	153.435	0.676	2.000	0.500	1.000
179	15.066	0.351	10.045	100	768.243	40.541	160.346	4.054	2.630	0.380	0.611
180	3.196	0.564	3.639	100	1051.351	41.216	21.801	1.967	2.399	0.417	0.636
181	0.457	1.000	0.956	100	264.189	40.541	135.000	0.676	1.000	1.000	1.000
182	0.457	1.000	0.956	100	491.216	40.541	135.000	0.676	1.000	1.000	1.000
183	22.827	0.342	9.674	100	707.432	45.270	24.775	5.405	1.385	0.722	0.602
184	0.457	1.000	0.956	100	858.784	40.541	135.000	0.676	1.000	1.000	1.000
185	0.457	1.000	0.956	100	129.054	41.216	135.000	0.676	1.000	1.000	1.000
186	0.457	1.000	0.956	100	702.027	41.216	135.000	0.676	1.000	1.000	1.000
187	2.283	1.000	2.436	100	764.189	43.243	56.310	1.351	1.553	0.644	0.909
188	0.913	1.000	1.511	100	968.243	41.216	153.435	0.676	2.000	0.500	1.000
189	0.457	1.000	0.956	100	1135.811	41.216	135.000	0.676	1.000	1.000	1.000
190	34.240	0.564	12.181	97.333	27.703	47.297	19.440	5.625	2.356	0.424	0.754
191	0.457	1.000	0.956	100	124.324	41.892	135.000	0.676	1.000	1.000	1.000
192	0.457	1.000	0.956	100	267.568	41.892	135.000	0.676	1.000	1.000	1.000
193	2.739	0.503	4.110	100	349.324	41.892	170.538	0.676	6.000	0.167	1.000
194	1.826	0.611	3.022	100	562.838	41.892	153.435	1.209	3.493	0.286	0.667
195	0.457	1.000	0.956	100	700.676	41.892	135.000	0.676	1.000	1.000	1.000
196	5.022	0.448	4.326	100	703.378	41.892	141.340	2.703	1.538	0.650	0.595
197	0.457	1.000	0.956	100	783.784	41.892	135.000	0.676	1.000	1.000	1.000
198	0.913	0.785	1.911	100	15.541	43.919	45.000	0.956	2.646	0.378	0.667
199	0.457	1.000	0.956	100	936.486	42.568	135.000	0.676	1.000	1.000	1.000
200	1.370	1.000	1.911	100	1120.270	43.919	45.000	1.351	1.464	0.683	0.857
201	1.370	1.000	1.911	100	350.676	44.595	45.000	1.351	1.464	0.683	0.857
202	0.457	1.000	0.956	100	464.189	43.243	135.000	0.676	1.000	1.000	1.000
203	0.913	1.000	1.511	100	506.757	43.243	153.435	0.676	2.000	0.500	1.000
204	0.457	1.000	0.956	100	702.027	43.243	135.000	0.676	1.000	1.000	1.000
205	3.652	0.621	3.378	100	782.432	43.919	143.130	2.389	1.581	0.632	0.667
206	2.739	0.532	3.940	100	822.297	45.270	30.964	1.500	3.827	0.261	0.632
207	0.457	1.000	0.956	100	324.324	43.919	135.000	0.676	1.000	1.000	1.000
208	10.957	0.390	7.554	100	500.000	47.973	26.565	3.374	3.297	0.303	0.615
209	4.109	0.923	3.022	100	564.189	43.919	116.565	2.027	1.343	0.745	0.857
210	19.175	0.683	7.309	97.619	678.378	50.000	56.310	4.235	1.822	0.549	0.800
211	4.565	0.650	4.273	100	854.054	43.919	161.565	1.351	3.306	0.303	0.833
212	0.457	1.000	0.956	100	42.568	44.595	135.000	0.676	1.000	1.000	1.000
213	0.457	1.000	0.956	100	13.514	45.270	135.000	0.676	1.000	1.000	1.000
214	0.913	1.000	1.511	100	129.730	45.270	153.435	0.676	2.000	0.500	1.000
215	0.913	1.000	1.511	100	397.973	45.270	153.435	0.676	2.000	0.500	1.000
216	0.457	1.000	0.956	100	718.243	45.946	135.000	0.676	1.000	1.000	1.000
217	0.457	1.000	0.956	100	854.054	45.946	135.000	0.676	1.000	1.000	1.000
218	0.913	1.000	1.511	100	367.568	46.622	116.565	0.676	2.000	0.500	1.000
219	3.652	0.520	4.533	100	628.378	46.622	153.435	1.690	3.563	0.281	0.667
220	0.913	0.785	1.911	100	91.216	47.297	135.000	0.956	2.646	0.378	0.667
221	1.370	0.967	2.137	100	124.324	47.297	161.565	0.676	3.000	0.333	1.000
222	1.370	0.809	2.137	100	521.622	47.297	108.435	0.676	3.000	0.333	1.000
223	0.457	1.000	0.956	100	31.081	47.973	135.000	0.676	1.000	1.000	1.000
224	0.913	1.000	1.511	100	407.432	47.973	153.435	0.676	2.000	0.500	1.000
225	0.457	1.000	0.956	100	461.486	47.973	135.000	0.676	1.000	1.000	1.000
226	8.674	0.796	4.919	100	623.649	50.676	15.945	2.703	1.645	0.608	0.864
227	1.826	1.000	1.911	100	802.703	47.973	135.000	1.351	1.000	1.000	1.000
228	2.283	1.000	2.436	100	26.351	50.676	56.310	1.351	1.553	0.644	0.909
229	0.457	1.000	0.956	100	32.432	48.649	135.000	0.676	1.000	1.000	1.000
230	0.913	1.000	1.511	100	129.730	48.649	153.435	0.676	2.000	0.500	1.000
231	0.913	0.785	1.911	100	366.892	50.000	45.000	0.956	2.646	0.378	0.667
232	0.913	1.000	1.511	100	409.459	48.649	153.435	0.676	2.000	0.500	1.000
233	0.913	1.000	1.511	100	708.108	48.649	116.565	0.676	2.000	0.500	1.000
234	2.283	0.764	3.022	100	178.378	49.324	153.435	1.351	2.610	0.383	0.769
235	2.283	0.674	3.022	100	381.757	49.324	153.435	1.351	2.749	0.364	0.769
236	21.914	0.404	11.800	100	634.459	49.324	156.371	3.534	4.370	0.229	0.701
237	0.457	1.000	0.956	100	758.784	49.324	135.000	0.676	1.000	1.000	1.000
238	2.739	0.916	3.022	100	859.459	49.324	153.435	1.351	2.082	0.480	0.857
239	0.457	1.000	0.956	100	864.189	49.324	135.000	0.676	1.000	1.000	1.000
240	0.457	1.000	0.956	100	387.162	50.000	135.000	0.676	1.000	1.000	1.000
241	0.457	1.000	0.956	100	458.784	50.000	135.000	0.676	1.000	1.000	1.000
242	9.587	0.568	6.229	100	773.649	51.351	167.471	2.994	2.656	0.376	0.677
243	0.457	1.000	0.956	100	19.595	50.676	135.000	0.676	1.000	1.000	1.000
244	0.913	1.000	1.511	100	37.838	50.676	153.435	0.676	2.000	0.500	1.000
245	2.739	1.000	2.436	100	484.459	50.676	146.310	1.351	1.500	0.667	1.000
246	0.913	1.000	1.511	100	151.351	51.351	116.565	0.676	2.000	0.500	1.000
247	0.913	1.000	1.511	100	664.189	51.351	153.435	0.676	2.000	0.500	1.000
248	1.826	1.000	2.436	100	708.108	52.703	33.690	1.351	2.000	0.500	0.800
249	4.109	0.726	3.639	100	690.541	54.054	21.801	2.027	1.707	0.586	0.750
250	1.826	0.857	2.436	100	701.351	52.027	146.310	1.351	2.000	0.500	0.800
251	0.457	1.000	0.956	100	109.459	52.703	135.000	0.676	1.000	1.000	1.000
252	0.913	1.000	1.511	100	148.649	52.703	153.435	0.676	2.000	0.500	1.000
253	1.826	0.857	2.436	100	187.838	52.703	146.310	1.351	2.000	0.500	0.800
254	4.109	0.638	4.326	100	387.838	52.703	128.660	2.117	2.778	0.360	0.643
255	0.457	1.000	0.956	100	840.541	52.703	135.000	0.676	1.000	1.000	1.000
256	0.457	1.000	0.956	100	150.676	53.378	135.000	0.676	1.000	1.000	1.000
257	0.457	1.000	0.956	100	158.108	53.378	135.000	0.676	1.000	1.000	1.000
258	1.826	1.000	2.137	100	370.270	53.378	161.565	1.351	1.468	0.681	0.800
259	36.523	0.436	14.205	100	697.297	54.054	154.654	5.744	2.842	0.352	0.734
260	0.457	1.000	0.956	100	814.189	53.378	135.000	0.676	1.000	1.000	1.000
261	0.457	1.000	0.956	100	857.432	53.378	135.000	0.676	1.000	1.000	1.000
262	0.457	1.000	0.956	100	191.892	54.054	135.000	0.676	1.000	1.000	1.000
263	0.457	1.000	0.956	100	374.324	54.054	135.000	0.676	1.000	1.000	1.000
264	0.457	1.000	0.956	100	420.946	54.054	135.000	0.676	1.000	1.000	1.000
265	4.109	0.539	4.533	100	743.243	56.081	26.565	1.640	3.665	0.273	0.692
266	1.370	1.000	1.911	100	22.973	56.081	45.000	1.351	1.464	0.683	0.857
267	3.196	0.621	3.639	100	835.811	54.730	158.199	1.351	2.658	0.376	0.778
268	224.617	0.207	34.611	100	524.324	55.405	141.340	20.339	1.872	0.534	0.544
269	0.457	1.000	0.956	100	789.189	55.405	135.000	0.676	1.000	1.000	1.000
270	3.196	0.800	3.022	100	156.757	56.081	116.565	1.814	1.895	0.528	0.737
271	2.283	1.000	2.436	100	235.135	56.081	146.310	1.351	1.553	0.644	0.909
272	1.370	0.809	2.137	100	839.865	56.081	108.435	0.676	3.000	0.333	1.000
273	41.088	0.370	12.330	98.889	22.973	56.757	99.462	8.307	1.794	0.557	0.602
274	0.913	0.785	1.911	100	329.054	58.108	45.000	0.956	2.646	0.378	0.667
275	0.913	1.000	1.511	100	345.946	56.757	153.435	0.676	2.000	0.500	1.000
276	0.913	1.000	1.511	100	556.757	56.757	153.435	0.676	2.000	0.500	1.000
277	2.283	0.873	2.867	100	650.676	58.784	45.000	1.814	1.882	0.531	0.714
278	1.826	0.857	2.436	100	758.108	57.432	123.690	1.351	2.000	0.500	0.800
279	0.913	1.000	1.511	100	789.189	57.432	153.435	0.676	2.000	0.500	1.000
280	1.370	1.000	1.911	100	327.027	58.108	135.000	1.351	1.464	0.683	0.857
281	4.109	0.585	3.378	100	345.946	58.108	143.130	2.703	1.190	0.840	0.692
282	1.370	1.000	1.911	100	750.676	59.459	45.000	1.351	1.464	0.683	0.857
283	1.826	0.740	2.786	100	859.459	58.108	165.964	0.676	4.000	0.250	1.000
284	0.913	1.000	1.511	100	236.486	58.784	153.435	0.676	2.000	0.500	1.000
285	0.457	1.000	0.956	100	270.946	58.784	135.000	0.676	1.000	1.000	1.000
286	10.957	0.743	4.872	100	643.243	62.838	56.310	4.054	1.179	0.848	0.800
287	0.457	1.000	0.956	100	839.189	58.784	135.000	0.676	1.000	1.000	1.000
288	0.457	1.000	0.956	100	162.162	59.459	135.000	0.676	1.000	1.000	1.000
289	0.457	1.000	0.956	100	194.595	59.459	135.000	0.676	1.000	1.000	1.000
290	2.739	0.809	3.022	100	290.541	59.459	153.435	1.351	2.237	0.447	0.857
291	0.913	1.000	1.511	100	342.568	59.459	153.435	0.676	2.000	0.500	1.000
292	1.370	0.967	2.137	100	271.622	60.135	161.565	0.676	3.000	0.333	1.000
293	30.131	0.763	9.065	100	583.108	64.189	26.565	5.222	1.844	0.542	0.857
294	0.457	1.000	0.956	100	648.649	60.135	135.000	0.676	1.000	1.000	1.000
295	3.196	0.621	3.445	100	858.108	60.135	168.690	1.351	2.243	0.446	0.778
296	1.826	0.513	3.378	100	275.000	60.811	143.130	1.316	3.850	0.260	0.571
297	0.913	1.000	1.511	100	763.514	60.811	153.435	0.676	2.000	0.500	1.000
298	1.370	1.000	1.911	100	854.730	62.162	45.000	1.351	1.464	0.683	0.857
299	0.913	1.000	1.511	100	272.297	61.486	153.435	0.676	2.000	0.500	1.000
300	70.763	0.223	16.495	100	629.730	73.649	34.992	10.055	1.893	0.528	0.565
301	0.457	1.000	0.956	100	837.838	62.162	135.000	0.676	1.000	1.000	1.000
302	1.826	0.857	2.137	100	843.243	62.162	108.435	1.351	1.468	0.681	0.800
303	605.369	0.236	57.432	100	224.324	119.595	81.203	27.679	2.309	0.433	0.599
304	1.370	0.967	2.137	100	473.649	62.838	161.565	0.676	3.000	0.333	1.000
305	4.565	0.536	4.273	100	865.541	62.838	108.435	2.524	1.935	0.517	0.606
306	2.283	1.000	2.436	100	778.378	64.189	146.310	1.351	1.553	0.644	0.909
307	8.218	0.498	6.410	100	118.919	64.865	161.565	2.703	2.316	0.432	0.679
308	0.457	1.000	0.956	100	167.568	64.865	135.000	0.676	1.000	1.000	1.000
309	0.913	1.000	1.511	100	391.892	64.865	153.435	0.676	2.000	0.500	1.000
310	7.761	0.911	4.273	100	695.946	68.919	71.565	2.703	1.367	0.731	0.850
311	0.913	1.000	1.511	100	843.243	64.865	153.435	0.676	2.000	0.500	1.000
312	2.283	1.000	2.436	100	845.946	66.892	56.310	1.351	1.553	0.644	0.909
313	0.913	0.785	1.911	100	177.703	65.541	135.000	0.956	2.646	0.378	0.667
314	2.739	1.000	2.867	100	262.838	65.541	135.000	1.814	1.809	0.553	0.800
315	0.457	1.000	0.956	100	362.162	65.541	135.000	0.676	1.000	1.000	1.000
316	2.283	1.000	2.436	100	473.649	65.541	123.690	1.351	1.553	0.644	0.909
317	4.565	1.000	3.022	100	577.027	66.216	153.435	2.027	1.236	0.809	0.909
318	0.913	1.000	1.511	100	721.622	65.541	153.435	0.676	2.000	0.500	1.000
319	3.196	0.419	3.022	100	165.541	66.892	153.435	2.027	1.169	0.855	0.667
320	0.913	1.000	1.511	100	175.000	66.892	116.565	0.676	2.000	0.500	1.000
321	2.283	0.873	2.867	100	97.297	69.595	45.000	1.433	2.308	0.433	0.769
322	1.370	0.967	2.137	100	162.838	67.568	161.565	0.676	3.000	0.333	1.000
323	5.478	0.851	3.445	100	743.243	68.243	168.690	2.703	1.219	0.820	0.750
324	4.109	0.923	3.378	100	752.703	69.595	36.870	2.027	1.758	0.569	0.857
325	1.826	0.740	2.786	100	135.811	68.243	165.964	0.676	4.000	0.250	1.000
326	3.196	0.455	3.822	100	264.189	68.243	135.000	2.389	1.874	0.534	0.609
327	1.370	1.000	1.911	100	281.081	69.595	45.000	1.351	1.464	0.683	0.857
328	0.457	1.000	0.956	100	722.297	68.243	135.000	0.676	1.000	1.000	1.000
329	0.913	1.000	1.511	100	756.757	68.243	116.565	0.676	2.000	0.500	1.000
330	0.913	1.000	1.511	100	162.162	68.919	153.435	0.676	2.000	0.500	1.000
331	2.739	0.615	3.639	100	167.568	70.270	21.801	1.351	3.254	0.307	0.750
332	9.587	0.393	7.554	100	272.297	69.595	169.695	2.027	3.288	0.304	0.764
333	2.283	0.444	3.445	100	267.568	70.270	168.690	1.351	2.645	0.378	0.588
334	0.457	1.000	0.956	100	393.919	69.595	135.000	0.676	1.000	1.000	1.000
335	2.739	0.615	3.639	100	472.297	70.946	21.801	1.351	3.254	0.307	0.750
336	1.826	0.698	2.867	100	95.270	72.297	45.000	1.433	2.654	0.377	0.667
337	0.457	1.000	0.956	100	162.162	70.270	135.000	0.676	1.000	1.000	1.000
338	1.826	0.857	2.137	100	172.973	70.270	108.435	1.351	1.468	0.681	0.800
339	0.457	1.000	0.956	100	627.027	70.270	135.000	0.676	1.000	1.000	1.000
340	15.522	0.630	6.410	100	108.784	70.946	108.435	4.488	1.347	0.742	0.747
341	0.457	1.000	0.956	100	192.568	70.946	135.000	0.676	1.000	1.000	1.000
342	4.109	0.272	4.326	100	311.486	74.324	38.660	2.951	1.755	0.570	0.409
343	0.913	1.000	1.511	100	766.216	70.946	153.435	0.676	2.000	0.500	1.000
344	2.283	0.764	3.022	100	475.000	73.649	26.565	1.351	2.610	0.383	0.769
345	0.913	0.785	1.911	100	981.081	73.649	45.000	0.956	2.646	0.378	0.667
346	0.913	1.000	1.511	100	154.730	72.973	153.435	0.676	2.000	0.500	1.000
347	0.913	1.000	1.511	100	172.973	72.973	116.565	0.676	2.000	0.500	1.000
348	0.913	1.000	1.511	100	746.622	72.973	153.435	0.676	2.000	0.500	1.000
349	1.826	1.000	1.911	100	813.514	72.973	135.000	1.351	1.000	1.000	1.000
350	0.913	1.000	1.511	100	1062.162	72.973	153.435	0.676	2.000	0.500	1.000
351	2.739	0.916	3.022	100	6.081	75.000	26.565	1.351	2.237	0.447	0.857
352	0.457	1.000	0.956	100	156.757	73.649	135.000	0.676	1.000	1.000	1.000
353	1.370	1.000	1.911	100	367.568	75.000	45.000	1.351	1.464	0.683	0.857
354	2.283	0.764	3.022	100	992.568	75.000	26.565	1.351	2.610	0.383	0.769
355	2.283	0.513	3.639	100	1010.811	73.649	158.199	1.284	4.051	0.247	0.667
356	1.370	0.754	2.436	100	1015.541	73.649	146.310	1.209	2.702	0.370	0.667
357	1.826	0.645	2.786	100	394.595	74.324	104.036	0.676	4.000	0.250	1.000
358	2.739	0.916	3.022	100	1060.811	75.676	26.565	1.351	2.082	0.480	0.857
359	0.457	1.000	0.956	100	1064.865	74.324	135.000	0.676	1.000	1.000	1.000
360	0.457	1.000	0.956	100	93.243	75.676	135.000	0.676	1.000	1.000	1.000
361	0.457	1.000	0.956	100	707.432	75.676	135.000	0.676	1.000	1.000	1.000
362	0.457	1.000	0.956	100	766.892	75.676	135.000	0.676	1.000	1.000	1.000
363	3.652	0.539	4.273	100	1110.811	77.027	18.435	1.351	3.759	0.266	0.800
364	1.826	1.000	1.911	100	718.919	76.351	135.000	1.351	1.000	1.000	1.000
365	0.457	1.000	0.956	100	528.378	77.027	135.000	0.676	1.000	1.000	1.000
366	1.370	0.967	2.137	100	1034.459	77.027	161.565	0.676	3.000	0.333	1.000
367	1.370	1.000	1.911	100	1037.162	78.378	45.000	1.351	1.464	0.683	0.857
368	0.457	1.000	0.956	100	172.973	77.703	135.000	0.676	1.000	1.000	1.000
369	1.370	0.967	2.137	100	1108.108	77.703	161.565	0.676	3.000	0.333	1.000
370	1.370	1.000	1.911	100	1097.297	79.730	45.000	1.351	1.464	0.683	0.857
371	6.848	0.524	4.919	100	259.459	83.784	74.055	2.703	2.007	0.498	0.667
372	0.913	1.000	1.511	100	710.135	79.054	153.435	0.676	2.000	0.500	1.000
373	0.457	1.000	0.956	100	760.135	79.054	135.000	0.676	1.000	1.000	1.000
374	15.066	0.803	6.043	100	1037.838	84.459	63.435	4.054	1.237	0.808	0.857
375	0.457	1.000	0.956	100	1102.027	79.054	135.000	0.676	1.000	1.000	1.000
376	4.109	0.799	3.022	100	93.243	79.730	116.565	2.027	1.354	0.739	0.818
377	0.913	1.000	1.511	100	752.703	79.730	116.565	0.676	2.000	0.500	1.000
378	8.674	0.725	4.533	100	112.162	80.405	116.565	3.378	1.554	0.644	0.760
379	9.131	0.513	5.812	100	117.568	85.135	54.462	2.994	2.269	0.441	0.714
380	5.022	0.394	6.043	100	121.622	83.108	26.565	2.117	3.849	0.260	0.595
381	27.849	0.735	8.248	100	316.216	81.081	124.992	5.256	1.634	0.612	0.813
382	13.696	0.634	5.733	96.667	527.027	85.135	45.000	4.702	1.136	0.880	0.759
383	0.913	1.000	1.511	100	735.135	80.405	116.565	0.676	2.000	0.500	1.000
384	0.913	1.000	1.511	100	162.162	81.081	153.435	0.676	2.000	0.500	1.000
385	1.370	0.967	2.137	100	172.297	81.081	161.565	0.676	3.000	0.333	1.000
386	1.370	1.000	1.911	100	455.405	81.081	135.000	1.351	1.464	0.683	0.857
387	2.739	0.809	2.786	100	522.297	81.081	104.036	1.351	1.809	0.553	0.857
388	0.457	1.000	0.956	100	47.973	81.757	135.000	0.676	1.000	1.000	1.000
389	0.457	1.000	0.956	100	156.757	81.757	135.000	0.676	1.000	1.000	1.000
390	0.457	1.000	0.956	100	752.703	81.757	135.000	0.676	1.000	1.000	1.000
391	0.913	1.000	1.511	100	1081.081	81.757	153.435	0.676	2.000	0.500	1.000
392	0.913	0.785	1.911	100	1102.027	83.108	45.000	0.956	2.646	0.378	0.667
393	0.457	1.000	0.956	100	152.703	82.432	135.000	0.676	1.000	1.000	1.000
394	0.457	1.000	0.956	100	158.108	82.432	135.000	0.676	1.000	1.000	1.000
395	1.370	1.000	1.911	100	765.541	83.784	45.000	1.351	1.464	0.683	0.857
396	0.913	1.000	1.511	100	767.568	82.432	116.565	0.676	2.000	0.500	1.000
397	0.457	1.000	0.956	100	1140.541	82.432	135.000	0.676	1.000	1.000	1.000
398	9.587	0.350	9.090	100	40.541	89.189	41.987	2.173	6.591	0.152	0.583
399	0.913	1.000	1.511	100	55.405	83.108	116.565	0.676	2.000	0.500	1.000
400	0.913	1.000	1.511	100	95.946	83.108	153.435	0.676	2.000	0.500	1.000
401	0.457	1.000	0.956	100	752.703	83.108	135.000	0.676	1.000	1.000	1.000
402	0.457	1.000	0.956	100	762.162	83.108	135.000	0.676	1.000	1.000	1.000
403	0.913	1.000	1.511	100	834.459	83.108	153.435	0.676	2.000	0.500	1.000
404	3.196	0.687	3.822	100	991.216	83.108	135.000	1.690	2.959	0.338	0.667
405	0.457	1.000	0.956	100	745.270	83.784	135.000	0.676	1.000	1.000	1.000
406	1.370	0.643	2.436	100	381.081	86.486	56.310	1.209	2.702	0.370	0.667
407	6.848	0.804	3.940	100	478.378	84.459	149.036	2.703	1.392	0.718	0.833
408	0.913	1.000	1.511	100	1128.378	84.459	153.435	0.676	2.000	0.500	1.000
409	2.739	0.916	2.436	100	91.892	85.135	123.690	2.027	1.124	0.890	0.800
410	1.826	0.857	2.137	100	306.081	85.135	108.435	1.351	1.468	0.681	0.800
411	0.457	1.000	0.956	100	456.081	85.135	135.000	0.676	1.000	1.000	1.000
412	0.457	1.000	0.956	100	607.432	85.135	135.000	0.676	1.000	1.000	1.000
413	0.457	1.000	0.956	100	610.135	85.135	135.000	0.676	1.000	1.000	1.000
414	0.913	1.000	1.511	100	352.703	85.811	153.435	0.676	2.000	0.500	1.000
415	1.370	1.000	1.911	100	1036.486	85.811	135.000	1.351	1.464	0.683	0.857
416	0.457	1.000	0.956	100	178.378	86.486	135.000	0.676	1.000	1.000	1.000
417	0.457	1.000	0.956	100	335.135	86.486	135.000	0.676	1.000	1.000	1.000
418	0.457	1.000	0.956	100	356.757	86.486	135.000	0.676	1.000	1.000	1.000
419	0.457	1.000	0.956	100	605.405	86.486	135.000	0.676	1.000	1.000	1.000
420	0.457	1.000	0.956	100	1107.432	86.486	135.000	0.676	1.000	1.000	1.000
421	3.196	0.496	4.326	100	134.459	90.541	51.340	1.876	3.102	0.322	0.609
422	0.913	1.000	1.511	100	608.108	87.162	153.435	0.676	2.000	0.500	1.000
423	0.913	1.000	1.511	100	113.514	87.838	116.565	0.676	2.000	0.500	1.000
424	1.370	0.967	2.137	100	302.703	87.838	161.565	0.676	3.000	0.333	1.000
425	0.457	1.000	0.956	100	734.459	87.838	135.000	0.676	1.000	1.000	1.000
426	0.913	1.000	1.511	100	993.919	87.838	153.435	0.676	2.000	0.500	1.000
427	0.457	1.000	0.956	100	159.459	88.514	135.000	0.676	1.000	1.000	1.000
428	0.457	1.000	0.956	100	827.027	88.514	135.000	0.676	1.000	1.000	1.000
429	1.370	0.754	2.436	100	915.541	88.514	146.310	1.209	2.702	0.370	0.667
430	2.283	0.764	3.022	100	361.486	89.189	153.435	1.351	2.610	0.383	0.769
431	0.913	1.000	1.511	100	590.541	89.189	153.435	0.676	2.000	0.500	1.000
432	1.826	0.857	2.436	100	1000.000	89.189	146.310	1.351	2.000	0.500	0.800
433	7.305	0.429	6.891	100	250.000	89.865	168.690	1.351	5.051	0.198	0.889
434	0.457	1.000	0.956	100	573.649	89.865	135.000	0.676	1.000	1.000	1.000
435	3.652	0.710	3.822	100	733.784	89.865	135.000	2.063	2.310	0.433	0.696
436	0.457	1.000	0.956	100	1107.432	89.865	135.000	0.676	1.000	1.000	1.000
437	0.457	1.000	0.956	100	148.649	90.541	135.000	0.676	1.000	1.000	1.000
438	0.457	1.000	0.956	100	202.703	90.541	135.000	0.676	1.000	1.000	1.000
439	0.457	1.000	0.956	100	296.622	90.541	135.000	0.676	1.000	1.000	1.000
440	0.457	1.000	0.956	100	872.297	90.541	135.000	0.676	1.000	1.000	1.000
441	0.457	1.000	0.956	100	1004.730	90.541	135.000	0.676	1.000	1.000	1.000
442	1.370	0.754	2.436	100	1018.919	91.892	33.690	1.209	2.702	0.370	0.667
443	0.457	1.000	0.956	100	150.000	91.216	135.000	0.676	1.000	1.000	1.000
444	2.283	0.513	3.639	100	246.622	92.568	21.801	1.284	4.051	0.247	0.667
445	0.457	1.000	0.956	100	344.595	91.216	135.000	0.676	1.000	1.000	1.000
446	0.457	1.000	0.956	100	427.027	91.216	135.000	0.676	1.000	1.000	1.000
447	0.457	1.000	0.956	100	81.081	91.892	135.000	0.676	1.000	1.000	1.000
448	0.913	1.000	1.511	100	345.946	91.892	116.565	0.676	2.000	0.500	1.000
449	0.457	1.000	0.956	100	583.784	91.892	135.000	0.676	1.000	1.000	1.000
450	0.913	1.000	1.511	100	615.541	91.892	153.435	0.676	2.000	0.500	1.000
451	0.457	1.000	0.956	100	1001.351	91.892	135.000	0.676	1.000	1.000	1.000
452	13.696	0.496	8.358	100	93.919	95.270	14.036	2.703	3.770	0.265	0.741
453	95.873	0.145	32.503	100	170.270	115.541	43.315	8.122	5.604	0.178	0.499
454	5.478	0.272	7.554	100	75.000	96.622	26.565	1.696	6.571	0.152	0.533
455	0.457	1.000	0.956	100	194.595	93.243	135.000	0.676	1.000	1.000	1.000
456	0.913	1.000	1.511	100	331.081	93.243	153.435	0.676	2.000	0.500	1.000
457	0.457	1.000	0.956	100	345.946	94.595	135.000	0.676	1.000	1.000	1.000
458	1.826	0.611	3.022	100	90.541	96.622	26.565	1.284	3.093	0.323	0.667
459	0.913	1.000	1.511	100	805.405	95.270	153.435	0.676	2.000	0.500	1.000
460	2.283	1.000	2.436	100	116.892	97.973	33.690	1.351	1.553	0.644	0.909
461	4.565	0.449	5.447	100	84.459	100.000	29.745	1.816	3.922	0.255	0.625
462	0.457	1.000	0.956	100	280.405	97.297	135.000	0.676	1.000	1.000	1.000
463	0.457	1.000	0.956	100	451.351	97.297	135.000	0.676	1.000	1.000	1.000
464	0.457	1.000	0.956	100	627.027	97.297	135.000	0.676	1.000	1.000	1.000
465	20.088	0.345	9.838	100	489.189	102.703	15.945	3.935	2.878	0.347	0.638
466	0.913	1.000	1.511	100	66.892	98.649	153.435	0.676	2.000	0.500	1.000
467	0.457	1.000	0.956	100	156.757	98.649	135.000	0.676	1.000	1.000	1.000
468	5.022	0.448	5.447	100	363.514	98.649	150.255	1.971	3.898	0.257	0.595
469	0.457	1.000	0.956	100	408.784	98.649	135.000	0.676	1.000	1.000	1.000
470	0.457	1.000	0.956	100	435.811	98.649	135.000	0.676	1.000	1.000	1.000
471	0.913	0.785	1.911	100	741.892	100.000	45.000	0.956	2.646	0.378	0.667
472	0.913	1.000	1.511	100	810.811	98.649	153.435	0.676	2.000	0.500	1.000
473	1.826	0.857	2.436	100	508.108	101.351	56.310	1.351	2.031	0.492	0.800
474	0.457	1.000	0.956	100	615.541	99.324	135.000	0.676	1.000	1.000	1.000
475	0.457	1.000	0.956	100	627.027	99.324	135.000	0.676	1.000	1.000	1.000
476	0.913	1.000	1.511	100	869.595	99.324	153.435	0.676	2.000	0.500	1.000
477	0.457	1.000	0.956	100	1079.054	99.324	135.000	0.676	1.000	1.000	1.000
478	0.457	1.000	0.956	100	316.216	100.000	135.000	0.676	1.000	1.000	1.000
479	0.457	1.000	0.956	100	415.541	100.000	135.000	0.676	1.000	1.000	1.000
480	0.913	1.000	1.511	100	434.459	100.000	153.435	0.676	2.000	0.500	1.000
481	0.457	1.000	0.956	100	594.595	100.000	135.000	0.676	1.000	1.000	1.000
482	48.850	0.612	12.997	87.850	389.189	102.027	171.027	6.081	2.207	0.453	0.805
483	0.913	0.785	1.911	100	22.973	102.703	45.000	0.956	2.646	0.378	0.667
484	1.370	1.000	1.911	100	291.216	102.703	45.000	1.351	1.464	0.683	0.857
485	1.370	0.643	2.436	100	501.351	101.351	123.690	1.209	2.702	0.370	0.667
486	0.913	1.000	1.511	100	591.216	101.351	116.565	0.676	2.000	0.500	1.000
487	0.457	1.000	0.956	100	858.784	101.351	135.000	0.676	1.000	1.000	1.000
488	3.652	1.000	3.378	100	443.243	102.027	143.130	1.911	1.939	0.516	0.842
489	0.913	1.000	1.511	100	534.459	102.027	153.435	0.676	2.000	0.500	1.000
490	5.478	0.404	5.773	100	158.108	102.703	110.556	2.044	3.666	0.273	0.615
491	0.913	1.000	1.511	100	296.622	103.378	116.565	0.676	2.000	0.500	1.000
492	0.457	1.000	0.956	100	336.486	103.378	135.000	0.676	1.000	1.000	1.000
493	0.457	1.000	0.956	100	534.459	103.378	135.000	0.676	1.000	1.000	1.000
494	1.370	0.967	2.137	100	558.784	104.054	161.565	0.676	3.000	0.333	1.000
495	0.913	1.000	1.511	100	589.865	104.730	153.435	0.676	2.000	0.500	1.000
496	2.283	1.000	2.436	100	97.297	106.757	33.690	1.351	1.553	0.644	0.909
497	0.457	1.000	0.956	100	405.405	105.405	135.000	0.676	1.000	1.000	1.000
498	0.913	1.000	1.511	100	537.838	105.405	153.435	0.676	2.000	0.500	1.000
499	1.826	0.740	2.786	100	564.865	105.405	165.964	0.676	4.000	0.250	1.000
500	2.739	0.686	3.378	100	568.243	105.405	126.870	1.498	2.763	0.362	0.667
501	0.913	1.000	1.511	100	577.027	105.405	153.435	0.676	2.000	0.500	1.000
502	0.457	1.000	0.956	100	920.270	105.405	135.000	0.676	1.000	1.000	1.000
503	0.457	1.000	0.956	100	283.784	106.081	135.000	0.676	1.000	1.000	1.000
504	0.913	1.000	1.511	100	409.459	106.081	153.435	0.676	2.000	0.500	1.000
505	0.457	1.000	0.956	100	659.459	106.081	135.000	0.676	1.000	1.000	1.000
506	0.457	1.000	0.956	100	1042.568	106.081	135.000	0.676	1.000	1.000	1.000
507	2.739	0.809	3.022	100	75.676	106.757	153.435	1.351	2.237	0.447	0.857
508	3.652	0.710	3.822	100	1029.054	106.757	135.000	1.911	2.429	0.412	0.762
509	2.283	1.000	2.436	100	1051.351	108.108	33.690	1.351	1.553	0.644	0.909
510	0.457	1.000	0.956	100	1054.054	106.757	135.000	0.676	1.000	1.000	1.000
511	0.913	1.000	1.511	100	597.297	107.432	153.435	0.676	2.000	0.500	1.000
512	4.565	0.536	4.872	100	577.703	108.108	146.310	2.389	2.637	0.379	0.606
513	0.457	1.000	0.956	100	604.730	108.108	135.000	0.676	1.000	1.000	1.000
514	0.457	1.000	0.956	100	623.649	108.108	135.000	0.676	1.000	1.000	1.000
515	0.457	1.000	0.956	100	1091.892	108.108	135.000	0.676	1.000	1.000	1.000
516	2.283	0.674	3.022	100	75.676	110.135	26.565	1.351	2.749	0.364	0.769
517	2.283	0.536	3.445	100	112.838	108.784	101.310	0.676	5.000	0.200	1.000
518	0.457	1.000	0.956	100	410.811	108.784	135.000	0.676	1.000	1.000	1.000
519	0.913	1.000	1.511	100	581.757	108.784	153.435	0.676	2.000	0.500	1.000
520	0.457	1.000	0.956	100	1140.541	108.784	135.000	0.676	1.000	1.000	1.000
521	0.457	1.000	0.956	100	71.622	109.459	135.000	0.676	1.000	1.000	1.000
522	11.413	0.821	5.146	100	158.784	114.189	66.801	3.628	1.603	0.624	0.781
523	1.826	1.000	1.911	100	536.486	109.459	135.000	1.351	1.000	1.000	1.000
524	0.913	1.000	1.511	100	568.919	109.459	116.565	0.676	2.000	0.500	1.000
525	2.283	0.491	3.822	100	550.000	110.135	135.000	1.433	3.986	0.251	0.588
526	0.457	1.000	0.956	100	1043.243	110.135	135.000	0.676	1.000	1.000	1.000
527	0.457	1.000	0.956	100	572.973	110.811	135.000	0.676	1.000	1.000	1.000
528	0.457	1.000	0.956	100	853.378	110.811	135.000	0.676	1.000	1.000	1.000
529	5.478	0.664	4.919	100	1032.432	112.162	15.945	1.351	3.377	0.296	0.923
530	0.913	1.000	1.511	100	1037.838	110.811	153.435	0.676	2.000	0.500	1.000
531	35.153	0.434	13.929	100	443.243	111.486	104.036	4.262	3.838	0.261	0.786
532	1.826	0.857	2.137	100	540.541	111.486	108.435	1.351	1.468	0.681	0.800
533	0.457	1.000	0.956	100	593.919	111.486	135.000	0.676	1.000	1.000	1.000
534	1.370	0.754	2.436	100	643.243	111.486	146.310	1.209	2.702	0.370	0.667
535	8.674	0.725	5.447	100	568.919	112.162	119.745	2.703	2.062	0.485	0.792
536	3.196	0.621	3.940	100	579.730	114.189	30.964	1.814	2.863	0.349	0.667
537	8.218	0.808	5.277	100	206.081	116.892	50.194	2.814	2.280	0.439	0.800
538	0.457	1.000	0.956	100	549.324	112.838	135.000	0.676	1.000	1.000	1.000
539	0.457	1.000	0.956	100	583.784	112.838	135.000	0.676	1.000	1.000	1.000
540	0.913	1.000	1.511	100	727.027	112.838	153.435	0.676	2.000	0.500	1.000
541	0.457	1.000	0.956	100	938.514	112.838	135.000	0.676	1.000	1.000	1.000
542	0.913	1.000	1.511	100	1029.054	112.838	153.435	0.676	2.000	0.500	1.000
543	0.457	1.000	0.956	100	1118.243	112.838	135.000	0.676	1.000	1.000	1.000
544	0.457	1.000	0.956	100	554.054	113.514	135.000	0.676	1.000	1.000	1.000
545	0.457	1.000	0.956	100	820.946	113.514	135.000	0.676	1.000	1.000	1.000
546	28.305	0.466	10.292	100	118.919	114.189	156.801	5.772	1.737	0.576	0.738
547	1.370	1.000	1.911	100	287.162	114.189	135.000	1.351	1.464	0.683	0.857
548	2.283	1.000	2.436	100	583.784	114.189	123.690	1.351	1.553	0.644	0.909
549	0.457	1.000	0.956	100	727.703	114.189	135.000	0.676	1.000	1.000	1.000
550	3.196	0.455	3.378	100	1116.892	114.189	143.130	2.027	1.663	0.601	0.700
551	0.913	1.000	1.511	100	899.324	114.865	153.435	0.676	2.000	0.500	1.000
552	0.457	1.000	0.956	100	832.432	115.541	135.000	0.676	1.000	1.000	1.000
553	0.457	1.000	0.956	100	156.081	116.216	135.000	0.676	1.000	1.000	1.000
554	0.457	1.000	0.956	100	727.703	116.216	135.000	0.676	1.000	1.000	1.000
555	1.370	1.000	1.911	100	424.324	116.892	135.000	1.351	1.464	0.683	0.857
556	0.457	1.000	0.956	100	551.351	116.892	135.000	0.676	1.000	1.000	1.000
557	0.913	1.000	1.511	100	821.622	116.892	153.435	0.676	2.000	0.500	1.000
558	0.457	1.000	0.956	100	54.054	117.568	135.000	0.676	1.000	1.000	1.000
559	0.913	1.000	1.511	100	1118.919	117.568	153.435	0.676	2.000	0.500	1.000
560	0.913	1.000	1.511	100	577.703	118.243	153.435	0.676	2.000	0.500	1.000
561	0.457	1.000	0.956	100	729.730	118.243	135.000	0.676	1.000	1.000	1.000
562	0.913	1.000	1.511	100	866.216	118.243	153.435	0.676	2.000	0.500	1.000
563	34.697	0.335	15.832	98.684	197.973	129.054	39.806	5.146	4.376	0.229	0.620
564	2.283	1.000	2.436	100	212.162	118.919	146.310	1.351	1.553	0.644	0.909
565	1.826	1.000	2.137	100	483.784	119.595	161.565	1.351	1.468	0.681	0.800
566	0.457	1.000	0.956	100	731.757	118.919	135.000	0.676	1.000	1.000	1.000
567	0.457	1.000	0.956	100	896.622	119.595	135.000	0.676	1.000	1.000	1.000
568	4.565	0.392	5.572	100	917.568	120.946	14.036	1.803	4.212	0.237	0.625
569	0.913	1.000	1.511	100	1118.919	119.595	153.435	0.676	2.000	0.500	1.000
570	19.175	0.232	10.336	100	140.541	120.270	101.310	6.019	1.989	0.503	0.462
571	2.739	0.809	3.022	100	486.486	120.270	116.565	1.351	2.082	0.480	0.857
572	2.739	0.916	3.022	100	556.757	120.270	153.435	1.351	2.082	0.480	0.857
573	0.913	1.000	1.511	100	583.784	120.270	153.435	0.676	2.000	0.500	1.000
574	5.935	0.496	4.919	100	866.892	120.270	105.945	2.027	2.485	0.402	0.722
575	1.370	0.967	2.137	100	1012.162	120.270	161.565	0.676	3.000	0.333	1.000
576	5.478	0.643	4.778	100	87.838	124.324	45.000	2.299	2.578	0.388	0.706
577	3.196	0.543	3.022	100	575.676	120.946	116.565	2.027	1.499	0.667	0.636
578	0.457	1.000	0.956	100	605.405	120.946	135.000	0.676	1.000	1.000	1.000
579	1.826	1.000	2.137	100	612.838	120.946	161.565	1.351	1.468	0.681	0.800
580	0.457	1.000	0.956	100	1070.270	120.946	135.000	0.676	1.000	1.000	1.000
581	0.457	1.000	0.956	100	64.865	121.622	135.000	0.676	1.000	1.000	1.000
582	1.826	0.857	2.137	100	601.351	121.622	108.435	1.351	1.468	0.681	0.800
583	3.196	0.898	3.022	100	732.432	122.297	153.435	1.911	1.668	0.600	0.778
584	0.913	1.000	1.511	100	915.541	121.622	153.435	0.676	2.000	0.500	1.000
585	3.196	0.564	3.940	100	554.730	124.324	30.964	2.027	2.391	0.418	0.636
586	0.457	1.000	0.956	100	577.703	122.297	135.000	0.676	1.000	1.000	1.000
587	0.913	1.000	1.511	100	583.784	122.297	153.435	0.676	2.000	0.500	1.000
588	0.457	1.000	0.956	100	637.838	122.297	135.000	0.676	1.000	1.000	1.000
589	0.457	1.000	0.956	100	340.541	122.973	135.000	0.676	1.000	1.000	1.000
590	1.370	0.967	2.137	100	931.757	122.973	161.565	0.676	3.000	0.333	1.000
591	0.457	1.000	0.956	100	62.838	123.649	135.000	0.676	1.000	1.000	1.000
592	7.305	0.611	5.277	100	281.081	127.027	39.806	2.867	2.162	0.463	0.727
593	0.457	1.000	0.956	100	585.135	123.649	135.000	0.676	1.000	1.000	1.000
594	0.913	1.000	1.511	100	610.811	123.649	116.565	0.676	2.000	0.500	1.000
595	0.457	1.000	0.956	100	848.649	123.649	135.000	0.676	1.000	1.000	1.000
596	0.457	1.000	0.956	100	114.865	124.324	135.000	0.676	1.000	1.000	1.000
597	0.457	1.000	0.956	100	340.541	124.324	135.000	0.676	1.000	1.000	1.000
598	1.370	1.000	1.911	100	577.703	124.324	135.000	1.351	1.464	0.683	0.857
599	0.457	1.000	0.956	100	627.027	124.324	135.000	0.676	1.000	1.000	1.000
600	1.370	1.000	1.911	100	789.189	124.324	135.000	1.351	1.464	0.683	0.857
601	0.913	1.000	1.511	100	87.838	125.000	153.435	0.676	2.000	0.500	1.000
602	0.457	1.000	0.956	100	554.054	125.000	135.000	0.676	1.000	1.000	1.000
603	0.457	1.000	0.956	100	787.838	125.000	135.000	0.676	1.000	1.000	1.000
604	1.826	1.000	2.436	100	843.243	126.351	33.690	1.351	2.000	0.500	0.800
605	3.196	0.718	3.378	100	1021.622	127.703	53.130	2.027	1.918	0.521	0.778
606	0.913	1.000	1.511	100	850.000	126.351	116.565	0.676	2.000	0.500	1.000
607	1.826	0.857	2.436	100	991.892	126.351	146.310	1.351	2.000	0.500	0.800
608	0.913	1.000	1.511	100	81.081	127.027	153.435	0.676	2.000	0.500	1.000
609	11.413	0.328	8.220	100	474.324	129.054	9.462	3.378	2.536	0.394	0.602
610	8.218	0.451	7.183	100	734.459	127.027	131.186	2.389	4.021	0.249	0.600
611	1.370	0.754	2.436	100	815.541	127.027	146.310	1.209	2.702	0.370	0.667
612	0.457	1.000	0.956	100	922.973	127.027	135.000	0.676	1.000	1.000	1.000
613	2.739	0.555	3.639	100	924.324	127.027	158.199	1.351	3.550	0.282	0.750
614	0.913	1.000	1.511	100	1068.919	127.027	153.435	0.676	2.000	0.500	1.000
615	3.196	0.718	3.639	100	483.784	129.054	21.801	1.351	2.731	0.366	0.824
616	0.913	1.000	1.511	100	572.973	127.703	116.565	0.676	2.000	0.500	1.000
617	0.457	1.000	0.956	100	624.324	127.703	135.000	0.676	1.000	1.000	1.000
618	0.457	1.000	0.956	100	981.081	127.703	135.000	0.676	1.000	1.000	1.000
619	11.413	0.539	7.054	100	201.351	129.730	163.301	3.053	2.915	0.343	0.735
620	8.218	0.249	8.784	100	439.189	131.757	22.620	2.208	6.075	0.165	0.529
621	1.370	0.754	2.436	100	575.000	129.730	33.690	1.209	2.702	0.370	0.667
622	0.457	1.000	0.956	100	632.432	128.378	135.000	0.676	1.000	1.000	1.000
623	0.457	1.000	0.956	100	770.946	128.378	135.000	0.676	1.000	1.000	1.000
624	0.457	1.000	0.956	100	843.243	128.378	135.000	0.676	1.000	1.000	1.000
625	3.196	0.515	4.273	100	35.135	130.405	18.435	1.351	4.378	0.228	0.737
626	0.457	1.000	0.956	100	655.405	129.054	135.000	0.676	1.000	1.000	1.000
627	0.457	1.000	0.956	100	844.595	129.054	135.000	0.676	1.000	1.000	1.000
628	1.370	1.000	1.911	100	924.324	130.405	45.000	1.351	1.464	0.683	0.857
629	0.457	1.000	0.956	100	197.973	129.730	135.000	0.676	1.000	1.000	1.000
630	0.457	1.000	0.956	100	832.432	129.730	135.000	0.676	1.000	1.000	1.000
631	1.370	1.000	1.911	100	1020.946	129.730	135.000	1.351	1.464	0.683	0.857
632	5.478	0.809	4.273	100	1083.784	129.730	108.435	1.351	3.000	0.333	1.000
633	0.457	1.000	0.956	100	1137.838	129.730	135.000	0.676	1.000	1.000	1.000
634	40.632	0.464	14.819	100	459.459	136.486	24.228	5.440	3.333	0.300	0.718
635	0.913	1.000	1.511	100	572.973	130.405	153.435	0.676	2.000	0.500	1.000
636	1.370	0.754	2.436	100	858.784	131.757	33.690	1.209	2.702	0.370	0.667
637	0.457	1.000	0.956	100	862.162	130.405	135.000	0.676	1.000	1.000	1.000
638	0.457	1.000	0.956	100	882.432	130.405	135.000	0.676	1.000	1.000	1.000
639	0.913	1.000	1.511	100	140.541	131.081	116.565	0.676	2.000	0.500	1.000
640	0.457	1.000	0.956	100	169.595	131.081	135.000	0.676	1.000	1.000	1.000
641	0.457	1.000	0.956	100	916.892	131.081	135.000	0.676	1.000	1.000	1.000
642	0.457	1.000	0.956	100	1127.703	131.081	135.000	0.676	1.000	1.000	1.000
643	1.826	0.857	2.436	100	116.216	133.108	33.690	1.351	2.000	0.500	0.800
644	0.457	1.000	0.956	100	312.838	131.757	135.000	0.676	1.000	1.000	1.000
645	0.457	1.000	0.956	100	577.703	131.757	135.000	0.676	1.000	1.000	1.000
646	0.457	1.000	0.956	100	812.162	131.757	135.000	0.676	1.000	1.000	1.000
647	0.457	1.000	0.956	100	837.838	131.757	135.000	0.676	1.000	1.000	1.000
648	0.913	1.000	1.511	100	279.054	132.432	116.565	0.676	2.000	0.500	1.000
649	0.457	1.000	0.956	100	345.946	132.432	135.000	0.676	1.000	1.000	1.000
650	0.913	0.785	1.911	100	586.486	132.432	135.000	0.956	2.646	0.378	0.667
651	0.913	1.000	1.511	100	835.811	132.432	153.435	0.676	2.000	0.500	1.000
652	0.457	1.000	0.956	100	931.081	132.432	135.000	0.676	1.000	1.000	1.000
653	0.913	1.000	1.511	100	98.649	133.108	153.435	0.676	2.000	0.500	1.000
654	0.457	1.000	0.956	100	1135.135	133.108	135.000	0.676	1.000	1.000	1.000
655	0.913	1.000	1.511	100	30.405	133.784	153.435	0.676	2.000	0.500	1.000
656	5.478	0.404	5.773	100	434.459	139.189	69.444	1.890	3.798	0.263	0.649
657	0.457	1.000	0.956	100	588.514	133.784	135.000	0.676	1.000	1.000	1.000
658	0.457	1.000	0.956	100	621.622	133.784	135.000	0.676	1.000	1.000	1.000
659	0.913	1.000	1.511	100	651.351	133.784	153.435	0.676	2.000	0.500	1.000
660	0.457	1.000	0.956	100	1124.324	133.784	135.000	0.676	1.000	1.000	1.000
661	6.392	0.629	3.940	100	179.730	134.459	120.964	3.206	1.225	0.816	0.718
662	0.457	1.000	0.956	100	605.405	134.459	135.000	0.676	1.000	1.000	1.000
663	3.196	0.564	3.022	100	58.108	135.135	116.565	2.027	1.560	0.641	0.700
664	1.370	1.000	1.911	100	277.027	136.486	45.000	1.351	1.464	0.683	0.857
665	0.913	1.000	1.511	100	87.838	135.811	153.435	0.676	2.000	0.500	1.000
666	0.457	1.000	0.956	100	471.622	135.811	135.000	0.676	1.000	1.000	1.000
667	0.457	1.000	0.956	100	648.649	135.811	135.000	0.676	1.000	1.000	1.000
668	0.913	1.000	1.511	100	93.919	136.486	153.435	0.676	2.000	0.500	1.000
669	4.109	0.884	3.378	100	210.135	136.486	126.870	1.911	1.915	0.522	0.783
670	0.457	1.000	0.956	100	334.459	136.486	135.000	0.676	1.000	1.000	1.000
671	8.674	0.944	4.326	100	473.649	139.189	38.660	3.325	1.195	0.837	0.864
672	0.457	1.000	0.956	100	864.865	136.486	135.000	0.676	1.000	1.000	1.000
673	0.457	1.000	0.956	100	940.541	136.486	135.000	0.676	1.000	1.000	1.000
674	0.913	1.000	1.511	100	901.351	137.162	153.435	0.676	2.000	0.500	1.000
675	3.652	0.463	4.778	100	60.135	137.838	135.000	1.694	3.754	0.266	0.571
676	0.457	1.000	0.956	100	65.541	138.514	135.000	0.676	1.000	1.000	1.000
677	0.457	1.000	0.956	100	89.189	138.514	135.000	0.676	1.000	1.000	1.000
678	0.457	1.000	0.956	100	902.703	138.514	135.000	0.676	1.000	1.000	1.000
679	0.457	1.000	0.956	100	427.027	139.189	135.000	0.676	1.000	1.000	1.000
680	0.457	1.000	0.956	100	593.919	139.189	135.000	0.676	1.000	1.000	1.000
681	0.457	1.000	0.956	100	184.459	139.865	135.000	0.676	1.000	1.000	1.000
682	1.826	1.000	2.436	100	593.919	140.541	146.310	1.351	2.031	0.492	0.800
683	0.457	1.000	0.956	100	897.297	140.541	135.000	0.676	1.000	1.000	1.000
684	0.913	1.000	1.511	100	605.405	141.216	153.435	0.676	2.000	0.500	1.000
685	1.370	0.967	2.137	100	1015.541	141.216	161.565	0.676	3.000	0.333	1.000
686	4.109	0.482	3.378	100	63.514	141.892	126.870	2.565	1.348	0.742	0.667
687	0.457	1.000	0.956	100	469.595	141.892	135.000	0.676	1.000	1.000	1.000
688	0.457	1.000	0.956	100	632.432	141.892	135.000	0.676	1.000	1.000	1.000
689	1.370	0.967	2.137	100	1124.324	141.892	161.565	0.676	3.000	0.333	1.000
690	0.913	0.785	1.911	100	177.703	142.568	135.000	0.956	2.646	0.378	0.667
691	14.609	0.347	8.248	100	154.054	148.649	34.992	4.176	2.609	0.383	0.587
692	2.739	0.589	3.022	100	264.865	143.243	116.565	1.925	1.752	0.571	0.632
693	0.913	1.000	1.511	100	904.054	143.243	153.435	0.676	2.000	0.500	1.000
694	0.913	1.000	1.511	100	60.135	143.919	153.435	0.676	2.000	0.500	1.000
695	5.022	0.420	5.812	100	145.270	143.919	125.538	2.063	3.767	0.265	0.611
696	1.370	0.967	2.137	100	153.378	143.919	161.565	0.676	3.000	0.333	1.000
697	0.913	1.000	1.511	100	466.892	143.919	153.435	0.676	2.000	0.500	1.000
698	0.457	1.000	0.956	100	864.865	143.919	135.000	0.676	1.000	1.000	1.000
699	12.783	0.390	8.547	100	227.703	145.946	161.565	3.519	2.814	0.355	0.577
700	0.457	1.000	0.956	100	992.568	144.595	135.000	0.676	1.000	1.000	1.000
701	0.913	1.000	1.511	100	61.486	145.270	153.435	0.676	2.000	0.500	1.000
702	0.457	1.000	0.956	100	650.000	145.270	135.000	0.676	1.000	1.000	1.000
703	4.109	0.799	3.639	100	726.351	147.297	21.801	2.027	1.758	0.569	0.783
704	0.457	1.000	0.956	100	589.189	145.946	135.000	0.676	1.000	1.000	1.000
705	0.457	1.000	0.956	100	619.595	145.946	135.000	0.676	1.000	1.000	1.000
706	0.457	1.000	0.956	100	1078.378	145.946	135.000	0.676	1.000	1.000	1.000
707	44.284	0.347	14.819	100	259.459	148.649	136.848	6.615	3.311	0.302	0.642
708	0.913	1.000	1.511	100	378.378	146.622	153.435	0.676	2.000	0.500	1.000
709	13.696	0.634	6.891	100	716.892	147.297	168.690	3.378	2.203	0.454	0.759
710	0.457	1.000	0.956	100	897.297	146.622	135.000	0.676	1.000	1.000	1.000
711	1.826	1.000	1.911	100	167.568	147.297	135.000	1.351	1.000	1.000	1.000
712	0.913	1.000	1.511	100	370.946	147.973	153.435	0.676	2.000	0.500	1.000
713	0.457	1.000	0.956	100	372.973	147.973	135.000	0.676	1.000	1.000	1.000
714	0.913	1.000	1.511	100	616.216	147.973	153.435	0.676	2.000	0.500	1.000
715	0.457	1.000	0.956	100	976.351	147.973	135.000	0.676	1.000	1.000	1.000
716	0.457	1.000	0.956	100	26.351	148.649	135.000	0.676	1.000	1.000	1.000
717	0.457	1.000	0.956	100	601.351	148.649	135.000	0.676	1.000	1.000	1.000
718	0.457	1.000	0.956	100	237.838	149.324	135.000	0.676	1.000	1.000	1.000
719	55.698	0.194	20.427	100	244.595	149.324	145.784	7.783	3.911	0.256	0.426
720	5.935	0.956	3.822	92.308	467.568	152.027	45.000	2.703	1.291	0.775	0.897
721	0.457	1.000	0.956	100	902.027	149.324	135.000	0.676	1.000	1.000	1.000
722	2.739	1.000	2.436	100	85.811	151.351	33.690	1.911	1.291	0.775	0.800
723	0.913	1.000	1.511	100	379.054	150.000	153.435	0.676	2.000	0.500	1.000
724	14.153	0.341	9.976	100	424.324	158.784	61.699	3.401	3.417	0.293	0.579
725	10.500	0.756	5.277	100	1062.162	154.730	39.806	3.822	1.584	0.631	0.767
726	3.196	0.419	4.273	100	64.189	150.676	108.435	1.594	3.496	0.286	0.583
727	2.283	0.764	3.022	100	412.162	150.676	153.435	1.351	2.610	0.383	0.769
728	1.370	0.967	2.137	100	729.054	150.676	161.565	0.676	3.000	0.333	1.000
729	0.457	1.000	0.956	100	964.865	150.676	135.000	0.676	1.000	1.000	1.000
730	0.457	1.000	0.956	100	4.730	151.351	135.000	0.676	1.000	1.000	1.000
731	0.457	1.000	0.956	100	70.270	151.351	135.000	0.676	1.000	1.000	1.000
732	4.565	0.449	4.872	100	150.000	152.703	146.310	2.389	2.767	0.361	0.541
733	0.913	1.000	1.511	100	551.351	152.027	153.435	0.676	2.000	0.500	1.000
734	7.761	0.609	5.812	100	680.405	152.027	125.538	2.420	2.727	0.367	0.756
735	0.457	1.000	0.956	100	729.730	152.027	135.000	0.676	1.000	1.000	1.000
736	5.022	0.637	4.533	100	883.784	152.703	153.435	2.063	2.714	0.368	0.710
737	2.283	0.873	2.867	100	734.459	152.703	135.000	1.433	2.308	0.433	0.769
738	0.457	1.000	0.956	100	372.973	153.378	135.000	0.676	1.000	1.000	1.000
739	1.826	1.000	1.911	100	162.838	154.054	135.000	1.351	1.000	1.000	1.000
740	15.522	0.654	7.309	100	815.541	154.054	123.690	3.328	2.416	0.414	0.800
741	26.936	0.177	10.292	98.305	102.703	160.135	23.199	7.843	1.340	0.746	0.518
742	0.913	1.000	1.511	100	569.595	154.730	153.435	0.676	2.000	0.500	1.000
743	0.457	1.000	0.956	100	604.730	154.730	135.000	0.676	1.000	1.000	1.000
744	3.196	1.000	2.436	100	633.784	154.730	123.690	2.027	1.069	0.936	0.875
745	0.913	1.000	1.511	100	1012.162	154.730	153.435	0.676	2.000	0.500	1.000
746	0.457	1.000	0.956	100	372.973	155.405	135.000	0.676	1.000	1.000	1.000
747	0.913	1.000	1.511	100	857.432	155.405	116.565	0.676	2.000	0.500	1.000
748	0.457	1.000	0.956	100	52.027	156.081	135.000	0.676	1.000	1.000	1.000
749	1.826	0.611	3.022	100	921.622	157.432	26.565	1.209	3.493	0.286	0.667
750	0.913	1.000	1.511	100	1005.405	156.081	153.435	0.676	2.000	0.500	1.000
751	0.457	1.000	0.956	100	54.054	156.757	135.000	0.676	1.000	1.000	1.000
752	2.739	0.686	2.786	100	152.703	156.757	104.036	2.027	1.528	0.655	0.667
753	0.457	1.000	0.956	100	562.162	156.757	135.000	0.676	1.000	1.000	1.000
754	3.196	0.943	3.022	100	570.946	156.757	116.565	1.351	1.936	0.517	0.933
755	0.457	1.000	0.956	100	572.973	156.757	135.000	0.676	1.000	1.000	1.000
756	100.438	0.376	20.089	98.636	690.541	175.676	70.346	10.803	2.088	0.479	0.639
757	0.457	1.000	0.956	100	762.162	156.757	135.000	0.676	1.000	1.000	1.000
758	1.826	0.740	2.786	100	632.432	157.432	165.964	0.676	4.000	0.250	1.000
759	1.370	0.754	2.436	100	126.351	158.108	146.310	1.209	2.702	0.370	0.667
760	5.022	0.461	5.146	100	239.189	158.108	113.199	2.027	3.098	0.323	0.710
761	0.457	1.000	0.956	100	243.243	158.108	135.000	0.676	1.000	1.000	1.000
762	0.457	1.000	0.956	100	94.595	158.784	135.000	0.676	1.000	1.000	1.000
763	0.913	1.000	1.511	100	572.973	158.784	153.435	0.676	2.000	0.500	1.000
764	0.913	1.000	1.511	100	742.568	158.784	153.435	0.676	2.000	0.500	1.000
765	0.457	1.000	0.956	100	940.541	158.784	135.000	0.676	1.000	1.000	1.000
766	4.565	0.806	3.940	100	72.297	162.838	59.036	1.967	2.338	0.428	0.800
767	0.457	1.000	0.956	100	637.838	159.459	135.000	0.676	1.000	1.000	1.000
768	0.457	1.000	0.956	100	932.432	159.459	135.000	0.676	1.000	1.000	1.000
769	0.457	1.000	0.956	100	1059.459	159.459	135.000	0.676	1.000	1.000	1.000
770	0.457	1.000	0.956	100	75.676	160.135	135.000	0.676	1.000	1.000	1.000
771	0.457	1.000	0.956	100	420.946	160.135	135.000	0.676	1.000	1.000	1.000
772	0.457	1.000	0.956	100	756.757	160.135	135.000	0.676	1.000	1.000	1.000
773	0.457	1.000	0.956	100	776.351	160.135	135.000	0.676	1.000	1.000	1.000
774	1.826	0.857	2.436	100	945.946	162.162	56.310	1.351	2.000	0.500	0.800
775	0.457	1.000	0.956	100	56.081	160.811	135.000	0.676	1.000	1.000	1.000
776	0.457	1.000	0.956	100	156.757	160.811	135.000	0.676	1.000	1.000	1.000
777	1.370	1.000	1.911	100	575.676	160.811	135.000	1.351	1.464	0.683	0.857
778	2.283	0.641	3.378	100	590.541	160.811	143.130	1.433	3.145	0.318	0.667
779	1.826	0.857	2.137	100	808.784	160.811	108.435	1.351	1.468	0.681	0.800
780	1.370	1.000	1.911	100	931.757	160.811	135.000	1.351	1.464	0.683	0.857
781	0.457	1.000	0.956	100	70.270	161.486	135.000	0.676	1.000	1.000	1.000
782	0.913	1.000	1.511	100	535.135	161.486	153.435	0.676	2.000	0.500	1.000
783	0.913	0.785	1.911	100	902.027	161.486	135.000	0.956	2.646	0.378	0.667
784	1.826	0.740	2.786	100	1046.622	161.486	165.964	0.676	4.000	0.250	1.000
785	0.457	1.000	0.956	100	110.135	162.162	135.000	0.676	1.000	1.000	1.000
786	2.283	0.764	2.436	100	144.595	162.162	123.690	1.351	1.653	0.605	0.833
787	0.457	1.000	0.956	100	340.541	162.162	135.000	0.676	1.000	1.000	1.000
788	0.913	1.000	1.511	100	529.730	162.162	116.565	0.676	2.000	0.500	1.000
789	0.913	1.000	1.511	100	910.811	162.162	153.435	0.676	2.000	0.500	1.000
790	1.370	1.000	1.911	100	934.459	162.162	135.000	1.351	1.464	0.683	0.857
791	0.457	1.000	0.956	100	366.892	162.838	135.000	0.676	1.000	1.000	1.000
792	0.457	1.000	0.956	100	572.973	162.838	135.000	0.676	1.000	1.000	1.000
793	0.457	1.000	0.956	100	618.919	162.838	135.000	0.676	1.000	1.000	1.000
794	0.457	1.000	0.956	100	632.432	162.838	135.000	0.676	1.000	1.000	1.000
795	0.913	1.000	1.511	100	72.973	163.514	153.435	0.676	2.000	0.500	1.000
796	3.196	0.455	4.533	100	109.459	165.541	26.565	1.496	4.446	0.225	0.636
797	18.262	0.490	8.466	100	135.135	163.514	118.610	5.014	1.889	0.529	0.667
798	0.457	1.000	0.956	100	570.946	163.514	135.000	0.676	1.000	1.000	1.000
799	4.565	0.579	4.872	100	593.919	163.514	146.310	1.876	3.551	0.282	0.667
800	73.959	0.562	16.564	100	827.027	165.541	168.232	8.034	2.429	0.412	0.766
801	0.457	1.000	0.956	100	993.919	163.514	135.000	0.676	1.000	1.000	1.000
802	0.913	1.000	1.511	100	633.784	164.189	153.435	0.676	2.000	0.500	1.000
803	0.913	1.000	1.511	100	1041.216	164.189	116.565	0.676	2.000	0.500	1.000
804	0.913	1.000	1.511	100	618.243	164.865	153.435	0.676	2.000	0.500	1.000
805	0.457	1.000	0.956	100	632.432	164.865	135.000	0.676	1.000	1.000	1.000
806	1.826	0.857	2.436	100	50.676	166.892	33.690	1.351	2.000	0.500	0.800
807	2.739	0.390	4.533	100	241.216	167.568	26.565	1.211	5.267	0.190	0.600
808	0.457	1.000	0.956	100	369.595	165.541	135.000	0.676	1.000	1.000	1.000
809	1.826	1.000	1.911	100	572.973	165.541	135.000	1.351	1.000	1.000	1.000
810	1.826	0.698	2.867	100	143.243	168.243	45.000	1.433	2.654	0.377	0.667
811	0.457	1.000	0.956	100	540.541	166.216	135.000	0.676	1.000	1.000	1.000
812	0.457	1.000	0.956	100	953.378	166.216	135.000	0.676	1.000	1.000	1.000
813	0.457	1.000	0.956	100	632.432	166.892	135.000	0.676	1.000	1.000	1.000
814	0.913	0.785	1.911	100	1040.541	168.243	45.000	0.956	2.646	0.378	0.667
815	0.913	1.000	1.511	100	39.189	167.568	153.435	0.676	2.000	0.500	1.000
816	0.913	1.000	1.511	100	572.973	167.568	116.565	0.676	2.000	0.500	1.000
817	0.457	1.000	0.956	100	628.378	167.568	135.000	0.676	1.000	1.000	1.000
818	1.370	0.967	2.137	100	1033.108	167.568	161.565	0.676	3.000	0.333	1.000
819	2.739	0.809	2.786	100	143.243	168.919	104.036	1.351	1.809	0.553	0.857
820	0.913	1.000	1.511	100	892.568	168.919	153.435	0.676	2.000	0.500	1.000
821	3.196	0.375	3.378	100	621.622	169.595	126.870	2.389	1.471	0.680	0.583
822	1.370	0.754	2.436	100	568.919	171.622	33.690	1.209	2.702	0.370	0.667
823	2.283	1.000	2.436	100	943.243	171.622	33.690	1.351	1.553	0.644	0.909
824	0.457	1.000	0.956	100	937.838	170.946	135.000	0.676	1.000	1.000	1.000
825	0.457	1.000	0.956	100	1029.730	170.946	135.000	0.676	1.000	1.000	1.000
826	15.066	0.892	5.447	100	604.054	175.000	29.745	4.465	1.283	0.780	0.835
827	0.457	1.000	0.956	100	71.622	172.297	135.000	0.676	1.000	1.000	1.000
828	0.457	1.000	0.956	100	140.541	172.297	135.000	0.676	1.000	1.000	1.000
829	0.457	1.000	0.956	100	280.405	172.297	135.000	0.676	1.000	1.000	1.000
830	2.283	0.873	2.867	100	339.865	174.324	45.000	1.513	2.188	0.457	0.714
831	1.826	1.000	2.137	100	343.243	172.297	161.565	1.351	1.468	0.681	0.800
832	0.457	1.000	0.956	100	571.622	172.297	135.000	0.676	1.000	1.000	1.000
833	2.739	0.503	4.110	100	583.108	172.297	170.538	0.676	6.000	0.167	1.000
834	1.370	1.000	1.911	100	618.919	173.649	45.000	1.351	1.464	0.683	0.857
835	19.631	0.546	8.653	100	841.892	172.973	141.340	3.960	2.777	0.360	0.711
836	2.739	0.484	3.639	100	934.459	173.649	21.801	1.351	3.198	0.313	0.706
837	1.370	0.754	2.436	100	939.189	173.649	33.690	1.209	2.702	0.370	0.667
838	0.913	1.000	1.511	100	1039.865	172.297	116.565	0.676	2.000	0.500	1.000
839	0.457	1.000	0.956	100	1048.649	172.297	135.000	0.676	1.000	1.000	1.000
840	1.370	1.000	1.911	100	137.838	174.324	45.000	1.351	1.464	0.683	0.857
841	0.457	1.000	0.956	100	291.892	172.973	135.000	0.676	1.000	1.000	1.000
842	0.457	1.000	0.956	100	532.432	172.973	135.000	0.676	1.000	1.000	1.000
843	0.913	1.000	1.511	100	294.595	173.649	116.565	0.676	2.000	0.500	1.000
844	0.457	1.000	0.956	100	366.216	173.649	135.000	0.676	1.000	1.000	1.000
845	0.457	1.000	0.956	100	627.027	173.649	135.000	0.676	1.000	1.000	1.000
846	0.457	1.000	0.956	100	631.757	173.649	135.000	0.676	1.000	1.000	1.000
847	0.913	1.000	1.511	100	956.757	173.649	153.435	0.676	2.000	0.500	1.000
848	0.913	1.000	1.511	100	962.162	173.649	153.435	0.676	2.000	0.500	1.000
849	0.457	1.000	0.956	100	1048.649	173.649	135.000	0.676	1.000	1.000	1.000
850	0.457	1.000	0.956	100	54.054	174.324	135.000	0.676	1.000	1.000	1.000
851	0.913	1.000	1.511	100	66.216	174.324	153.435	0.676	2.000	0.500	1.000
852	0.457	1.000	0.956	100	356.757	174.324	135.000	0.676	1.000	1.000	1.000
853	0.913	1.000	1.511	100	521.622	174.324	153.435	0.676	2.000	0.500	1.000
854	0.457	1.000	0.956	100	639.865	174.324	135.000	0.676	1.000	1.000	1.000
855	0.457	1.000	0.956	100	659.459	174.324	135.000	0.676	1.000	1.000	1.000
856	0.457	1.000	0.956	100	345.946	175.000	135.000	0.676	1.000	1.000	1.000
857	1.370	0.754	2.436	100	550.000	175.676	146.310	1.209	2.702	0.370	0.667
858	0.913	1.000	1.511	100	862.838	175.676	153.435	0.676	2.000	0.500	1.000
859	0.457	1.000	0.956	100	531.081	176.351	135.000	0.676	1.000	1.000	1.000
860	1.370	1.000	1.911	100	620.946	176.351	135.000	1.351	1.464	0.683	0.857
861	0.457	1.000	0.956	100	659.459	176.351	135.000	0.676	1.000	1.000	1.000
862	0.457	1.000	0.956	100	53.378	177.027	135.000	0.676	1.000	1.000	1.000
863	0.913	1.000	1.511	100	139.189	177.027	153.435	0.676	2.000	0.500	1.000
864	37.893	0.465	13.412	100	502.703	177.027	130.914	5.256	3.021	0.331	0.719
865	3.196	0.800	3.378	100	833.108	177.027	143.130	1.911	2.041	0.490	0.778
866	0.457	1.000	0.956	100	956.757	177.027	135.000	0.676	1.000	1.000	1.000
867	0.457	1.000	0.956	100	231.757	177.703	135.000	0.676	1.000	1.000	1.000
868	0.913	1.000	1.511	100	385.135	177.703	153.435	0.676	2.000	0.500	1.000
869	5.022	0.589	4.326	100	656.757	181.081	51.340	2.814	1.628	0.614	0.647
870	31.958	0.461	12.459	100	685.811	187.162	40.601	5.733	2.637	0.379	0.651
871	1.370	0.967	2.137	100	897.297	177.703	161.565	0.676	3.000	0.333	1.000
872	1.370	1.000	1.911	100	962.162	179.054	45.000	1.351	1.464	0.683	0.857
873	7.305	0.719	4.919	100	125.676	179.054	164.055	2.027	2.464	0.406	0.842
874	17.348	0.373	8.784	100	137.162	186.486	67.380	4.942	2.471	0.405	0.580
875	0.913	1.000	1.511	100	186.486	178.378	153.435	0.676	2.000	0.500	1.000
876	0.457	1.000	0.956	100	335.135	178.378	135.000	0.676	1.000	1.000	1.000
877	0.457	1.000	0.956	100	345.946	178.378	135.000	0.676	1.000	1.000	1.000
878	0.457	1.000	0.956	100	372.973	178.378	135.000	0.676	1.000	1.000	1.000
879	2.739	0.348	4.872	100	434.459	178.378	146.310	1.317	5.598	0.179	0.522
880	0.457	1.000	0.956	100	528.378	178.378	135.000	0.676	1.000	1.000	1.000
881	4.109	0.539	4.273	100	529.054	182.432	71.565	1.967	2.795	0.358	0.667
882	1.370	0.754	2.436	100	620.946	178.378	146.310	1.209	2.702	0.370	0.667
883	1.370	1.000	1.911	100	659.459	179.730	45.000	1.351	1.464	0.683	0.857
884	1.370	0.967	2.137	100	870.270	178.378	161.565	0.676	3.000	0.333	1.000
885	1.370	1.000	1.911	100	960.135	178.378	135.000	1.351	1.464	0.683	0.857
886	1.370	0.643	2.436	100	134.459	181.081	56.310	1.209	2.702	0.370	0.667
887	0.913	1.000	1.511	100	570.270	179.054	153.435	0.676	2.000	0.500	1.000
888	0.457	1.000	0.956	100	1008.108	179.054	135.000	0.676	1.000	1.000	1.000
889	2.739	0.809	3.022	100	82.432	179.730	116.565	1.351	2.082	0.480	0.857
890	0.457	1.000	0.956	100	685.811	180.405	135.000	0.676	1.000	1.000	1.000
891	2.283	1.000	2.436	100	131.757	181.081	146.310	1.351	1.553	0.644	0.909
892	3.196	0.348	5.146	100	439.865	181.081	156.801	1.386	5.614	0.178	0.583
893	0.457	1.000	0.956	100	659.459	181.081	135.000	0.676	1.000	1.000	1.000
894	0.457	1.000	0.956	100	881.081	181.081	135.000	0.676	1.000	1.000	1.000
895	0.457	1.000	0.956	100	992.568	181.081	135.000	0.676	1.000	1.000	1.000
896	1.826	1.000	2.137	100	1139.865	181.757	161.565	1.351	1.468	0.681	0.800
897	0.457	1.000	0.956	100	547.297	181.757	135.000	0.676	1.000	1.000	1.000
898	0.913	1.000	1.511	100	622.297	181.757	153.435	0.676	2.000	0.500	1.000
899	0.457	1.000	0.956	100	828.378	181.757	135.000	0.676	1.000	1.000	1.000
900	3.196	1.000	2.436	100	472.973	182.432	123.690	2.027	1.069	0.936	0.875
901	0.913	1.000	1.511	100	685.135	182.432	153.435	0.676	2.000	0.500	1.000
902	0.457	1.000	0.956	100	81.081	183.108	135.000	0.676	1.000	1.000	1.000
903	0.457	1.000	0.956	100	118.243	183.108	135.000	0.676	1.000	1.000	1.000
904	42.458	0.203	15.319	100	644.595	193.243	41.424	7.546	3.139	0.319	0.505
905	0.913	1.000	1.511	100	335.135	183.784	153.435	0.676	2.000	0.500	1.000
906	4.109	0.367	5.812	100	352.027	183.784	144.462	1.911	4.440	0.225	0.500
907	0.457	1.000	0.956	100	361.486	183.784	135.000	0.676	1.000	1.000	1.000
908	0.457	1.000	0.956	100	610.811	183.784	135.000	0.676	1.000	1.000	1.000
909	0.457	1.000	0.956	100	711.486	183.784	135.000	0.676	1.000	1.000	1.000
910	0.457	1.000	0.956	100	972.973	183.784	135.000	0.676	1.000	1.000	1.000
911	0.457	1.000	0.956	100	1058.784	184.459	135.000	0.676	1.000	1.000	1.000
912	1.826	0.857	2.436	100	1085.135	186.486	56.310	1.351	2.031	0.492	0.800
913	0.457	1.000	0.956	100	31.757	185.135	135.000	0.676	1.000	1.000	1.000
914	1.370	0.967	2.137	100	456.081	185.135	161.565	0.676	3.000	0.333	1.000
915	0.457	1.000	0.956	100	569.595	185.135	135.000	0.676	1.000	1.000	1.000
916	0.913	1.000	1.511	100	1129.730	185.811	116.565	0.676	2.000	0.500	1.000
917	2.739	0.425	3.822	100	333.784	186.486	135.000	1.816	2.558	0.391	0.571
918	0.457	1.000	0.956	100	874.324	186.486	135.000	0.676	1.000	1.000	1.000
919	1.370	1.000	1.911	100	1110.135	187.838	45.000	1.351	1.464	0.683	0.857
920	2.283	0.513	3.639	100	29.054	187.162	158.199	1.284	4.051	0.247	0.667
921	0.457	1.000	0.956	100	462.838	187.162	135.000	0.676	1.000	1.000	1.000
922	0.913	1.000	1.511	100	856.081	187.162	153.435	0.676	2.000	0.500	1.000
923	22.827	0.524	10.292	100	242.568	188.514	156.801	4.727	2.564	0.390	0.694
924	5.022	0.394	4.919	100	354.730	187.838	164.055	2.027	2.761	0.362	0.647
925	0.913	1.000	1.511	100	545.946	187.838	153.435	0.676	2.000	0.500	1.000
926	1.826	0.645	2.786	100	367.568	188.514	104.036	0.676	4.000	0.250	1.000
927	0.913	1.000	1.511	100	481.757	188.514	153.435	0.676	2.000	0.500	1.000
928	1.370	1.000	1.911	100	509.459	188.514	135.000	1.351	1.464	0.683	0.857
929	0.457	1.000	0.956	100	614.189	188.514	135.000	0.676	1.000	1.000	1.000
930	2.283	0.599	3.445	100	704.730	188.514	168.690	0.676	5.000	0.200	1.000
931	0.457	1.000	0.956	100	856.081	188.514	135.000	0.676	1.000	1.000	1.000
932	0.457	1.000	0.956	100	1027.027	188.514	135.000	0.676	1.000	1.000	1.000
933	0.457	1.000	0.956	100	1109.459	188.514	135.000	0.676	1.000	1.000	1.000
934	0.457	1.000	0.956	100	32.432	189.189	135.000	0.676	1.000	1.000	1.000
935	0.913	0.785	1.911	100	334.459	189.189	135.000	0.956	2.646	0.378	0.667
936	0.913	1.000	1.511	100	400.000	189.189	116.565	0.676	2.000	0.500	1.000
937	0.457	1.000	0.956	100	540.541	189.189	135.000	0.676	1.000	1.000	1.000
938	0.457	1.000	0.956	100	583.784	189.189	135.000	0.676	1.000	1.000	1.000
939	0.457	1.000	0.956	100	879.730	189.189	135.000	0.676	1.000	1.000	1.000
940	0.457	1.000	0.956	100	881.081	189.189	135.000	0.676	1.000	1.000	1.000
941	0.913	1.000	1.511	100	889.189	189.189	153.435	0.676	2.000	0.500	1.000
942	0.913	1.000	1.511	100	951.351	189.189	116.565	0.676	2.000	0.500	1.000
943	0.913	1.000	1.511	100	56.081	189.865	116.565	0.676	2.000	0.500	1.000
944	0.457	1.000	0.956	100	578.378	190.541	135.000	0.676	1.000	1.000	1.000
945	3.196	0.621	3.378	100	583.784	193.243	53.130	2.027	1.833	0.546	0.667
946	1.370	1.000	1.911	100	881.081	190.541	135.000	1.351	1.464	0.683	0.857
947	0.457	1.000	0.956	100	956.757	190.541	135.000	0.676	1.000	1.000	1.000
948	0.913	1.000	1.511	100	1006.757	190.541	153.435	0.676	2.000	0.500	1.000
949	0.457	1.000	0.956	100	551.351	191.216	135.000	0.676	1.000	1.000	1.000
950	0.457	1.000	0.956	100	554.054	191.216	135.000	0.676	1.000	1.000	1.000
951	0.457	1.000	0.956	100	625.676	191.216	135.000	0.676	1.000	1.000	1.000
952	0.457	1.000	0.956	100	855.405	191.216	135.000	0.676	1.000	1.000	1.000
953	2.283	0.513	3.639	100	947.973	192.568	21.801	1.284	4.051	0.247	0.667
954	0.457	1.000	0.956	100	642.568	191.892	135.000	0.676	1.000	1.000	1.000
955	0.457	1.000	0.956	100	761.486	191.892	135.000	0.676	1.000	1.000	1.000
956	0.457	1.000	0.956	100	976.351	191.892	135.000	0.676	1.000	1.000	1.000
957	5.022	0.637	4.326	100	383.108	196.622	51.340	2.389	1.928	0.519	0.667
958	1.826	1.000	1.911	100	418.919	193.243	135.000	1.351	1.000	1.000	1.000
959	2.283	1.000	2.436	100	625.000	193.243	146.310	1.351	1.553	0.644	0.909
960	0.913	1.000	1.511	100	950.000	193.243	153.435	0.676	2.000	0.500	1.000
961	0.457	1.000	0.956	100	1129.730	193.243	135.000	0.676	1.000	1.000	1.000
962	0.913	0.785	1.911	100	50.676	193.919	135.000	0.956	2.646	0.378	0.667
963	0.457	1.000	0.956	100	988.514	193.919	135.000	0.676	1.000	1.000	1.000
964	0.457	1.000	0.956	100	24.324	194.595	135.000	0.676	1.000	1.000	1.000
965	0.457	1.000	0.956	100	31.757	194.595	135.000	0.676	1.000	1.000	1.000
966	4.565	1.000	3.022	100	251.351	194.595	116.565	2.027	1.327	0.753	0.909
967	0.457	1.000	0.956	100	475.000	194.595	135.000	0.676	1.000	1.000	1.000
968	0.457	1.000	0.956	100	1131.081	194.595	135.000	0.676	1.000	1.000	1.000
969	0.913	1.000	1.511	100	583.784	195.270	153.435	0.676	2.000	0.500	1.000
970	1.370	1.000	1.911	100	66.892	195.946	135.000	1.351	1.464	0.683	0.857
971	2.283	0.764	3.022	100	966.892	195.946	153.435	1.351	2.610	0.383	0.769
972	0.457	1.000	0.956	100	1048.649	195.946	135.000	0.676	1.000	1.000	1.000
973	0.913	1.000	1.511	100	354.730	196.622	153.435	0.676	2.000	0.500	1.000
974	0.457	1.000	0.956	100	362.162	196.622	135.000	0.676	1.000	1.000	1.000
975	2.739	0.615	3.639	100	627.027	197.973	21.801	1.351	3.550	0.282	0.750
976	0.913	1.000	1.511	100	956.757	196.622	153.435	0.676	2.000	0.500	1.000
977	0.457	1.000	0.956	100	24.324	197.297	135.000	0.676	1.000	1.000	1.000
978	0.913	1.000	1.511	100	583.784	197.297	153.435	0.676	2.000	0.500	1.000
979	1.370	0.754	2.436	100	592.568	198.649	33.690	1.209	2.702	0.370	0.667
980	0.457	1.000	0.956	100	637.838	197.297	135.000	0.676	1.000	1.000	1.000
981	0.913	1.000	1.511	100	972.973	197.297	116.565	0.676	2.000	0.500	1.000
982	1.826	1.000	2.436	100	1048.649	198.649	33.690	1.351	2.000	0.500	0.800
983	0.913	1.000	1.511	100	194.595	197.973	153.435	0.676	2.000	0.500	1.000
984	1.370	0.967	2.137	100	743.243	197.973	161.565	0.676	3.000	0.333	1.000
985	0.913	1.000	1.511	100	1022.297	197.973	153.435	0.676	2.000	0.500	1.000
986	0.913	1.000	1.511	100	72.973	198.649	153.435	0.676	2.000	0.500	1.000
987	0.913	1.000	1.511	100	889.189	198.649	153.435	0.676	2.000	0.500	1.000
988	0.457	1.000	0.956	100	949.324	198.649	135.000	0.676	1.000	1.000	1.000
989	0.913	1.000	1.511	100	967.568	198.649	153.435	0.676	2.000	0.500	1.000
990	3.652	0.429	3.378	100	21.622	201.351	36.870	2.703	1.264	0.791	0.615
991	19.175	0.283	12.623	100	160.135	199.324	164.476	2.953	5.250	0.190	0.683
992	0.457	1.000	0.956	100	895.270	199.324	135.000	0.676	1.000	1.000	1.000
993	0.457	1.000	0.956	100	400.000	200.000	135.000	0.676	1.000	1.000	1.000
994	0.457	1.000	0.956	100	16.216	200.676	135.000	0.676	1.000	1.000	1.000
995	0.913	1.000	1.511	100	75.676	200.676	153.435	0.676	2.000	0.500	1.000
996	2.739	0.441	4.273	100	410.811	200.676	161.565	1.311	4.593	0.218	0.667
997	0.457	1.000	0.956	100	550.676	200.676	135.000	0.676	1.000	1.000	1.000
998	0.457	1.000	0.956	100	579.730	200.676	135.000	0.676	1.000	1.000	1.000
999	0.457	1.000	0.956	100	593.919	200.676	135.000	0.676	1.000	1.000	1.000
1000	1.826	1.000	1.911	100	870.270	200.676	135.000	1.351	1.000	1.000	1.000
1001	0.457	1.000	0.956	100	770.270	201.351	135.000	0.676	1.000	1.000	1.000
1002	0.457	1.000	0.956	100	127.703	202.027	135.000	0.676	1.000	1.000	1.000
1003	0.913	1.000	1.511	100	150.676	202.027	153.435	0.676	2.000	0.500	1.000
1004	1.370	0.967	2.137	100	527.703	202.027	161.565	0.676	3.000	0.333	1.000
1005	1.370	0.967	2.137	100	152.703	202.703	161.565	0.676	3.000	0.333	1.000
1006	0.913	1.000	1.511	100	126.351	203.378	153.435	0.676	2.000	0.500	1.000
1007	0.913	1.000	1.511	100	527.703	203.378	153.435	0.676	2.000	0.500	1.000
1008	0.913	1.000	1.511	100	543.919	203.378	116.565	0.676	2.000	0.500	1.000
1009	0.457	1.000	0.956	100	696.622	203.378	135.000	0.676	1.000	1.000	1.000
1010	0.457	1.000	0.956	100	227.027	204.054	135.000	0.676	1.000	1.000	1.000
1011	0.913	1.000	1.511	100	362.162	204.054	153.435	0.676	2.000	0.500	1.000
1012	0.457	1.000	0.956	100	540.541	204.054	135.000	0.676	1.000	1.000	1.000
1013	0.913	1.000	1.511	100	570.946	204.054	153.435	0.676	2.000	0.500	1.000
1014	0.457	1.000	0.956	100	913.514	204.054	135.000	0.676	1.000	1.000	1.000
1015	3.652	0.520	4.533	100	37.838	206.757	26.565	1.814	3.349	0.299	0.667
1016	10.044	0.474	7.554	100	178.378	204.730	153.435	3.053	2.640	0.379	0.688
1017	0.457	1.000	0.956	100	351.351	204.730	135.000	0.676	1.000	1.000	1.000
1018	13.696	0.294	10.135	100	471.622	210.811	36.870	4.224	3.492	0.286	0.545
1019	0.913	1.000	1.511	100	527.027	204.730	153.435	0.676	2.000	0.500	1.000
1020	1.370	0.754	2.436	100	625.000	206.081	33.690	1.209	2.702	0.370	0.667
1021	1.370	0.754	2.436	100	736.486	204.730	146.310	1.209	2.702	0.370	0.667
1022	5.935	0.510	5.146	100	127.027	205.405	156.801	2.027	2.874	0.348	0.743
1023	2.283	1.000	2.436	100	467.568	207.432	56.310	1.351	1.553	0.644	0.909
1024	3.196	0.800	3.378	100	539.189	205.405	126.870	1.814	2.211	0.452	0.778
1025	0.913	1.000	1.511	100	569.595	205.405	153.435	0.676	2.000	0.500	1.000
1026	0.457	1.000	0.956	100	589.189	205.405	135.000	0.676	1.000	1.000	1.000
1027	0.457	1.000	0.956	100	351.351	206.081	135.000	0.676	1.000	1.000	1.000
1028	5.022	0.976	3.822	100	785.811	206.081	135.000	2.389	1.851	0.540	0.846
1029	0.457	1.000	0.956	100	924.324	206.081	135.000	0.676	1.000	1.000	1.000
1030	0.457	1.000	0.956	100	1082.432	206.081	135.000	0.676	1.000	1.000	1.000
1031	0.457	1.000	0.956	100	89.865	207.432	135.000	0.676	1.000	1.000	1.000
1032	0.457	1.000	0.956	100	977.703	207.432	135.000	0.676	1.000	1.000	1.000
1033	0.457	1.000	0.956	100	991.892	207.432	135.000	0.676	1.000	1.000	1.000
1034	1.370	0.967	2.137	100	381.757	208.108	161.565	0.676	3.000	0.333	1.000
1035	76.242	0.476	18.774	100	835.135	208.784	149.744	6.493	3.276	0.305	0.793
1036	4.565	1.000	3.378	100	32.432	208.784	126.870	2.027	1.288	0.776	0.909
1037	0.913	1.000	1.511	100	223.649	208.784	153.435	0.676	2.000	0.500	1.000
1038	0.457	1.000	0.956	100	951.351	209.459	135.000	0.676	1.000	1.000	1.000
1039	0.457	1.000	0.956	100	579.730	210.135	135.000	0.676	1.000	1.000	1.000
1040	0.913	1.000	1.511	100	679.054	210.135	153.435	0.676	2.000	0.500	1.000
1041	7.305	0.652	4.872	100	924.324	210.135	123.690	2.814	2.153	0.464	0.681
1042	3.196	0.800	3.378	100	75.676	210.811	143.130	1.911	2.041	0.490	0.778
1043	0.457	1.000	0.956	100	175.676	210.811	135.000	0.676	1.000	1.000	1.000
1044	0.457	1.000	0.956	100	478.378	210.811	135.000	0.676	1.000	1.000	1.000
1045	0.913	1.000	1.511	100	545.946	210.811	153.435	0.676	2.000	0.500	1.000
1046	0.913	1.000	1.511	100	591.216	210.811	153.435	0.676	2.000	0.500	1.000
1047	6.848	0.612	4.273	100	145.946	211.486	108.435	2.703	1.428	0.700	0.750
1048	1.370	0.754	2.436	100	868.919	211.486	146.310	1.209	2.702	0.370	0.667
1049	96.329	0.438	19.360	96.682	57.432	221.622	29.249	10.850	1.741	0.574	0.692
1050	0.913	1.000	1.511	100	427.027	212.162	116.565	0.676	2.000	0.500	1.000
1051	0.457	1.000	0.956	100	620.946	212.162	135.000	0.676	1.000	1.000	1.000
1052	1.370	1.000	1.911	100	190.541	214.189	45.000	1.351	1.464	0.683	0.857
1053	0.457	1.000	0.956	100	254.054	212.838	135.000	0.676	1.000	1.000	1.000
1054	0.457	1.000	0.956	100	372.297	212.838	135.000	0.676	1.000	1.000	1.000
1055	19.175	0.469	9.674	100	427.027	216.892	12.095	3.638	3.760	0.266	0.689
1056	0.457	1.000	0.956	100	799.324	212.838	135.000	0.676	1.000	1.000	1.000
1057	0.913	1.000	1.511	100	77.703	213.514	116.565	0.676	2.000	0.500	1.000
1058	0.457	1.000	0.956	100	134.459	213.514	135.000	0.676	1.000	1.000	1.000
1059	0.913	1.000	1.511	100	370.270	213.514	153.435	0.676	2.000	0.500	1.000
1060	0.457	1.000	0.956	100	421.622	213.514	135.000	0.676	1.000	1.000	1.000
1061	7.305	0.539	4.778	100	475.000	213.514	135.000	3.206	1.274	0.785	0.711
1062	0.457	1.000	0.956	100	253.378	214.189	135.000	0.676	1.000	1.000	1.000
1063	1.826	0.740	2.786	100	196.622	214.865	165.964	0.676	4.000	0.250	1.000
1064	8.674	0.343	7.880	100	500.676	221.622	59.036	2.364	4.523	0.221	0.633
1065	10.957	0.390	6.757	100	629.730	218.919	36.870	3.777	1.669	0.599	0.585
1066	0.913	1.000	1.511	100	929.730	214.865	153.435	0.676	2.000	0.500	1.000
1067	1.370	1.000	1.911	100	793.919	215.541	135.000	1.351	1.464	0.683	0.857
1068	0.913	1.000	1.511	100	539.189	216.216	153.435	0.676	2.000	0.500	1.000
1069	0.457	1.000	0.956	100	575.000	216.216	135.000	0.676	1.000	1.000	1.000
1070	0.913	1.000	1.511	100	585.811	216.216	153.435	0.676	2.000	0.500	1.000
1071	0.457	1.000	0.956	100	800.000	216.216	135.000	0.676	1.000	1.000	1.000
1072	0.913	1.000	1.511	100	950.676	216.216	153.435	0.676	2.000	0.500	1.000
1073	2.283	1.000	2.436	100	535.811	218.243	33.690	1.351	1.553	0.644	0.909
1074	1.370	0.967	2.137	100	745.946	216.892	161.565	0.676	3.000	0.333	1.000
1075	0.913	1.000	1.511	100	293.243	217.568	153.435	0.676	2.000	0.500	1.000
1076	0.913	1.000	1.511	100	308.108	217.568	153.435	0.676	2.000	0.500	1.000
1077	0.457	1.000	0.956	100	545.946	217.568	135.000	0.676	1.000	1.000	1.000
1078	0.457	1.000	0.956	100	783.108	217.568	135.000	0.676	1.000	1.000	1.000
1079	1.370	1.000	1.911	100	951.351	218.919	45.000	1.351	1.464	0.683	0.857
1080	0.913	1.000	1.511	100	749.324	218.243	153.435	0.676	2.000	0.500	1.000
1081	0.457	1.000	0.956	100	970.946	218.243	135.000	0.676	1.000	1.000	1.000
1082	0.913	1.000	1.511	100	1056.757	218.919	116.565	0.676	2.000	0.500	1.000
1083	1.370	0.967	2.137	100	540.541	219.595	161.565	0.676	3.000	0.333	1.000
1084	0.457	1.000	0.956	100	395.946	220.270	135.000	0.676	1.000	1.000	1.000
1085	0.913	1.000	1.511	100	697.297	220.270	153.435	0.676	2.000	0.500	1.000
1086	1.370	1.000	1.911	100	750.676	221.622	45.000	1.351	1.464	0.683	0.857
1087	1.370	1.000	1.911	100	1093.243	220.270	135.000	1.351	1.464	0.683	0.857
1088	2.283	0.764	3.022	100	545.946	222.297	26.565	1.351	2.610	0.383	0.769
1089	1.826	0.611	3.022	100	985.135	220.946	153.435	1.284	3.093	0.323	0.667
1090	0.457	1.000	0.956	100	59.459	221.622	135.000	0.676	1.000	1.000	1.000
1091	0.457	1.000	0.956	100	513.514	221.622	135.000	0.676	1.000	1.000	1.000
1092	0.913	1.000	1.511	100	540.541	221.622	153.435	0.676	2.000	0.500	1.000
1093	0.457	1.000	0.956	100	698.649	221.622	135.000	0.676	1.000	1.000	1.000
1094	0.913	1.000	1.511	100	925.676	221.622	153.435	0.676	2.000	0.500	1.000
1095	0.457	1.000	0.956	100	56.081	222.297	135.000	0.676	1.000	1.000	1.000
1096	0.457	1.000	0.956	100	200.000	222.297	135.000	0.676	1.000	1.000	1.000
1097	1.370	1.000	1.911	100	1070.270	222.297	135.000	1.351	1.464	0.683	0.857
1098	37.893	0.189	15.555	100	258.108	222.973	124.380	10.024	1.556	0.643	0.401
1099	0.457	1.000	0.956	100	378.378	222.973	135.000	0.676	1.000	1.000	1.000
1100	1.826	0.740	2.786	100	1032.432	222.973	165.964	0.676	4.000	0.250	1.000
1101	0.457	1.000	0.956	100	1068.243	222.973	135.000	0.676	1.000	1.000	1.000
1102	2.739	1.000	2.436	100	205.405	223.649	146.310	1.351	1.500	0.667	1.000
1103	0.457	1.000	0.956	100	700.000	223.649	135.000	0.676	1.000	1.000	1.000
1104	0.457	1.000	0.956	100	513.514	224.324	135.000	0.676	1.000	1.000	1.000
1105	0.457	1.000	0.956	100	589.189	224.324	135.000	0.676	1.000	1.000	1.000
1106	3.196	0.898	3.378	100	681.081	224.324	143.130	1.814	2.339	0.427	0.778
1107	9.131	0.444	7.704	100	833.784	229.054	37.875	2.338	4.530	0.221	0.667
1108	0.457	1.000	0.956	100	168.919	225.000	135.000	0.676	1.000	1.000	1.000
1109	0.457	1.000	0.956	100	1024.324	225.000	135.000	0.676	1.000	1.000	1.000
1110	0.457	1.000	0.956	100	1102.703	225.000	135.000	0.676	1.000	1.000	1.000
1111	3.196	0.687	3.022	100	18.919	228.378	63.435	2.027	1.544	0.648	0.737
1112	3.196	0.564	3.639	100	170.946	227.027	21.801	2.027	1.992	0.502	0.636
1113	0.457	1.000	0.956	100	539.189	225.676	135.000	0.676	1.000	1.000	1.000
1114	0.457	1.000	0.956	100	607.432	226.351	135.000	0.676	1.000	1.000	1.000
1115	0.913	1.000	1.511	100	766.216	226.351	153.435	0.676	2.000	0.500	1.000
1116	0.457	1.000	0.956	100	878.378	226.351	135.000	0.676	1.000	1.000	1.000
1117	0.457	1.000	0.956	100	975.676	226.351	135.000	0.676	1.000	1.000	1.000
1118	8.674	0.796	5.146	100	23.649	227.027	113.199	2.703	2.137	0.468	0.826
1119	45.197	0.270	17.542	98.990	51.351	231.757	15.642	7.480	3.240	0.309	0.505
1120	1.370	0.643	2.436	100	545.270	229.054	56.310	1.209	2.702	0.370	0.667
1121	0.913	1.000	1.511	100	737.838	227.027	153.435	0.676	2.000	0.500	1.000
1122	0.457	1.000	0.956	100	1135.135	227.027	135.000	0.676	1.000	1.000	1.000
1123	56.154	0.214	25.640	98.374	362.838	229.054	161.565	4.714	7.907	0.126	0.566
1124	0.457	1.000	0.956	100	718.919	227.703	135.000	0.676	1.000	1.000	1.000
1125	1.370	1.000	1.911	100	356.757	229.730	45.000	1.351	1.464	0.683	0.857
1126	3.652	1.000	2.867	100	678.378	228.378	135.000	2.027	1.229	0.814	0.941
1127	0.457	1.000	0.956	100	736.486	228.378	135.000	0.676	1.000	1.000	1.000
1128	0.457	1.000	0.956	100	785.135	228.378	135.000	0.676	1.000	1.000	1.000
1129	4.565	0.887	3.378	100	946.622	230.405	36.870	2.389	1.587	0.630	0.800
1130	0.457	1.000	0.956	100	62.162	229.054	135.000	0.676	1.000	1.000	1.000
1131	0.913	1.000	1.511	100	700.676	229.054	153.435	0.676	2.000	0.500	1.000
1132	1.826	0.698	2.867	100	743.919	231.081	45.000	1.433	2.530	0.395	0.615
1133	9.587	0.511	6.957	100	827.027	232.432	29.055	2.941	2.648	0.378	0.700
1134	0.457	1.000	0.956	100	858.784	229.054	135.000	0.676	1.000	1.000	1.000
1135	0.913	1.000	1.511	100	27.027	229.730	116.565	0.676	2.000	0.500	1.000
1136	0.457	1.000	0.956	100	529.730	229.730	135.000	0.676	1.000	1.000	1.000
1137	0.457	1.000	0.956	100	629.730	229.730	135.000	0.676	1.000	1.000	1.000
1138	9.587	0.690	5.277	100	879.730	229.730	129.806	3.325	1.753	0.570	0.778
1139	3.196	0.718	3.445	100	340.541	230.405	168.690	1.351	2.423	0.413	0.824
1140	0.457	1.000	0.956	100	32.432	231.081	135.000	0.676	1.000	1.000	1.000
1141	0.913	1.000	1.511	100	335.135	231.081	153.435	0.676	2.000	0.500	1.000
1142	0.457	1.000	0.956	100	354.054	231.081	135.000	0.676	1.000	1.000	1.000
1143	0.913	1.000	1.511	100	17.568	231.757	116.565	0.676	2.000	0.500	1.000
1144	0.913	1.000	1.511	100	719.595	231.757	153.435	0.676	2.000	0.500	1.000
1145	2.283	0.764	3.022	100	744.595	231.757	153.435	1.351	2.610	0.383	0.769
1146	5.478	0.471	5.773	100	177.027	232.432	159.444	1.715	4.427	0.226	0.727
1147	3.196	0.647	3.445	100	324.324	232.432	101.310	1.351	2.423	0.413	0.824
1148	0.457	1.000	0.956	100	340.541	232.432	135.000	0.676	1.000	1.000	1.000
1149	0.457	1.000	0.956	100	383.784	232.432	135.000	0.676	1.000	1.000	1.000
1150	0.913	1.000	1.511	100	167.568	233.784	153.435	0.676	2.000	0.500	1.000
1151	0.913	1.000	1.511	100	727.027	233.784	153.435	0.676	2.000	0.500	1.000
1152	0.457	1.000	0.956	100	746.622	234.459	135.000	0.676	1.000	1.000	1.000
1153	0.913	1.000	1.511	100	1070.270	234.459	153.435	0.676	2.000	0.500	1.000
1154	0.457	1.000	0.956	100	883.784	235.135	135.000	0.676	1.000	1.000	1.000
1155	221.877	0.298	29.684	96.502	985.135	243.243	11.821	20.510	1.352	0.740	0.592
1156	0.457	1.000	0.956	100	27.027	235.811	135.000	0.676	1.000	1.000	1.000
1157	33.327	0.468	12.820	100	20.270	240.541	18.435	5.308	2.906	0.344	0.709
1158	1.826	0.857	2.436	100	63.514	235.811	123.690	1.351	2.031	0.492	0.800
1159	0.457	1.000	0.956	100	1070.270	235.811	135.000	0.676	1.000	1.000	1.000
1160	0.457	1.000	0.956	100	228.378	236.486	135.000	0.676	1.000	1.000	1.000
1161	5.935	0.697	4.872	100	265.541	236.486	146.310	2.389	2.603	0.384	0.765
1162	2.283	0.444	3.022	100	334.459	237.838	26.565	1.911	1.788	0.559	0.556
1163	6.848	0.333	7.704	100	886.486	236.486	142.125	2.255	5.258	0.190	0.508
1164	0.457	1.000	0.956	100	800.000	237.162	135.000	0.676	1.000	1.000	1.000
1165	65.741	0.431	17.619	100	958.784	239.189	175.601	7.250	2.938	0.340	0.727
1166	1.370	0.967	2.137	100	1052.027	237.162	161.565	0.676	3.000	0.333	1.000
1167	10.500	0.775	4.872	100	227.027	241.892	33.690	4.054	1.091	0.917	0.807
1168	1.826	1.000	2.137	100	737.162	237.838	161.565	1.351	1.468	0.681	0.800
1169	0.457	1.000	0.956	100	765.541	238.514	135.000	0.676	1.000	1.000	1.000
1170	1.370	1.000	1.911	100	1054.054	239.865	45.000	1.351	1.464	0.683	0.857
1171	14.153	0.366	7.704	100	283.108	243.243	15.255	3.752	2.756	0.363	0.569
1172	12.327	0.534	6.043	96.296	295.270	239.189	116.565	3.822	1.710	0.585	0.667
1173	0.457	1.000	0.956	100	1124.324	239.189	135.000	0.676	1.000	1.000	1.000
1174	4.565	1.000	3.022	100	168.919	240.541	153.435	2.027	1.384	0.723	0.909
1175	209.551	0.197	37.820	97.168	269.595	239.865	138.621	15.415	2.560	0.391	0.537
1176	0.457	1.000	0.956	100	540.541	240.541	135.000	0.676	1.000	1.000	1.000
1177	11.870	0.589	6.374	100	951.351	245.946	57.995	3.826	2.012	0.497	0.650
1178	0.457	1.000	0.956	100	1075.676	240.541	135.000	0.676	1.000	1.000	1.000
1179	0.457	1.000	0.956	100	1121.622	240.541	135.000	0.676	1.000	1.000	1.000
1180	0.913	1.000	1.511	100	622.973	241.216	153.435	0.676	2.000	0.500	1.000
1181	0.457	1.000	0.956	100	778.378	241.216	135.000	0.676	1.000	1.000	1.000
1182	0.457	1.000	0.956	100	788.514	241.216	135.000	0.676	1.000	1.000	1.000
1183	0.457	1.000	0.956	100	1127.027	241.216	135.000	0.676	1.000	1.000	1.000
1184	0.457	1.000	0.956	100	776.351	241.892	135.000	0.676	1.000	1.000	1.000
1185	53.415	0.212	22.133	100	327.027	247.297	12.339	7.398	2.891	0.346	0.486
1186	0.457	1.000	0.956	100	626.351	242.568	135.000	0.676	1.000	1.000	1.000
1187	5.935	0.697	4.533	100	677.027	242.568	116.565	2.351	2.575	0.388	0.722
1188	0.913	1.000	1.511	100	1022.973	242.568	116.565	0.676	2.000	0.500	1.000
1189	0.913	1.000	1.511	100	281.081	243.243	153.435	0.676	2.000	0.500	1.000
1190	26.023	0.447	10.576	98.246	591.892	248.649	26.565	4.488	3.078	0.325	0.717
1191	3.196	0.564	3.940	100	691.892	243.243	120.964	1.814	2.842	0.352	0.667
1192	0.913	1.000	1.511	100	777.027	243.243	116.565	0.676	2.000	0.500	1.000
1193	4.109	0.698	3.639	100	278.378	246.622	21.801	2.027	1.891	0.529	0.720
1194	10.044	0.513	6.229	100	609.459	250.000	49.399	3.325	2.442	0.409	0.667
1195	1.370	0.754	2.436	100	307.432	245.270	146.310	1.209	2.702	0.370	0.667
1196	5.478	0.359	6.410	100	316.892	247.297	18.435	1.728	5.372	0.186	0.649
1197	1.370	1.000	1.911	100	390.541	246.622	45.000	1.351	1.464	0.683	0.857
1198	7.761	0.763	5.146	100	912.838	245.270	156.801	2.703	1.983	0.504	0.773
1199	0.913	0.785	1.911	100	1123.649	245.270	135.000	0.956	2.646	0.378	0.667
1200	5.022	0.547	4.919	100	310.135	246.622	164.055	1.990	2.998	0.334	0.688
1201	1.370	0.967	2.137	100	947.297	245.946	161.565	0.676	3.000	0.333	1.000
1202	0.913	1.000	1.511	100	381.081	246.622	116.565	0.676	2.000	0.500	1.000
1203	9.587	0.423	7.277	100	820.946	253.378	68.199	2.334	4.144	0.241	0.689
1204	0.457	1.000	0.956	100	189.189	247.297	135.000	0.676	1.000	1.000	1.000
1205	6.392	0.838	4.273	100	945.270	247.297	108.435	2.027	2.138	0.468	0.875
1206	0.457	1.000	0.956	100	694.595	247.973	135.000	0.676	1.000	1.000	1.000
1207	0.913	1.000	1.511	100	1084.459	247.973	153.435	0.676	2.000	0.500	1.000
1208	1.826	1.000	2.137	100	948.649	248.649	161.565	1.351	1.468	0.681	0.800
1209	52.045	0.301	16.061	100	633.784	250.676	157.751	6.563	3.045	0.328	0.651
1210	6.848	0.415	6.655	100	675.000	249.324	156.038	2.667	3.081	0.325	0.625
1211	0.913	1.000	1.511	100	789.865	249.324	153.435	0.676	2.000	0.500	1.000
1212	15.522	0.501	6.891	100	907.432	250.000	168.690	4.730	1.471	0.680	0.694
1213	0.457	1.000	0.956	100	588.514	250.000	135.000	0.676	1.000	1.000	1.000
1214	20.088	0.648	8.248	100	932.432	250.000	124.992	4.231	2.075	0.482	0.846
1215	9.587	0.614	6.229	100	237.162	252.703	12.529	2.703	2.494	0.401	0.778
1216	0.457	1.000	0.956	100	308.108	250.676	135.000	0.676	1.000	1.000	1.000
1217	2.283	1.000	2.436	100	672.297	252.027	33.690	1.351	1.553	0.644	0.909
1218	0.457	1.000	0.956	100	875.000	250.676	135.000	0.676	1.000	1.000	1.000
1219	1.370	0.967	2.137	100	924.324	250.676	161.565	0.676	3.000	0.333	1.000
1220	0.913	1.000	1.511	100	141.892	251.351	116.565	0.676	2.000	0.500	1.000
1221	1.826	0.698	2.436	100	339.865	254.054	56.310	1.351	1.637	0.611	0.727
1222	1.370	0.967	2.137	100	737.162	252.027	161.565	0.676	3.000	0.333	1.000
1223	0.913	1.000	1.511	100	944.595	252.027	153.435	0.676	2.000	0.500	1.000
1224	5.935	1.000	3.378	100	231.081	252.703	126.870	2.703	1.093	0.915	0.897
1225	0.913	0.785	1.911	100	670.946	254.054	45.000	0.956	2.646	0.378	0.667
1226	1.370	0.754	2.436	100	168.919	254.730	33.690	1.209	2.702	0.370	0.667
1227	0.457	1.000	0.956	100	254.054	253.378	135.000	0.676	1.000	1.000	1.000
1228	9.131	0.619	5.773	100	916.216	254.054	159.444	3.246	1.885	0.531	0.702
1229	0.913	1.000	1.511	100	922.973	253.378	153.435	0.676	2.000	0.500	1.000
1230	40.175	0.198	16.564	97.727	255.405	254.054	168.232	8.108	1.970	0.508	0.497
1231	36.066	0.436	13.275	98.734	540.541	254.730	165.256	4.730	3.357	0.298	0.721
1232	2.283	1.000	2.436	100	635.811	254.054	123.690	1.351	1.553	0.644	0.909
1233	7.305	0.611	5.146	100	223.649	255.405	156.801	2.814	2.338	0.428	0.667
1234	1.826	0.857	2.436	100	338.514	256.757	56.310	1.351	2.031	0.492	0.800
1235	20.544	0.422	8.466	100	532.432	255.405	118.610	5.405	1.816	0.551	0.692
1236	1.370	0.967	2.137	100	272.973	256.081	161.565	0.676	3.000	0.333	1.000
1237	24.653	0.146	17.107	100	268.243	260.135	9.090	3.712	6.257	0.160	0.502
1238	1.826	1.000	2.436	100	566.216	257.432	33.690	1.351	2.031	0.492	0.800
1239	25.566	0.324	13.581	100	818.919	269.595	84.289	3.667	4.248	0.235	0.713
1240	3.196	0.647	3.639	100	664.865	258.108	21.801	1.351	2.982	0.335	0.824
1241	0.457	1.000	0.956	100	166.892	257.432	135.000	0.676	1.000	1.000	1.000
1242	1.826	0.740	2.786	100	562.838	257.432	165.964	0.676	4.000	0.250	1.000
1243	0.913	1.000	1.511	100	661.486	257.432	153.435	0.676	2.000	0.500	1.000
1244	4.109	1.000	3.022	100	635.135	258.784	153.435	2.027	1.536	0.651	0.857
1245	0.457	1.000	0.956	100	433.108	258.784	135.000	0.676	1.000	1.000	1.000
1246	56.611	0.610	12.237	95.968	548.649	263.514	6.340	8.120	1.620	0.617	0.790
1247	1.370	1.000	1.911	100	562.838	260.135	45.000	1.351	1.464	0.683	0.857
1248	0.913	1.000	1.511	100	684.459	258.784	153.435	0.676	2.000	0.500	1.000
1249	0.913	1.000	1.511	100	1047.973	258.784	116.565	0.676	2.000	0.500	1.000
1250	0.913	1.000	1.511	100	363.514	259.459	153.435	0.676	2.000	0.500	1.000
1251	0.913	1.000	1.511	100	545.946	259.459	116.565	0.676	2.000	0.500	1.000
1252	2.739	0.769	3.022	100	275.676	260.135	153.435	1.814	2.023	0.494	0.706
1253	0.457	1.000	0.956	100	351.351	260.135	135.000	0.676	1.000	1.000	1.000
1254	0.457	1.000	0.956	100	404.730	260.135	135.000	0.676	1.000	1.000	1.000
1255	0.457	1.000	0.956	100	881.081	260.135	135.000	0.676	1.000	1.000	1.000
1256	0.457	1.000	0.956	100	264.865	260.811	135.000	0.676	1.000	1.000	1.000
1257	1.370	0.967	2.137	100	272.973	260.811	161.565	0.676	3.000	0.333	1.000
1258	0.457	1.000	0.956	100	562.162	260.811	135.000	0.676	1.000	1.000	1.000
1259	1.826	0.857	2.436	100	285.811	261.486	146.310	1.351	2.000	0.500	0.800
1260	6.392	0.502	5.812	100	406.757	261.486	144.462	2.202	3.453	0.290	0.667
1261	3.652	0.914	3.022	100	1045.270	262.838	26.565	2.027	1.435	0.697	0.842
1262	1.826	0.611	3.022	100	1113.514	262.838	26.565	1.209	3.493	0.286	0.667
1263	7.305	0.857	4.273	100	78.378	262.162	108.435	2.703	1.677	0.596	0.842
1264	1.370	0.754	2.436	100	275.000	262.162	146.310	1.209	2.702	0.370	0.667
1265	0.913	1.000	1.511	100	279.054	262.162	153.435	0.676	2.000	0.500	1.000
1266	0.457	1.000	0.956	100	281.081	262.162	135.000	0.676	1.000	1.000	1.000
1267	0.457	1.000	0.956	100	545.946	262.162	135.000	0.676	1.000	1.000	1.000
1268	0.913	1.000	1.511	100	709.459	262.162	153.435	0.676	2.000	0.500	1.000
1269	1.370	1.000	1.911	100	231.757	262.838	135.000	1.351	1.464	0.683	0.857
1270	0.913	1.000	1.511	100	365.541	262.838	116.565	0.676	2.000	0.500	1.000
1271	0.913	1.000	1.511	100	424.324	262.838	153.435	0.676	2.000	0.500	1.000
1272	0.457	1.000	0.956	100	228.378	263.514	135.000	0.676	1.000	1.000	1.000
1273	1.826	1.000	1.911	100	260.135	263.514	135.000	1.351	1.000	1.000	1.000
1274	2.283	0.674	2.867	100	262.838	265.541	45.000	1.911	1.727	0.579	0.714
1275	1.370	0.967	2.137	100	265.541	263.514	161.565	0.676	3.000	0.333	1.000
1276	1.370	0.809	2.137	100	761.486	263.514	108.435	0.676	3.000	0.333	1.000
1277	0.457	1.000	0.956	100	604.730	264.189	135.000	0.676	1.000	1.000	1.000
1278	18.262	0.223	10.135	100	227.703	272.973	53.130	5.745	2.297	0.435	0.494
1279	0.457	1.000	0.956	100	258.784	264.865	135.000	0.676	1.000	1.000	1.000
1280	0.457	1.000	0.956	100	284.459	264.865	135.000	0.676	1.000	1.000	1.000
1281	21.001	0.662	8.164	100	305.405	269.595	24.444	4.730	1.711	0.584	0.767
1282	0.457	1.000	0.956	100	365.541	264.865	135.000	0.676	1.000	1.000	1.000
1283	0.457	1.000	0.956	100	367.568	264.865	135.000	0.676	1.000	1.000	1.000
1284	0.913	1.000	1.511	100	418.243	264.865	153.435	0.676	2.000	0.500	1.000
1285	0.457	1.000	0.956	100	529.730	264.865	135.000	0.676	1.000	1.000	1.000
1286	0.457	1.000	0.956	100	675.676	264.865	135.000	0.676	1.000	1.000	1.000
1287	0.457	1.000	0.956	100	757.432	264.865	135.000	0.676	1.000	1.000	1.000
1288	0.457	1.000	0.956	100	854.054	264.865	135.000	0.676	1.000	1.000	1.000
1289	76.242	0.438	15.408	100	1039.189	277.703	52.125	9.372	1.844	0.542	0.697
1290	0.913	1.000	1.511	100	1113.514	265.541	153.435	0.676	2.000	0.500	1.000
1291	1.370	0.967	2.137	100	225.000	266.216	161.565	0.676	3.000	0.333	1.000
1292	5.022	0.405	4.326	100	264.189	266.216	141.340	2.703	1.453	0.688	0.647
1293	0.457	1.000	0.956	100	278.378	266.216	135.000	0.676	1.000	1.000	1.000
1294	0.457	1.000	0.956	100	364.189	266.216	135.000	0.676	1.000	1.000	1.000
1295	0.913	0.785	1.911	100	675.000	266.216	135.000	0.956	2.646	0.378	0.667
1296	3.652	0.567	4.326	100	990.541	268.919	38.660	1.760	3.238	0.309	0.667
1297	0.457	1.000	0.956	100	216.216	266.892	135.000	0.676	1.000	1.000	1.000
1298	0.457	1.000	0.956	100	774.324	266.892	135.000	0.676	1.000	1.000	1.000
1299	0.457	1.000	0.956	100	974.324	266.892	135.000	0.676	1.000	1.000	1.000
1300	2.283	0.764	3.022	100	1110.135	266.892	153.435	1.351	2.610	0.383	0.769
1301	3.196	0.314	4.919	100	285.811	269.595	15.945	1.779	3.218	0.311	0.483
1302	3.196	0.718	3.445	100	383.784	268.243	168.690	1.351	2.423	0.413	0.824
1303	0.457	1.000	0.956	100	454.054	267.568	135.000	0.676	1.000	1.000	1.000
1304	7.305	0.468	6.229	100	543.919	269.595	12.529	2.027	3.902	0.256	0.711
1305	1.826	0.740	2.786	100	870.946	267.568	165.964	0.676	4.000	0.250	1.000
1306	1.826	1.000	2.436	100	281.757	268.243	146.310	1.351	2.031	0.492	0.800
1307	49.306	0.287	15.672	96.296	972.973	268.243	172.569	5.999	2.386	0.419	0.655
1308	2.739	0.686	3.378	100	75.676	270.946	36.870	1.710	2.391	0.418	0.706
1309	0.913	1.000	1.511	100	83.108	268.919	153.435	0.676	2.000	0.500	1.000
1310	0.457	1.000	0.956	100	221.622	268.919	135.000	0.676	1.000	1.000	1.000
1311	0.457	1.000	0.956	100	379.730	268.919	135.000	0.676	1.000	1.000	1.000
1312	1.826	0.740	2.786	100	87.838	269.595	165.964	0.676	4.000	0.250	1.000
1313	0.457	1.000	0.956	100	212.838	269.595	135.000	0.676	1.000	1.000	1.000
1314	5.022	0.494	4.872	100	263.514	273.649	56.310	2.390	2.673	0.374	0.595
1315	0.457	1.000	0.956	100	387.162	269.595	135.000	0.676	1.000	1.000	1.000
1316	1.826	0.740	2.786	100	804.054	269.595	165.964	0.676	4.000	0.250	1.000
1317	1.370	1.000	1.911	100	215.541	271.622	45.000	1.351	1.464	0.683	0.857
1318	0.457	1.000	0.956	100	283.784	270.270	135.000	0.676	1.000	1.000	1.000
1319	1.826	0.513	2.436	100	286.486	270.270	123.690	1.814	1.517	0.659	0.571
1320	3.652	0.785	3.378	100	347.297	272.297	36.870	1.911	2.014	0.496	0.727
1321	15.066	0.351	9.674	100	459.459	272.973	12.095	3.223	3.534	0.283	0.653
1322	6.392	0.811	4.778	100	783.784	270.270	135.000	2.389	2.142	0.467	0.800
1323	1.370	1.000	1.911	100	791.216	270.270	135.000	1.351	1.464	0.683	0.857
1324	0.913	1.000	1.511	100	808.108	270.270	153.435	0.676	2.000	0.500	1.000
1325	0.457	1.000	0.956	100	947.297	270.270	135.000	0.676	1.000	1.000	1.000
1326	0.913	1.000	1.511	100	475.676	270.946	116.565	0.676	2.000	0.500	1.000
1327	1.370	1.000	1.911	100	521.622	270.946	135.000	1.351	1.464	0.683	0.857
1328	0.457	1.000	0.956	100	684.459	270.946	135.000	0.676	1.000	1.000	1.000
1329	0.457	1.000	0.956	100	848.649	270.946	135.000	0.676	1.000	1.000	1.000
1330	1.826	1.000	1.911	100	871.622	270.946	135.000	1.351	1.000	1.000	1.000
1331	0.913	1.000	1.511	100	1083.784	270.946	153.435	0.676	2.000	0.500	1.000
1332	3.652	0.914	3.022	100	183.108	273.649	26.565	2.027	1.372	0.729	0.800
1333	1.370	0.967	2.137	100	218.919	271.622	161.565	0.676	3.000	0.333	1.000
1334	1.370	0.967	2.137	100	248.649	271.622	161.565	0.676	3.000	0.333	1.000
1335	0.913	1.000	1.511	100	374.324	271.622	153.435	0.676	2.000	0.500	1.000
1336	3.652	0.645	3.940	100	615.541	271.622	149.036	1.911	2.435	0.411	0.727
1337	10.500	0.756	4.533	100	627.027	271.622	116.565	4.054	1.188	0.842	0.793
1338	6.392	0.696	4.919	85.714	234.459	272.297	164.055	2.027	2.562	0.390	0.800
1339	1.826	0.611	3.022	100	242.568	272.297	153.435	1.284	3.093	0.323	0.667
1340	1.826	0.740	2.786	100	302.703	272.297	165.964	0.676	4.000	0.250	1.000
1341	0.457	1.000	0.956	100	354.054	272.297	135.000	0.676	1.000	1.000	1.000
1342	1.370	0.754	2.436	100	356.081	272.297	146.310	1.209	2.702	0.370	0.667
1343	1.370	1.000	1.911	100	454.054	273.649	45.000	1.351	1.464	0.683	0.857
1344	20.088	0.559	8.653	100	810.811	272.297	141.340	3.906	2.710	0.369	0.759
1345	0.457	1.000	0.956	100	1048.649	272.297	135.000	0.676	1.000	1.000	1.000
1346	19.175	0.232	11.144	100	252.027	272.973	165.964	4.563	2.887	0.346	0.556
1347	8.674	0.853	4.533	100	997.973	272.973	116.565	3.278	1.341	0.746	0.809
1348	1.370	1.000	1.911	100	1104.054	272.973	135.000	1.351	1.464	0.683	0.857
1349	0.913	1.000	1.511	100	296.622	273.649	116.565	0.676	2.000	0.500	1.000
1350	0.457	1.000	0.956	100	347.297	273.649	135.000	0.676	1.000	1.000	1.000
1351	1.826	1.000	2.137	100	371.622	273.649	161.565	1.351	1.468	0.681	0.800
1352	23.740	0.232	15.759	98.077	58.784	282.432	30.964	3.333	6.448	0.155	0.556
1353	0.457	1.000	0.956	100	232.432	274.324	135.000	0.676	1.000	1.000	1.000
1354	3.652	1.000	3.022	100	302.703	274.324	153.435	1.351	2.000	0.500	1.000
1355	3.652	0.588	4.273	100	588.514	275.676	18.435	1.351	3.432	0.291	0.800
1356	0.457	1.000	0.956	100	216.216	275.000	135.000	0.676	1.000	1.000	1.000
1357	0.457	1.000	0.956	100	235.135	275.000	135.000	0.676	1.000	1.000	1.000
1358	0.457	1.000	0.956	100	585.135	275.000	135.000	0.676	1.000	1.000	1.000
1359	0.457	1.000	0.956	100	351.351	275.676	135.000	0.676	1.000	1.000	1.000
1360	1.370	0.967	2.137	100	367.568	275.676	161.565	0.676	3.000	0.333	1.000
1361	11.413	0.954	4.919	100	458.784	277.703	15.945	3.378	1.250	0.800	0.862
1362	1.370	1.000	1.911	100	922.297	277.027	45.000	1.351	1.464	0.683	0.857
1363	0.457	1.000	0.956	100	924.324	275.676	135.000	0.676	1.000	1.000	1.000
1364	0.457	1.000	0.956	100	193.919	276.351	135.000	0.676	1.000	1.000	1.000
1365	1.370	0.967	2.137	100	301.351	276.351	161.565	0.676	3.000	0.333	1.000
1366	12.783	0.718	5.812	100	308.108	276.351	125.538	4.598	1.360	0.735	0.789
1367	0.457	1.000	0.956	100	366.216	276.351	135.000	0.676	1.000	1.000	1.000
1368	0.457	1.000	0.956	100	421.622	276.351	135.000	0.676	1.000	1.000	1.000
1369	0.457	1.000	0.956	100	818.919	276.351	135.000	0.676	1.000	1.000	1.000
1370	1.826	1.000	2.436	100	184.459	278.378	33.690	1.351	2.031	0.492	0.800
1371	0.457	1.000	0.956	100	219.595	277.027	135.000	0.676	1.000	1.000	1.000
1372	2.283	0.641	2.786	100	258.784	277.027	165.964	1.351	1.871	0.534	0.714
1373	0.913	1.000	1.511	100	293.243	277.027	153.435	0.676	2.000	0.500	1.000
1374	0.457	1.000	0.956	100	597.297	277.027	135.000	0.676	1.000	1.000	1.000
1375	6.848	0.223	9.484	100	24.324	277.703	175.914	1.351	11.118	0.090	0.698
1376	0.457	1.000	0.956	100	177.703	277.703	135.000	0.676	1.000	1.000	1.000
1377	7.305	0.772	4.872	100	571.622	281.081	33.690	2.867	1.654	0.605	0.762
1378	1.370	0.754	2.436	100	1058.108	279.054	33.690	1.209	2.702	0.370	0.667
1379	8.218	0.606	4.872	100	227.027	279.054	146.310	3.378	1.545	0.647	0.750
1380	2.739	1.000	2.436	100	323.649	278.378	146.310	1.351	1.500	0.667	1.000
1381	3.652	0.621	3.940	100	360.811	280.405	30.964	1.911	2.554	0.392	0.615
1382	20.544	0.798	6.790	100	629.730	281.081	174.289	5.405	1.202	0.832	0.811
1383	0.913	1.000	1.511	100	887.838	278.378	116.565	0.676	2.000	0.500	1.000
1384	2.739	0.532	3.940	100	962.838	280.405	30.964	1.500	3.827	0.261	0.632
1385	1.370	0.754	2.436	100	114.189	279.054	146.310	1.209	2.702	0.370	0.667
1386	20.544	0.599	8.784	100	818.243	279.054	112.620	3.378	3.004	0.333	0.841
1387	0.457	1.000	0.956	100	922.297	279.054	135.000	0.676	1.000	1.000	1.000
1388	19.175	0.472	7.880	100	32.432	286.486	30.964	4.778	1.859	0.538	0.700
1389	0.457	1.000	0.956	100	804.730	279.730	135.000	0.676	1.000	1.000	1.000
1390	43.371	0.170	17.953	97.895	320.270	297.297	70.201	6.002	3.562	0.281	0.499
1391	1.826	0.740	2.786	100	402.703	280.405	165.964	0.676	4.000	0.250	1.000
1392	0.913	1.000	1.511	100	456.081	280.405	153.435	0.676	2.000	0.500	1.000
1393	28.762	0.609	8.248	100	467.568	280.405	124.992	6.459	1.152	0.868	0.754
1394	6.848	0.465	5.277	100	490.541	283.784	39.806	3.190	1.768	0.566	0.667
1395	4.565	0.449	5.447	100	763.514	280.405	150.255	1.816	3.922	0.255	0.625
1396	0.457	1.000	0.956	100	125.676	281.081	135.000	0.676	1.000	1.000	1.000
1397	6.848	0.184	6.410	100	177.027	281.081	108.435	3.541	2.071	0.483	0.366
1398	0.457	1.000	0.956	100	199.324	281.081	135.000	0.676	1.000	1.000	1.000
1399	0.913	1.000	1.511	100	459.459	281.081	153.435	0.676	2.000	0.500	1.000
1400	0.913	1.000	1.511	100	802.703	281.081	153.435	0.676	2.000	0.500	1.000
1401	0.457	1.000	0.956	100	881.081	281.081	135.000	0.676	1.000	1.000	1.000
1402	0.457	1.000	0.956	100	929.730	281.081	135.000	0.676	1.000	1.000	1.000
1403	0.457	1.000	0.956	100	962.162	281.081	135.000	0.676	1.000	1.000	1.000
1404	1.370	0.754	2.436	100	112.162	283.108	33.690	1.209	2.702	0.370	0.667
1405	0.457	1.000	0.956	100	351.351	281.757	135.000	0.676	1.000	1.000	1.000
1406	0.457	1.000	0.956	100	504.054	281.757	135.000	0.676	1.000	1.000	1.000
1407	6.392	1.000	3.940	100	536.486	281.757	120.964	2.027	1.662	0.602	0.966
1408	0.913	1.000	1.511	100	710.135	281.757	153.435	0.676	2.000	0.500	1.000
1409	0.457	1.000	0.956	100	924.324	281.757	135.000	0.676	1.000	1.000	1.000
1410	0.457	1.000	0.956	100	502.703	282.432	135.000	0.676	1.000	1.000	1.000
1411	1.370	0.967	2.137	100	559.459	282.432	161.565	0.676	3.000	0.333	1.000
1412	0.913	1.000	1.511	100	773.649	282.432	153.435	0.676	2.000	0.500	1.000
1413	25.566	0.542	8.653	100	956.757	287.838	38.660	5.951	1.483	0.674	0.671
1414	0.457	1.000	0.956	100	56.757	283.108	135.000	0.676	1.000	1.000	1.000
1415	22.827	0.366	8.248	100	227.027	285.135	145.008	6.313	1.178	0.849	0.690
1416	0.457	1.000	0.956	100	278.378	283.108	135.000	0.676	1.000	1.000	1.000
1417	0.913	1.000	1.511	100	497.973	283.108	153.435	0.676	2.000	0.500	1.000
1418	22.370	0.363	11.800	100	591.216	287.838	13.241	4.511	2.711	0.369	0.658
1419	0.457	1.000	0.956	100	708.108	283.108	135.000	0.676	1.000	1.000	1.000
1420	2.283	1.000	2.436	100	750.000	283.108	146.310	1.351	1.553	0.644	0.909
1421	2.283	1.000	2.436	100	769.595	284.459	33.690	1.351	1.553	0.644	0.909
1422	0.913	1.000	1.511	100	879.730	283.108	153.435	0.676	2.000	0.500	1.000
1423	1.826	0.740	2.786	100	902.703	283.108	165.964	0.676	4.000	0.250	1.000
1424	42.001	0.365	13.665	100	941.892	288.514	171.469	7.612	1.992	0.502	0.579
1425	1.826	1.000	2.137	100	40.541	284.459	161.565	1.351	1.468	0.681	0.800
1426	3.196	0.455	4.110	100	186.486	284.459	170.538	1.351	3.017	0.331	0.700
1427	0.457	1.000	0.956	100	312.162	283.784	135.000	0.676	1.000	1.000	1.000
1428	0.913	1.000	1.511	100	517.568	283.784	153.435	0.676	2.000	0.500	1.000
1429	0.457	1.000	0.956	100	561.486	283.784	135.000	0.676	1.000	1.000	1.000
1430	1.370	0.967	2.137	100	873.649	283.784	161.565	0.676	3.000	0.333	1.000
1431	0.457	1.000	0.956	100	56.081	284.459	135.000	0.676	1.000	1.000	1.000
1432	0.913	1.000	1.511	100	558.784	284.459	153.435	0.676	2.000	0.500	1.000
1433	5.478	0.539	5.146	100	562.162	287.162	23.199	2.117	3.308	0.302	0.615
1434	3.652	0.539	4.273	100	567.568	284.459	161.565	1.351	3.759	0.266	0.800
1435	0.913	1.000	1.511	100	605.405	284.459	116.565	0.676	2.000	0.500	1.000
1436	10.957	0.629	6.655	100	700.000	287.162	23.962	2.703	2.372	0.422	0.842
1437	0.457	1.000	0.956	100	737.838	284.459	135.000	0.676	1.000	1.000	1.000
1438	0.457	1.000	0.956	100	763.514	284.459	135.000	0.676	1.000	1.000	1.000
1439	0.913	1.000	1.511	100	881.081	284.459	153.435	0.676	2.000	0.500	1.000
1440	0.457	1.000	0.956	100	572.973	285.135	135.000	0.676	1.000	1.000	1.000
1441	5.935	0.530	4.533	100	629.054	288.514	26.565	3.023	1.588	0.630	0.634
1442	0.457	1.000	0.956	100	118.919	285.811	135.000	0.676	1.000	1.000	1.000
1443	0.457	1.000	0.956	100	183.784	285.811	135.000	0.676	1.000	1.000	1.000
1444	22.370	0.379	8.810	100	612.838	285.811	122.471	6.443	1.349	0.741	0.580
1445	1.370	0.967	2.137	100	112.162	286.486	161.565	0.676	3.000	0.333	1.000
1446	0.457	1.000	0.956	100	221.622	286.486	135.000	0.676	1.000	1.000	1.000
1447	0.457	1.000	0.956	100	264.865	286.486	135.000	0.676	1.000	1.000	1.000
1448	0.457	1.000	0.956	100	572.973	286.486	135.000	0.676	1.000	1.000	1.000
1449	0.913	1.000	1.511	100	881.081	286.486	153.435	0.676	2.000	0.500	1.000
1450	0.457	1.000	0.956	100	324.324	287.162	135.000	0.676	1.000	1.000	1.000
1451	3.652	0.710	3.022	100	250.000	288.514	153.435	2.027	1.170	0.854	0.762
1452	1.826	0.740	2.786	100	587.838	287.838	165.964	0.676	4.000	0.250	1.000
1453	1.370	0.967	2.137	100	185.135	288.514	161.565	0.676	3.000	0.333	1.000
1454	0.457	1.000	0.956	100	643.243	288.514	135.000	0.676	1.000	1.000	1.000
1455	0.457	1.000	0.956	100	730.405	288.514	135.000	0.676	1.000	1.000	1.000
1456	0.457	1.000	0.956	100	302.703	289.189	135.000	0.676	1.000	1.000	1.000
1457	0.913	1.000	1.511	100	447.297	289.189	153.435	0.676	2.000	0.500	1.000
1458	8.674	0.359	8.248	100	623.649	289.189	145.008	2.573	4.256	0.235	0.576
1459	14.609	0.345	10.225	100	820.270	289.189	97.595	2.617	5.573	0.179	0.681
1460	0.457	1.000	0.956	100	1091.216	289.189	135.000	0.676	1.000	1.000	1.000
1461	1.370	1.000	1.911	100	300.676	291.216	45.000	1.351	1.464	0.683	0.857
1462	1.370	1.000	1.911	100	517.568	291.216	45.000	1.351	1.464	0.683	0.857
1463	0.457	1.000	0.956	100	233.784	290.541	135.000	0.676	1.000	1.000	1.000
1464	7.305	0.857	3.940	100	250.000	290.541	120.964	2.703	1.399	0.715	0.865
1465	4.565	0.736	3.940	100	324.324	290.541	149.036	2.027	1.947	0.514	0.833
1466	0.457	1.000	0.956	100	44.595	291.216	135.000	0.676	1.000	1.000	1.000
1467	11.413	0.407	6.757	100	294.595	295.270	36.870	3.944	2.238	0.447	0.595
1468	2.739	0.916	2.867	100	378.378	293.243	45.000	1.911	1.593	0.628	0.857
1469	0.913	1.000	1.511	100	923.649	291.216	153.435	0.676	2.000	0.500	1.000
1470	0.457	1.000	0.956	100	1089.189	291.216	135.000	0.676	1.000	1.000	1.000
1471	0.457	1.000	0.956	100	158.108	291.892	135.000	0.676	1.000	1.000	1.000
1472	68.937	0.232	23.013	100	518.919	291.892	93.366	6.757	3.568	0.280	0.630
1473	0.913	1.000	1.511	100	29.054	292.568	153.435	0.676	2.000	0.500	1.000
1474	9.587	0.423	5.773	100	231.757	294.595	159.444	3.633	1.491	0.671	0.618
1475	4.109	0.832	3.639	100	755.405	293.919	21.801	1.351	2.386	0.419	0.947
1476	0.913	1.000	1.511	100	444.595	293.243	153.435	0.676	2.000	0.500	1.000
1477	2.739	0.809	3.022	100	522.297	294.595	26.565	1.351	2.237	0.447	0.857
1478	4.109	1.000	3.378	100	401.351	293.919	143.130	2.027	1.817	0.550	0.857
1479	0.913	1.000	1.511	100	778.378	293.919	153.435	0.676	2.000	0.500	1.000
1480	13.240	0.310	10.999	100	898.649	293.919	137.490	2.860	5.206	0.192	0.592
1481	0.457	1.000	0.956	100	1110.135	293.919	135.000	0.676	1.000	1.000	1.000
1482	0.457	1.000	0.956	100	1111.486	293.919	135.000	0.676	1.000	1.000	1.000
1483	0.913	1.000	1.511	100	118.919	294.595	153.435	0.676	2.000	0.500	1.000
1484	2.283	0.599	3.445	100	248.649	295.270	168.690	0.676	5.000	0.200	1.000
1485	0.457	1.000	0.956	100	259.459	295.270	135.000	0.676	1.000	1.000	1.000
1486	0.457	1.000	0.956	100	437.838	295.270	135.000	0.676	1.000	1.000	1.000
1487	1.370	1.000	1.911	100	389.189	297.973	45.000	1.351	1.464	0.683	0.857
1488	0.913	1.000	1.511	100	404.730	296.622	116.565	0.676	2.000	0.500	1.000
1489	2.283	0.873	2.867	100	229.054	299.324	45.000	1.433	2.308	0.433	0.769
1490	0.913	1.000	1.511	100	387.162	297.297	153.435	0.676	2.000	0.500	1.000
1491	1.370	0.967	2.137	100	694.595	297.297	161.565	0.676	3.000	0.333	1.000
1492	0.913	1.000	1.511	100	697.297	297.297	153.435	0.676	2.000	0.500	1.000
1493	0.457	1.000	0.956	100	702.703	297.297	135.000	0.676	1.000	1.000	1.000
1494	0.913	1.000	1.511	100	266.892	297.973	153.435	0.676	2.000	0.500	1.000
1495	8.218	0.274	9.190	100	277.027	298.649	162.897	1.761	7.946	0.126	0.600
1496	1.370	1.000	1.911	100	405.405	298.649	135.000	1.351	1.464	0.683	0.857
1497	4.565	0.536	3.940	100	906.757	298.649	120.964	3.023	1.310	0.763	0.606
1498	0.457	1.000	0.956	100	934.459	298.649	135.000	0.676	1.000	1.000	1.000
1499	2.739	0.916	3.022	100	767.568	299.324	153.435	1.351	2.082	0.480	0.857
1500	94.960	0.258	22.092	100	921.622	319.595	66.571	16.320	1.212	0.825	0.478
1501	1.826	1.000	2.137	100	789.865	300.676	161.565	1.351	1.468	0.681	0.800
1502	2.739	0.769	3.378	100	1110.811	302.027	36.870	1.814	2.166	0.462	0.706
1503	0.913	1.000	1.511	100	164.865	300.676	153.435	0.676	2.000	0.500	1.000
1504	1.826	0.698	2.436	100	910.811	300.676	123.690	1.351	1.637	0.611	0.727
1505	0.457	1.000	0.956	100	1124.324	300.676	135.000	0.676	1.000	1.000	1.000
1506	0.913	1.000	1.511	100	405.405	301.351	153.435	0.676	2.000	0.500	1.000
1507	0.457	1.000	0.956	100	772.297	301.351	135.000	0.676	1.000	1.000	1.000
1508	0.457	1.000	0.956	100	1109.459	302.027	135.000	0.676	1.000	1.000	1.000
1509	0.457	1.000	0.956	100	264.865	302.703	135.000	0.676	1.000	1.000	1.000
1510	2.283	0.599	3.445	100	308.108	302.703	168.690	0.676	5.000	0.200	1.000
1511	1.370	0.967	2.137	100	405.405	302.703	161.565	0.676	3.000	0.333	1.000
1512	0.457	1.000	0.956	100	421.622	302.703	135.000	0.676	1.000	1.000	1.000
1513	1.826	1.000	2.137	100	453.378	302.703	161.565	1.351	1.468	0.681	0.800
1514	64.828	0.220	21.884	100	980.405	324.324	81.119	10.567	3.295	0.303	0.479
1515	0.457	1.000	0.956	100	443.243	303.378	135.000	0.676	1.000	1.000	1.000
1516	0.457	1.000	0.956	100	55.405	304.054	135.000	0.676	1.000	1.000	1.000
1517	0.457	1.000	0.956	100	307.432	304.054	135.000	0.676	1.000	1.000	1.000
1518	0.913	1.000	1.511	100	444.595	304.054	153.435	0.676	2.000	0.500	1.000
1519	0.457	1.000	0.956	100	1139.865	304.054	135.000	0.676	1.000	1.000	1.000
1520	0.457	1.000	0.956	100	177.703	304.730	135.000	0.676	1.000	1.000	1.000
1521	0.457	1.000	0.956	100	81.081	305.405	135.000	0.676	1.000	1.000	1.000
1522	1.370	0.967	2.137	100	84.459	305.405	161.565	0.676	3.000	0.333	1.000
1523	0.913	1.000	1.511	100	172.973	305.405	116.565	0.676	2.000	0.500	1.000
1524	0.913	1.000	1.511	100	406.757	305.405	116.565	0.676	2.000	0.500	1.000
1525	4.109	0.539	4.273	100	778.378	305.405	161.565	1.351	3.474	0.288	0.750
1526	0.457	1.000	0.956	100	295.270	306.757	135.000	0.676	1.000	1.000	1.000
1527	3.652	0.914	3.378	100	641.892	308.784	36.870	2.027	1.791	0.558	0.800
1528	0.457	1.000	0.956	100	177.703	307.432	135.000	0.676	1.000	1.000	1.000
1529	0.913	1.000	1.511	100	683.108	307.432	153.435	0.676	2.000	0.500	1.000
1530	0.913	1.000	1.511	100	158.784	308.108	153.435	0.676	2.000	0.500	1.000
1531	4.109	0.482	4.533	100	170.270	308.108	153.435	1.814	3.135	0.319	0.692
1532	0.457	1.000	0.956	100	190.541	308.108	135.000	0.676	1.000	1.000	1.000
1533	1.370	0.967	2.137	100	662.838	308.108	161.565	0.676	3.000	0.333	1.000
1534	4.565	0.497	4.533	100	1095.270	308.108	153.435	2.027	2.266	0.441	0.714
1535	0.457	1.000	0.956	100	176.351	308.784	135.000	0.676	1.000	1.000	1.000
1536	0.457	1.000	0.956	100	400.000	308.784	135.000	0.676	1.000	1.000	1.000
1537	1.826	1.000	2.436	100	124.324	311.486	33.690	1.351	2.000	0.500	0.800
1538	0.457	1.000	0.956	100	404.730	310.135	135.000	0.676	1.000	1.000	1.000
1539	0.457	1.000	0.956	100	1043.919	310.811	135.000	0.676	1.000	1.000	1.000
1540	2.739	0.589	3.822	100	100.000	311.486	135.000	1.508	3.513	0.285	0.600
1541	1.370	1.000	1.911	100	188.514	312.838	45.000	1.351	1.464	0.683	0.857
1542	5.478	0.257	8.136	100	525.000	311.486	175.236	0.676	12.000	0.083	1.000
1543	2.739	0.916	2.867	100	785.811	311.486	135.000	1.911	1.593	0.628	0.857
1544	0.457	1.000	0.956	100	1008.108	311.486	135.000	0.676	1.000	1.000	1.000
1545	0.457	1.000	0.956	100	124.324	312.162	135.000	0.676	1.000	1.000	1.000
1546	9.587	0.281	9.745	100	1044.595	312.162	146.310	2.334	5.651	0.177	0.538
1547	1.370	1.000	1.911	100	8.108	312.838	135.000	1.351	1.464	0.683	0.857
1548	2.283	1.000	2.436	100	137.838	312.838	123.690	1.351	1.553	0.644	0.909
1549	1.370	0.967	2.137	100	419.595	312.838	161.565	0.676	3.000	0.333	1.000
1550	2.283	0.444	3.940	100	685.811	312.838	149.036	1.211	4.450	0.225	0.588
1551	0.457	1.000	0.956	100	112.838	313.514	135.000	0.676	1.000	1.000	1.000
1552	1.370	1.000	1.911	100	143.243	313.514	135.000	1.351	1.464	0.683	0.857
1553	0.457	1.000	0.956	100	470.270	313.514	135.000	0.676	1.000	1.000	1.000
1554	4.109	0.884	3.378	100	641.892	313.514	126.870	2.389	1.513	0.661	0.750
1555	0.457	1.000	0.956	100	1140.541	313.514	135.000	0.676	1.000	1.000	1.000
1556	21.457	0.421	9.838	100	10.811	314.865	164.055	4.194	2.625	0.381	0.701
1557	4.565	0.599	4.273	100	187.838	314.189	108.435	1.967	2.543	0.393	0.714
1558	0.457	1.000	0.956	100	454.054	314.189	135.000	0.676	1.000	1.000	1.000
1559	0.457	1.000	0.956	100	789.189	314.189	135.000	0.676	1.000	1.000	1.000
1560	0.457	1.000	0.956	100	102.703	314.865	135.000	0.676	1.000	1.000	1.000
1561	1.826	1.000	2.436	100	164.189	316.216	33.690	1.351	2.031	0.492	0.800
1562	1.826	1.000	1.911	100	421.622	314.865	135.000	1.351	1.000	1.000	1.000
1563	0.457	1.000	0.956	100	900.000	314.865	135.000	0.676	1.000	1.000	1.000
1564	0.457	1.000	0.956	100	151.351	315.541	135.000	0.676	1.000	1.000	1.000
1565	0.457	1.000	0.956	100	647.973	315.541	135.000	0.676	1.000	1.000	1.000
1566	0.913	1.000	1.511	100	137.838	316.216	153.435	0.676	2.000	0.500	1.000
1567	5.478	0.967	3.822	100	521.622	316.216	135.000	2.565	1.481	0.675	0.857
1568	0.457	1.000	0.956	100	695.946	316.216	135.000	0.676	1.000	1.000	1.000
1569	0.913	1.000	1.511	100	789.189	316.216	116.565	0.676	2.000	0.500	1.000
1570	0.457	1.000	0.956	100	57.432	316.892	135.000	0.676	1.000	1.000	1.000
1571	61.633	0.122	29.637	100	643.919	316.892	114.228	11.174	3.136	0.319	0.318
1572	0.457	1.000	0.956	100	389.189	317.568	135.000	0.676	1.000	1.000	1.000
1573	0.457	1.000	0.956	100	518.243	317.568	135.000	0.676	1.000	1.000	1.000
1574	0.457	1.000	0.956	100	1041.216	317.568	135.000	0.676	1.000	1.000	1.000
1575	0.913	1.000	1.511	100	34.459	318.243	153.435	0.676	2.000	0.500	1.000
1576	3.652	0.820	3.378	100	97.297	320.946	53.130	2.027	1.767	0.566	0.842
1577	0.913	1.000	1.511	100	391.216	318.243	153.435	0.676	2.000	0.500	1.000
1578	1.370	1.000	1.911	100	400.000	318.243	135.000	1.351	1.464	0.683	0.857
1579	5.478	0.419	6.229	100	650.676	318.243	139.399	1.911	4.873	0.205	0.615
1580	4.565	0.650	3.639	100	145.270	318.919	111.801	2.622	1.549	0.646	0.690
1581	0.913	1.000	1.511	100	188.514	318.919	153.435	0.676	2.000	0.500	1.000
1582	0.913	1.000	1.511	100	389.189	318.919	153.435	0.676	2.000	0.500	1.000
1583	0.457	1.000	0.956	100	1043.243	318.919	135.000	0.676	1.000	1.000	1.000
1584	0.913	1.000	1.511	100	1051.351	318.919	116.565	0.676	2.000	0.500	1.000
1585	6.392	0.727	5.277	100	36.486	319.595	140.194	2.389	2.805	0.357	0.737
1586	0.457	1.000	0.956	100	151.351	319.595	135.000	0.676	1.000	1.000	1.000
1587	5.022	0.976	3.378	100	207.432	322.297	36.870	2.703	1.313	0.762	0.815
1588	1.370	1.000	1.911	100	672.297	320.946	45.000	1.351	1.464	0.683	0.857
1589	3.196	0.800	3.378	100	58.784	320.270	126.870	1.814	2.211	0.452	0.778
1590	0.913	1.000	1.511	100	126.351	320.270	153.435	0.676	2.000	0.500	1.000
1591	0.913	1.000	1.511	100	233.784	320.270	153.435	0.676	2.000	0.500	1.000
1592	11.870	0.652	6.043	100	525.000	320.270	116.565	3.518	1.901	0.526	0.743
1593	15.522	0.445	8.358	100	818.919	320.270	104.036	3.635	2.581	0.387	0.708
1594	0.913	1.000	1.511	100	921.622	320.270	116.565	0.676	2.000	0.500	1.000
1595	0.457	1.000	0.956	100	99.324	320.946	135.000	0.676	1.000	1.000	1.000
1596	3.196	0.800	3.378	100	714.865	320.946	143.130	1.925	1.835	0.545	0.737
1597	0.913	1.000	1.511	100	124.324	321.622	153.435	0.676	2.000	0.500	1.000
1598	1.826	1.000	1.911	100	151.351	321.622	135.000	1.351	1.000	1.000	1.000
1599	0.913	1.000	1.511	100	154.054	321.622	153.435	0.676	2.000	0.500	1.000
1600	0.913	1.000	1.511	100	711.486	321.622	153.435	0.676	2.000	0.500	1.000
1601	0.913	1.000	1.511	100	681.757	322.973	153.435	0.676	2.000	0.500	1.000
1602	0.913	1.000	1.511	100	901.351	322.973	153.435	0.676	2.000	0.500	1.000
1603	16.892	0.161	16.946	100	40.541	323.649	156.501	2.667	8.496	0.118	0.481
1604	0.457	1.000	0.956	100	64.865	323.649	135.000	0.676	1.000	1.000	1.000
1605	0.913	1.000	1.511	100	124.324	323.649	153.435	0.676	2.000	0.500	1.000
1606	2.739	0.769	3.378	100	216.216	325.676	36.870	1.710	2.391	0.418	0.706
1607	0.913	1.000	1.511	100	726.351	323.649	153.435	0.676	2.000	0.500	1.000
1608	0.457	1.000	0.956	100	154.054	324.324	135.000	0.676	1.000	1.000	1.000
1609	1.826	0.698	2.436	100	286.486	324.324	123.690	1.814	1.581	0.632	0.615
1610	1.370	1.000	1.911	100	713.514	324.324	135.000	1.351	1.464	0.683	0.857
1611	0.913	1.000	1.511	100	1121.622	324.324	153.435	0.676	2.000	0.500	1.000
1612	1.370	1.000	1.911	100	267.568	326.351	45.000	1.351	1.464	0.683	0.857
1613	0.457	1.000	0.956	100	685.811	325.000	135.000	0.676	1.000	1.000	1.000
1614	0.457	1.000	0.956	100	702.027	325.000	135.000	0.676	1.000	1.000	1.000
1615	0.913	1.000	1.511	100	1009.459	325.000	153.435	0.676	2.000	0.500	1.000
1616	1.370	1.000	1.911	100	112.162	327.027	45.000	1.351	1.464	0.683	0.857
1617	0.457	1.000	0.956	100	415.541	325.676	135.000	0.676	1.000	1.000	1.000
1618	0.913	1.000	1.511	100	464.865	325.676	116.565	0.676	2.000	0.500	1.000
1619	1.370	0.967	2.137	100	704.730	325.676	161.565	0.676	3.000	0.333	1.000
1620	19.175	0.563	8.358	100	920.270	333.784	75.964	4.054	2.217	0.451	0.737
1621	0.457	1.000	0.956	100	200.000	326.351	135.000	0.676	1.000	1.000	1.000
1622	7.761	0.609	5.812	100	307.432	329.730	35.538	2.353	2.598	0.385	0.739
1623	1.370	1.000	1.911	100	466.892	326.351	135.000	1.351	1.464	0.683	0.857
1624	1.826	1.000	2.436	100	1116.892	327.703	33.690	1.351	2.031	0.492	0.800
1625	0.457	1.000	0.956	100	139.865	327.027	135.000	0.676	1.000	1.000	1.000
1626	1.370	1.000	1.911	100	279.054	327.027	135.000	1.351	1.464	0.683	0.857
1627	0.457	1.000	0.956	100	102.703	327.703	135.000	0.676	1.000	1.000	1.000
1628	0.913	1.000	1.511	100	118.919	327.703	116.565	0.676	2.000	0.500	1.000
1629	1.370	0.967	2.137	100	414.865	327.703	161.565	0.676	3.000	0.333	1.000
1630	0.457	1.000	0.956	100	909.459	327.703	135.000	0.676	1.000	1.000	1.000
1631	1.370	1.000	1.911	100	75.676	329.730	45.000	1.351	1.464	0.683	0.857
1632	0.457	1.000	0.956	100	78.378	328.378	135.000	0.676	1.000	1.000	1.000
1633	0.913	0.785	1.911	100	285.811	329.730	45.000	0.956	2.646	0.378	0.667
1634	0.457	1.000	0.956	100	486.486	328.378	135.000	0.676	1.000	1.000	1.000
1635	0.457	1.000	0.956	100	823.649	328.378	135.000	0.676	1.000	1.000	1.000
1636	23.740	0.510	9.411	100	197.973	333.784	21.038	4.730	2.039	0.490	0.738
1637	0.913	1.000	1.511	100	299.324	329.054	153.435	0.676	2.000	0.500	1.000
1638	1.370	1.000	1.911	100	427.027	329.054	135.000	1.351	1.464	0.683	0.857
1639	0.457	1.000	0.956	100	729.054	329.054	135.000	0.676	1.000	1.000	1.000
1640	1.370	1.000	1.911	100	783.108	330.405	45.000	1.351	1.464	0.683	0.857
1641	13.696	0.393	8.784	96.667	1043.243	332.432	22.620	2.951	4.097	0.244	0.714
1642	0.457	1.000	0.956	100	1075.676	329.054	135.000	0.676	1.000	1.000	1.000
1643	0.457	1.000	0.956	100	84.459	329.730	135.000	0.676	1.000	1.000	1.000
1644	0.457	1.000	0.956	100	145.946	329.730	135.000	0.676	1.000	1.000	1.000
1645	0.457	1.000	0.956	100	156.757	329.730	135.000	0.676	1.000	1.000	1.000
1646	0.457	1.000	0.956	100	309.459	329.730	135.000	0.676	1.000	1.000	1.000
1647	0.457	1.000	0.956	100	475.676	329.730	135.000	0.676	1.000	1.000	1.000
1648	0.457	1.000	0.956	100	486.486	329.730	135.000	0.676	1.000	1.000	1.000
1649	0.457	1.000	0.956	100	713.514	329.730	135.000	0.676	1.000	1.000	1.000
1650	0.457	1.000	0.956	100	1125.676	329.730	135.000	0.676	1.000	1.000	1.000
1651	0.913	1.000	1.511	100	297.297	330.405	116.565	0.676	2.000	0.500	1.000
1652	0.457	1.000	0.956	100	378.378	330.405	135.000	0.676	1.000	1.000	1.000
1653	0.913	1.000	1.511	100	659.459	330.405	153.435	0.676	2.000	0.500	1.000
1654	266.618	0.224	32.657	99.486	824.324	330.405	155.556	21.930	1.259	0.794	0.554
1655	0.457	1.000	0.956	100	1077.027	330.405	135.000	0.676	1.000	1.000	1.000
1656	1.826	1.000	1.911	100	1114.865	330.405	135.000	1.351	1.000	1.000	1.000
1657	1.826	1.000	1.911	100	56.081	331.081	135.000	1.351	1.000	1.000	1.000
1658	0.913	1.000	1.511	100	427.703	331.081	153.435	0.676	2.000	0.500	1.000
1659	0.457	1.000	0.956	100	1124.324	331.081	135.000	0.676	1.000	1.000	1.000
1660	0.457	1.000	0.956	100	123.649	331.757	135.000	0.676	1.000	1.000	1.000
1661	2.283	0.599	3.445	100	129.730	331.757	168.690	0.676	5.000	0.200	1.000
1662	0.457	1.000	0.956	100	294.595	331.757	135.000	0.676	1.000	1.000	1.000
1663	0.457	1.000	0.956	100	120.946	332.432	135.000	0.676	1.000	1.000	1.000
1664	1.370	0.967	2.137	100	145.946	332.432	161.565	0.676	3.000	0.333	1.000
1665	0.457	1.000	0.956	100	475.676	332.432	135.000	0.676	1.000	1.000	1.000
1666	11.870	0.572	7.054	100	789.189	339.189	73.301	2.027	3.367	0.297	0.881
1667	0.457	1.000	0.956	100	13.514	333.108	135.000	0.676	1.000	1.000	1.000
1668	0.913	1.000	1.511	100	686.486	333.108	153.435	0.676	2.000	0.500	1.000
1669	171.658	0.292	24.474	97.074	906.081	343.243	6.340	12.057	1.891	0.529	0.696
1670	0.457	1.000	0.956	100	1114.865	333.108	135.000	0.676	1.000	1.000	1.000
1671	2.283	0.641	3.378	100	96.622	333.784	143.130	1.496	2.980	0.336	0.625
1672	0.457	1.000	0.956	100	679.054	333.784	135.000	0.676	1.000	1.000	1.000
1673	1.826	0.611	3.022	100	85.135	334.459	153.435	1.209	3.493	0.286	0.667
1674	0.913	1.000	1.511	100	106.081	334.459	153.435	0.676	2.000	0.500	1.000
1675	1.370	0.967	2.137	100	600.676	334.459	161.565	0.676	3.000	0.333	1.000
1676	3.652	0.463	3.378	100	659.459	336.486	36.870	2.565	1.424	0.702	0.593
1677	0.913	1.000	1.511	100	129.730	335.135	153.435	0.676	2.000	0.500	1.000
1678	0.457	1.000	0.956	100	239.865	335.135	135.000	0.676	1.000	1.000	1.000
1679	0.913	1.000	1.511	100	335.135	335.135	153.435	0.676	2.000	0.500	1.000
1680	0.457	1.000	0.956	100	481.081	335.135	135.000	0.676	1.000	1.000	1.000
1681	1.370	0.967	2.137	100	105.405	335.811	161.565	0.676	3.000	0.333	1.000
1682	0.457	1.000	0.956	100	108.108	335.811	135.000	0.676	1.000	1.000	1.000
1683	1.826	1.000	2.436	100	131.757	337.162	33.690	1.351	2.000	0.500	0.800
1684	3.652	0.305	5.812	100	602.703	335.811	125.538	1.695	5.323	0.188	0.485
1685	0.457	1.000	0.956	100	1139.865	335.811	135.000	0.676	1.000	1.000	1.000
1686	1.370	0.643	2.436	100	129.054	336.486	123.690	1.209	2.702	0.370	0.667
1687	0.913	1.000	1.511	100	334.459	336.486	153.435	0.676	2.000	0.500	1.000
1688	0.913	1.000	1.511	100	664.865	336.486	153.435	0.676	2.000	0.500	1.000
1689	0.913	1.000	1.511	100	436.486	337.162	153.435	0.676	2.000	0.500	1.000
1690	0.457	1.000	0.956	100	686.486	337.162	135.000	0.676	1.000	1.000	1.000
1691	25.566	0.452	9.674	96.429	58.784	339.865	155.225	5.933	2.087	0.479	0.655
1692	0.457	1.000	0.956	100	89.865	337.838	135.000	0.676	1.000	1.000	1.000
1693	0.913	1.000	1.511	100	195.270	337.838	153.435	0.676	2.000	0.500	1.000
1694	0.913	0.785	1.911	100	78.378	338.514	135.000	0.956	2.646	0.378	0.667
1695	15.522	0.685	6.655	100	206.081	344.595	66.038	3.378	1.864	0.537	0.840
1696	2.739	0.503	4.110	100	428.378	339.189	170.538	0.676	6.000	0.167	1.000
1697	0.913	1.000	1.511	100	464.865	339.189	116.565	0.676	2.000	0.500	1.000
1698	9.131	0.585	4.919	100	662.162	342.568	15.945	3.822	1.406	0.711	0.678
1699	0.913	1.000	1.511	100	817.568	339.189	116.565	0.676	2.000	0.500	1.000
1700	1.826	0.611	3.022	100	118.919	341.216	26.565	1.284	3.093	0.323	0.667
1701	0.457	1.000	0.956	100	427.027	339.865	135.000	0.676	1.000	1.000	1.000
1702	2.739	0.916	3.022	100	430.405	340.541	153.435	1.351	2.082	0.480	0.857
1703	0.457	1.000	0.956	100	459.459	340.541	135.000	0.676	1.000	1.000	1.000
1704	0.457	1.000	0.956	100	607.432	340.541	135.000	0.676	1.000	1.000	1.000
1705	0.913	1.000	1.511	100	659.459	340.541	153.435	0.676	2.000	0.500	1.000
1706	0.457	1.000	0.956	100	422.297	341.216	135.000	0.676	1.000	1.000	1.000
1707	0.457	1.000	0.956	100	767.568	341.216	135.000	0.676	1.000	1.000	1.000
1708	1.370	1.000	1.911	100	875.676	341.216	135.000	1.351	1.464	0.683	0.857
1709	0.457	1.000	0.956	100	351.351	341.892	135.000	0.676	1.000	1.000	1.000
1710	1.370	0.967	2.137	100	764.189	341.892	161.565	0.676	3.000	0.333	1.000
1711	0.457	1.000	0.956	100	870.270	341.892	135.000	0.676	1.000	1.000	1.000
1712	0.913	1.000	1.511	100	1018.243	341.892	153.435	0.676	2.000	0.500	1.000
1713	5.935	0.413	6.229	100	1132.432	341.892	167.471	1.351	4.378	0.228	0.812
1714	3.652	1.000	2.867	100	194.595	342.568	135.000	2.027	1.229	0.814	0.941
1715	1.370	0.524	2.137	100	431.757	342.568	108.435	1.351	1.567	0.638	0.600
1716	0.457	1.000	0.956	100	1143.243	342.568	135.000	0.676	1.000	1.000	1.000
1717	0.457	1.000	0.956	100	14.189	343.243	135.000	0.676	1.000	1.000	1.000
1718	13.240	0.705	5.812	100	264.189	347.297	35.538	4.054	1.452	0.689	0.817
1719	0.913	1.000	1.511	100	422.973	343.243	153.435	0.676	2.000	0.500	1.000
1720	12.783	0.564	7.880	100	281.081	343.919	149.036	2.722	3.399	0.294	0.789
1721	0.457	1.000	0.956	100	426.351	343.919	135.000	0.676	1.000	1.000	1.000
1722	2.283	0.674	3.022	100	446.622	343.919	153.435	1.351	2.749	0.364	0.769
1723	0.913	1.000	1.511	100	906.081	343.919	153.435	0.676	2.000	0.500	1.000
1724	2.283	0.873	2.867	100	789.189	344.595	135.000	1.814	1.882	0.531	0.714
1725	2.739	0.686	3.378	100	902.703	346.622	36.870	1.710	2.391	0.418	0.706
1726	0.913	1.000	1.511	100	332.432	345.270	153.435	0.676	2.000	0.500	1.000
1727	0.913	1.000	1.511	100	445.946	345.270	153.435	0.676	2.000	0.500	1.000
1728	1.826	0.857	2.436	100	452.703	346.622	33.690	1.351	2.000	0.500	0.800
1729	1.370	1.000	1.911	100	486.486	345.270	135.000	1.351	1.464	0.683	0.857
1730	19.175	0.608	7.554	100	664.189	345.270	116.565	4.636	1.753	0.570	0.700
1731	0.457	1.000	0.956	100	292.568	345.946	135.000	0.676	1.000	1.000	1.000
1732	0.457	1.000	0.956	100	338.514	345.946	135.000	0.676	1.000	1.000	1.000
1733	1.826	0.857	2.137	100	345.946	345.946	108.435	1.351	1.468	0.681	0.800
1734	0.457	1.000	0.956	100	810.811	345.946	135.000	0.676	1.000	1.000	1.000
1735	0.457	1.000	0.956	100	984.459	345.946	135.000	0.676	1.000	1.000	1.000
1736	0.913	1.000	1.511	100	200.000	346.622	153.435	0.676	2.000	0.500	1.000
1737	1.370	0.809	2.137	100	351.351	346.622	108.435	0.676	3.000	0.333	1.000
1738	3.196	0.496	3.445	100	441.216	347.297	168.690	2.027	1.872	0.534	0.609
1739	3.196	0.898	3.378	100	70.270	347.297	143.130	1.814	2.339	0.427	0.778
1740	3.196	0.621	3.378	100	222.973	347.297	143.130	2.027	1.791	0.558	0.700
1741	2.283	0.764	3.022	100	294.595	348.649	26.565	1.351	2.610	0.383	0.769
1742	0.913	1.000	1.511	100	902.027	347.297	116.565	0.676	2.000	0.500	1.000
1743	0.457	1.000	0.956	100	431.757	347.973	135.000	0.676	1.000	1.000	1.000
1744	0.457	1.000	0.956	100	612.838	347.973	135.000	0.676	1.000	1.000	1.000
1745	2.739	0.615	3.639	100	808.784	349.324	21.801	1.351	3.306	0.302	0.750
1746	0.457	1.000	0.956	100	108.108	348.649	135.000	0.676	1.000	1.000	1.000
1747	0.913	1.000	1.511	100	192.568	348.649	116.565	0.676	2.000	0.500	1.000
1748	0.913	1.000	1.511	100	454.054	348.649	116.565	0.676	2.000	0.500	1.000
1749	12.327	0.376	7.880	100	704.730	355.405	59.036	2.994	3.224	0.310	0.684
1750	21.001	0.306	10.336	97.826	432.432	351.351	168.690	3.977	2.843	0.352	0.639
1751	2.739	1.000	2.436	100	443.243	349.324	123.690	1.351	1.500	0.667	1.000
1752	0.913	1.000	1.511	100	487.162	349.324	153.435	0.676	2.000	0.500	1.000
1753	0.457	1.000	0.956	100	702.027	349.324	135.000	0.676	1.000	1.000	1.000
1754	0.457	1.000	0.956	100	716.216	349.324	135.000	0.676	1.000	1.000	1.000
1755	2.739	0.916	2.867	100	908.108	349.324	135.000	1.911	1.593	0.628	0.857
1756	4.565	0.579	3.445	100	999.324	350.000	168.690	2.703	1.277	0.783	0.667
1757	0.457	1.000	0.956	100	191.216	350.000	135.000	0.676	1.000	1.000	1.000
1758	0.457	1.000	0.956	100	614.189	350.000	135.000	0.676	1.000	1.000	1.000
1759	1.370	0.754	2.436	100	695.946	351.351	33.690	1.209	2.702	0.370	0.667
1760	0.457	1.000	0.956	100	783.784	350.000	135.000	0.676	1.000	1.000	1.000
1761	0.457	1.000	0.956	100	421.622	350.676	135.000	0.676	1.000	1.000	1.000
1762	0.457	1.000	0.956	100	453.378	350.676	135.000	0.676	1.000	1.000	1.000
1763	0.913	1.000	1.511	100	781.081	350.676	153.435	0.676	2.000	0.500	1.000
1764	2.283	0.641	3.378	100	870.270	352.703	36.870	1.500	3.211	0.311	0.625
1765	0.457	1.000	0.956	100	313.514	351.351	135.000	0.676	1.000	1.000	1.000
1766	2.739	0.484	3.022	100	637.838	352.703	26.565	2.565	1.059	0.944	0.545
1767	0.913	1.000	1.511	100	778.378	351.351	153.435	0.676	2.000	0.500	1.000
1768	1.826	1.000	2.436	100	793.919	351.351	146.310	1.351	2.031	0.492	0.800
1769	0.457	1.000	0.956	100	847.973	351.351	135.000	0.676	1.000	1.000	1.000
1770	0.913	1.000	1.511	100	891.892	351.351	153.435	0.676	2.000	0.500	1.000
1771	0.913	1.000	1.511	100	1012.162	351.351	153.435	0.676	2.000	0.500	1.000
1772	0.457	1.000	0.956	100	1027.027	351.351	135.000	0.676	1.000	1.000	1.000
1773	0.457	1.000	0.956	100	1031.757	351.351	135.000	0.676	1.000	1.000	1.000
1774	1.370	0.754	2.436	100	1124.324	351.351	146.310	1.209	2.702	0.370	0.667
1775	15.522	0.429	8.810	100	627.027	352.703	175.601	3.378	2.339	0.427	0.694
1776	0.457	1.000	0.956	100	722.297	352.027	135.000	0.676	1.000	1.000	1.000
1777	3.652	0.914	3.378	100	802.027	354.054	36.870	2.027	1.624	0.616	0.800
1778	1.370	0.967	2.137	100	866.892	352.027	161.565	0.676	3.000	0.333	1.000
1779	1.826	0.740	2.786	100	1020.946	352.027	165.964	0.676	4.000	0.250	1.000
1780	1.370	0.809	2.137	100	13.514	352.703	108.435	0.676	3.000	0.333	1.000
1781	0.913	1.000	1.511	100	183.784	352.703	153.435	0.676	2.000	0.500	1.000
1782	0.457	1.000	0.956	100	453.378	352.703	135.000	0.676	1.000	1.000	1.000
1783	4.109	0.521	4.872	100	497.297	355.405	33.690	2.031	3.285	0.304	0.621
1784	0.457	1.000	0.956	100	558.108	352.703	135.000	0.676	1.000	1.000	1.000
1785	0.457	1.000	0.956	100	181.757	353.378	135.000	0.676	1.000	1.000	1.000
1786	183.985	0.146	46.070	99.752	568.243	356.757	175.795	13.476	4.085	0.245	0.389
1787	1.370	0.754	2.436	100	1035.811	353.378	146.310	1.209	2.702	0.370	0.667
1788	0.913	1.000	1.511	100	494.595	354.054	153.435	0.676	2.000	0.500	1.000
1789	0.913	1.000	1.511	100	560.811	354.054	153.435	0.676	2.000	0.500	1.000
1790	27.849	0.554	8.547	91.803	621.622	356.081	161.565	5.405	1.808	0.553	0.782
1791	0.913	1.000	1.511	100	727.027	354.054	153.435	0.676	2.000	0.500	1.000
1792	2.739	1.000	2.436	100	454.054	354.730	146.310	1.351	1.500	0.667	1.000
1793	0.457	1.000	0.956	100	520.270	354.730	135.000	0.676	1.000	1.000	1.000
1794	0.457	1.000	0.956	100	1010.811	354.730	135.000	0.676	1.000	1.000	1.000
1795	0.913	0.785	1.911	100	69.595	355.405	135.000	0.956	2.646	0.378	0.667
1796	0.457	1.000	0.956	100	102.703	355.405	135.000	0.676	1.000	1.000	1.000
1797	0.913	0.785	1.911	100	311.486	355.405	135.000	0.956	2.646	0.378	0.667
1798	0.913	1.000	1.511	100	452.027	355.405	153.435	0.676	2.000	0.500	1.000
1799	0.457	1.000	0.956	100	767.568	355.405	135.000	0.676	1.000	1.000	1.000
1800	0.457	1.000	0.956	100	1066.892	355.405	135.000	0.676	1.000	1.000	1.000
1801	1.370	1.000	1.911	100	108.108	357.432	45.000	1.351	1.464	0.683	0.857
1802	2.739	0.441	4.273	100	442.568	356.081	161.565	1.311	4.593	0.218	0.667
1803	0.457	1.000	0.956	100	776.351	356.081	135.000	0.676	1.000	1.000	1.000
1804	0.457	1.000	0.956	100	797.973	356.081	135.000	0.676	1.000	1.000	1.000
1805	0.457	1.000	0.956	100	318.919	356.757	135.000	0.676	1.000	1.000	1.000
1806	0.457	1.000	0.956	100	566.892	356.757	135.000	0.676	1.000	1.000	1.000
1807	0.913	1.000	1.511	100	1070.270	356.757	153.435	0.676	2.000	0.500	1.000
1808	0.913	1.000	1.511	100	270.270	357.432	116.565	0.676	2.000	0.500	1.000
1809	0.913	1.000	1.511	100	385.811	357.432	153.435	0.676	2.000	0.500	1.000
1810	0.457	1.000	0.956	100	398.649	357.432	135.000	0.676	1.000	1.000	1.000
1811	0.913	1.000	1.511	100	518.919	357.432	153.435	0.676	2.000	0.500	1.000
1812	18.718	0.604	6.374	92.683	314.189	358.108	122.005	5.256	1.165	0.858	0.774
1813	0.457	1.000	0.956	100	886.486	358.108	135.000	0.676	1.000	1.000	1.000
1814	0.457	1.000	0.956	100	1070.270	358.108	135.000	0.676	1.000	1.000	1.000
1815	10.044	0.170	10.916	100	2.703	358.784	158.199	3.091	4.889	0.205	0.454
1816	0.457	1.000	0.956	100	488.514	358.784	135.000	0.676	1.000	1.000	1.000
1817	57.524	0.239	23.649	98.413	939.189	358.784	126.870	6.079	6.266	0.160	0.553
1818	0.457	1.000	0.956	100	989.189	358.784	135.000	0.676	1.000	1.000	1.000
1819	18.718	0.529	8.136	100	789.865	365.541	48.366	4.668	1.666	0.600	0.726
1820	0.457	1.000	0.956	100	885.811	359.459	135.000	0.676	1.000	1.000	1.000
1821	2.283	0.599	3.445	100	625.000	360.135	168.690	0.676	5.000	0.200	1.000
1822	4.565	0.925	3.639	100	844.595	360.135	158.199	1.351	2.500	0.400	1.000
1823	8.674	0.589	4.872	100	48.649	361.486	146.310	3.822	1.325	0.755	0.731
1824	0.457	1.000	0.956	100	697.297	360.811	135.000	0.676	1.000	1.000	1.000
1825	2.283	1.000	2.436	100	742.568	360.811	146.310	1.351	1.553	0.644	0.909
1826	0.457	1.000	0.956	100	781.757	360.811	135.000	0.676	1.000	1.000	1.000
1827	0.457	1.000	0.956	100	848.649	360.811	135.000	0.676	1.000	1.000	1.000
1828	1.370	1.000	1.911	100	621.622	362.838	45.000	1.351	1.464	0.683	0.857
1829	4.565	0.482	4.326	100	783.108	361.486	128.660	2.565	1.893	0.528	0.625
1830	3.196	0.543	3.022	100	264.189	364.189	26.565	2.389	1.322	0.756	0.609
1831	2.283	0.572	2.436	100	372.297	362.162	123.690	2.027	1.141	0.877	0.667
1832	0.457	1.000	0.956	100	1066.892	362.162	135.000	0.676	1.000	1.000	1.000
1833	0.457	1.000	0.956	100	745.946	362.838	135.000	0.676	1.000	1.000	1.000
1834	12.783	0.592	7.554	100	12.162	364.189	153.435	3.265	2.866	0.349	0.737
1835	0.913	1.000	1.511	100	367.568	363.514	153.435	0.676	2.000	0.500	1.000
1836	1.370	1.000	1.911	100	447.973	363.514	135.000	1.351	1.464	0.683	0.857
1837	2.739	0.769	3.022	100	870.946	364.865	153.435	1.814	2.023	0.494	0.706
1838	1.370	1.000	1.911	100	1044.595	365.541	45.000	1.351	1.464	0.683	0.857
1839	0.913	1.000	1.511	100	262.838	364.865	153.435	0.676	2.000	0.500	1.000
1840	0.457	1.000	0.956	100	318.243	364.865	135.000	0.676	1.000	1.000	1.000
1841	2.739	0.809	3.022	100	324.324	367.568	63.435	1.351	2.237	0.447	0.857
1842	0.457	1.000	0.956	100	459.459	364.865	135.000	0.676	1.000	1.000	1.000
1843	0.457	1.000	0.956	100	572.297	364.865	135.000	0.676	1.000	1.000	1.000
1844	0.457	1.000	0.956	100	677.027	364.865	135.000	0.676	1.000	1.000	1.000
1845	4.565	0.419	3.639	100	737.162	366.892	21.801	2.565	1.380	0.725	0.625
1846	2.283	0.873	2.867	100	749.324	364.865	135.000	1.433	2.308	0.433	0.769
1847	0.457	1.000	0.956	100	1054.054	364.865	135.000	0.676	1.000	1.000	1.000
1848	0.457	1.000	0.956	100	1070.270	364.865	135.000	0.676	1.000	1.000	1.000
1849	0.913	1.000	1.511	100	43.919	365.541	153.435	0.676	2.000	0.500	1.000
1850	0.457	1.000	0.956	100	48.649	365.541	135.000	0.676	1.000	1.000	1.000
1851	0.457	1.000	0.956	100	552.703	365.541	135.000	0.676	1.000	1.000	1.000
1852	0.913	1.000	1.511	100	994.595	365.541	116.565	0.676	2.000	0.500	1.000
1853	0.457	1.000	0.956	100	329.730	366.216	135.000	0.676	1.000	1.000	1.000
1854	1.826	1.000	1.911	100	430.405	366.216	135.000	1.351	1.000	1.000	1.000
1855	0.457	1.000	0.956	100	572.973	366.216	135.000	0.676	1.000	1.000	1.000
1856	0.457	1.000	0.956	100	677.703	366.216	135.000	0.676	1.000	1.000	1.000
1857	0.457	1.000	0.956	100	486.486	366.892	135.000	0.676	1.000	1.000	1.000
1858	2.283	0.764	2.786	100	996.622	366.892	165.964	1.351	2.188	0.457	0.769
1859	0.457	1.000	0.956	100	1000.000	366.892	135.000	0.676	1.000	1.000	1.000
1860	0.913	1.000	1.511	100	434.459	367.568	153.435	0.676	2.000	0.500	1.000
1861	0.457	1.000	0.956	100	574.324	367.568	135.000	0.676	1.000	1.000	1.000
1862	0.457	1.000	0.956	100	985.135	367.568	135.000	0.676	1.000	1.000	1.000
1863	0.457	1.000	0.956	100	1001.351	367.568	135.000	0.676	1.000	1.000	1.000
1864	0.913	1.000	1.511	100	23.649	368.243	153.435	0.676	2.000	0.500	1.000
1865	1.370	1.000	1.911	100	45.946	368.243	135.000	1.351	1.464	0.683	0.857
1866	0.457	1.000	0.956	100	491.892	368.243	135.000	0.676	1.000	1.000	1.000
1867	0.913	1.000	1.511	100	558.108	368.243	153.435	0.676	2.000	0.500	1.000
1868	1.370	1.000	1.911	100	752.703	368.243	135.000	1.351	1.464	0.683	0.857
1869	0.457	1.000	0.956	100	10.135	368.919	135.000	0.676	1.000	1.000	1.000
1870	0.913	1.000	1.511	100	29.054	368.919	153.435	0.676	2.000	0.500	1.000
1871	0.913	1.000	1.511	100	8.108	369.595	153.435	0.676	2.000	0.500	1.000
1872	1.370	0.967	2.137	100	35.811	369.595	161.565	0.676	3.000	0.333	1.000
1873	0.457	1.000	0.956	100	291.216	369.595	135.000	0.676	1.000	1.000	1.000
1874	0.457	1.000	0.956	100	977.703	369.595	135.000	0.676	1.000	1.000	1.000
1875	0.913	1.000	1.511	100	979.054	369.595	153.435	0.676	2.000	0.500	1.000
1876	0.457	1.000	0.956	100	5.405	370.270	135.000	0.676	1.000	1.000	1.000
1877	1.826	1.000	1.911	100	14.865	370.270	135.000	1.351	1.000	1.000	1.000
1878	0.457	1.000	0.956	100	992.568	370.270	135.000	0.676	1.000	1.000	1.000
1879	0.913	1.000	1.511	100	1064.865	370.270	153.435	0.676	2.000	0.500	1.000
1880	0.913	1.000	1.511	100	2.027	370.946	153.435	0.676	2.000	0.500	1.000
1881	1.370	0.967	2.137	100	33.108	370.946	161.565	0.676	3.000	0.333	1.000
1882	0.457	1.000	0.956	100	118.919	370.946	135.000	0.676	1.000	1.000	1.000
1883	5.022	0.637	3.822	100	435.135	371.622	135.000	2.703	1.289	0.775	0.688
1884	19.175	0.496	9.387	100	42.568	372.297	149.744	4.243	2.797	0.358	0.718
1885	2.283	0.491	3.022	100	372.297	371.622	116.565	1.351	2.136	0.468	0.667
1886	4.109	0.539	4.110	100	744.595	372.973	170.538	2.027	2.081	0.481	0.692
1887	0.457	1.000	0.956	100	871.622	371.622	135.000	0.676	1.000	1.000	1.000
1888	0.457	1.000	0.956	100	415.541	372.297	135.000	0.676	1.000	1.000	1.000
1889	0.457	1.000	0.956	100	8.784	372.973	135.000	0.676	1.000	1.000	1.000
1890	0.457	1.000	0.956	100	228.378	372.973	135.000	0.676	1.000	1.000	1.000
1891	0.457	1.000	0.956	100	329.730	372.973	135.000	0.676	1.000	1.000	1.000
1892	0.457	1.000	0.956	100	367.568	372.973	135.000	0.676	1.000	1.000	1.000
1893	41.545	0.325	14.333	100	433.784	372.973	98.130	5.294	2.996	0.334	0.639
1894	2.739	0.503	4.110	100	693.919	372.973	170.538	0.676	6.000	0.167	1.000
1895	1.370	1.000	1.911	100	761.486	374.324	45.000	1.351	1.464	0.683	0.857
1896	0.457	1.000	0.956	100	820.270	372.973	135.000	0.676	1.000	1.000	1.000
1897	0.913	0.785	1.911	100	865.541	374.324	45.000	0.956	2.646	0.378	0.667
1898	0.457	1.000	0.956	100	459.459	373.649	135.000	0.676	1.000	1.000	1.000
1899	0.457	1.000	0.956	100	677.027	373.649	135.000	0.676	1.000	1.000	1.000
1900	2.283	0.513	3.639	100	1016.216	375.000	21.801	1.284	4.051	0.247	0.667
1901	0.913	1.000	1.511	100	23.649	374.324	153.435	0.676	2.000	0.500	1.000
1902	48.393	0.365	17.306	100	145.946	374.324	141.340	5.939	3.220	0.311	0.700
1903	0.457	1.000	0.956	100	395.946	374.324	135.000	0.676	1.000	1.000	1.000
1904	1.370	1.000	1.911	100	592.568	374.324	135.000	1.351	1.464	0.683	0.857
1905	5.935	0.530	4.533	100	745.270	378.378	63.435	2.703	1.899	0.526	0.667
1906	0.457	1.000	0.956	100	821.622	374.324	135.000	0.676	1.000	1.000	1.000
1907	1.826	1.000	1.911	100	869.595	374.324	135.000	1.351	1.000	1.000	1.000
1908	0.913	1.000	1.511	100	701.351	375.000	153.435	0.676	2.000	0.500	1.000
1909	0.457	1.000	0.956	100	70.270	375.676	135.000	0.676	1.000	1.000	1.000
1910	0.457	1.000	0.956	100	510.811	375.676	135.000	0.676	1.000	1.000	1.000
1911	1.370	1.000	1.911	100	133.784	377.703	45.000	1.351	1.464	0.683	0.857
1912	0.457	1.000	0.956	100	336.486	376.351	135.000	0.676	1.000	1.000	1.000
1913	1.826	0.857	2.137	100	700.676	376.351	108.435	1.351	1.468	0.681	0.800
1914	0.457	1.000	0.956	100	1019.595	376.351	135.000	0.676	1.000	1.000	1.000
1915	1.826	0.857	2.436	100	52.027	377.027	146.310	1.351	2.000	0.500	0.800
1916	91.308	0.208	22.164	99.500	67.568	377.703	142.431	9.774	2.480	0.403	0.569
1917	0.913	1.000	1.511	100	136.486	377.027	153.435	0.676	2.000	0.500	1.000
1918	0.913	1.000	1.511	100	232.432	377.027	153.435	0.676	2.000	0.500	1.000
1919	3.652	0.349	4.778	100	372.297	377.027	135.000	2.389	2.369	0.422	0.533
1920	0.913	1.000	1.511	100	807.432	377.027	153.435	0.676	2.000	0.500	1.000
1921	0.457	1.000	0.956	100	830.405	377.027	135.000	0.676	1.000	1.000	1.000
1922	1.826	0.611	3.022	100	869.595	377.027	153.435	1.284	3.093	0.323	0.667
1923	0.913	1.000	1.511	100	1022.297	377.027	153.435	0.676	2.000	0.500	1.000
1924	19.631	0.526	9.411	100	127.703	381.757	21.038	4.233	2.110	0.474	0.741
1925	1.370	0.967	2.137	100	234.459	377.703	161.565	0.676	3.000	0.333	1.000
1926	3.652	0.410	4.919	100	574.324	379.054	15.945	1.351	5.225	0.191	0.727
1927	1.370	0.524	2.137	100	798.649	377.703	108.435	1.351	1.567	0.638	0.600
1928	9.131	0.784	4.919	100	241.216	379.730	15.945	2.703	1.768	0.566	0.851
1929	0.913	1.000	1.511	100	464.865	378.378	116.565	0.676	2.000	0.500	1.000
1930	4.109	0.832	3.639	100	814.189	381.757	68.199	1.351	2.386	0.419	0.947
1931	0.457	1.000	0.956	100	956.081	379.054	135.000	0.676	1.000	1.000	1.000
1932	0.913	1.000	1.511	100	236.486	379.730	153.435	0.676	2.000	0.500	1.000
1933	2.739	1.000	2.436	100	715.541	379.730	146.310	1.351	1.500	0.667	1.000
1934	23.740	0.748	7.909	100	854.054	382.432	19.983	4.730	1.653	0.605	0.846
1935	13.240	0.326	10.683	100	56.081	380.405	145.305	2.499	6.360	0.157	0.637
1936	24.196	0.555	8.248	100	239.865	380.405	124.992	5.405	1.390	0.719	0.774
1937	1.370	0.524	2.137	100	345.946	380.405	108.435	1.351	1.567	0.638	0.600
1938	1.370	0.967	2.137	100	64.865	381.081	161.565	0.676	3.000	0.333	1.000
1939	0.913	1.000	1.511	100	286.486	381.081	116.565	0.676	2.000	0.500	1.000
1940	3.652	0.820	3.445	100	734.459	381.757	168.690	1.351	2.232	0.448	0.889
1941	5.935	0.753	4.533	100	739.189	383.108	26.565	2.703	1.959	0.510	0.722
1942	0.457	1.000	0.956	100	318.919	381.757	135.000	0.676	1.000	1.000	1.000
1943	0.457	1.000	0.956	100	361.486	383.108	135.000	0.676	1.000	1.000	1.000
1944	0.457	1.000	0.956	100	362.838	383.108	135.000	0.676	1.000	1.000	1.000
1945	0.457	1.000	0.956	100	367.568	383.108	135.000	0.676	1.000	1.000	1.000
1946	0.913	1.000	1.511	100	691.892	383.108	116.565	0.676	2.000	0.500	1.000
1947	1.826	1.000	1.911	100	345.946	383.784	135.000	1.351	1.000	1.000	1.000
1948	0.457	1.000	0.956	100	467.568	383.784	135.000	0.676	1.000	1.000	1.000
1949	2.283	0.764	3.022	100	572.973	383.784	153.435	1.351	2.610	0.383	0.769
1950	2.283	0.873	2.867	100	806.757	383.784	135.000	1.513	2.188	0.457	0.714
1951	1.826	0.740	2.786	100	234.459	384.459	165.964	0.676	4.000	0.250	1.000
1952	1.370	0.967	2.137	100	374.324	384.459	161.565	0.676	3.000	0.333	1.000
1953	0.457	1.000	0.956	100	422.973	384.459	135.000	0.676	1.000	1.000	1.000
1954	1.370	0.967	2.137	100	862.838	384.459	161.565	0.676	3.000	0.333	1.000
1955	0.913	1.000	1.511	100	1033.784	384.459	153.435	0.676	2.000	0.500	1.000
1956	4.109	0.447	5.146	100	233.784	387.162	23.199	1.594	4.139	0.242	0.643
1957	0.913	1.000	1.511	100	572.973	385.135	116.565	0.676	2.000	0.500	1.000
1958	7.305	0.671	4.778	100	733.108	387.162	171.870	2.703	1.410	0.709	0.780
1959	10.957	0.649	5.812	100	869.595	385.135	125.538	4.126	1.626	0.615	0.706
1960	2.739	0.532	3.940	100	967.568	387.162	30.964	1.500	3.827	0.261	0.632
1961	0.457	1.000	0.956	100	1054.054	385.135	135.000	0.676	1.000	1.000	1.000
1962	0.457	1.000	0.956	100	1072.297	385.135	135.000	0.676	1.000	1.000	1.000
1963	4.565	0.650	4.273	100	1085.135	387.162	18.435	1.925	2.663	0.376	0.741
1964	4.109	0.367	5.447	100	100.676	385.811	150.255	2.007	4.041	0.247	0.474
1965	1.370	1.000	1.911	100	291.892	387.162	45.000	1.351	1.464	0.683	0.857
1966	1.826	1.000	1.911	100	420.270	385.811	135.000	1.351	1.000	1.000	1.000
1967	1.370	0.967	2.137	100	1069.595	385.811	161.565	0.676	3.000	0.333	1.000
1968	0.913	1.000	1.511	100	283.784	386.486	153.435	0.676	2.000	0.500	1.000
1969	0.457	1.000	0.956	100	372.297	386.486	135.000	0.676	1.000	1.000	1.000
1970	1.370	0.967	2.137	100	1027.027	386.486	161.565	0.676	3.000	0.333	1.000
1971	1.370	0.643	2.436	100	1031.757	386.486	123.690	1.209	2.702	0.370	0.667
1972	0.457	1.000	0.956	100	1101.351	386.486	135.000	0.676	1.000	1.000	1.000
1973	14.153	0.227	8.887	100	343.919	388.514	171.254	5.165	1.848	0.541	0.431
1974	0.457	1.000	0.956	100	479.054	387.162	135.000	0.676	1.000	1.000	1.000
1975	1.826	0.740	2.786	100	1065.541	387.162	165.964	0.676	4.000	0.250	1.000
1976	0.913	1.000	1.511	100	434.459	387.838	153.435	0.676	2.000	0.500	1.000
1977	0.457	1.000	0.956	100	439.865	387.838	135.000	0.676	1.000	1.000	1.000
1978	0.457	1.000	0.956	100	508.108	387.838	135.000	0.676	1.000	1.000	1.000
1979	1.370	1.000	1.911	100	586.486	389.189	45.000	1.351	1.464	0.683	0.857
1980	1.826	1.000	1.911	100	834.459	387.838	135.000	1.351	1.000	1.000	1.000
1981	2.739	0.686	3.022	100	9.459	391.216	63.435	1.925	1.809	0.553	0.667
1982	0.457	1.000	0.956	100	362.162	388.514	135.000	0.676	1.000	1.000	1.000
1983	0.457	1.000	0.956	100	589.865	388.514	135.000	0.676	1.000	1.000	1.000
1984	0.457	1.000	0.956	100	828.378	388.514	135.000	0.676	1.000	1.000	1.000
1985	0.457	1.000	0.956	100	842.568	388.514	135.000	0.676	1.000	1.000	1.000
1986	0.457	1.000	0.956	100	270.946	389.189	135.000	0.676	1.000	1.000	1.000
1987	4.565	0.736	4.273	100	581.757	390.541	18.435	1.351	2.795	0.358	0.909
1988	3.196	0.621	3.940	100	768.243	391.216	30.964	1.513	3.393	0.295	0.700
1989	0.457	1.000	0.956	100	794.595	389.189	135.000	0.676	1.000	1.000	1.000
1990	0.457	1.000	0.956	100	812.838	389.189	135.000	0.676	1.000	1.000	1.000
1991	1.370	0.967	2.137	100	1029.730	389.189	161.565	0.676	3.000	0.333	1.000
1992	0.913	1.000	1.511	100	164.865	390.541	116.565	0.676	2.000	0.500	1.000
1993	0.457	1.000	0.956	100	243.243	390.541	135.000	0.676	1.000	1.000	1.000
1994	0.913	1.000	1.511	100	286.486	390.541	153.435	0.676	2.000	0.500	1.000
1995	1.826	0.611	3.022	100	316.892	390.541	153.435	1.209	3.493	0.286	0.667
1996	0.457	1.000	0.956	100	361.486	390.541	135.000	0.676	1.000	1.000	1.000
1997	0.457	1.000	0.956	100	488.514	390.541	135.000	0.676	1.000	1.000	1.000
1998	14.153	0.688	5.812	100	354.730	396.622	54.462	4.054	1.512	0.662	0.756
1999	1.826	1.000	2.436	100	689.189	391.216	146.310	1.351	2.031	0.492	0.800
[truncated: 2,786 more rows]
