# Supplementary material for: Microwave Dielectric Properties of CCTO/PVA Composites
Source: Hindawi journal article supplement (doi:10.1155/2018/6067519), 2018-01-01
Supplement: f1 [file 6067519.f1.zip › 6067519.f1/Legend_of_documents.txt]

1- Porosity of the sample PVA (resume);
1b - Porosity of the sample PVA (full data);
2- Porosity of the sample CCTO(20) (resume);
2b- Porosity of the sample CCTO(20) (full data);
3- Porosity of the sample CCTO(50) (resume);
3b- Porosity of the sample CCTO(50) (full data);
4- Micrograph of PVA with representation of pores (red);
5- Micrograph of CCTO(20) with representation of pores (red);
6- Micrograph of CCTO(50) with representation of pores (red);
