# Supplementary figures and images for: Microwave Dielectric Properties of CCTO/PVA Composites
Source: Hindawi journal article supplement (doi:10.1155/2018/6067519), 2018-01-01

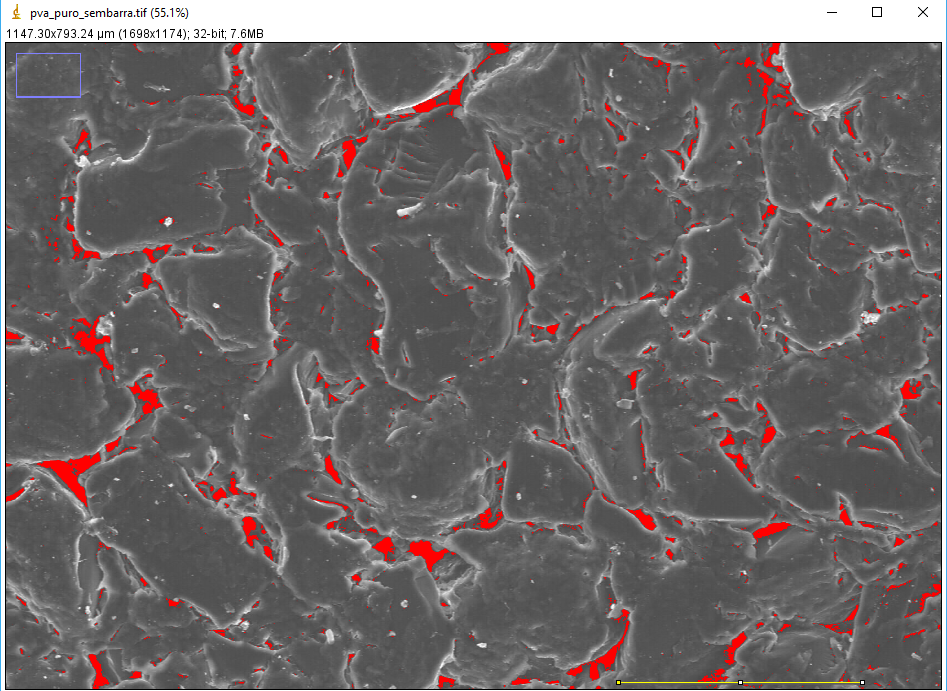

Supplement: f1 [file 6067519.f1.zip › 6067519.f1/4_pva_puro_x100_poros.tif]

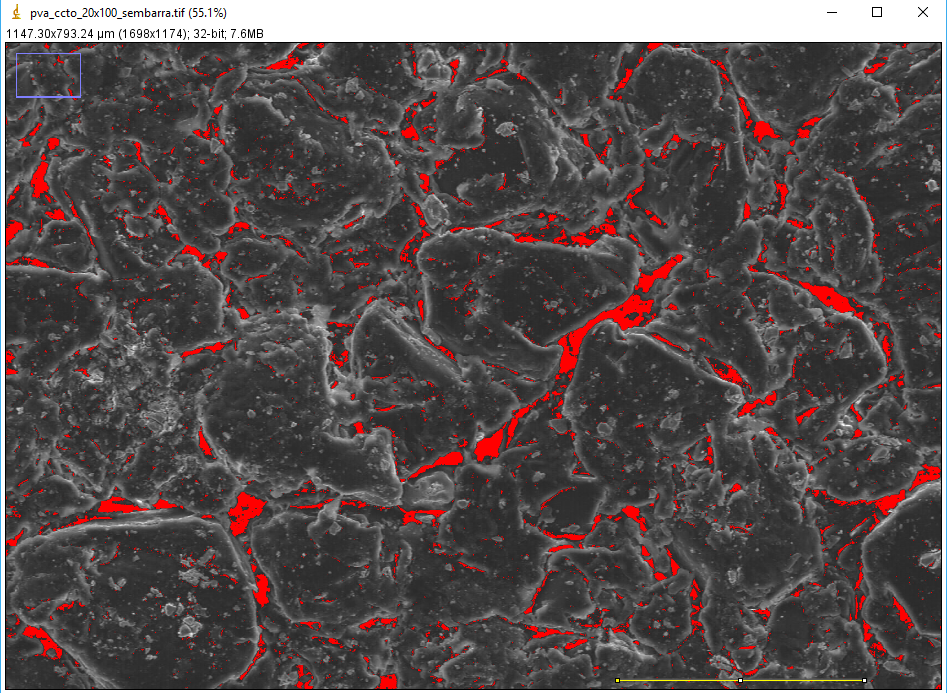

Supplement: f1 [file 6067519.f1.zip › 6067519.f1/5_pva_ccto_20x100_poros.tif]

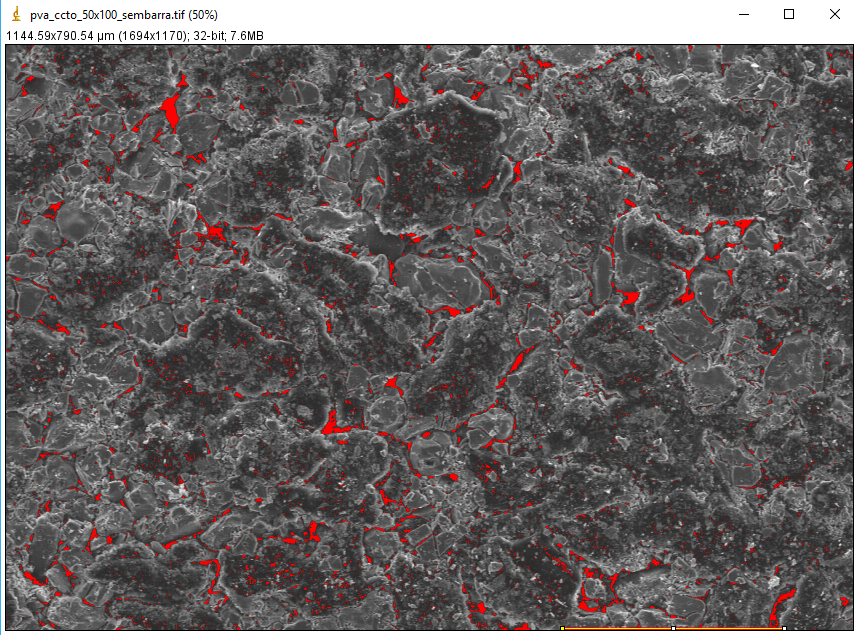

Supplement: f1 [file 6067519.f1.zip › 6067519.f1/6_pva_ccto_50x100_poros.tif]
